# Supplementary material for: NIBBS-Search for Fast and Accurate Prediction of Phenotype-Biased Metabolic Systems
Source: PLOS journal article supplement (doi:10.1371/journal.pcbi.1002490), 2012-05-10
Supplement: S24 (10.1371/journal.pcbi.1002490.s024) [file journal.pcbi.1002490.s024]

## NIBBS-Search Algorithms Pseudocode

---

**Algorithm 1: NIBBS-Search: Network Instance Based Biased Subgraph Search**

---

**Input:**  $P$ —A set of positive network instances

$N$ —A set of negative network instances

$\phi_0$ —The minimum bias score for seed expansion

**Output:**  $M$ —A set of maximally-biased subgraphs

```
1  $\Gamma \leftarrow \text{GenerateSeedSets}()$ ;  
2 Remove all seed sets  $S$  from  $\Gamma$  where  $\phi(S, P, N) < \phi_0$ ;  
3 foreach seed set  $S \in \Gamma$  do  
4    $M = M \cup \text{ExpandSeedSet}()$ ;
```

---

---

**Algorithm 2: GenerateSeedSets**

---

**Input:**  $E_G$ —The edge set of the network map

$\kappa$ —The maximum size of the seed set

**Output:**  $R$ —A set of seed sets

```
1  $E' \leftarrow$  Sort the edges in  $E_G$  by their  $\phi$ -values;  
2 while  $E'$  contains unmarked edges do  
3    $e_0 = \leftarrow$  Unmarked edge in  $E'$  with the least  $\phi$ -value;  
4    $S \leftarrow S \cup e_0$ ;  
5   Mark  $e_0$ ;  
6    $C \leftarrow \text{GenerateSeedCandidates}(S)$  ;  
7   while  $C \neq \emptyset$  AND  $|S| \leq \kappa$  do  
8      $e \leftarrow$  Best candidate in  $C$ ;  
9      $S \leftarrow S \cup e$ ;  
10    Mark  $e$ ;  
11     $C \leftarrow \text{GenerateSeedCandidates}(S)$   
12   $R \leftarrow R \cup S$ ;
```

---

---

**Algorithm 3: ExpandSeedSet**

---

**Input:** $S$ —A seed set of edges $\alpha$ —Expansion bound**Output:**  $S$ —The expanded set of edges

```
1  $C \leftarrow \text{GenerateExpansionCandidates}(S, \alpha)$ ;  
2 while  $C \neq \emptyset$  do  
3    $e \leftarrow$  Select best candidate from  $C$ ;  
4    $S \leftarrow S \cup e$ ;  
5    $C \leftarrow \text{GenerateExpansionCandidates}(S, \alpha)$ ;
```

---
