# Supplementary material for: NIBBS-Search for Fast and Accurate Prediction of Phenotype-Biased Metabolic Systems
Source: PLoS Comput Biol. 2012 May 10;8(5):e1002490. doi: 10.1371/journal.pcbi.1002490 (PMC3349732; doi:10.1371/journal.pcbi.1002490)
Supplement: Table S1 — Organisms used in the experiments. This file consists of information regarding the organisms utilized in the various experiments. (XLS) [file pcbi.1002490.s001.xls]

## Sheet: Template
Positive Instances ()				Negative Instances ()
KEGG ID	Organism Name			KEGG ID	Organism Name
	Short	Full			Short	Full
ama	A.marginale	Anaplasma marginale St. Maries		bad	B.adolescentis	Bifidobacterium adolescentis

## Sheet: Aerobic
Positive Instances (Aerobic Organisms)				Negative Instances (Anaerobic Organisms)
KEGG ID	Organism Name			KEGG ID	Organism Name
	Short	Full			Short	Full
ama	A.marginale	Anaplasma marginale St. Maries		bad	B.adolescentis	Bifidobacterium adolescentis
bba	B.bacteriovorus	Bdellovibrio bacteriovorus		bfr	B.fragilis	Bacteroides fragilis YCH46
bbr	B.bronchiseptica	Bordetella bronchiseptica		bfs	B.fragilis_NCTC9343	Bacteroides fragilis NCTC9343
bca	B.cereus_ATCC10987	Bacillus cereus ATCC 10987		blo	B.longum	Bifidobacterium longum NCC2705
bpa	B.parapertussis	Bordetella parapertussis		bth	B.thetaiotaomicron	Bacteroides thetaiotaomicron
cdi	C.diphtheriae	Corynebacterium diphtheriae		bvi	B.vietnamiensis	Burkholderia vietnamiensis
chu	C.hutchinsonii	Cytophaga hutchinsonii		cac	C.acetobutylicum	Clostridium acetobutylicum
eli	E.litoralis	Erythrobacter litoralis		cbo	C.botulinum	Clostridium botulinum A ATCC 3502
gka	G.kaustophilus	Geobacillus kaustophilus		cce	C.cellulolyticum	Clostridium cellulolyticum
gox	G.oxydans	Gluconobacter oxydans		cdf	C.difficile	Clostridium difficile 630
hhe	H.hepaticus	Helicobacter hepaticus		chy	C.hydrogenoformans	Carboxydothermus hydrogenoformans
hpa	H.pylori_HPAG1	Helicobacter pylori HPAG1		cli	C.limicola	Chlorobium limicola
lil	L.interrogans	Leptospira interrogans serovar lai		cno	C.novyi	Clostridium novyi
lpf	L.pneumophila_Lens	Legionella pneumophila Lens		cpe	C.perfringens	Clostridium perfringens 13
lpn	L.pneumophila	Legionella pneumophila Philadelphia 1		cpf	C.perfringens_ATCC13124	Clostridium perfringens ATCC 13124
lxx	L.xyli	Leifsonia xyli xyli CTCB07		cpr	C.perfringens_SM101	Clostridium perfringens SM101
mbo	M.bovis	Mycobacterium bovis AF2122/97		ctc	C.tetani	Clostridium tetani E88
mlu	M.luteus	Micrococcus luteus		cth	C.thermocellum	Clostridium thermocellum
mpa	M.avium_paratuberculosis	Mycobacterium avium paratuberculosis		dae	D.acetoxidans	Desulfotomaculum acetoxidans
mxa	M.xanthus	Myxococcus xanthus		dar	D.aromatica	Dechloromonas aromatica
nfa	N.farcinica	Nocardia farcinica		dat	D.autotrophicum	Desulfobacterium autotrophicum
ngo	N.gonorrhoeae	Neisseria gonorrhoeae FA 1090		dde	D.desulfuricans	Desulfovibrio desulfuricans G20
oih	O.iheyensis	Oceanobacillus iheyensis		deh	Dehalococcoides_CBDB1	Dehalococcoides sp. CBDB1
pae	P.aeruginosa	Pseudomonas aeruginosa PAO1		det	D.ethenogenes	Dehalococcoides ethenogenes
rco	R.conorii	Rickettsia conorii		dps	D.psychrophila	Desulfotalea psychrophila
rpr	R.prowazekii	Rickettsia prowazekii		drm	D.reducens	Desulfotomaculum reducens
rso	R.solanacearum	Ralstonia solanacearum GMI1000		dsy	D.hafniense	Desulfitobacterium hafniense Y51
sco	S.coelicolor	Streptomyces coelicolor		dvl	D.vulgaris_DP4	Desulfovibrio vulgaris DP4
sma	S.avermitilis	Streptomyces avermitilis		dvu	D.vulgaris	Desulfovibrio vulgaris Hildenborough
sme	S.meliloti	Sinorhizobium meliloti		eba	Azoarcus_EbN1	Aromatoleum aromaticum EbN1
sru	S.ruber	Salinibacter ruber		fnu	F.nucleatum	Fusobacterium nucleatum
ssp	S.saprophyticus	Staphylococcus saprophyticus		gme	G.metallireducens	Geobacter metallireducens
tfu	T.fusca	Thermobifida fusca		gsu	G.sulfurreducens	Geobacter sulfurreducens
				har	H.arsenicoxydans	Herminiimonas arsenicoxydans
				hdu	H.ducreyi	Haemophilus ducreyi
				msu	M.succiniciproducens	Mannheimia succiniciproducens
				mta	M.thermoacetica	Moorella thermoacetica
				nam	N.profundicola	Nautilia profundicola
				pac	P.acnes	Propionibacterium acnes KPA171202
				pca	P.carbinolicus	Pelobacter carbinolicus
				pgi	P.gingivalis	Porphyromonas gingivalis W83
				pin	P.ingrahamii	Psychromonas ingrahamii
				plt	P.luteolum	Pelodictyon luteolum
				ppd	P.propionicus	Pelobacter propionicus
				rru	R.rubrum	Rhodospirillum rubrum
				sat	S.aciditrophicus	Syntrophus aciditrophicus
				sfu	S.fumaroxidans	Syntrophobacter fumaroxidans
				stc	S.thermophilus_CNRZ	Streptococcus thermophilus CNRZ1066
				stl	S.thermophilus_LMG	Streptococcus thermophilus LMG18311
				swo	S.wolfei	Syntrophomonas wolfei
				tcx	T.crunogena	Thiomicrospira crunogena
				tdn	T.denitrificans_ATCC33889	Sulfurimonas denitrificans
				tmz	Thauera	Thauera sp. MZ1T
				tte	T.tengcongensis	Thermoanaerobacter tengcongensis

## Sheet: Anaerobic
Positive Instances (Anaerobic Organisms)				Negative Instances (Aerobic Organisms)
KEGG ID	Organism Name			KEGG ID	Organism Name
	Short	Full			Short	Full
bad	B.adolescentis	Bifidobacterium adolescentis		ama	A.marginale	Anaplasma marginale St. Maries
bfr	B.fragilis	Bacteroides fragilis YCH46		bba	B.bacteriovorus	Bdellovibrio bacteriovorus
bfs	B.fragilis_NCTC9343	Bacteroides fragilis NCTC9343		bbr	B.bronchiseptica	Bordetella bronchiseptica
blo	B.longum	Bifidobacterium longum NCC2705		bca	B.cereus_ATCC10987	Bacillus cereus ATCC 10987
bth	B.thetaiotaomicron	Bacteroides thetaiotaomicron		bpa	B.parapertussis	Bordetella parapertussis
bvi	B.vietnamiensis	Burkholderia vietnamiensis		cdi	C.diphtheriae	Corynebacterium diphtheriae
cac	C.acetobutylicum	Clostridium acetobutylicum		chu	C.hutchinsonii	Cytophaga hutchinsonii
cbo	C.botulinum	Clostridium botulinum A ATCC 3502		eli	E.litoralis	Erythrobacter litoralis
cce	C.cellulolyticum	Clostridium cellulolyticum		gka	G.kaustophilus	Geobacillus kaustophilus
cdf	C.difficile	Clostridium difficile 630		gox	G.oxydans	Gluconobacter oxydans
chy	C.hydrogenoformans	Carboxydothermus hydrogenoformans		hhe	H.hepaticus	Helicobacter hepaticus
cli	C.limicola	Chlorobium limicola		hpa	H.pylori_HPAG1	Helicobacter pylori HPAG1
cno	C.novyi	Clostridium novyi		lil	L.interrogans	Leptospira interrogans serovar lai
cpe	C.perfringens	Clostridium perfringens 13		lpf	L.pneumophila_Lens	Legionella pneumophila Lens
cpf	C.perfringens_ATCC13124	Clostridium perfringens ATCC 13124		lpn	L.pneumophila	Legionella pneumophila Philadelphia 1
cpr	C.perfringens_SM101	Clostridium perfringens SM101		lxx	L.xyli	Leifsonia xyli xyli CTCB07
ctc	C.tetani	Clostridium tetani E88		mbo	M.bovis	Mycobacterium bovis AF2122/97
cth	C.thermocellum	Clostridium thermocellum		mlu	M.luteus	Micrococcus luteus
dae	D.acetoxidans	Desulfotomaculum acetoxidans		mpa	M.avium_paratuberculosis	Mycobacterium avium paratuberculosis
dar	D.aromatica	Dechloromonas aromatica		mxa	M.xanthus	Myxococcus xanthus
dat	D.autotrophicum	Desulfobacterium autotrophicum		nfa	N.farcinica	Nocardia farcinica
dde	D.desulfuricans	Desulfovibrio desulfuricans G20		ngo	N.gonorrhoeae	Neisseria gonorrhoeae FA 1090
deh	Dehalococcoides_CBDB1	Dehalococcoides sp. CBDB1		oih	O.iheyensis	Oceanobacillus iheyensis
det	D.ethenogenes	Dehalococcoides ethenogenes		pae	P.aeruginosa	Pseudomonas aeruginosa PAO1
dps	D.psychrophila	Desulfotalea psychrophila		rco	R.conorii	Rickettsia conorii
drm	D.reducens	Desulfotomaculum reducens		rpr	R.prowazekii	Rickettsia prowazekii
dsy	D.hafniense	Desulfitobacterium hafniense Y51		rso	R.solanacearum	Ralstonia solanacearum GMI1000
dvl	D.vulgaris_DP4	Desulfovibrio vulgaris DP4		sco	S.coelicolor	Streptomyces coelicolor
dvu	D.vulgaris	Desulfovibrio vulgaris Hildenborough		sma	S.avermitilis	Streptomyces avermitilis
eba	Azoarcus_EbN1	Aromatoleum aromaticum EbN1		sme	S.meliloti	Sinorhizobium meliloti
fnu	F.nucleatum	Fusobacterium nucleatum		sru	S.ruber	Salinibacter ruber
gme	G.metallireducens	Geobacter metallireducens		ssp	S.saprophyticus	Staphylococcus saprophyticus
gsu	G.sulfurreducens	Geobacter sulfurreducens		tfu	T.fusca	Thermobifida fusca
har	H.arsenicoxydans	Herminiimonas arsenicoxydans
hdu	H.ducreyi	Haemophilus ducreyi
msu	M.succiniciproducens	Mannheimia succiniciproducens
mta	M.thermoacetica	Moorella thermoacetica
nam	N.profundicola	Nautilia profundicola
pac	P.acnes	Propionibacterium acnes KPA171202
pca	P.carbinolicus	Pelobacter carbinolicus
pgi	P.gingivalis	Porphyromonas gingivalis W83
pin	P.ingrahamii	Psychromonas ingrahamii
plt	P.luteolum	Pelodictyon luteolum
ppd	P.propionicus	Pelobacter propionicus
rru	R.rubrum	Rhodospirillum rubrum
sat	S.aciditrophicus	Syntrophus aciditrophicus
sfu	S.fumaroxidans	Syntrophobacter fumaroxidans
stc	S.thermophilus_CNRZ	Streptococcus thermophilus CNRZ1066
stl	S.thermophilus_LMG	Streptococcus thermophilus LMG18311
swo	S.wolfei	Syntrophomonas wolfei
tcx	T.crunogena	Thiomicrospira crunogena
tdn	T.denitrificans_ATCC33889	Sulfurimonas denitrificans
tmz	Thauera	Thauera sp. MZ1T
tte	T.tengcongensis	Thermoanaerobacter tengcongensis

## Sheet: TCA
Positive Instances (TCA Utilizing Organisms)				Negative Instances (rTCA Utilizing Organisms)
KEGG ID	Organism Name			KEGG ID	Organism Name
	Short	Full			Short	Full
ama	A.marginale	Anaplasma marginale St. Maries		aae	A.aeolicus	Aquifex aeolicus
bba	B.bacteriovorus	Bdellovibrio bacteriovorus		cli	C.limicola	Chlorobium limicola
bbr	B.bronchiseptica	Bordetella bronchiseptica		cte	C.tepidum	Chlorobaculum tepidum
bpa	B.parapertussis	Bordetella parapertussis		hth	H.thermophilus	Hydrogenobacter thermophilus
eco	E.coli	Escherichia coli K-12 MG1655		nam	N.profundicola	Nautilia profundicola
gka	G.kaustophilus	Geobacillus kaustophilus		tdn	T.denitrificans_ATCC33889	Sulfurimonas denitrificans
hpa	H.pylori_HPAG1	Helicobacter pylori HPAG1
lil	L.interrogans	Leptospira interrogans serovar lai
lin	L.innocua	Listeria innocua
lpf	L.pneumophila_Lens	Legionella pneumophila Lens
mxa	M.xanthus	Myxococcus xanthus
ngo	N.gonorrhoeae	Neisseria gonorrhoeae FA 1090
sme	S.meliloti	Sinorhizobium meliloti
son	S.oneidensis	Shewanella oneidensis
ssp	S.saprophyticus	Staphylococcus saprophyticus

## Sheet: rTCA
Positive Instances (rTCA Utilizing Organisms)				Negative Instances (TCA Utilizing Organisms)
KEGG ID	Organism Name			KEGG ID	Organism Name
	Short	Full			Short	Full
aae	A.aeolicus	Aquifex aeolicus		ama	A.marginale	Anaplasma marginale St. Maries
cli	C.limicola	Chlorobium limicola		bba	B.bacteriovorus	Bdellovibrio bacteriovorus
cte	C.tepidum	Chlorobaculum tepidum		bbr	B.bronchiseptica	Bordetella bronchiseptica
hth	H.thermophilus	Hydrogenobacter thermophilus		bbr	B.bronchiseptica	Bordetella bronchiseptica
nam	N.profundicola	Nautilia profundicola		bpa	B.parapertussis	Bordetella parapertussis
tdn	T.denitrificans_ATCC33889	Sulfurimonas denitrificans		eco	E.coli	Escherichia coli K-12 MG1655
				gka	G.kaustophilus	Geobacillus kaustophilus
				hpa	H.pylori_HPAG1	Helicobacter pylori HPAG1
				lil	L.interrogans	Leptospira interrogans serovar lai
				lin	L.innocua	Listeria innocua
				lpf	L.pneumophila_Lens	Legionella pneumophila Lens
				mxa	M.xanthus	Myxococcus xanthus
				ngo	N.gonorrhoeae	Neisseria gonorrhoeae FA 1090
				sme	S.meliloti	Sinorhizobium meliloti
				son	S.oneidensis	Shewanella oneidensis
				ssp	S.saprophyticus	Staphylococcus saprophyticus

## Sheet: Hydrogen
Positive Instances (Hydrogen Producing Organisms)				Negative Instances (Non-Hydrogen Producing Organisms)
KEGG ID	Organism Name			KEGG ID	Organism Name
	Short	Full			Short	Full
ana	Anabaena	Anabaena sp. PCC7120		abn	A.baumannii_AB0057	Acinetobacter baumannii AB0057
ava	A.variabilis	Anabaena variabilis		aci	Acinetobacter_ADP1	Acinetobacter sp. ADP1
bli	B.licheniformis	Bacillus licheniformis ATCC 14580		bad	B.adolescentis	Bifidobacterium adolescentis
cac	C.acetobutylicum	Clostridium acetobutylicum		bbr	B.bronchiseptica	Bordetella bronchiseptica
cau	C.aurantiacus	Chloroflexus aurantiacus		blo	B.longum	Bifidobacterium longum NCC2705
cbe	C.beijerinckii	Clostridium beijerinckii		dal	D.alkenivorans	Desulfatibacillum alkenivorans
cpf	C.perfringens_ATCC13124	Clostridium perfringens ATCC 13124		dat	D.autotrophicum	Desulfobacterium autotrophicum
cre	C.reinhardtii	Chlamydomonas reinhardtii		lac	L.acidophilus	Lactobacillus acidophilus
csc	C.saccharolyticus	Caldicellulosiruptor saccharolyticus		lca	L.casei	Lactobacillus casei ATCC 334
cth	C.thermocellum	Clostridium thermocellum		sab	S.aureus_RF122	Staphylococcus aureus RF122
eco	E.coli	Escherichia coli K-12 MG1655		vco	V.cholerae_O395	Vibrio cholerae O395
naz	N.azollae	Anabaena azollae 0708
rcp	R.capsulatus	Rhodobacter capsulatus
rpa	R.palustris	Rhodopseudomonas palustris CGA009
rru	R.rubrum	Rhodospirillum rubrum
rsk	R.sphaeroides_KD131	Rhodobacter sphaeroides KD131
tna	T.neapolitana	Thermotoga neapolitana

## Sheet: Dark Ferm.
Positive Instances (Dark Fermentative Hydrogen Producing Organisms)				Negative Instances (Non-Hydrogen Producing Organisms)
KEGG ID	Organism Name			KEGG ID	Organism Name
	Short	Full			Short	Full
bli	B.licheniformis	Bacillus licheniformis ATCC 14580		abn	A.baumannii_AB0057	Acinetobacter baumannii AB0057
cac	C.acetobutylicum	Clostridium acetobutylicum		aci	Acinetobacter_ADP1	Acinetobacter sp. ADP1
cbe	C.beijerinckii	Clostridium beijerinckii		bad	B.adolescentis	Bifidobacterium adolescentis
cpf	C.perfringens_ATCC13124	Clostridium perfringens ATCC 13124		bbr	B.bronchiseptica	Bordetella bronchiseptica
csc	C.saccharolyticus	Caldicellulosiruptor saccharolyticus		blo	B.longum	Bifidobacterium longum NCC2705
cth	C.thermocellum	Clostridium thermocellum		dal	D.alkenivorans	Desulfatibacillum alkenivorans
eco	E.coli	Escherichia coli K-12 MG1655		dat	D.autotrophicum	Desulfobacterium autotrophicum
tna	T.neapolitana	Thermotoga neapolitana		lac	L.acidophilus	Lactobacillus acidophilus
				lca	L.casei	Lactobacillus casei ATCC 334
				sab	S.aureus_RF122	Staphylococcus aureus RF122
				vco	V.cholerae_O395	Vibrio cholerae O395

## Sheet: Light Ferm.
Positive Instances (Light Fermentative Hydrogen Producing Organisms)				Negative Instances (Non-Hydrogen Producing Organisms)
KEGG ID	Organism Name			KEGG ID	Organism Name
	Short	Full			Short	Full
cau	C.aurantiacus	Chloroflexus aurantiacus		abn	A.baumannii_AB0057	Acinetobacter baumannii AB0057
rcp	R.capsulatus	Rhodobacter capsulatus		aci	Acinetobacter_ADP1	Acinetobacter sp. ADP1
rpa	R.palustris	Rhodopseudomonas palustris CGA009		bad	B.adolescentis	Bifidobacterium adolescentis
rru	R.rubrum	Rhodospirillum rubrum		bbr	B.bronchiseptica	Bordetella bronchiseptica
rsk	R.sphaeroides_KD131	Rhodobacter sphaeroides KD131		blo	B.longum	Bifidobacterium longum NCC2705
				dal	D.alkenivorans	Desulfatibacillum alkenivorans
				dat	D.autotrophicum	Desulfobacterium autotrophicum
				lac	L.acidophilus	Lactobacillus acidophilus
				lca	L.casei	Lactobacillus casei ATCC 334
				sab	S.aureus_RF122	Staphylococcus aureus RF122
				vco	V.cholerae_O395	Vibrio cholerae O395

## Sheet: Biophotolysis
Positive Instances (Biophotolysis Hydrogen Producing Organisms)				Negative Instances (Non-Hydrogen Producing Organisms)
KEGG ID	Organism Name			KEGG ID	Organism Name
	Short	Full			Short	Full
ana	Anabaena	Anabaena sp. PCC7120		abn	A.baumannii_AB0057	Acinetobacter baumannii AB0057
ava	A.variabilis	Anabaena variabilis		aci	Acinetobacter_ADP1	Acinetobacter sp. ADP1
cre	C.reinhardtii	Chlamydomonas reinhardtii		bad	B.adolescentis	Bifidobacterium adolescentis
naz	N.azollae	Anabaena azollae 0708		bbr	B.bronchiseptica	Bordetella bronchiseptica
				blo	B.longum	Bifidobacterium longum NCC2705
				dal	D.alkenivorans	Desulfatibacillum alkenivorans
				dat	D.autotrophicum	Desulfobacterium autotrophicum
				lac	L.acidophilus	Lactobacillus acidophilus
				lca	L.casei	Lactobacillus casei ATCC 334
				sab	S.aureus_RF122	Staphylococcus aureus RF122
				vco	V.cholerae_O395	Vibrio cholerae O395

## Sheet: Acid-tolerance
		Positive Instances ()						Negative Instances ()
		KEGG ID	Organism Name					KEGG ID	Organism Name
			Full						Full
		cac	Clostridium acetobutylicum ATCC 824					bha	Bacillus halodurans C-125
		cbe	Clostridium beijerinckii					oih	Oceanobacillus iheyensis HTE831
		cpf	Clostridium perfringens ATCC 13124					amt	Alkaliphilus metalliredigens QYMF
		lca	Lactobacillus casei ATCC 334					aeh	Alkalilimnicola ehrlichei MLHE-1
		lpl	Lactobacillus plantarum WCFS1					bcl	Bacillus clausii KSM-K16
		lme	Leuconostoc mesenteroides subsp. mesenteroides ATCC 8293
		smu	Streptococcus mutans
		ppe	Pediococcus pentosaceus ATCC 25745

[truncated: 1 more sheets: KEGG-Org-ID-Name-Map]
