# Supplementary material for: NIBBS-Search for Fast and Accurate Prediction of Phenotype-Biased Metabolic Systems
Source: PLoS Comput Biol. 2012 May 10;8(5):e1002490. doi: 10.1371/journal.pcbi.1002490 (PMC3349732; doi:10.1371/journal.pcbi.1002490)
Supplement: Table S17 — NIBBS-Search results for TCA versus rTCA expression. This file consists for NIBBS-Search results when using TCA expression as target phenotype and rTCA expressing organisms set was used as the “negative set.” (TXT) [file pcbi.1002490.s017.txt]

Subsystem ID	Bias Score	Edge Type	Compound ID	Compound Name	Compound ID	Compound Name	EC Number	Enzyme Name	Pathway IDs	Pathway Names	Positive Instances																Negative Instances
Subsystem 1	3.7526972511492634E-4										bbr	ssp	mxa	lil		lin	eco	son		bba	bpa	bbr	gka	lpf	ngo	sme
		i	C00022	Pyruvate;	C00024	Acetyl-CoA;	2.3.1.12	dihydrolipoyllysine-residue acetyltransferase;	map00010; map00020; map00620	Glycolysis / Gluconeogenesis; Citrate cycle (TCA cycle); Pyruvate metabolism	bbr	ssp	mxa	lil		lin	eco	son	ama	bba	bpa	bbr	gka	lpf	ngo	sme					hth	nam
		s	C00279	D-Erythrose 4-phosphate	C04691	2-Dehydro-3-deoxy-D-arabino-heptonate 7-phosphate;	2.5.1.54	3-deoxy-7-phosphoheptulonate synthase;	map00400	Phenylalanine, tyrosine and tryptophan biosynthesis	bbr	ssp	mxa	lil	hpa	lin	eco	son		bba	bpa	bbr	gka	lpf	ngo	sme	cte	cli	tdn			nam
		s	C00239	dCMP;	C00705	dCDP;	2.7.4.14	cytidylate kinase;	map00240	Pyrimidine metabolism	bbr	ssp	mxa	lil		lin	eco	son	ama	bba	bpa	bbr	gka	lpf	ngo	sme	cte	cli		aae	hth
		x	C00024	Acetyl-CoA;	C03939	Acetyl-[acyl-carrier protein]	2.3.1.-	<Transferases; Acyltransferases; Transferring groups other than amino-acyl groups>	map00061	Fatty acid biosynthesis	bbr	ssp	mxa	lil	hpa	lin	eco	son		bba	bpa	bbr	gka	lpf	ngo	sme	cte	cli	tdn	aae	hth	nam
		x	C03939	Acetyl-[acyl-carrier protein]	C05744	Acetoacetyl-[acp];	2.3.1.-	<Transferases; Acyltransferases; Transferring groups other than amino-acyl groups>	map00061	Fatty acid biosynthesis	bbr	ssp	mxa	lil	hpa	lin	eco	son		bba	bpa	bbr	gka	lpf	ngo	sme	cte	cli	tdn	aae	hth	nam
		x	C00024	Acetyl-CoA;	C03939	Acetyl-[acyl-carrier protein]	2.3.1.180	beta-ketoacyl-acyl-carrier-protein synthase III;	map00061	Fatty acid biosynthesis	bbr	ssp	mxa	lil	hpa	lin	eco	son	ama	bba	bpa	bbr	gka	lpf	ngo	sme	cte	cli	tdn	aae	hth	nam
		x	C00944	3-Dehydroquinate;	C04691	2-Dehydro-3-deoxy-D-arabino-heptonate 7-phosphate;	4.2.3.4	3-dehydroquinate synthase;	map00400	Phenylalanine, tyrosine and tryptophan biosynthesis	bbr	ssp	mxa	lil	hpa	lin	eco	son		bba	bpa	bbr	gka	lpf	ngo	sme	cte	cli	tdn			nam
		x	C01209	Malonyl-[acyl-carrier protein]	C05744	Acetoacetyl-[acp];	2.3.1.-	<Transferases; Acyltransferases; Transferring groups other than amino-acyl groups>	map00061	Fatty acid biosynthesis	bbr	ssp	mxa	lil	hpa	lin	eco	son		bba	bpa	bbr	gka	lpf	ngo	sme	cte	cli	tdn	aae	hth	nam
		x	C01209	Malonyl-[acyl-carrier protein]	C05750	3-Oxooctanoyl-[acp];	2.3.1.-	<Transferases; Acyltransferases; Transferring groups other than amino-acyl groups>	map00061	Fatty acid biosynthesis	bbr	ssp	mxa	lil	hpa	lin	eco	son		bba	bpa	bbr	gka	lpf	ngo	sme	cte	cli	tdn	aae	hth	nam
		x	C01209	Malonyl-[acyl-carrier protein]	C05762	3-Oxohexadecanoyl-[acp];	2.3.1.-	<Transferases; Acyltransferases; Transferring groups other than amino-acyl groups>	map00061	Fatty acid biosynthesis	bbr	ssp	mxa	lil	hpa	lin	eco	son		bba	bpa	bbr	gka	lpf	ngo	sme	cte	cli	tdn	aae	hth	nam
		x	C04633	(3R)-3-Hydroxypalmitoyl-[acyl-carrier protein];	C05762	3-Oxohexadecanoyl-[acp];	2.3.1.-	<Transferases; Acyltransferases; Transferring groups other than amino-acyl groups>	map00061	Fatty acid biosynthesis	bbr	ssp	mxa	lil	hpa	lin	eco	son		bba	bpa	bbr	gka	lpf	ngo	sme	cte	cli	tdn	aae	hth	nam
		x	C01209	Malonyl-[acyl-carrier protein]	C05753	3-Oxodecanoyl-[acp];	2.3.1.-	<Transferases; Acyltransferases; Transferring groups other than amino-acyl groups>	map00061	Fatty acid biosynthesis	bbr	ssp	mxa	lil	hpa	lin	eco	son		bba	bpa	bbr	gka	lpf	ngo	sme	cte	cli	tdn	aae	hth	nam
		x	C05752	Octanoyl-[acp];	C05753	3-Oxodecanoyl-[acp];	2.3.1.179	beta-ketoacyl-acyl-carrier-protein synthase II;	map00061	Fatty acid biosynthesis	bbr	ssp	mxa	lil	hpa	lin	eco	son	ama	bba	bpa	bbr	gka	lpf	ngo	sme	cte	cli	tdn	aae	hth	nam
		x	C01209	Malonyl-[acyl-carrier protein]	C05753	3-Oxodecanoyl-[acp];	2.3.1.179	beta-ketoacyl-acyl-carrier-protein synthase II;	map00061	Fatty acid biosynthesis	bbr	ssp	mxa	lil	hpa	lin	eco	son	ama	bba	bpa	bbr	gka	lpf	ngo	sme	cte	cli	tdn	aae	hth	nam
		x	C04620	(3R)-3-Hydroxyoctanoyl-[acyl-carrier protein];	C05750	3-Oxooctanoyl-[acp];	2.3.1.-	<Transferases; Acyltransferases; Transferring groups other than amino-acyl groups>	map00061	Fatty acid biosynthesis	bbr	ssp	mxa	lil	hpa	lin	eco	son		bba	bpa	bbr	gka	lpf	ngo	sme	cte	cli	tdn	aae	hth	nam
		x	C04620	(3R)-3-Hydroxyoctanoyl-[acyl-carrier protein];	C05751	trans-Oct-2-enoyl-[acp];	2.3.1.-	<Transferases; Acyltransferases; Transferring groups other than amino-acyl groups>	map00061	Fatty acid biosynthesis	bbr	ssp	mxa	lil	hpa	lin	eco	son		bba	bpa	bbr	gka	lpf	ngo	sme	cte	cli	tdn	aae	hth	nam
		x	C01209	Malonyl-[acyl-carrier protein]	C05759	3-Oxotetradecanoyl-[acp];	2.3.1.179	beta-ketoacyl-acyl-carrier-protein synthase II;	map00061	Fatty acid biosynthesis	bbr	ssp	mxa	lil	hpa	lin	eco	son	ama	bba	bpa	bbr	gka	lpf	ngo	sme	cte	cli	tdn	aae	hth	nam
		x	C04688	(3R)-3-Hydroxytetradecanoyl-[acyl-carrier protein];	C05759	3-Oxotetradecanoyl-[acp];	2.3.1.-	<Transferases; Acyltransferases; Transferring groups other than amino-acyl groups>	map00061	Fatty acid biosynthesis	bbr	ssp	mxa	lil	hpa	lin	eco	son		bba	bpa	bbr	gka	lpf	ngo	sme	cte	cli	tdn	aae	hth	nam
		x	C05223	Dodecanoyl-[acyl-carrier protein];	C05759	3-Oxotetradecanoyl-[acp];	2.3.1.179	beta-ketoacyl-acyl-carrier-protein synthase II;	map00061	Fatty acid biosynthesis	bbr	ssp	mxa	lil	hpa	lin	eco	son	ama	bba	bpa	bbr	gka	lpf	ngo	sme	cte	cli	tdn	aae	hth	nam
		x	C05749	Hexanoyl-[acp];	C05750	3-Oxooctanoyl-[acp];	2.3.1.179	beta-ketoacyl-acyl-carrier-protein synthase II;	map00061	Fatty acid biosynthesis	bbr	ssp	mxa	lil	hpa	lin	eco	son	ama	bba	bpa	bbr	gka	lpf	ngo	sme	cte	cli	tdn	aae	hth	nam
		x	C05748	trans-Hex-2-enoyl-[acp];	C05749	Hexanoyl-[acp];	2.3.1.-	<Transferases; Acyltransferases; Transferring groups other than amino-acyl groups>	map00061	Fatty acid biosynthesis	bbr	ssp	mxa	lil	hpa	lin	eco	son		bba	bpa	bbr	gka	lpf	ngo	sme	cte	cli	tdn	aae	hth	nam
		x	C01209	Malonyl-[acyl-carrier protein]	C05759	3-Oxotetradecanoyl-[acp];	2.3.1.-	<Transferases; Acyltransferases; Transferring groups other than amino-acyl groups>	map00061	Fatty acid biosynthesis	bbr	ssp	mxa	lil	hpa	lin	eco	son		bba	bpa	bbr	gka	lpf	ngo	sme	cte	cli	tdn	aae	hth	nam
		x	C03939	Acetyl-[acyl-carrier protein]	C05744	Acetoacetyl-[acp];	2.3.1.180	beta-ketoacyl-acyl-carrier-protein synthase III;	map00061	Fatty acid biosynthesis	bbr	ssp	mxa	lil	hpa	lin	eco	son	ama	bba	bpa	bbr	gka	lpf	ngo	sme	cte	cli	tdn	aae	hth	nam
		x	C03939	Acetyl-[acyl-carrier protein]	C05744	Acetoacetyl-[acp];	2.3.1.179	beta-ketoacyl-acyl-carrier-protein synthase II;	map00061	Fatty acid biosynthesis	bbr	ssp	mxa	lil	hpa	lin	eco	son	ama	bba	bpa	bbr	gka	lpf	ngo	sme	cte	cli	tdn	aae	hth	nam
		x	C01209	Malonyl-[acyl-carrier protein]	C05756	3-Oxododecanoyl-[acp];	2.3.1.179	beta-ketoacyl-acyl-carrier-protein synthase II;	map00061	Fatty acid biosynthesis	bbr	ssp	mxa	lil	hpa	lin	eco	son	ama	bba	bpa	bbr	gka	lpf	ngo	sme	cte	cli	tdn	aae	hth	nam
		x	C05755	Decanoyl-[acp];	C05756	3-Oxododecanoyl-[acp];	2.3.1.179	beta-ketoacyl-acyl-carrier-protein synthase II;	map00061	Fatty acid biosynthesis	bbr	ssp	mxa	lil	hpa	lin	eco	son	ama	bba	bpa	bbr	gka	lpf	ngo	sme	cte	cli	tdn	aae	hth	nam
		x	C05754	trans-Dec-2-enoyl-[acp];	C05755	Decanoyl-[acp];	2.3.1.-	<Transferases; Acyltransferases; Transferring groups other than amino-acyl groups>	map00061	Fatty acid biosynthesis	bbr	ssp	mxa	lil	hpa	lin	eco	son		bba	bpa	bbr	gka	lpf	ngo	sme	cte	cli	tdn	aae	hth	nam
		x	C05756	3-Oxododecanoyl-[acp];	C05757	(R)-3-Hydroxydodecanoyl-[acp];	2.3.1.-	<Transferases; Acyltransferases; Transferring groups other than amino-acyl groups>	map00061	Fatty acid biosynthesis	bbr	ssp	mxa	lil	hpa	lin	eco	son		bba	bpa	bbr	gka	lpf	ngo	sme	cte	cli	tdn	aae	hth	nam
		x	C05757	(R)-3-Hydroxydodecanoyl-[acp];	C05758	trans-Dodec-2-enoyl-[acp];	2.3.1.-	<Transferases; Acyltransferases; Transferring groups other than amino-acyl groups>	map00061	Fatty acid biosynthesis	bbr	ssp	mxa	lil	hpa	lin	eco	son		bba	bpa	bbr	gka	lpf	ngo	sme	cte	cli	tdn	aae	hth	nam
		x	C04633	(3R)-3-Hydroxypalmitoyl-[acyl-carrier protein];	C05763	trans-Hexadec-2-enoyl-[acp];	2.3.1.-	<Transferases; Acyltransferases; Transferring groups other than amino-acyl groups>	map00061	Fatty acid biosynthesis	bbr	ssp	mxa	lil	hpa	lin	eco	son		bba	bpa	bbr	gka	lpf	ngo	sme	cte	cli	tdn	aae	hth	nam
		x	C05749	Hexanoyl-[acp];	C05750	3-Oxooctanoyl-[acp];	2.3.1.-	<Transferases; Acyltransferases; Transferring groups other than amino-acyl groups>	map00061	Fatty acid biosynthesis	bbr	ssp	mxa	lil	hpa	lin	eco	son		bba	bpa	bbr	gka	lpf	ngo	sme	cte	cli	tdn	aae	hth	nam
		x	C01209	Malonyl-[acyl-carrier protein]	C05746	3-Oxohexanoyl-[acp];	2.3.1.-	<Transferases; Acyltransferases; Transferring groups other than amino-acyl groups>	map00061	Fatty acid biosynthesis	bbr	ssp	mxa	lil	hpa	lin	eco	son		bba	bpa	bbr	gka	lpf	ngo	sme	cte	cli	tdn	aae	hth	nam
		x	C05746	3-Oxohexanoyl-[acp];	C05747	(R)-3-Hydroxyhexanoyl-[acp];	1.1.1.100	3-oxoacyl-[acyl-carrier-protein] reductase;	map00061	Fatty acid biosynthesis	bbr	ssp	mxa	lil	hpa	lin	eco	son	ama	bba	bpa	bbr	gka	lpf	ngo	sme	cte	cli	tdn	aae	hth	nam
		x	C05755	Decanoyl-[acp];	C05756	3-Oxododecanoyl-[acp];	2.3.1.-	<Transferases; Acyltransferases; Transferring groups other than amino-acyl groups>	map00061	Fatty acid biosynthesis	bbr	ssp	mxa	lil	hpa	lin	eco	son		bba	bpa	bbr	gka	lpf	ngo	sme	cte	cli	tdn	aae	hth	nam
		x	C05747	(R)-3-Hydroxyhexanoyl-[acp];	C05748	trans-Hex-2-enoyl-[acp];	2.3.1.-	<Transferases; Acyltransferases; Transferring groups other than amino-acyl groups>	map00061	Fatty acid biosynthesis	bbr	ssp	mxa	lil	hpa	lin	eco	son		bba	bpa	bbr	gka	lpf	ngo	sme	cte	cli	tdn	aae	hth	nam
		x	C00118	D-Glyceraldehyde 3-phosphate;	C00279	D-Erythrose 4-phosphate	2.2.1.1	transketolase;	map00030; map00710	Pentose phosphate pathway; Carbon fixation in photosynthetic organisms	bbr	ssp	mxa	lil	hpa	lin	eco	son	ama	bba	bpa	bbr	gka	lpf	ngo	sme	cte	cli	tdn	aae	hth	nam
		x	C00118	D-Glyceraldehyde 3-phosphate;	C00231	D-Xylulose 5-phosphate	2.2.1.1	transketolase;	map00030; map00710	Pentose phosphate pathway; Carbon fixation in photosynthetic organisms	bbr	ssp	mxa	lil	hpa	lin	eco	son	ama	bba	bpa	bbr	gka	lpf	ngo	sme	cte	cli	tdn	aae	hth	nam
		x	C00199	D-Ribulose 5-phosphate	C00231	D-Xylulose 5-phosphate	5.1.3.1	ribulose-phosphate 3-epimerase;	map00030; map00040; map00710	Pentose phosphate pathway; Pentose and glucuronate interconversions; Carbon fixation in photosynthetic organisms	bbr	ssp	mxa	lil	hpa	lin	eco	son	ama	bba	bpa	bbr	gka	lpf	ngo	sme	cte	cli	tdn	aae	hth	nam
		x	C00231	D-Xylulose 5-phosphate	C05345	beta-D-Fructose 6-phosphate	2.2.1.1	transketolase;	map00030	Pentose phosphate pathway	bbr	ssp	mxa	lil	hpa	lin	eco	son	ama	bba	bpa	bbr	gka	lpf	ngo	sme	cte	cli	tdn	aae	hth	nam
		x	C00668	alpha-D-Glucose 6-phosphate	C05345	beta-D-Fructose 6-phosphate	5.3.1.9	glucose-6-phosphate isomerase;	map00010; map00030; map00500; map00520	Glycolysis / Gluconeogenesis; Pentose phosphate pathway; Starch and sucrose metabolism; Amino sugar and nucleotide sugar metabolism	bbr	ssp	mxa	lil	hpa	lin	eco	son		bba	bpa	bbr	gka	lpf	ngo	sme	cte	cli	tdn	aae	hth	nam
		x	C00118	D-Glyceraldehyde 3-phosphate;	C00236	3-Phospho-D-glyceroyl phosphate;	1.2.1.12	glyceraldehyde-3-phosphate dehydrogenase (phosphorylating);	map00010	Glycolysis / Gluconeogenesis	bbr	ssp	mxa	lil	hpa	lin	eco	son	ama	bba	bpa	bbr	gka	lpf	ngo	sme	cte	cli	tdn	aae	hth	nam
		x	C00231	D-Xylulose 5-phosphate	C05382	Sedoheptulose 7-phosphate;	2.2.1.1	transketolase;	map00030; map00710	Pentose phosphate pathway; Carbon fixation in photosynthetic organisms	bbr	ssp	mxa	lil	hpa	lin	eco	son	ama	bba	bpa	bbr	gka	lpf	ngo	sme	cte	cli	tdn	aae	hth	nam
		x	C01209	Malonyl-[acyl-carrier protein]	C05746	3-Oxohexanoyl-[acp];	2.3.1.179	beta-ketoacyl-acyl-carrier-protein synthase II;	map00061	Fatty acid biosynthesis	bbr	ssp	mxa	lil	hpa	lin	eco	son	ama	bba	bpa	bbr	gka	lpf	ngo	sme	cte	cli	tdn	aae	hth	nam
		x	C04688	(3R)-3-Hydroxytetradecanoyl-[acyl-carrier protein];	C05760	trans-Tetradec-2-enoyl-[acp];	2.3.1.-	<Transferases; Acyltransferases; Transferring groups other than amino-acyl groups>	map00061	Fatty acid biosynthesis	bbr	ssp	mxa	lil	hpa	lin	eco	son		bba	bpa	bbr	gka	lpf	ngo	sme	cte	cli	tdn	aae	hth	nam
		x	C05760	trans-Tetradec-2-enoyl-[acp];	C05761	Tetradecanoyl-[acp];	2.3.1.-	<Transferases; Acyltransferases; Transferring groups other than amino-acyl groups>	map00061	Fatty acid biosynthesis	bbr	ssp	mxa	lil	hpa	lin	eco	son		bba	bpa	bbr	gka	lpf	ngo	sme	cte	cli	tdn	aae	hth	nam
		x	C05751	trans-Oct-2-enoyl-[acp];	C05752	Octanoyl-[acp];	2.3.1.-	<Transferases; Acyltransferases; Transferring groups other than amino-acyl groups>	map00061	Fatty acid biosynthesis	bbr	ssp	mxa	lil	hpa	lin	eco	son		bba	bpa	bbr	gka	lpf	ngo	sme	cte	cli	tdn	aae	hth	nam
		x	C00668	alpha-D-Glucose 6-phosphate	C01172	beta-D-Glucose 6-phosphate	5.3.1.9	glucose-6-phosphate isomerase;	map00010; map00030; map00500	Glycolysis / Gluconeogenesis; Pentose phosphate pathway; Starch and sucrose metabolism	bbr	ssp	mxa	lil	hpa	lin	eco	son		bba	bpa	bbr	gka	lpf	ngo	sme	cte	cli	tdn	aae	hth	nam
		x	C00022	Pyruvate;	C05125	2-(alpha-Hydroxyethyl)thiamine diphosphate;	1.2.4.1	pyruvate dehydrogenase (acetyl-transferring);	map00010; map00020; map00290; map00620; map00650	Glycolysis / Gluconeogenesis; Citrate cycle (TCA cycle); Valine, leucine and isoleucine biosynthesis; Pyruvate metabolism; Butanoate metabolism	bbr	ssp	mxa	lil		lin	eco	son	ama	bba	bpa	bbr	gka	lpf	ngo	sme					hth	nam
		x	C01209	Malonyl-[acyl-carrier protein]	C05744	Acetoacetyl-[acp];	2.3.1.179	beta-ketoacyl-acyl-carrier-protein synthase II;	map00061	Fatty acid biosynthesis	bbr	ssp	mxa	lil	hpa	lin	eco	son	ama	bba	bpa	bbr	gka	lpf	ngo	sme	cte	cli	tdn	aae	hth	nam
		x	C00022	Pyruvate;	C00074	Phosphoenolpyruvate;	2.7.1.40	pyruvate kinase;	map00010; map00620; map00710	Glycolysis / Gluconeogenesis; Pyruvate metabolism; Carbon fixation in photosynthetic organisms	bbr	ssp	mxa	lil		lin	eco	son		bba	bpa	bbr	gka	lpf	ngo	sme						nam
		x	C00458	dCTP;	C00705	dCDP;	2.7.4.6	nucleoside-diphosphate kinase;	map00240	Pyrimidine metabolism	bbr	ssp	mxa	lil	hpa	lin	eco	son	ama	bba	bpa	bbr	gka	lpf	ngo	sme	cte	cli	tdn	aae	hth	nam
		x	C00039	DNA;	C00458	dCTP;	2.7.7.7	DNA-directed DNA polymerase;	map00240	Pyrimidine metabolism	bbr	ssp	mxa	lil	hpa	lin	eco	son	ama	bba	bpa	bbr	gka	lpf	ngo	sme	cte	cli	tdn	aae	hth	nam
		x	C00039	DNA;	C00286	dGTP;	2.7.7.7	DNA-directed DNA polymerase;	map00230	Purine metabolism	bbr	ssp	mxa	lil	hpa	lin	eco	son	ama	bba	bpa	bbr	gka	lpf	ngo	sme	cte	cli	tdn	aae	hth	nam
		x	C00286	dGTP;	C00361	dGDP;	2.7.1.40	pyruvate kinase;	map00230	Purine metabolism	bbr	ssp	mxa	lil		lin	eco	son		bba	bpa	bbr	gka	lpf	ngo	sme						nam
		x	C00039	DNA;	C00459	dTTP;	2.7.7.7	DNA-directed DNA polymerase;	map00240	Pyrimidine metabolism	bbr	ssp	mxa	lil	hpa	lin	eco	son	ama	bba	bpa	bbr	gka	lpf	ngo	sme	cte	cli	tdn	aae	hth	nam
		x	C00363	dTDP;	C00459	dTTP;	2.7.4.6	nucleoside-diphosphate kinase;	map00240	Pyrimidine metabolism	bbr	ssp	mxa	lil	hpa	lin	eco	son	ama	bba	bpa	bbr	gka	lpf	ngo	sme	cte	cli	tdn	aae	hth	nam
		x	C00363	dTDP;	C00364	dTMP;	2.7.4.9	dTMP kinase;	map00240	Pyrimidine metabolism	bbr	ssp	mxa	lil	hpa	lin	eco	son	ama	bba	bpa	bbr	gka	lpf	ngo	sme	cte	cli	tdn	aae	hth	nam
		x	C01209	Malonyl-[acyl-carrier protein]	C05756	3-Oxododecanoyl-[acp];	2.3.1.-	<Transferases; Acyltransferases; Transferring groups other than amino-acyl groups>	map00061	Fatty acid biosynthesis	bbr	ssp	mxa	lil	hpa	lin	eco	son		bba	bpa	bbr	gka	lpf	ngo	sme	cte	cli	tdn	aae	hth	nam
		x	C01209	Malonyl-[acyl-carrier protein]	C05750	3-Oxooctanoyl-[acp];	2.3.1.179	beta-ketoacyl-acyl-carrier-protein synthase II;	map00061	Fatty acid biosynthesis	bbr	ssp	mxa	lil	hpa	lin	eco	son	ama	bba	bpa	bbr	gka	lpf	ngo	sme	cte	cli	tdn	aae	hth	nam
		x	C00024	Acetyl-CoA;	C00158	Citrate;	2.3.3.1	citrate (Si)-synthase;	map00020; map00630	Citrate cycle (TCA cycle); Glyoxylate and dicarboxylate metabolism	bbr	ssp	mxa	lil	hpa	lin	eco	son	ama	bba	bpa	bbr	gka	lpf	ngo	sme	cte	cli	tdn	aae	hth
		x	C00158	Citrate;	C00417	cis-Aconitate;	4.2.1.3	aconitate hydratase;	map00020; map00630; map00720	Citrate cycle (TCA cycle); Glyoxylate and dicarboxylate metabolism; Reductive carboxylate cycle (CO2 fixation)	bbr	ssp	mxa	lil	hpa	lin	eco	son	ama	bba	bpa	bbr	gka	lpf	ngo	sme	cte	cli	tdn	aae	hth	nam
		x	C00022	Pyruvate;	C00024	Acetyl-CoA;	1.8.1.4	dihydrolipoyl dehydrogenase;	map00010; map00020; map00620	Glycolysis / Gluconeogenesis; Citrate cycle (TCA cycle); Pyruvate metabolism	bbr	ssp	mxa	lil		lin	eco	son	ama	bba	bpa	bbr	gka	lpf	ngo	sme	cte	cli		aae	hth	nam
		x	C00036	Oxaloacetate;	C00158	Citrate;	2.3.3.1	citrate (Si)-synthase;	map00020; map00630	Citrate cycle (TCA cycle); Glyoxylate and dicarboxylate metabolism	bbr	ssp	mxa	lil	hpa	lin	eco	son	ama	bba	bpa	bbr	gka	lpf	ngo	sme	cte	cli	tdn	aae	hth
		x	C00197	3-Phospho-D-glycerate;	C00236	3-Phospho-D-glyceroyl phosphate;	2.7.2.3	phosphoglycerate kinase;	map00010; map00710	Glycolysis / Gluconeogenesis; Carbon fixation in photosynthetic organisms	bbr	ssp	mxa	lil	hpa	lin	eco	son	ama	bba	bpa	bbr	gka	lpf	ngo	sme	cte	cli	tdn	aae	hth	nam
		x	C00197	3-Phospho-D-glycerate;	C00631	2-Phospho-D-glycerate;	5.4.2.1	phosphoglycerate mutase;	map00010	Glycolysis / Gluconeogenesis	bbr	ssp	mxa	lil	hpa	lin	eco	son	ama	bba	bpa	bbr	gka	lpf	ngo	sme	cte	cli	tdn	aae	hth	nam
		x	C01172	beta-D-Glucose 6-phosphate	C05345	beta-D-Fructose 6-phosphate	5.3.1.9	glucose-6-phosphate isomerase;	map00010; map00030; map00500	Glycolysis / Gluconeogenesis; Pentose phosphate pathway; Starch and sucrose metabolism	bbr	ssp	mxa	lil	hpa	lin	eco	son		bba	bpa	bbr	gka	lpf	ngo	sme	cte	cli	tdn	aae	hth	nam
		x	C01209	Malonyl-[acyl-carrier protein]	C05744	Acetoacetyl-[acp];	2.3.1.180	beta-ketoacyl-acyl-carrier-protein synthase III;	map00061	Fatty acid biosynthesis	bbr	ssp	mxa	lil	hpa	lin	eco	son	ama	bba	bpa	bbr	gka	lpf	ngo	sme	cte	cli	tdn	aae	hth	nam
		x	C00035	GDP;	C00361	dGDP;	1.17.4.1	ribonucleoside-diphosphate reductase;	map00230	Purine metabolism	bbr	ssp	mxa	lil	hpa	lin	eco	son	ama	bba	bpa	bbr	gka	lpf	ngo	sme	cte	cli	tdn	aae	hth	nam
		x	C00035	GDP;	C00144	GMP;	2.7.4.8	guanylate kinase;	map00230	Purine metabolism	bbr	ssp	mxa	lil	hpa	lin	eco	son	ama	bba	bpa	bbr	gka	lpf	ngo	sme	cte	cli	tdn	aae	hth	nam
		x	C00286	dGTP;	C00361	dGDP;	2.7.4.6	nucleoside-diphosphate kinase;	map00230	Purine metabolism	bbr	ssp	mxa	lil	hpa	lin	eco	son	ama	bba	bpa	bbr	gka	lpf	ngo	sme	cte	cli	tdn	aae	hth	nam
		x	C00118	D-Glyceraldehyde 3-phosphate;	C05378	beta-D-Fructose 1,6-bisphosphate	4.1.2.13	fructose-bisphosphate aldolase;	map00010; map00030; map00051	Glycolysis / Gluconeogenesis; Pentose phosphate pathway; Fructose and mannose metabolism	bbr	ssp	mxa	lil	hpa	lin	eco	son	ama	bba	bpa	bbr	gka	lpf	ngo	sme	cte	cli	tdn	aae	hth	nam
		x	C00117	D-Ribose 5-phosphate;	C00118	D-Glyceraldehyde 3-phosphate;	2.2.1.1	transketolase;	map00030; map00710	Pentose phosphate pathway; Carbon fixation in photosynthetic organisms	bbr	ssp	mxa	lil	hpa	lin	eco	son	ama	bba	bpa	bbr	gka	lpf	ngo	sme	cte	cli	tdn	aae	hth	nam
		x	C00117	D-Ribose 5-phosphate;	C00119	5-Phospho-alpha-D-ribose 1-diphosphate;	2.7.6.1	ribose-phosphate diphosphokinase;	map00030; map00230	Pentose phosphate pathway; Purine metabolism	bbr	ssp	mxa	lil	hpa	lin	eco	son	ama	bba	bpa	bbr	gka	lpf	ngo	sme	cte	cli	tdn	aae	hth	nam
		x	C00119	5-Phospho-alpha-D-ribose 1-diphosphate;	C03090	5-Phosphoribosylamine;	2.4.2.14	amidophosphoribosyltransferase;	map00230	Purine metabolism	bbr	ssp	mxa	lil		lin	eco	son	ama	bba	bpa	bbr	gka	lpf	ngo	sme	cte	cli	tdn	aae	hth	nam
		x	C03090	5-Phosphoribosylamine;	C03838	5'-Phosphoribosylglycinamide;	6.3.4.13	phosphoribosylamine---glycine ligase;	map00230	Purine metabolism	bbr	ssp	mxa	lil	hpa	lin	eco	son	ama	bba	bpa	bbr	gka	lpf	ngo	sme	cte	cli	tdn	aae	hth	nam
		x	C00035	GDP;	C00044	GTP;	2.7.4.6	nucleoside-diphosphate kinase;	map00230	Purine metabolism	bbr	ssp	mxa	lil	hpa	lin	eco	son	ama	bba	bpa	bbr	gka	lpf	ngo	sme	cte	cli	tdn	aae	hth	nam
		x	C05746	3-Oxohexanoyl-[acp];	C05747	(R)-3-Hydroxyhexanoyl-[acp];	2.3.1.-	<Transferases; Acyltransferases; Transferring groups other than amino-acyl groups>	map00061	Fatty acid biosynthesis	bbr	ssp	mxa	lil	hpa	lin	eco	son		bba	bpa	bbr	gka	lpf	ngo	sme	cte	cli	tdn	aae	hth	nam
		x	C00364	dTMP;	C00365	dUMP;	2.1.1.45	thymidylate synthase;	map00240	Pyrimidine metabolism	bbr	ssp	mxa	lil		lin	eco	son		bba	bpa	bbr	gka	lpf	ngo	sme
		x	C00365	dUMP;	C01346	dUDP;	2.7.4.9	dTMP kinase;	map00240	Pyrimidine metabolism	bbr	ssp	mxa	lil	hpa	lin	eco	son	ama	bba	bpa	bbr	gka	lpf	ngo	sme	cte	cli	tdn	aae	hth	nam
		x	C00460	dUTP;	C01346	dUDP;	2.7.4.6	nucleoside-diphosphate kinase;	map00240	Pyrimidine metabolism	bbr	ssp	mxa	lil	hpa	lin	eco	son	ama	bba	bpa	bbr	gka	lpf	ngo	sme	cte	cli	tdn	aae	hth	nam
		x	C00044	GTP;	C00046	RNA;	2.7.7.6	DNA-directed RNA polymerase;	map00230	Purine metabolism	bbr	ssp	mxa	lil	hpa	lin	eco	son	ama	bba	bpa	bbr	gka	lpf	ngo	sme	cte	cli	tdn	aae	hth	nam
		x	C00002	ATP;	C00046	RNA;	2.7.7.6	DNA-directed RNA polymerase;	map00230	Purine metabolism	bbr	ssp	mxa	lil	hpa	lin	eco	son	ama	bba	bpa	bbr	gka	lpf	ngo	sme	cte	cli	tdn	aae	hth	nam
		x	C04619	(3R)-3-Hydroxydecanoyl-[acyl-carrier protein];	C05753	3-Oxodecanoyl-[acp];	1.1.1.100	3-oxoacyl-[acyl-carrier-protein] reductase;	map00061	Fatty acid biosynthesis	bbr	ssp	mxa	lil	hpa	lin	eco	son	ama	bba	bpa	bbr	gka	lpf	ngo	sme	cte	cli	tdn	aae	hth	nam
		x	C00022	Pyruvate;	C00024	Acetyl-CoA;	1.2.4.1	pyruvate dehydrogenase (acetyl-transferring);	map00010; map00020; map00290; map00620; map00650	Glycolysis / Gluconeogenesis; Citrate cycle (TCA cycle); Valine, leucine and isoleucine biosynthesis; Pyruvate metabolism; Butanoate metabolism	bbr	ssp	mxa	lil		lin	eco	son	ama	bba	bpa	bbr	gka	lpf	ngo	sme					hth	nam
		x	C00046	RNA;	C00063	CTP;	2.7.7.6	DNA-directed RNA polymerase;	map00240	Pyrimidine metabolism	bbr	ssp	mxa	lil	hpa	lin	eco	son	ama	bba	bpa	bbr	gka	lpf	ngo	sme	cte	cli	tdn	aae	hth	nam
		x	C00063	CTP;	C00075	UTP;	6.3.4.2	CTP synthase;	map00240	Pyrimidine metabolism	bbr	ssp	mxa	lil	hpa	lin	eco	son	ama	bba	bpa	bbr	gka	lpf	ngo	sme	cte	cli	tdn	aae	hth	nam
		x	C00063	CTP;	C00112	CDP;	2.7.4.6	nucleoside-diphosphate kinase;	map00240	Pyrimidine metabolism	bbr	ssp	mxa	lil	hpa	lin	eco	son	ama	bba	bpa	bbr	gka	lpf	ngo	sme	cte	cli	tdn	aae	hth	nam
		x	C00055	CMP;	C00112	CDP;	2.7.4.14	cytidylate kinase;	map00240	Pyrimidine metabolism	bbr	ssp	mxa	lil		lin	eco	son	ama	bba	bpa	bbr	gka	lpf	ngo	sme	cte	cli		aae	hth
		x	C00074	Phosphoenolpyruvate;	C04691	2-Dehydro-3-deoxy-D-arabino-heptonate 7-phosphate;	2.5.1.54	3-deoxy-7-phosphoheptulonate synthase;	map00400	Phenylalanine, tyrosine and tryptophan biosynthesis	bbr	ssp	mxa	lil	hpa	lin	eco	son		bba	bpa	bbr	gka	lpf	ngo	sme	cte	cli	tdn			nam
		x	C01209	Malonyl-[acyl-carrier protein]	C05762	3-Oxohexadecanoyl-[acp];	2.3.1.179	beta-ketoacyl-acyl-carrier-protein synthase II;	map00061	Fatty acid biosynthesis	bbr	ssp	mxa	lil	hpa	lin	eco	son	ama	bba	bpa	bbr	gka	lpf	ngo	sme	cte	cli	tdn	aae	hth	nam
		x	C00015	UDP;	C00075	UTP;	2.7.4.6	nucleoside-diphosphate kinase;	map00240	Pyrimidine metabolism	bbr	ssp	mxa	lil	hpa	lin	eco	son	ama	bba	bpa	bbr	gka	lpf	ngo	sme	cte	cli	tdn	aae	hth	nam
		x	C00015	UDP;	C00105	UMP;	2.7.4.14	cytidylate kinase;	map00240	Pyrimidine metabolism	bbr	ssp	mxa	lil		lin	eco	son	ama	bba	bpa	bbr	gka	lpf	ngo	sme	cte	cli		aae	hth
		x	C00105	UMP;	C01103	Orotidine 5'-phosphate;	4.1.1.23	orotidine-5'-phosphate decarboxylase;	map00240	Pyrimidine metabolism	bbr	ssp	mxa	lil	hpa	lin	eco	son	ama	bba	bpa	bbr	gka	lpf	ngo	sme	cte	cli	tdn	aae	hth	nam
		x	C04619	(3R)-3-Hydroxydecanoyl-[acyl-carrier protein];	C05754	trans-Dec-2-enoyl-[acp];	2.3.1.-	<Transferases; Acyltransferases; Transferring groups other than amino-acyl groups>	map00061	Fatty acid biosynthesis	bbr	ssp	mxa	lil	hpa	lin	eco	son		bba	bpa	bbr	gka	lpf	ngo	sme	cte	cli	tdn	aae	hth	nam
		x	C00119	5-Phospho-alpha-D-ribose 1-diphosphate;	C01103	Orotidine 5'-phosphate;	2.4.2.10	orotate phosphoribosyltransferase;	map00240	Pyrimidine metabolism	bbr	ssp	mxa	lil	hpa	lin	eco	son	ama	bba	bpa	bbr	gka	lpf	ngo	sme	cte	cli	tdn	aae	hth	nam
		x	C00039	DNA;	C00131	dATP;	2.7.7.7	DNA-directed DNA polymerase;	map00230	Purine metabolism	bbr	ssp	mxa	lil	hpa	lin	eco	son	ama	bba	bpa	bbr	gka	lpf	ngo	sme	cte	cli	tdn	aae	hth	nam
		x	C00131	dATP;	C00206	dADP;	2.7.1.40	pyruvate kinase;	map00230	Purine metabolism	bbr	ssp	mxa	lil		lin	eco	son		bba	bpa	bbr	gka	lpf	ngo	sme						nam
		x	C00206	dADP;	C00360	dAMP;	2.7.4.3	adenylate kinase;	map00230	Purine metabolism	bbr	ssp	mxa	lil	hpa	lin	eco	son	ama	bba	bpa	bbr	gka	lpf	ngo	sme	cte	cli	tdn	aae	hth	nam
		x	C00008	ADP;	C00206	dADP;	1.17.4.1	ribonucleoside-diphosphate reductase;	map00230	Purine metabolism	bbr	ssp	mxa	lil	hpa	lin	eco	son	ama	bba	bpa	bbr	gka	lpf	ngo	sme	cte	cli	tdn	aae	hth	nam
		x	C04633	(3R)-3-Hydroxypalmitoyl-[acyl-carrier protein];	C05762	3-Oxohexadecanoyl-[acp];	1.1.1.100	3-oxoacyl-[acyl-carrier-protein] reductase;	map00061	Fatty acid biosynthesis	bbr	ssp	mxa	lil	hpa	lin	eco	son	ama	bba	bpa	bbr	gka	lpf	ngo	sme	cte	cli	tdn	aae	hth	nam
		x	C00361	dGDP;	C00362	dGMP;	2.7.4.8	guanylate kinase;	map00230	Purine metabolism	bbr	ssp	mxa	lil	hpa	lin	eco	son	ama	bba	bpa	bbr	gka	lpf	ngo	sme	cte	cli	tdn	aae	hth	nam
		x	C05756	3-Oxododecanoyl-[acp];	C05757	(R)-3-Hydroxydodecanoyl-[acp];	1.1.1.100	3-oxoacyl-[acyl-carrier-protein] reductase;	map00061	Fatty acid biosynthesis	bbr	ssp	mxa	lil	hpa	lin	eco	son	ama	bba	bpa	bbr	gka	lpf	ngo	sme	cte	cli	tdn	aae	hth	nam
		x	C04618	(3R)-3-Hydroxybutanoyl-[acyl-carrier protein];	C05744	Acetoacetyl-[acp];	2.3.1.-	<Transferases; Acyltransferases; Transferring groups other than amino-acyl groups>	map00061	Fatty acid biosynthesis	bbr	ssp	mxa	lil	hpa	lin	eco	son		bba	bpa	bbr	gka	lpf	ngo	sme	cte	cli	tdn	aae	hth	nam
		x	C04246	But-2-enoyl-[acyl-carrier protein]	C04618	(3R)-3-Hydroxybutanoyl-[acyl-carrier protein];	2.3.1.-	<Transferases; Acyltransferases; Transferring groups other than amino-acyl groups>	map00061	Fatty acid biosynthesis	bbr	ssp	mxa	lil	hpa	lin	eco	son		bba	bpa	bbr	gka	lpf	ngo	sme	cte	cli	tdn	aae	hth	nam
		x	C04246	But-2-enoyl-[acyl-carrier protein]	C05745	Butyryl-[acp];	2.3.1.-	<Transferases; Acyltransferases; Transferring groups other than amino-acyl groups>	map00061	Fatty acid biosynthesis	bbr	ssp	mxa	lil	hpa	lin	eco	son		bba	bpa	bbr	gka	lpf	ngo	sme	cte	cli	tdn	aae	hth	nam
		x	C00131	dATP;	C00206	dADP;	2.7.4.6	nucleoside-diphosphate kinase;	map00230	Purine metabolism	bbr	ssp	mxa	lil	hpa	lin	eco	son	ama	bba	bpa	bbr	gka	lpf	ngo	sme	cte	cli	tdn	aae	hth	nam
		x	C00352	D-Glucosamine 6-phosphate;	C05345	beta-D-Fructose 6-phosphate	3.5.1.-	<Hydrolases; Acting on carbon-nitrogen bonds, other than peptide bonds; In linear amides>	map00520	Amino sugar and nucleotide sugar metabolism	bbr	ssp	mxa	lil	hpa	lin	eco	son		bba	bpa	bbr	gka	lpf	ngo	sme	cte	cli	tdn	aae	hth	nam
		x	C05745	Butyryl-[acp];	C05746	3-Oxohexanoyl-[acp];	2.3.1.179	beta-ketoacyl-acyl-carrier-protein synthase II;	map00061	Fatty acid biosynthesis	bbr	ssp	mxa	lil	hpa	lin	eco	son	ama	bba	bpa	bbr	gka	lpf	ngo	sme	cte	cli	tdn	aae	hth	nam
		x	C05752	Octanoyl-[acp];	C05753	3-Oxodecanoyl-[acp];	2.3.1.-	<Transferases; Acyltransferases; Transferring groups other than amino-acyl groups>	map00061	Fatty acid biosynthesis	bbr	ssp	mxa	lil	hpa	lin	eco	son		bba	bpa	bbr	gka	lpf	ngo	sme	cte	cli	tdn	aae	hth	nam
		x	C00046	RNA;	C00075	UTP;	2.7.7.6	DNA-directed RNA polymerase;	map00240	Pyrimidine metabolism	bbr	ssp	mxa	lil	hpa	lin	eco	son	ama	bba	bpa	bbr	gka	lpf	ngo	sme	cte	cli	tdn	aae	hth	nam
		x	C00144	GMP;	C00655	Xanthosine 5'-phosphate;	6.3.5.2	GMP synthase (glutamine-hydrolysing);	map00230	Purine metabolism	bbr	ssp	mxa	lil	hpa	lin	eco	son	ama	bba	bpa	bbr	gka	lpf	ngo	sme	cte	cli	tdn	aae	hth	nam
		x	C00130	IMP;	C00655	Xanthosine 5'-phosphate;	1.1.1.205	IMP dehydrogenase;	map00230	Purine metabolism	bbr	ssp	mxa	lil	hpa	lin	eco	son	ama	bba	bpa	bbr	gka	lpf	ngo	sme	cte	cli	tdn	aae	hth	nam
		x	C00130	IMP;	C04734	1-(5'-Phosphoribosyl)-5-formamido-4-imidazolecarboxamide;	3.5.4.10	IMP cyclohydrolase;	map00230	Purine metabolism	bbr	ssp	mxa	lil		lin	eco	son	ama	bba	bpa	bbr	gka	lpf	ngo	sme	cte	cli	tdn	aae	hth	nam
		x	C04677	1-(5'-Phosphoribosyl)-5-amino-4-imidazolecarboxamide;	C04734	1-(5'-Phosphoribosyl)-5-formamido-4-imidazolecarboxamide;	6.3.4.-	<Ligases; Forming carbon-nitrogen bonds; Other carbon--nitrogen ligases>	map00230	Purine metabolism	bbr	ssp	mxa	lil	hpa	lin	eco	son	ama	bba	bpa	bbr	gka	lpf	ngo	sme	cte	cli	tdn	aae	hth	nam
		x	C04677	1-(5'-Phosphoribosyl)-5-amino-4-imidazolecarboxamide;	C04823	1-(5'-Phosphoribosyl)-5-amino-4-(N-succinocarboxamide)-imidazole;	4.3.2.2	adenylosuccinate lyase;	map00230	Purine metabolism	bbr	ssp	mxa	lil	hpa	lin	eco	son	ama	bba	bpa	bbr	gka	lpf	ngo	sme	cte	cli	tdn	aae	hth	nam
		x	C04751	1-(5-Phospho-D-ribosyl)-5-amino-4-imidazolecarboxylate;	C04823	1-(5'-Phosphoribosyl)-5-amino-4-(N-succinocarboxamide)-imidazole;	6.3.2.6	phosphoribosylaminoimidazolesuccinocarboxamide synthase;	map00230	Purine metabolism	bbr	ssp	mxa	lil		lin	eco	son	ama	bba	bpa	bbr	gka	lpf	ngo	sme	cte	cli	tdn	aae	hth	nam
		x	C04751	1-(5-Phospho-D-ribosyl)-5-amino-4-imidazolecarboxylate;	C15667	5-Carboxyamino-1-(5-phospho-D-ribosyl)imidazole	5.4.99.18	5-(carboxyamino)imidazole ribonucleotide mutase;	map00230	Purine metabolism	bbr	ssp	mxa	lil		lin	eco	son	ama	bba	bpa	bbr	gka	lpf	ngo	sme	cte	cli	tdn	aae	hth	nam
		x	C00130	IMP;	C04734	1-(5'-Phosphoribosyl)-5-formamido-4-imidazolecarboxamide;	2.1.2.3	phosphoribosylaminoimidazolecarboxamide formyltransferase;	map00230	Purine metabolism	bbr	ssp	mxa	lil		lin	eco	son	ama	bba	bpa	bbr	gka	lpf	ngo	sme	cte	cli	tdn	aae	hth	nam
		x	C00130	IMP;	C03794	N6-(1,2-Dicarboxyethyl)-AMP;	6.3.4.4	adenylosuccinate synthase;	map00230	Purine metabolism	bbr	ssp	mxa	lil	hpa	lin	eco	son	ama	bba	bpa	bbr	gka	lpf	ngo	sme	cte	cli	tdn	aae	hth	nam
		x	C00020	AMP;	C03794	N6-(1,2-Dicarboxyethyl)-AMP;	4.3.2.2	adenylosuccinate lyase;	map00230	Purine metabolism	bbr	ssp	mxa	lil	hpa	lin	eco	son	ama	bba	bpa	bbr	gka	lpf	ngo	sme	cte	cli	tdn	aae	hth	nam
		x	C04677	1-(5'-Phosphoribosyl)-5-amino-4-imidazolecarboxamide;	C04734	1-(5'-Phosphoribosyl)-5-formamido-4-imidazolecarboxamide;	2.1.2.3	phosphoribosylaminoimidazolecarboxamide formyltransferase;	map00230	Purine metabolism	bbr	ssp	mxa	lil		lin	eco	son	ama	bba	bpa	bbr	gka	lpf	ngo	sme	cte	cli	tdn	aae	hth	nam
		x	C05223	Dodecanoyl-[acyl-carrier protein];	C05758	trans-Dodec-2-enoyl-[acp];	2.3.1.-	<Transferases; Acyltransferases; Transferring groups other than amino-acyl groups>	map00061	Fatty acid biosynthesis	bbr	ssp	mxa	lil	hpa	lin	eco	son		bba	bpa	bbr	gka	lpf	ngo	sme	cte	cli	tdn	aae	hth	nam
		x	C00279	D-Erythrose 4-phosphate	C05345	beta-D-Fructose 6-phosphate	2.2.1.1	transketolase;	map00030	Pentose phosphate pathway	bbr	ssp	mxa	lil	hpa	lin	eco	son	ama	bba	bpa	bbr	gka	lpf	ngo	sme	cte	cli	tdn	aae	hth	nam
		x	C00074	Phosphoenolpyruvate;	C00631	2-Phospho-D-glycerate;	4.2.1.11	phosphopyruvate hydratase;	map00010	Glycolysis / Gluconeogenesis	bbr	ssp	mxa	lil	hpa	lin	eco	son	ama	bba	bpa	bbr	gka	lpf	ngo	sme	cte	cli	tdn	aae	hth	nam
		x	C00002	ATP;	C00008	ADP;	2.7.4.6	nucleoside-diphosphate kinase;	map00230	Purine metabolism	bbr	ssp	mxa	lil	hpa	lin	eco	son	ama	bba	bpa	bbr	gka	lpf	ngo	sme	cte	cli	tdn	aae	hth	nam
		x	C00002	ATP;	C00008	ADP;	2.7.1.40	pyruvate kinase;	map00230	Purine metabolism	bbr	ssp	mxa	lil		lin	eco	son		bba	bpa	bbr	gka	lpf	ngo	sme						nam
		x	C00311	Isocitrate;	C00417	cis-Aconitate;	4.2.1.3	aconitate hydratase;	map00020; map00630; map00720	Citrate cycle (TCA cycle); Glyoxylate and dicarboxylate metabolism; Reductive carboxylate cycle (CO2 fixation)	bbr	ssp	mxa	lil	hpa	lin	eco	son	ama	bba	bpa	bbr	gka	lpf	ngo	sme	cte	cli	tdn	aae	hth	nam
		x	C00117	D-Ribose 5-phosphate;	C05382	Sedoheptulose 7-phosphate;	2.2.1.1	transketolase;	map00030; map00710	Pentose phosphate pathway; Carbon fixation in photosynthetic organisms	bbr	ssp	mxa	lil	hpa	lin	eco	son	ama	bba	bpa	bbr	gka	lpf	ngo	sme	cte	cli	tdn	aae	hth	nam
		x	C00111	Glycerone phosphate;	C00118	D-Glyceraldehyde 3-phosphate;	5.3.1.1	triose-phosphate isomerase;	map00010; map00051; map00562; map00710	Glycolysis / Gluconeogenesis; Fructose and mannose metabolism; Inositol phosphate metabolism; Carbon fixation in photosynthetic organisms	bbr	ssp	mxa	lil	hpa	lin	eco	son	ama	bba	bpa	bbr	gka	lpf	ngo	sme	cte	cli	tdn	aae	hth	nam
		x	C00111	Glycerone phosphate;	C01094	D-Fructose 1-phosphate	4.1.2.13	fructose-bisphosphate aldolase;	map00051	Fructose and mannose metabolism	bbr	ssp	mxa	lil	hpa	lin	eco	son	ama	bba	bpa	bbr	gka	lpf	ngo	sme	cte	cli	tdn	aae	hth	nam
		x	C05761	Tetradecanoyl-[acp];	C05762	3-Oxohexadecanoyl-[acp];	2.3.1.-	<Transferases; Acyltransferases; Transferring groups other than amino-acyl groups>	map00061	Fatty acid biosynthesis	bbr	ssp	mxa	lil	hpa	lin	eco	son		bba	bpa	bbr	gka	lpf	ngo	sme	cte	cli	tdn	aae	hth	nam
		x	C00008	ADP;	C00020	AMP;	2.7.4.3	adenylate kinase;	map00230	Purine metabolism	bbr	ssp	mxa	lil	hpa	lin	eco	son	ama	bba	bpa	bbr	gka	lpf	ngo	sme	cte	cli	tdn	aae	hth	nam
		x	C00111	Glycerone phosphate;	C05378	beta-D-Fructose 1,6-bisphosphate	4.1.2.13	fructose-bisphosphate aldolase;	map00010; map00051	Glycolysis / Gluconeogenesis; Fructose and mannose metabolism	bbr	ssp	mxa	lil	hpa	lin	eco	son	ama	bba	bpa	bbr	gka	lpf	ngo	sme	cte	cli	tdn	aae	hth	nam
		x	C04619	(3R)-3-Hydroxydecanoyl-[acyl-carrier protein];	C05753	3-Oxodecanoyl-[acp];	2.3.1.-	<Transferases; Acyltransferases; Transferring groups other than amino-acyl groups>	map00061	Fatty acid biosynthesis	bbr	ssp	mxa	lil	hpa	lin	eco	son		bba	bpa	bbr	gka	lpf	ngo	sme	cte	cli	tdn	aae	hth	nam
		x	C00352	D-Glucosamine 6-phosphate;	C05345	beta-D-Fructose 6-phosphate	2.6.1.16	glutamine---fructose-6-phosphate transaminase (isomerizing);	map00520	Amino sugar and nucleotide sugar metabolism	bbr	ssp	mxa	lil	hpa	lin	eco	son	ama	bba	bpa	bbr	gka	lpf	ngo	sme	cte	cli	tdn	aae	hth	nam
		x	C00112	CDP;	C00705	dCDP;	1.17.4.1	ribonucleoside-diphosphate reductase;	map00240	Pyrimidine metabolism	bbr	ssp	mxa	lil	hpa	lin	eco	son	ama	bba	bpa	bbr	gka	lpf	ngo	sme	cte	cli	tdn	aae	hth	nam
		x	C04620	(3R)-3-Hydroxyoctanoyl-[acyl-carrier protein];	C05750	3-Oxooctanoyl-[acp];	1.1.1.100	3-oxoacyl-[acyl-carrier-protein] reductase;	map00061	Fatty acid biosynthesis	bbr	ssp	mxa	lil	hpa	lin	eco	son	ama	bba	bpa	bbr	gka	lpf	ngo	sme	cte	cli	tdn	aae	hth	nam
		x	C05223	Dodecanoyl-[acyl-carrier protein];	C05759	3-Oxotetradecanoyl-[acp];	2.3.1.-	<Transferases; Acyltransferases; Transferring groups other than amino-acyl groups>	map00061	Fatty acid biosynthesis	bbr	ssp	mxa	lil	hpa	lin	eco	son		bba	bpa	bbr	gka	lpf	ngo	sme	cte	cli	tdn	aae	hth	nam
		x	C00117	D-Ribose 5-phosphate;	C00199	D-Ribulose 5-phosphate	5.3.1.6	ribose-5-phosphate isomerase;	map00030; map00710	Pentose phosphate pathway; Carbon fixation in photosynthetic organisms	bbr	ssp	mxa	lil	hpa	lin	eco	son	ama	bba	bpa	bbr	gka	lpf	ngo	sme	cte	cli	tdn	aae	hth	nam
		x	C00295	Orotate;	C01103	Orotidine 5'-phosphate;	2.4.2.10	orotate phosphoribosyltransferase;	map00240	Pyrimidine metabolism	bbr	ssp	mxa	lil	hpa	lin	eco	son	ama	bba	bpa	bbr	gka	lpf	ngo	sme	cte	cli	tdn	aae	hth	nam
		x	C00295	Orotate;	C00337	(S)-Dihydroorotate;	1.3.3.1	dihydroorotate oxidase;	map00240	Pyrimidine metabolism	bbr	ssp	mxa	lil	hpa	lin	eco	son	ama	bba	bpa	bbr	gka	lpf	ngo	sme	cte	cli	tdn	aae	hth	nam
		x	C00337	(S)-Dihydroorotate;	C00438	N-Carbamoyl-L-aspartate	3.5.2.3	dihydroorotase;	map00240	Pyrimidine metabolism	bbr	ssp	mxa	lil	hpa	lin	eco	son	ama	bba	bpa	bbr	gka	lpf	ngo	sme	cte	cli	tdn	aae	hth	nam
		x	C00169	Carbamoyl phosphate	C00438	N-Carbamoyl-L-aspartate	2.1.3.2	aspartate carbamoyltransferase;	map00240; map00250	Pyrimidine metabolism; Alanine, aspartate and glutamate metabolism	bbr	ssp	mxa	lil	hpa	lin	eco	son	ama	bba	bpa	bbr	gka	lpf	ngo	sme	cte	cli	tdn	aae	hth	nam
		x	C00064	L-Glutamine;	C00169	Carbamoyl phosphate	6.3.5.5	carbamoyl-phosphate synthase (glutamine-hydrolysing);	map00240; map00250	Pyrimidine metabolism; Alanine, aspartate and glutamate metabolism	bbr	ssp	mxa	lil	hpa	lin	eco	son	ama	bba	bpa	bbr	gka	lpf	ngo	sme	cte	cli	tdn	aae	hth	nam
		x	C00025	L-Glutamate;	C00064	L-Glutamine;	6.3.1.2	glutamate---ammonia ligase;	map00250; map00330; map00910	Alanine, aspartate and glutamate metabolism; Arginine and proline metabolism; Nitrogen metabolism	bbr	ssp	mxa	lil	hpa	lin	eco	son	ama	bba	bpa	bbr	gka	lpf	ngo	sme	cte	cli	tdn	aae	hth	nam
		x	C05763	trans-Hexadec-2-enoyl-[acp];	C05764	Hexadecanoyl-[acp];	2.3.1.-	<Transferases; Acyltransferases; Transferring groups other than amino-acyl groups>	map00061	Fatty acid biosynthesis	bbr	ssp	mxa	lil	hpa	lin	eco	son		bba	bpa	bbr	gka	lpf	ngo	sme	cte	cli	tdn	aae	hth	nam
		x	C00249	Hexadecanoic acid;	C05764	Hexadecanoyl-[acp];	2.3.1.-	<Transferases; Acyltransferases; Transferring groups other than amino-acyl groups>	map00061; map01040	Fatty acid biosynthesis; Biosynthesis of unsaturated fatty acids	bbr	ssp	mxa	lil	hpa	lin	eco	son		bba	bpa	bbr	gka	lpf	ngo	sme	cte	cli	tdn	aae	hth	nam
		x	C03838	5'-Phosphoribosylglycinamide;	C04376	5'-Phosphoribosyl-N-formylglycinamide;	2.1.2.2	phosphoribosylglycinamide formyltransferase;	map00230	Purine metabolism	bbr	ssp	mxa	lil		lin	eco	son	ama	bba	bpa	bbr	gka	lpf	ngo	sme	cte	cli	tdn	aae	hth	nam
		x	C04376	5'-Phosphoribosyl-N-formylglycinamide;	C04640	2-(Formamido)-N1-(5'-phosphoribosyl)acetamidine;	6.3.5.3	phosphoribosylformylglycinamidine synthase;	map00230	Purine metabolism	bbr	ssp	mxa	lil		lin	eco	son	ama	bba	bpa	bbr	gka	lpf	ngo	sme	cte	cli	tdn	aae	hth	nam
		x	C03373	Aminoimidazole ribotide;	C04640	2-(Formamido)-N1-(5'-phosphoribosyl)acetamidine;	6.3.3.1	phosphoribosylformylglycinamidine cyclo-ligase;	map00230	Purine metabolism	bbr	ssp	mxa	lil		lin	eco	son	ama	bba	bpa	bbr	gka	lpf	ngo	sme	cte	cli	tdn	aae	hth	nam
		x	C05745	Butyryl-[acp];	C05746	3-Oxohexanoyl-[acp];	2.3.1.-	<Transferases; Acyltransferases; Transferring groups other than amino-acyl groups>	map00061	Fatty acid biosynthesis	bbr	ssp	mxa	lil	hpa	lin	eco	son		bba	bpa	bbr	gka	lpf	ngo	sme	cte	cli	tdn	aae	hth	nam
		x	C05761	Tetradecanoyl-[acp];	C05762	3-Oxohexadecanoyl-[acp];	2.3.1.179	beta-ketoacyl-acyl-carrier-protein synthase II;	map00061	Fatty acid biosynthesis	bbr	ssp	mxa	lil	hpa	lin	eco	son	ama	bba	bpa	bbr	gka	lpf	ngo	sme	cte	cli	tdn	aae	hth	nam
		x	C04618	(3R)-3-Hydroxybutanoyl-[acyl-carrier protein];	C05744	Acetoacetyl-[acp];	1.1.1.100	3-oxoacyl-[acyl-carrier-protein] reductase;	map00061	Fatty acid biosynthesis	bbr	ssp	mxa	lil	hpa	lin	eco	son	ama	bba	bpa	bbr	gka	lpf	ngo	sme	cte	cli	tdn	aae	hth	nam
Subsystem 2	3.7526972511492634E-4										bbr	ssp	mxa	lil	hpa	lin	eco	son		bba	bpa	bbr	gka	lpf		sme
		i	C00024	Acetyl-CoA;	C00332	Acetoacetyl-CoA;	2.3.1.9	acetyl-CoA C-acetyltransferase;	map00071; map00072; map00280; map00310; map00380; map00620; map00632; map00640; map00650; map00900	Fatty acid metabolism; Synthesis and degradation of ketone bodies; Valine, leucine and isoleucine degradation; Lysine degradation; Tryptophan metabolism; Pyruvate metabolism; Benzoate degradation via CoA ligation; Propanoate metabolism; Butanoate metabolism; Terpenoid backbone biosynthesis	bbr	ssp	mxa	lil	hpa	lin	eco	son		bba	bpa	bbr	gka	lpf		sme
		x	C00024	Acetyl-CoA;	C00158	Citrate;	2.3.3.1	citrate (Si)-synthase;	map00020; map00630	Citrate cycle (TCA cycle); Glyoxylate and dicarboxylate metabolism	bbr	ssp	mxa	lil	hpa	lin	eco	son	ama	bba	bpa	bbr	gka	lpf	ngo	sme	cte	cli	tdn	aae	hth
		x	C00158	Citrate;	C00417	cis-Aconitate;	4.2.1.3	aconitate hydratase;	map00020; map00630; map00720	Citrate cycle (TCA cycle); Glyoxylate and dicarboxylate metabolism; Reductive carboxylate cycle (CO2 fixation)	bbr	ssp	mxa	lil	hpa	lin	eco	son	ama	bba	bpa	bbr	gka	lpf	ngo	sme	cte	cli	tdn	aae	hth	nam
		x	C00024	Acetyl-CoA;	C03939	Acetyl-[acyl-carrier protein]	2.3.1.-	<Transferases; Acyltransferases; Transferring groups other than amino-acyl groups>	map00061	Fatty acid biosynthesis	bbr	ssp	mxa	lil	hpa	lin	eco	son		bba	bpa	bbr	gka	lpf	ngo	sme	cte	cli	tdn	aae	hth	nam
		x	C03939	Acetyl-[acyl-carrier protein]	C05744	Acetoacetyl-[acp];	2.3.1.-	<Transferases; Acyltransferases; Transferring groups other than amino-acyl groups>	map00061	Fatty acid biosynthesis	bbr	ssp	mxa	lil	hpa	lin	eco	son		bba	bpa	bbr	gka	lpf	ngo	sme	cte	cli	tdn	aae	hth	nam
		x	C00036	Oxaloacetate;	C00158	Citrate;	2.3.3.1	citrate (Si)-synthase;	map00020; map00630	Citrate cycle (TCA cycle); Glyoxylate and dicarboxylate metabolism	bbr	ssp	mxa	lil	hpa	lin	eco	son	ama	bba	bpa	bbr	gka	lpf	ngo	sme	cte	cli	tdn	aae	hth
		x	C00024	Acetyl-CoA;	C03939	Acetyl-[acyl-carrier protein]	2.3.1.180	beta-ketoacyl-acyl-carrier-protein synthase III;	map00061	Fatty acid biosynthesis	bbr	ssp	mxa	lil	hpa	lin	eco	son	ama	bba	bpa	bbr	gka	lpf	ngo	sme	cte	cli	tdn	aae	hth	nam
		x	C01209	Malonyl-[acyl-carrier protein]	C05744	Acetoacetyl-[acp];	2.3.1.180	beta-ketoacyl-acyl-carrier-protein synthase III;	map00061	Fatty acid biosynthesis	bbr	ssp	mxa	lil	hpa	lin	eco	son	ama	bba	bpa	bbr	gka	lpf	ngo	sme	cte	cli	tdn	aae	hth	nam
		x	C01209	Malonyl-[acyl-carrier protein]	C05750	3-Oxooctanoyl-[acp];	2.3.1.-	<Transferases; Acyltransferases; Transferring groups other than amino-acyl groups>	map00061	Fatty acid biosynthesis	bbr	ssp	mxa	lil	hpa	lin	eco	son		bba	bpa	bbr	gka	lpf	ngo	sme	cte	cli	tdn	aae	hth	nam
		x	C01209	Malonyl-[acyl-carrier protein]	C05762	3-Oxohexadecanoyl-[acp];	2.3.1.-	<Transferases; Acyltransferases; Transferring groups other than amino-acyl groups>	map00061	Fatty acid biosynthesis	bbr	ssp	mxa	lil	hpa	lin	eco	son		bba	bpa	bbr	gka	lpf	ngo	sme	cte	cli	tdn	aae	hth	nam
		x	C04633	(3R)-3-Hydroxypalmitoyl-[acyl-carrier protein];	C05762	3-Oxohexadecanoyl-[acp];	2.3.1.-	<Transferases; Acyltransferases; Transferring groups other than amino-acyl groups>	map00061	Fatty acid biosynthesis	bbr	ssp	mxa	lil	hpa	lin	eco	son		bba	bpa	bbr	gka	lpf	ngo	sme	cte	cli	tdn	aae	hth	nam
		x	C01209	Malonyl-[acyl-carrier protein]	C05753	3-Oxodecanoyl-[acp];	2.3.1.-	<Transferases; Acyltransferases; Transferring groups other than amino-acyl groups>	map00061	Fatty acid biosynthesis	bbr	ssp	mxa	lil	hpa	lin	eco	son		bba	bpa	bbr	gka	lpf	ngo	sme	cte	cli	tdn	aae	hth	nam
		x	C05752	Octanoyl-[acp];	C05753	3-Oxodecanoyl-[acp];	2.3.1.179	beta-ketoacyl-acyl-carrier-protein synthase II;	map00061	Fatty acid biosynthesis	bbr	ssp	mxa	lil	hpa	lin	eco	son	ama	bba	bpa	bbr	gka	lpf	ngo	sme	cte	cli	tdn	aae	hth	nam
		x	C01209	Malonyl-[acyl-carrier protein]	C05744	Acetoacetyl-[acp];	2.3.1.-	<Transferases; Acyltransferases; Transferring groups other than amino-acyl groups>	map00061	Fatty acid biosynthesis	bbr	ssp	mxa	lil	hpa	lin	eco	son		bba	bpa	bbr	gka	lpf	ngo	sme	cte	cli	tdn	aae	hth	nam
		x	C01209	Malonyl-[acyl-carrier protein]	C05753	3-Oxodecanoyl-[acp];	2.3.1.179	beta-ketoacyl-acyl-carrier-protein synthase II;	map00061	Fatty acid biosynthesis	bbr	ssp	mxa	lil	hpa	lin	eco	son	ama	bba	bpa	bbr	gka	lpf	ngo	sme	cte	cli	tdn	aae	hth	nam
		x	C04620	(3R)-3-Hydroxyoctanoyl-[acyl-carrier protein];	C05750	3-Oxooctanoyl-[acp];	2.3.1.-	<Transferases; Acyltransferases; Transferring groups other than amino-acyl groups>	map00061	Fatty acid biosynthesis	bbr	ssp	mxa	lil	hpa	lin	eco	son		bba	bpa	bbr	gka	lpf	ngo	sme	cte	cli	tdn	aae	hth	nam
		x	C04620	(3R)-3-Hydroxyoctanoyl-[acyl-carrier protein];	C05751	trans-Oct-2-enoyl-[acp];	2.3.1.-	<Transferases; Acyltransferases; Transferring groups other than amino-acyl groups>	map00061	Fatty acid biosynthesis	bbr	ssp	mxa	lil	hpa	lin	eco	son		bba	bpa	bbr	gka	lpf	ngo	sme	cte	cli	tdn	aae	hth	nam
		x	C01209	Malonyl-[acyl-carrier protein]	C05759	3-Oxotetradecanoyl-[acp];	2.3.1.179	beta-ketoacyl-acyl-carrier-protein synthase II;	map00061	Fatty acid biosynthesis	bbr	ssp	mxa	lil	hpa	lin	eco	son	ama	bba	bpa	bbr	gka	lpf	ngo	sme	cte	cli	tdn	aae	hth	nam
		x	C04688	(3R)-3-Hydroxytetradecanoyl-[acyl-carrier protein];	C05759	3-Oxotetradecanoyl-[acp];	2.3.1.-	<Transferases; Acyltransferases; Transferring groups other than amino-acyl groups>	map00061	Fatty acid biosynthesis	bbr	ssp	mxa	lil	hpa	lin	eco	son		bba	bpa	bbr	gka	lpf	ngo	sme	cte	cli	tdn	aae	hth	nam
		x	C05223	Dodecanoyl-[acyl-carrier protein];	C05759	3-Oxotetradecanoyl-[acp];	2.3.1.179	beta-ketoacyl-acyl-carrier-protein synthase II;	map00061	Fatty acid biosynthesis	bbr	ssp	mxa	lil	hpa	lin	eco	son	ama	bba	bpa	bbr	gka	lpf	ngo	sme	cte	cli	tdn	aae	hth	nam
		x	C05749	Hexanoyl-[acp];	C05750	3-Oxooctanoyl-[acp];	2.3.1.179	beta-ketoacyl-acyl-carrier-protein synthase II;	map00061	Fatty acid biosynthesis	bbr	ssp	mxa	lil	hpa	lin	eco	son	ama	bba	bpa	bbr	gka	lpf	ngo	sme	cte	cli	tdn	aae	hth	nam
		x	C05748	trans-Hex-2-enoyl-[acp];	C05749	Hexanoyl-[acp];	2.3.1.-	<Transferases; Acyltransferases; Transferring groups other than amino-acyl groups>	map00061	Fatty acid biosynthesis	bbr	ssp	mxa	lil	hpa	lin	eco	son		bba	bpa	bbr	gka	lpf	ngo	sme	cte	cli	tdn	aae	hth	nam
		x	C01209	Malonyl-[acyl-carrier protein]	C05759	3-Oxotetradecanoyl-[acp];	2.3.1.-	<Transferases; Acyltransferases; Transferring groups other than amino-acyl groups>	map00061	Fatty acid biosynthesis	bbr	ssp	mxa	lil	hpa	lin	eco	son		bba	bpa	bbr	gka	lpf	ngo	sme	cte	cli	tdn	aae	hth	nam
		x	C03939	Acetyl-[acyl-carrier protein]	C05744	Acetoacetyl-[acp];	2.3.1.179	beta-ketoacyl-acyl-carrier-protein synthase II;	map00061	Fatty acid biosynthesis	bbr	ssp	mxa	lil	hpa	lin	eco	son	ama	bba	bpa	bbr	gka	lpf	ngo	sme	cte	cli	tdn	aae	hth	nam
		x	C03939	Acetyl-[acyl-carrier protein]	C05744	Acetoacetyl-[acp];	2.3.1.180	beta-ketoacyl-acyl-carrier-protein synthase III;	map00061	Fatty acid biosynthesis	bbr	ssp	mxa	lil	hpa	lin	eco	son	ama	bba	bpa	bbr	gka	lpf	ngo	sme	cte	cli	tdn	aae	hth	nam
		x	C01209	Malonyl-[acyl-carrier protein]	C05756	3-Oxododecanoyl-[acp];	2.3.1.179	beta-ketoacyl-acyl-carrier-protein synthase II;	map00061	Fatty acid biosynthesis	bbr	ssp	mxa	lil	hpa	lin	eco	son	ama	bba	bpa	bbr	gka	lpf	ngo	sme	cte	cli	tdn	aae	hth	nam
		x	C05755	Decanoyl-[acp];	C05756	3-Oxododecanoyl-[acp];	2.3.1.179	beta-ketoacyl-acyl-carrier-protein synthase II;	map00061	Fatty acid biosynthesis	bbr	ssp	mxa	lil	hpa	lin	eco	son	ama	bba	bpa	bbr	gka	lpf	ngo	sme	cte	cli	tdn	aae	hth	nam
		x	C05754	trans-Dec-2-enoyl-[acp];	C05755	Decanoyl-[acp];	2.3.1.-	<Transferases; Acyltransferases; Transferring groups other than amino-acyl groups>	map00061	Fatty acid biosynthesis	bbr	ssp	mxa	lil	hpa	lin	eco	son		bba	bpa	bbr	gka	lpf	ngo	sme	cte	cli	tdn	aae	hth	nam
		x	C05756	3-Oxododecanoyl-[acp];	C05757	(R)-3-Hydroxydodecanoyl-[acp];	2.3.1.-	<Transferases; Acyltransferases; Transferring groups other than amino-acyl groups>	map00061	Fatty acid biosynthesis	bbr	ssp	mxa	lil	hpa	lin	eco	son		bba	bpa	bbr	gka	lpf	ngo	sme	cte	cli	tdn	aae	hth	nam
		x	C05757	(R)-3-Hydroxydodecanoyl-[acp];	C05758	trans-Dodec-2-enoyl-[acp];	2.3.1.-	<Transferases; Acyltransferases; Transferring groups other than amino-acyl groups>	map00061	Fatty acid biosynthesis	bbr	ssp	mxa	lil	hpa	lin	eco	son		bba	bpa	bbr	gka	lpf	ngo	sme	cte	cli	tdn	aae	hth	nam
		x	C04633	(3R)-3-Hydroxypalmitoyl-[acyl-carrier protein];	C05763	trans-Hexadec-2-enoyl-[acp];	2.3.1.-	<Transferases; Acyltransferases; Transferring groups other than amino-acyl groups>	map00061	Fatty acid biosynthesis	bbr	ssp	mxa	lil	hpa	lin	eco	son		bba	bpa	bbr	gka	lpf	ngo	sme	cte	cli	tdn	aae	hth	nam
		x	C05749	Hexanoyl-[acp];	C05750	3-Oxooctanoyl-[acp];	2.3.1.-	<Transferases; Acyltransferases; Transferring groups other than amino-acyl groups>	map00061	Fatty acid biosynthesis	bbr	ssp	mxa	lil	hpa	lin	eco	son		bba	bpa	bbr	gka	lpf	ngo	sme	cte	cli	tdn	aae	hth	nam
		x	C01209	Malonyl-[acyl-carrier protein]	C05746	3-Oxohexanoyl-[acp];	2.3.1.-	<Transferases; Acyltransferases; Transferring groups other than amino-acyl groups>	map00061	Fatty acid biosynthesis	bbr	ssp	mxa	lil	hpa	lin	eco	son		bba	bpa	bbr	gka	lpf	ngo	sme	cte	cli	tdn	aae	hth	nam
		x	C05746	3-Oxohexanoyl-[acp];	C05747	(R)-3-Hydroxyhexanoyl-[acp];	1.1.1.100	3-oxoacyl-[acyl-carrier-protein] reductase;	map00061	Fatty acid biosynthesis	bbr	ssp	mxa	lil	hpa	lin	eco	son	ama	bba	bpa	bbr	gka	lpf	ngo	sme	cte	cli	tdn	aae	hth	nam
		x	C05755	Decanoyl-[acp];	C05756	3-Oxododecanoyl-[acp];	2.3.1.-	<Transferases; Acyltransferases; Transferring groups other than amino-acyl groups>	map00061	Fatty acid biosynthesis	bbr	ssp	mxa	lil	hpa	lin	eco	son		bba	bpa	bbr	gka	lpf	ngo	sme	cte	cli	tdn	aae	hth	nam
		x	C05747	(R)-3-Hydroxyhexanoyl-[acp];	C05748	trans-Hex-2-enoyl-[acp];	2.3.1.-	<Transferases; Acyltransferases; Transferring groups other than amino-acyl groups>	map00061	Fatty acid biosynthesis	bbr	ssp	mxa	lil	hpa	lin	eco	son		bba	bpa	bbr	gka	lpf	ngo	sme	cte	cli	tdn	aae	hth	nam
		x	C01209	Malonyl-[acyl-carrier protein]	C05746	3-Oxohexanoyl-[acp];	2.3.1.179	beta-ketoacyl-acyl-carrier-protein synthase II;	map00061	Fatty acid biosynthesis	bbr	ssp	mxa	lil	hpa	lin	eco	son	ama	bba	bpa	bbr	gka	lpf	ngo	sme	cte	cli	tdn	aae	hth	nam
		x	C04688	(3R)-3-Hydroxytetradecanoyl-[acyl-carrier protein];	C05760	trans-Tetradec-2-enoyl-[acp];	2.3.1.-	<Transferases; Acyltransferases; Transferring groups other than amino-acyl groups>	map00061	Fatty acid biosynthesis	bbr	ssp	mxa	lil	hpa	lin	eco	son		bba	bpa	bbr	gka	lpf	ngo	sme	cte	cli	tdn	aae	hth	nam
		x	C05760	trans-Tetradec-2-enoyl-[acp];	C05761	Tetradecanoyl-[acp];	2.3.1.-	<Transferases; Acyltransferases; Transferring groups other than amino-acyl groups>	map00061	Fatty acid biosynthesis	bbr	ssp	mxa	lil	hpa	lin	eco	son		bba	bpa	bbr	gka	lpf	ngo	sme	cte	cli	tdn	aae	hth	nam
		x	C05751	trans-Oct-2-enoyl-[acp];	C05752	Octanoyl-[acp];	2.3.1.-	<Transferases; Acyltransferases; Transferring groups other than amino-acyl groups>	map00061	Fatty acid biosynthesis	bbr	ssp	mxa	lil	hpa	lin	eco	son		bba	bpa	bbr	gka	lpf	ngo	sme	cte	cli	tdn	aae	hth	nam
		x	C01209	Malonyl-[acyl-carrier protein]	C05744	Acetoacetyl-[acp];	2.3.1.179	beta-ketoacyl-acyl-carrier-protein synthase II;	map00061	Fatty acid biosynthesis	bbr	ssp	mxa	lil	hpa	lin	eco	son	ama	bba	bpa	bbr	gka	lpf	ngo	sme	cte	cli	tdn	aae	hth	nam
		x	C01209	Malonyl-[acyl-carrier protein]	C05756	3-Oxododecanoyl-[acp];	2.3.1.-	<Transferases; Acyltransferases; Transferring groups other than amino-acyl groups>	map00061	Fatty acid biosynthesis	bbr	ssp	mxa	lil	hpa	lin	eco	son		bba	bpa	bbr	gka	lpf	ngo	sme	cte	cli	tdn	aae	hth	nam
		x	C01209	Malonyl-[acyl-carrier protein]	C05750	3-Oxooctanoyl-[acp];	2.3.1.179	beta-ketoacyl-acyl-carrier-protein synthase II;	map00061	Fatty acid biosynthesis	bbr	ssp	mxa	lil	hpa	lin	eco	son	ama	bba	bpa	bbr	gka	lpf	ngo	sme	cte	cli	tdn	aae	hth	nam
		x	C05746	3-Oxohexanoyl-[acp];	C05747	(R)-3-Hydroxyhexanoyl-[acp];	2.3.1.-	<Transferases; Acyltransferases; Transferring groups other than amino-acyl groups>	map00061	Fatty acid biosynthesis	bbr	ssp	mxa	lil	hpa	lin	eco	son		bba	bpa	bbr	gka	lpf	ngo	sme	cte	cli	tdn	aae	hth	nam
		x	C04619	(3R)-3-Hydroxydecanoyl-[acyl-carrier protein];	C05753	3-Oxodecanoyl-[acp];	1.1.1.100	3-oxoacyl-[acyl-carrier-protein] reductase;	map00061	Fatty acid biosynthesis	bbr	ssp	mxa	lil	hpa	lin	eco	son	ama	bba	bpa	bbr	gka	lpf	ngo	sme	cte	cli	tdn	aae	hth	nam
		x	C01209	Malonyl-[acyl-carrier protein]	C05762	3-Oxohexadecanoyl-[acp];	2.3.1.179	beta-ketoacyl-acyl-carrier-protein synthase II;	map00061	Fatty acid biosynthesis	bbr	ssp	mxa	lil	hpa	lin	eco	son	ama	bba	bpa	bbr	gka	lpf	ngo	sme	cte	cli	tdn	aae	hth	nam
		x	C04619	(3R)-3-Hydroxydecanoyl-[acyl-carrier protein];	C05754	trans-Dec-2-enoyl-[acp];	2.3.1.-	<Transferases; Acyltransferases; Transferring groups other than amino-acyl groups>	map00061	Fatty acid biosynthesis	bbr	ssp	mxa	lil	hpa	lin	eco	son		bba	bpa	bbr	gka	lpf	ngo	sme	cte	cli	tdn	aae	hth	nam
		x	C04633	(3R)-3-Hydroxypalmitoyl-[acyl-carrier protein];	C05762	3-Oxohexadecanoyl-[acp];	1.1.1.100	3-oxoacyl-[acyl-carrier-protein] reductase;	map00061	Fatty acid biosynthesis	bbr	ssp	mxa	lil	hpa	lin	eco	son	ama	bba	bpa	bbr	gka	lpf	ngo	sme	cte	cli	tdn	aae	hth	nam
		x	C05756	3-Oxododecanoyl-[acp];	C05757	(R)-3-Hydroxydodecanoyl-[acp];	1.1.1.100	3-oxoacyl-[acyl-carrier-protein] reductase;	map00061	Fatty acid biosynthesis	bbr	ssp	mxa	lil	hpa	lin	eco	son	ama	bba	bpa	bbr	gka	lpf	ngo	sme	cte	cli	tdn	aae	hth	nam
		x	C04618	(3R)-3-Hydroxybutanoyl-[acyl-carrier protein];	C05744	Acetoacetyl-[acp];	2.3.1.-	<Transferases; Acyltransferases; Transferring groups other than amino-acyl groups>	map00061	Fatty acid biosynthesis	bbr	ssp	mxa	lil	hpa	lin	eco	son		bba	bpa	bbr	gka	lpf	ngo	sme	cte	cli	tdn	aae	hth	nam
		x	C04246	But-2-enoyl-[acyl-carrier protein]	C04618	(3R)-3-Hydroxybutanoyl-[acyl-carrier protein];	2.3.1.-	<Transferases; Acyltransferases; Transferring groups other than amino-acyl groups>	map00061	Fatty acid biosynthesis	bbr	ssp	mxa	lil	hpa	lin	eco	son		bba	bpa	bbr	gka	lpf	ngo	sme	cte	cli	tdn	aae	hth	nam
		x	C04246	But-2-enoyl-[acyl-carrier protein]	C05745	Butyryl-[acp];	2.3.1.-	<Transferases; Acyltransferases; Transferring groups other than amino-acyl groups>	map00061	Fatty acid biosynthesis	bbr	ssp	mxa	lil	hpa	lin	eco	son		bba	bpa	bbr	gka	lpf	ngo	sme	cte	cli	tdn	aae	hth	nam
		x	C05745	Butyryl-[acp];	C05746	3-Oxohexanoyl-[acp];	2.3.1.179	beta-ketoacyl-acyl-carrier-protein synthase II;	map00061	Fatty acid biosynthesis	bbr	ssp	mxa	lil	hpa	lin	eco	son	ama	bba	bpa	bbr	gka	lpf	ngo	sme	cte	cli	tdn	aae	hth	nam
		x	C05752	Octanoyl-[acp];	C05753	3-Oxodecanoyl-[acp];	2.3.1.-	<Transferases; Acyltransferases; Transferring groups other than amino-acyl groups>	map00061	Fatty acid biosynthesis	bbr	ssp	mxa	lil	hpa	lin	eco	son		bba	bpa	bbr	gka	lpf	ngo	sme	cte	cli	tdn	aae	hth	nam
		x	C05223	Dodecanoyl-[acyl-carrier protein];	C05758	trans-Dodec-2-enoyl-[acp];	2.3.1.-	<Transferases; Acyltransferases; Transferring groups other than amino-acyl groups>	map00061	Fatty acid biosynthesis	bbr	ssp	mxa	lil	hpa	lin	eco	son		bba	bpa	bbr	gka	lpf	ngo	sme	cte	cli	tdn	aae	hth	nam
		x	C00311	Isocitrate;	C00417	cis-Aconitate;	4.2.1.3	aconitate hydratase;	map00020; map00630; map00720	Citrate cycle (TCA cycle); Glyoxylate and dicarboxylate metabolism; Reductive carboxylate cycle (CO2 fixation)	bbr	ssp	mxa	lil	hpa	lin	eco	son	ama	bba	bpa	bbr	gka	lpf	ngo	sme	cte	cli	tdn	aae	hth	nam
		x	C05761	Tetradecanoyl-[acp];	C05762	3-Oxohexadecanoyl-[acp];	2.3.1.-	<Transferases; Acyltransferases; Transferring groups other than amino-acyl groups>	map00061	Fatty acid biosynthesis	bbr	ssp	mxa	lil	hpa	lin	eco	son		bba	bpa	bbr	gka	lpf	ngo	sme	cte	cli	tdn	aae	hth	nam
		x	C04619	(3R)-3-Hydroxydecanoyl-[acyl-carrier protein];	C05753	3-Oxodecanoyl-[acp];	2.3.1.-	<Transferases; Acyltransferases; Transferring groups other than amino-acyl groups>	map00061	Fatty acid biosynthesis	bbr	ssp	mxa	lil	hpa	lin	eco	son		bba	bpa	bbr	gka	lpf	ngo	sme	cte	cli	tdn	aae	hth	nam
		x	C04620	(3R)-3-Hydroxyoctanoyl-[acyl-carrier protein];	C05750	3-Oxooctanoyl-[acp];	1.1.1.100	3-oxoacyl-[acyl-carrier-protein] reductase;	map00061	Fatty acid biosynthesis	bbr	ssp	mxa	lil	hpa	lin	eco	son	ama	bba	bpa	bbr	gka	lpf	ngo	sme	cte	cli	tdn	aae	hth	nam
		x	C05223	Dodecanoyl-[acyl-carrier protein];	C05759	3-Oxotetradecanoyl-[acp];	2.3.1.-	<Transferases; Acyltransferases; Transferring groups other than amino-acyl groups>	map00061	Fatty acid biosynthesis	bbr	ssp	mxa	lil	hpa	lin	eco	son		bba	bpa	bbr	gka	lpf	ngo	sme	cte	cli	tdn	aae	hth	nam
		x	C05763	trans-Hexadec-2-enoyl-[acp];	C05764	Hexadecanoyl-[acp];	2.3.1.-	<Transferases; Acyltransferases; Transferring groups other than amino-acyl groups>	map00061	Fatty acid biosynthesis	bbr	ssp	mxa	lil	hpa	lin	eco	son		bba	bpa	bbr	gka	lpf	ngo	sme	cte	cli	tdn	aae	hth	nam
		x	C00249	Hexadecanoic acid;	C05764	Hexadecanoyl-[acp];	2.3.1.-	<Transferases; Acyltransferases; Transferring groups other than amino-acyl groups>	map00061; map01040	Fatty acid biosynthesis; Biosynthesis of unsaturated fatty acids	bbr	ssp	mxa	lil	hpa	lin	eco	son		bba	bpa	bbr	gka	lpf	ngo	sme	cte	cli	tdn	aae	hth	nam
		x	C05745	Butyryl-[acp];	C05746	3-Oxohexanoyl-[acp];	2.3.1.-	<Transferases; Acyltransferases; Transferring groups other than amino-acyl groups>	map00061	Fatty acid biosynthesis	bbr	ssp	mxa	lil	hpa	lin	eco	son		bba	bpa	bbr	gka	lpf	ngo	sme	cte	cli	tdn	aae	hth	nam
		x	C05761	Tetradecanoyl-[acp];	C05762	3-Oxohexadecanoyl-[acp];	2.3.1.179	beta-ketoacyl-acyl-carrier-protein synthase II;	map00061	Fatty acid biosynthesis	bbr	ssp	mxa	lil	hpa	lin	eco	son	ama	bba	bpa	bbr	gka	lpf	ngo	sme	cte	cli	tdn	aae	hth	nam
		x	C00024	Acetyl-CoA;	C00033	Acetate;	6.2.1.1	acetate---CoA ligase;	map00010; map00620; map00720	Glycolysis / Gluconeogenesis; Pyruvate metabolism; Reductive carboxylate cycle (CO2 fixation)	bbr	ssp	mxa	lil	hpa	lin	eco	son		bba	bpa	bbr	gka	lpf		sme	cte	cli	tdn	aae	hth	nam
		x	C04618	(3R)-3-Hydroxybutanoyl-[acyl-carrier protein];	C05744	Acetoacetyl-[acp];	1.1.1.100	3-oxoacyl-[acyl-carrier-protein] reductase;	map00061	Fatty acid biosynthesis	bbr	ssp	mxa	lil	hpa	lin	eco	son	ama	bba	bpa	bbr	gka	lpf	ngo	sme	cte	cli	tdn	aae	hth	nam
Subsystem 3	0.0011258091753447786										bbr	ssp	mxa			lin	eco	son	ama		bpa	bbr	gka	lpf	ngo	sme
		i	C00352	D-Glucosamine 6-phosphate;	C06156	alpha-D-Glucosamine 1-phosphate;	5.4.2.10	phosphoglucosamine mutase	map00520	Amino sugar and nucleotide sugar metabolism	bbr	ssp	mxa		hpa	lin	eco	son	ama	bba	bpa	bbr	gka	lpf	ngo	sme			tdn			nam
		s	C03373	Aminoimidazole ribotide;	C15667	5-Carboxyamino-1-(5-phospho-D-ribosyl)imidazole	6.3.4.18	5-(carboxyamino)imidazole ribonucleotide synthase;	map00230	Purine metabolism	bbr	ssp	mxa	lil		lin	eco	son	ama		bpa	bbr	gka	lpf	ngo	sme				aae	hth
		x	C00352	D-Glucosamine 6-phosphate;	C05345	beta-D-Fructose 6-phosphate	2.6.1.16	glutamine---fructose-6-phosphate transaminase (isomerizing);	map00520	Amino sugar and nucleotide sugar metabolism	bbr	ssp	mxa	lil	hpa	lin	eco	son	ama	bba	bpa	bbr	gka	lpf	ngo	sme	cte	cli	tdn	aae	hth	nam
		x	C03373	Aminoimidazole ribotide;	C04640	2-(Formamido)-N1-(5'-phosphoribosyl)acetamidine;	6.3.3.1	phosphoribosylformylglycinamidine cyclo-ligase;	map00230	Purine metabolism	bbr	ssp	mxa	lil		lin	eco	son	ama	bba	bpa	bbr	gka	lpf	ngo	sme	cte	cli	tdn	aae	hth	nam
		x	C00279	D-Erythrose 4-phosphate	C05345	beta-D-Fructose 6-phosphate	2.2.1.1	transketolase;	map00030	Pentose phosphate pathway	bbr	ssp	mxa	lil	hpa	lin	eco	son	ama	bba	bpa	bbr	gka	lpf	ngo	sme	cte	cli	tdn	aae	hth	nam
		x	C00118	D-Glyceraldehyde 3-phosphate;	C00279	D-Erythrose 4-phosphate	2.2.1.1	transketolase;	map00030; map00710	Pentose phosphate pathway; Carbon fixation in photosynthetic organisms	bbr	ssp	mxa	lil	hpa	lin	eco	son	ama	bba	bpa	bbr	gka	lpf	ngo	sme	cte	cli	tdn	aae	hth	nam
		x	C00118	D-Glyceraldehyde 3-phosphate;	C00231	D-Xylulose 5-phosphate	2.2.1.1	transketolase;	map00030; map00710	Pentose phosphate pathway; Carbon fixation in photosynthetic organisms	bbr	ssp	mxa	lil	hpa	lin	eco	son	ama	bba	bpa	bbr	gka	lpf	ngo	sme	cte	cli	tdn	aae	hth	nam
		x	C00199	D-Ribulose 5-phosphate	C00231	D-Xylulose 5-phosphate	5.1.3.1	ribulose-phosphate 3-epimerase;	map00030; map00040; map00710	Pentose phosphate pathway; Pentose and glucuronate interconversions; Carbon fixation in photosynthetic organisms	bbr	ssp	mxa	lil	hpa	lin	eco	son	ama	bba	bpa	bbr	gka	lpf	ngo	sme	cte	cli	tdn	aae	hth	nam
		x	C00111	Glycerone phosphate;	C00118	D-Glyceraldehyde 3-phosphate;	5.3.1.1	triose-phosphate isomerase;	map00010; map00051; map00562; map00710	Glycolysis / Gluconeogenesis; Fructose and mannose metabolism; Inositol phosphate metabolism; Carbon fixation in photosynthetic organisms	bbr	ssp	mxa	lil	hpa	lin	eco	son	ama	bba	bpa	bbr	gka	lpf	ngo	sme	cte	cli	tdn	aae	hth	nam
		x	C00111	Glycerone phosphate;	C01094	D-Fructose 1-phosphate	4.1.2.13	fructose-bisphosphate aldolase;	map00051	Fructose and mannose metabolism	bbr	ssp	mxa	lil	hpa	lin	eco	son	ama	bba	bpa	bbr	gka	lpf	ngo	sme	cte	cli	tdn	aae	hth	nam
		x	C00231	D-Xylulose 5-phosphate	C05345	beta-D-Fructose 6-phosphate	2.2.1.1	transketolase;	map00030	Pentose phosphate pathway	bbr	ssp	mxa	lil	hpa	lin	eco	son	ama	bba	bpa	bbr	gka	lpf	ngo	sme	cte	cli	tdn	aae	hth	nam
		x	C00111	Glycerone phosphate;	C05378	beta-D-Fructose 1,6-bisphosphate	4.1.2.13	fructose-bisphosphate aldolase;	map00010; map00051	Glycolysis / Gluconeogenesis; Fructose and mannose metabolism	bbr	ssp	mxa	lil	hpa	lin	eco	son	ama	bba	bpa	bbr	gka	lpf	ngo	sme	cte	cli	tdn	aae	hth	nam
		x	C00118	D-Glyceraldehyde 3-phosphate;	C05378	beta-D-Fructose 1,6-bisphosphate	4.1.2.13	fructose-bisphosphate aldolase;	map00010; map00030; map00051	Glycolysis / Gluconeogenesis; Pentose phosphate pathway; Fructose and mannose metabolism	bbr	ssp	mxa	lil	hpa	lin	eco	son	ama	bba	bpa	bbr	gka	lpf	ngo	sme	cte	cli	tdn	aae	hth	nam
		x	C00118	D-Glyceraldehyde 3-phosphate;	C00236	3-Phospho-D-glyceroyl phosphate;	1.2.1.12	glyceraldehyde-3-phosphate dehydrogenase (phosphorylating);	map00010	Glycolysis / Gluconeogenesis	bbr	ssp	mxa	lil	hpa	lin	eco	son	ama	bba	bpa	bbr	gka	lpf	ngo	sme	cte	cli	tdn	aae	hth	nam
		x	C00197	3-Phospho-D-glycerate;	C00236	3-Phospho-D-glyceroyl phosphate;	2.7.2.3	phosphoglycerate kinase;	map00010; map00710	Glycolysis / Gluconeogenesis; Carbon fixation in photosynthetic organisms	bbr	ssp	mxa	lil	hpa	lin	eco	son	ama	bba	bpa	bbr	gka	lpf	ngo	sme	cte	cli	tdn	aae	hth	nam
		x	C00197	3-Phospho-D-glycerate;	C00631	2-Phospho-D-glycerate;	5.4.2.1	phosphoglycerate mutase;	map00010	Glycolysis / Gluconeogenesis	bbr	ssp	mxa	lil	hpa	lin	eco	son	ama	bba	bpa	bbr	gka	lpf	ngo	sme	cte	cli	tdn	aae	hth	nam
		x	C00074	Phosphoenolpyruvate;	C00631	2-Phospho-D-glycerate;	4.2.1.11	phosphopyruvate hydratase;	map00010	Glycolysis / Gluconeogenesis	bbr	ssp	mxa	lil	hpa	lin	eco	son	ama	bba	bpa	bbr	gka	lpf	ngo	sme	cte	cli	tdn	aae	hth	nam
		x	C00117	D-Ribose 5-phosphate;	C00118	D-Glyceraldehyde 3-phosphate;	2.2.1.1	transketolase;	map00030; map00710	Pentose phosphate pathway; Carbon fixation in photosynthetic organisms	bbr	ssp	mxa	lil	hpa	lin	eco	son	ama	bba	bpa	bbr	gka	lpf	ngo	sme	cte	cli	tdn	aae	hth	nam
		x	C00117	D-Ribose 5-phosphate;	C05382	Sedoheptulose 7-phosphate;	2.2.1.1	transketolase;	map00030; map00710	Pentose phosphate pathway; Carbon fixation in photosynthetic organisms	bbr	ssp	mxa	lil	hpa	lin	eco	son	ama	bba	bpa	bbr	gka	lpf	ngo	sme	cte	cli	tdn	aae	hth	nam
		x	C04751	1-(5-Phospho-D-ribosyl)-5-amino-4-imidazolecarboxylate;	C15667	5-Carboxyamino-1-(5-phospho-D-ribosyl)imidazole	5.4.99.18	5-(carboxyamino)imidazole ribonucleotide mutase;	map00230	Purine metabolism	bbr	ssp	mxa	lil		lin	eco	son	ama	bba	bpa	bbr	gka	lpf	ngo	sme	cte	cli	tdn	aae	hth	nam
		x	C00117	D-Ribose 5-phosphate;	C00119	5-Phospho-alpha-D-ribose 1-diphosphate;	2.7.6.1	ribose-phosphate diphosphokinase;	map00030; map00230	Pentose phosphate pathway; Purine metabolism	bbr	ssp	mxa	lil	hpa	lin	eco	son	ama	bba	bpa	bbr	gka	lpf	ngo	sme	cte	cli	tdn	aae	hth	nam
		x	C00119	5-Phospho-alpha-D-ribose 1-diphosphate;	C01103	Orotidine 5'-phosphate;	2.4.2.10	orotate phosphoribosyltransferase;	map00240	Pyrimidine metabolism	bbr	ssp	mxa	lil	hpa	lin	eco	son	ama	bba	bpa	bbr	gka	lpf	ngo	sme	cte	cli	tdn	aae	hth	nam
		x	C00119	5-Phospho-alpha-D-ribose 1-diphosphate;	C03090	5-Phosphoribosylamine;	2.4.2.14	amidophosphoribosyltransferase;	map00230	Purine metabolism	bbr	ssp	mxa	lil		lin	eco	son	ama	bba	bpa	bbr	gka	lpf	ngo	sme	cte	cli	tdn	aae	hth	nam
		x	C03090	5-Phosphoribosylamine;	C03838	5'-Phosphoribosylglycinamide;	6.3.4.13	phosphoribosylamine---glycine ligase;	map00230	Purine metabolism	bbr	ssp	mxa	lil	hpa	lin	eco	son	ama	bba	bpa	bbr	gka	lpf	ngo	sme	cte	cli	tdn	aae	hth	nam
		x	C00105	UMP;	C01103	Orotidine 5'-phosphate;	4.1.1.23	orotidine-5'-phosphate decarboxylase;	map00240	Pyrimidine metabolism	bbr	ssp	mxa	lil	hpa	lin	eco	son	ama	bba	bpa	bbr	gka	lpf	ngo	sme	cte	cli	tdn	aae	hth	nam
		x	C04376	5'-Phosphoribosyl-N-formylglycinamide;	C04640	2-(Formamido)-N1-(5'-phosphoribosyl)acetamidine;	6.3.5.3	phosphoribosylformylglycinamidine synthase;	map00230	Purine metabolism	bbr	ssp	mxa	lil		lin	eco	son	ama	bba	bpa	bbr	gka	lpf	ngo	sme	cte	cli	tdn	aae	hth	nam
		x	C04501	N-Acetyl-alpha-D-glucosamine 1-phosphate	C06156	alpha-D-Glucosamine 1-phosphate;	2.3.1.157	glucosamine-1-phosphate N-acetyltransferase	map00520	Amino sugar and nucleotide sugar metabolism	bbr	ssp	mxa		hpa	lin	eco	son	ama	bba	bpa	bbr	gka	lpf	ngo	sme			tdn	aae	hth	nam
		x	C00043	UDP-N-acetyl-D-glucosamine;	C04501	N-Acetyl-alpha-D-glucosamine 1-phosphate	2.7.7.23	UDP-N-acetylglucosamine diphosphorylase;	map00520	Amino sugar and nucleotide sugar metabolism	bbr	ssp	mxa	lil	hpa	lin	eco	son	ama	bba	bpa	bbr	gka	lpf	ngo	sme	cte	cli	tdn	aae	hth	nam
		x	C00043	UDP-N-acetyl-D-glucosamine;	C04631	UDP-N-acetyl-3-(1-carboxyvinyl)-D-glucosamine;	2.5.1.7	UDP-N-acetylglucosamine 1-carboxyvinyltransferase;	map00520; map00550	Amino sugar and nucleotide sugar metabolism; Peptidoglycan biosynthesis	bbr	ssp	mxa	lil	hpa	lin	eco	son	ama	bba	bpa	bbr	gka	lpf	ngo	sme	cte	cli	tdn	aae	hth	nam
		x	C01050	UDP-N-acetylmuramate;	C04631	UDP-N-acetyl-3-(1-carboxyvinyl)-D-glucosamine;	1.1.1.158	UDP-N-acetylmuramate dehydrogenase;	map00520; map00550	Amino sugar and nucleotide sugar metabolism; Peptidoglycan biosynthesis	bbr	ssp	mxa	lil	hpa	lin	eco	son	ama	bba	bpa	bbr	gka	lpf	ngo	sme	cte	cli	tdn	aae	hth	nam
		x	C01050	UDP-N-acetylmuramate;	C01212	UDP-N-acetylmuramoyl-L-alanine	6.3.2.8	UDP-N-acetylmuramate---L-alanine ligase;	map00471; map00550	D-Glutamine and D-glutamate metabolism; Peptidoglycan biosynthesis	bbr	ssp	mxa	lil	hpa	lin	eco	son	ama	bba	bpa	bbr	gka	lpf	ngo	sme	cte	cli	tdn	aae	hth	nam
		x	C00692	UDP-N-acetylmuramoyl-L-alanyl-D-glutamate	C01212	UDP-N-acetylmuramoyl-L-alanine	6.3.2.9	UDP-N-acetylmuramoyl-L-alanine---D-glutamate ligase;	map00471; map00550	D-Glutamine and D-glutamate metabolism; Peptidoglycan biosynthesis	bbr	ssp	mxa	lil	hpa	lin	eco	son	ama	bba	bpa	bbr	gka	lpf	ngo	sme	cte	cli	tdn	aae	hth	nam
		x	C00117	D-Ribose 5-phosphate;	C00199	D-Ribulose 5-phosphate	5.3.1.6	ribose-5-phosphate isomerase;	map00030; map00710	Pentose phosphate pathway; Carbon fixation in photosynthetic organisms	bbr	ssp	mxa	lil	hpa	lin	eco	son	ama	bba	bpa	bbr	gka	lpf	ngo	sme	cte	cli	tdn	aae	hth	nam
		x	C00295	Orotate;	C01103	Orotidine 5'-phosphate;	2.4.2.10	orotate phosphoribosyltransferase;	map00240	Pyrimidine metabolism	bbr	ssp	mxa	lil	hpa	lin	eco	son	ama	bba	bpa	bbr	gka	lpf	ngo	sme	cte	cli	tdn	aae	hth	nam
		x	C00295	Orotate;	C00337	(S)-Dihydroorotate;	1.3.3.1	dihydroorotate oxidase;	map00240	Pyrimidine metabolism	bbr	ssp	mxa	lil	hpa	lin	eco	son	ama	bba	bpa	bbr	gka	lpf	ngo	sme	cte	cli	tdn	aae	hth	nam
		x	C00337	(S)-Dihydroorotate;	C00438	N-Carbamoyl-L-aspartate	3.5.2.3	dihydroorotase;	map00240	Pyrimidine metabolism	bbr	ssp	mxa	lil	hpa	lin	eco	son	ama	bba	bpa	bbr	gka	lpf	ngo	sme	cte	cli	tdn	aae	hth	nam
		x	C00169	Carbamoyl phosphate	C00438	N-Carbamoyl-L-aspartate	2.1.3.2	aspartate carbamoyltransferase;	map00240; map00250	Pyrimidine metabolism; Alanine, aspartate and glutamate metabolism	bbr	ssp	mxa	lil	hpa	lin	eco	son	ama	bba	bpa	bbr	gka	lpf	ngo	sme	cte	cli	tdn	aae	hth	nam
		x	C00064	L-Glutamine;	C00169	Carbamoyl phosphate	6.3.5.5	carbamoyl-phosphate synthase (glutamine-hydrolysing);	map00240; map00250	Pyrimidine metabolism; Alanine, aspartate and glutamate metabolism	bbr	ssp	mxa	lil	hpa	lin	eco	son	ama	bba	bpa	bbr	gka	lpf	ngo	sme	cte	cli	tdn	aae	hth	nam
		x	C00025	L-Glutamate;	C00064	L-Glutamine;	6.3.1.2	glutamate---ammonia ligase;	map00250; map00330; map00910	Alanine, aspartate and glutamate metabolism; Arginine and proline metabolism; Nitrogen metabolism	bbr	ssp	mxa	lil	hpa	lin	eco	son	ama	bba	bpa	bbr	gka	lpf	ngo	sme	cte	cli	tdn	aae	hth	nam
		x	C00231	D-Xylulose 5-phosphate	C05382	Sedoheptulose 7-phosphate;	2.2.1.1	transketolase;	map00030; map00710	Pentose phosphate pathway; Carbon fixation in photosynthetic organisms	bbr	ssp	mxa	lil	hpa	lin	eco	son	ama	bba	bpa	bbr	gka	lpf	ngo	sme	cte	cli	tdn	aae	hth	nam
		x	C00015	UDP;	C00105	UMP;	2.7.4.14	cytidylate kinase;	map00240	Pyrimidine metabolism	bbr	ssp	mxa	lil		lin	eco	son	ama	bba	bpa	bbr	gka	lpf	ngo	sme	cte	cli		aae	hth
		x	C00015	UDP;	C00075	UTP;	2.7.4.6	nucleoside-diphosphate kinase;	map00240	Pyrimidine metabolism	bbr	ssp	mxa	lil	hpa	lin	eco	son	ama	bba	bpa	bbr	gka	lpf	ngo	sme	cte	cli	tdn	aae	hth	nam
		x	C00063	CTP;	C00075	UTP;	6.3.4.2	CTP synthase;	map00240	Pyrimidine metabolism	bbr	ssp	mxa	lil	hpa	lin	eco	son	ama	bba	bpa	bbr	gka	lpf	ngo	sme	cte	cli	tdn	aae	hth	nam
		x	C00063	CTP;	C00112	CDP;	2.7.4.6	nucleoside-diphosphate kinase;	map00240	Pyrimidine metabolism	bbr	ssp	mxa	lil	hpa	lin	eco	son	ama	bba	bpa	bbr	gka	lpf	ngo	sme	cte	cli	tdn	aae	hth	nam
		x	C00055	CMP;	C00112	CDP;	2.7.4.14	cytidylate kinase;	map00240	Pyrimidine metabolism	bbr	ssp	mxa	lil		lin	eco	son	ama	bba	bpa	bbr	gka	lpf	ngo	sme	cte	cli		aae	hth
		x	C00046	RNA;	C00063	CTP;	2.7.7.6	DNA-directed RNA polymerase;	map00240	Pyrimidine metabolism	bbr	ssp	mxa	lil	hpa	lin	eco	son	ama	bba	bpa	bbr	gka	lpf	ngo	sme	cte	cli	tdn	aae	hth	nam
		x	C00002	ATP;	C00046	RNA;	2.7.7.6	DNA-directed RNA polymerase;	map00230	Purine metabolism	bbr	ssp	mxa	lil	hpa	lin	eco	son	ama	bba	bpa	bbr	gka	lpf	ngo	sme	cte	cli	tdn	aae	hth	nam
		x	C00044	GTP;	C00046	RNA;	2.7.7.6	DNA-directed RNA polymerase;	map00230	Purine metabolism	bbr	ssp	mxa	lil	hpa	lin	eco	son	ama	bba	bpa	bbr	gka	lpf	ngo	sme	cte	cli	tdn	aae	hth	nam
		x	C00035	GDP;	C00044	GTP;	2.7.4.6	nucleoside-diphosphate kinase;	map00230	Purine metabolism	bbr	ssp	mxa	lil	hpa	lin	eco	son	ama	bba	bpa	bbr	gka	lpf	ngo	sme	cte	cli	tdn	aae	hth	nam
		x	C00035	GDP;	C00361	dGDP;	1.17.4.1	ribonucleoside-diphosphate reductase;	map00230	Purine metabolism	bbr	ssp	mxa	lil	hpa	lin	eco	son	ama	bba	bpa	bbr	gka	lpf	ngo	sme	cte	cli	tdn	aae	hth	nam
		x	C00035	GDP;	C00144	GMP;	2.7.4.8	guanylate kinase;	map00230	Purine metabolism	bbr	ssp	mxa	lil	hpa	lin	eco	son	ama	bba	bpa	bbr	gka	lpf	ngo	sme	cte	cli	tdn	aae	hth	nam
		x	C00286	dGTP;	C00361	dGDP;	2.7.4.6	nucleoside-diphosphate kinase;	map00230	Purine metabolism	bbr	ssp	mxa	lil	hpa	lin	eco	son	ama	bba	bpa	bbr	gka	lpf	ngo	sme	cte	cli	tdn	aae	hth	nam
		x	C00361	dGDP;	C00362	dGMP;	2.7.4.8	guanylate kinase;	map00230	Purine metabolism	bbr	ssp	mxa	lil	hpa	lin	eco	son	ama	bba	bpa	bbr	gka	lpf	ngo	sme	cte	cli	tdn	aae	hth	nam
		x	C00144	GMP;	C00655	Xanthosine 5'-phosphate;	6.3.5.2	GMP synthase (glutamine-hydrolysing);	map00230	Purine metabolism	bbr	ssp	mxa	lil	hpa	lin	eco	son	ama	bba	bpa	bbr	gka	lpf	ngo	sme	cte	cli	tdn	aae	hth	nam
		x	C00130	IMP;	C00655	Xanthosine 5'-phosphate;	1.1.1.205	IMP dehydrogenase;	map00230	Purine metabolism	bbr	ssp	mxa	lil	hpa	lin	eco	son	ama	bba	bpa	bbr	gka	lpf	ngo	sme	cte	cli	tdn	aae	hth	nam
		x	C00130	IMP;	C04734	1-(5'-Phosphoribosyl)-5-formamido-4-imidazolecarboxamide;	2.1.2.3	phosphoribosylaminoimidazolecarboxamide formyltransferase;	map00230	Purine metabolism	bbr	ssp	mxa	lil		lin	eco	son	ama	bba	bpa	bbr	gka	lpf	ngo	sme	cte	cli	tdn	aae	hth	nam
		x	C04677	1-(5'-Phosphoribosyl)-5-amino-4-imidazolecarboxamide;	C04734	1-(5'-Phosphoribosyl)-5-formamido-4-imidazolecarboxamide;	6.3.4.-	<Ligases; Forming carbon-nitrogen bonds; Other carbon--nitrogen ligases>	map00230	Purine metabolism	bbr	ssp	mxa	lil	hpa	lin	eco	son	ama	bba	bpa	bbr	gka	lpf	ngo	sme	cte	cli	tdn	aae	hth	nam
		x	C04677	1-(5'-Phosphoribosyl)-5-amino-4-imidazolecarboxamide;	C04823	1-(5'-Phosphoribosyl)-5-amino-4-(N-succinocarboxamide)-imidazole;	4.3.2.2	adenylosuccinate lyase;	map00230	Purine metabolism	bbr	ssp	mxa	lil	hpa	lin	eco	son	ama	bba	bpa	bbr	gka	lpf	ngo	sme	cte	cli	tdn	aae	hth	nam
		x	C00130	IMP;	C03794	N6-(1,2-Dicarboxyethyl)-AMP;	6.3.4.4	adenylosuccinate synthase;	map00230	Purine metabolism	bbr	ssp	mxa	lil	hpa	lin	eco	son	ama	bba	bpa	bbr	gka	lpf	ngo	sme	cte	cli	tdn	aae	hth	nam
		x	C00020	AMP;	C03794	N6-(1,2-Dicarboxyethyl)-AMP;	4.3.2.2	adenylosuccinate lyase;	map00230	Purine metabolism	bbr	ssp	mxa	lil	hpa	lin	eco	son	ama	bba	bpa	bbr	gka	lpf	ngo	sme	cte	cli	tdn	aae	hth	nam
		x	C04677	1-(5'-Phosphoribosyl)-5-amino-4-imidazolecarboxamide;	C04734	1-(5'-Phosphoribosyl)-5-formamido-4-imidazolecarboxamide;	2.1.2.3	phosphoribosylaminoimidazolecarboxamide formyltransferase;	map00230	Purine metabolism	bbr	ssp	mxa	lil		lin	eco	son	ama	bba	bpa	bbr	gka	lpf	ngo	sme	cte	cli	tdn	aae	hth	nam
		x	C00130	IMP;	C04734	1-(5'-Phosphoribosyl)-5-formamido-4-imidazolecarboxamide;	3.5.4.10	IMP cyclohydrolase;	map00230	Purine metabolism	bbr	ssp	mxa	lil		lin	eco	son	ama	bba	bpa	bbr	gka	lpf	ngo	sme	cte	cli	tdn	aae	hth	nam
		x	C00046	RNA;	C00075	UTP;	2.7.7.6	DNA-directed RNA polymerase;	map00240	Pyrimidine metabolism	bbr	ssp	mxa	lil	hpa	lin	eco	son	ama	bba	bpa	bbr	gka	lpf	ngo	sme	cte	cli	tdn	aae	hth	nam
		x	C00002	ATP;	C00008	ADP;	2.7.4.6	nucleoside-diphosphate kinase;	map00230	Purine metabolism	bbr	ssp	mxa	lil	hpa	lin	eco	son	ama	bba	bpa	bbr	gka	lpf	ngo	sme	cte	cli	tdn	aae	hth	nam
		x	C00008	ADP;	C00206	dADP;	1.17.4.1	ribonucleoside-diphosphate reductase;	map00230	Purine metabolism	bbr	ssp	mxa	lil	hpa	lin	eco	son	ama	bba	bpa	bbr	gka	lpf	ngo	sme	cte	cli	tdn	aae	hth	nam
		x	C00206	dADP;	C00360	dAMP;	2.7.4.3	adenylate kinase;	map00230	Purine metabolism	bbr	ssp	mxa	lil	hpa	lin	eco	son	ama	bba	bpa	bbr	gka	lpf	ngo	sme	cte	cli	tdn	aae	hth	nam
		x	C00131	dATP;	C00206	dADP;	2.7.4.6	nucleoside-diphosphate kinase;	map00230	Purine metabolism	bbr	ssp	mxa	lil	hpa	lin	eco	son	ama	bba	bpa	bbr	gka	lpf	ngo	sme	cte	cli	tdn	aae	hth	nam
		x	C00039	DNA;	C00131	dATP;	2.7.7.7	DNA-directed DNA polymerase;	map00230	Purine metabolism	bbr	ssp	mxa	lil	hpa	lin	eco	son	ama	bba	bpa	bbr	gka	lpf	ngo	sme	cte	cli	tdn	aae	hth	nam
		x	C00039	DNA;	C00458	dCTP;	2.7.7.7	DNA-directed DNA polymerase;	map00240	Pyrimidine metabolism	bbr	ssp	mxa	lil	hpa	lin	eco	son	ama	bba	bpa	bbr	gka	lpf	ngo	sme	cte	cli	tdn	aae	hth	nam
		x	C00008	ADP;	C00020	AMP;	2.7.4.3	adenylate kinase;	map00230	Purine metabolism	bbr	ssp	mxa	lil	hpa	lin	eco	son	ama	bba	bpa	bbr	gka	lpf	ngo	sme	cte	cli	tdn	aae	hth	nam
		x	C00112	CDP;	C00705	dCDP;	1.17.4.1	ribonucleoside-diphosphate reductase;	map00240	Pyrimidine metabolism	bbr	ssp	mxa	lil	hpa	lin	eco	son	ama	bba	bpa	bbr	gka	lpf	ngo	sme	cte	cli	tdn	aae	hth	nam
		x	C00039	DNA;	C00286	dGTP;	2.7.7.7	DNA-directed DNA polymerase;	map00230	Purine metabolism	bbr	ssp	mxa	lil	hpa	lin	eco	son	ama	bba	bpa	bbr	gka	lpf	ngo	sme	cte	cli	tdn	aae	hth	nam
		x	C00239	dCMP;	C00705	dCDP;	2.7.4.14	cytidylate kinase;	map00240	Pyrimidine metabolism	bbr	ssp	mxa	lil		lin	eco	son	ama	bba	bpa	bbr	gka	lpf	ngo	sme	cte	cli		aae	hth
		x	C03838	5'-Phosphoribosylglycinamide;	C04376	5'-Phosphoribosyl-N-formylglycinamide;	2.1.2.2	phosphoribosylglycinamide formyltransferase;	map00230	Purine metabolism	bbr	ssp	mxa	lil		lin	eco	son	ama	bba	bpa	bbr	gka	lpf	ngo	sme	cte	cli	tdn	aae	hth	nam
		x	C00458	dCTP;	C00705	dCDP;	2.7.4.6	nucleoside-diphosphate kinase;	map00240	Pyrimidine metabolism	bbr	ssp	mxa	lil	hpa	lin	eco	son	ama	bba	bpa	bbr	gka	lpf	ngo	sme	cte	cli	tdn	aae	hth	nam
		x	C00039	DNA;	C00459	dTTP;	2.7.7.7	DNA-directed DNA polymerase;	map00240	Pyrimidine metabolism	bbr	ssp	mxa	lil	hpa	lin	eco	son	ama	bba	bpa	bbr	gka	lpf	ngo	sme	cte	cli	tdn	aae	hth	nam
		x	C00363	dTDP;	C00459	dTTP;	2.7.4.6	nucleoside-diphosphate kinase;	map00240	Pyrimidine metabolism	bbr	ssp	mxa	lil	hpa	lin	eco	son	ama	bba	bpa	bbr	gka	lpf	ngo	sme	cte	cli	tdn	aae	hth	nam
		x	C00363	dTDP;	C00364	dTMP;	2.7.4.9	dTMP kinase;	map00240	Pyrimidine metabolism	bbr	ssp	mxa	lil	hpa	lin	eco	son	ama	bba	bpa	bbr	gka	lpf	ngo	sme	cte	cli	tdn	aae	hth	nam
		x	C04751	1-(5-Phospho-D-ribosyl)-5-amino-4-imidazolecarboxylate;	C04823	1-(5'-Phosphoribosyl)-5-amino-4-(N-succinocarboxamide)-imidazole;	6.3.2.6	phosphoribosylaminoimidazolesuccinocarboxamide synthase;	map00230	Purine metabolism	bbr	ssp	mxa	lil		lin	eco	son	ama	bba	bpa	bbr	gka	lpf	ngo	sme	cte	cli	tdn	aae	hth	nam
Subsystem 4	0.0011258091753447786										bbr	ssp	mxa			lin	eco	son		bba	bpa	bbr	gka	lpf	ngo	sme
		i	C00022	Pyruvate;	C05125	2-(alpha-Hydroxyethyl)thiamine diphosphate;	1.2.4.1	pyruvate dehydrogenase (acetyl-transferring);	map00010; map00020; map00290; map00620; map00650	Glycolysis / Gluconeogenesis; Citrate cycle (TCA cycle); Valine, leucine and isoleucine biosynthesis; Pyruvate metabolism; Butanoate metabolism	bbr	ssp	mxa	lil		lin	eco	son	ama	bba	bpa	bbr	gka	lpf	ngo	sme					hth	nam
		s	C00105	UMP;	C00106	Uracil	2.4.2.9	uracil phosphoribosyltransferase;	map00240	Pyrimidine metabolism	bbr	ssp	mxa			lin	eco	son		bba	bpa	bbr	gka	lpf	ngo	sme				aae
		x	C00022	Pyruvate;	C00024	Acetyl-CoA;	1.8.1.4	dihydrolipoyl dehydrogenase;	map00010; map00020; map00620	Glycolysis / Gluconeogenesis; Citrate cycle (TCA cycle); Pyruvate metabolism	bbr	ssp	mxa	lil		lin	eco	son	ama	bba	bpa	bbr	gka	lpf	ngo	sme	cte	cli		aae	hth	nam
		x	C00024	Acetyl-CoA;	C03939	Acetyl-[acyl-carrier protein]	2.3.1.-	<Transferases; Acyltransferases; Transferring groups other than amino-acyl groups>	map00061	Fatty acid biosynthesis	bbr	ssp	mxa	lil	hpa	lin	eco	son		bba	bpa	bbr	gka	lpf	ngo	sme	cte	cli	tdn	aae	hth	nam
		x	C03939	Acetyl-[acyl-carrier protein]	C05744	Acetoacetyl-[acp];	2.3.1.-	<Transferases; Acyltransferases; Transferring groups other than amino-acyl groups>	map00061	Fatty acid biosynthesis	bbr	ssp	mxa	lil	hpa	lin	eco	son		bba	bpa	bbr	gka	lpf	ngo	sme	cte	cli	tdn	aae	hth	nam
		x	C00024	Acetyl-CoA;	C03939	Acetyl-[acyl-carrier protein]	2.3.1.180	beta-ketoacyl-acyl-carrier-protein synthase III;	map00061	Fatty acid biosynthesis	bbr	ssp	mxa	lil	hpa	lin	eco	son	ama	bba	bpa	bbr	gka	lpf	ngo	sme	cte	cli	tdn	aae	hth	nam
		x	C01209	Malonyl-[acyl-carrier protein]	C05744	Acetoacetyl-[acp];	2.3.1.-	<Transferases; Acyltransferases; Transferring groups other than amino-acyl groups>	map00061	Fatty acid biosynthesis	bbr	ssp	mxa	lil	hpa	lin	eco	son		bba	bpa	bbr	gka	lpf	ngo	sme	cte	cli	tdn	aae	hth	nam
		x	C01209	Malonyl-[acyl-carrier protein]	C05750	3-Oxooctanoyl-[acp];	2.3.1.-	<Transferases; Acyltransferases; Transferring groups other than amino-acyl groups>	map00061	Fatty acid biosynthesis	bbr	ssp	mxa	lil	hpa	lin	eco	son		bba	bpa	bbr	gka	lpf	ngo	sme	cte	cli	tdn	aae	hth	nam
		x	C01209	Malonyl-[acyl-carrier protein]	C05762	3-Oxohexadecanoyl-[acp];	2.3.1.-	<Transferases; Acyltransferases; Transferring groups other than amino-acyl groups>	map00061	Fatty acid biosynthesis	bbr	ssp	mxa	lil	hpa	lin	eco	son		bba	bpa	bbr	gka	lpf	ngo	sme	cte	cli	tdn	aae	hth	nam
		x	C04633	(3R)-3-Hydroxypalmitoyl-[acyl-carrier protein];	C05762	3-Oxohexadecanoyl-[acp];	2.3.1.-	<Transferases; Acyltransferases; Transferring groups other than amino-acyl groups>	map00061	Fatty acid biosynthesis	bbr	ssp	mxa	lil	hpa	lin	eco	son		bba	bpa	bbr	gka	lpf	ngo	sme	cte	cli	tdn	aae	hth	nam
		x	C01209	Malonyl-[acyl-carrier protein]	C05753	3-Oxodecanoyl-[acp];	2.3.1.-	<Transferases; Acyltransferases; Transferring groups other than amino-acyl groups>	map00061	Fatty acid biosynthesis	bbr	ssp	mxa	lil	hpa	lin	eco	son		bba	bpa	bbr	gka	lpf	ngo	sme	cte	cli	tdn	aae	hth	nam
		x	C05752	Octanoyl-[acp];	C05753	3-Oxodecanoyl-[acp];	2.3.1.179	beta-ketoacyl-acyl-carrier-protein synthase II;	map00061	Fatty acid biosynthesis	bbr	ssp	mxa	lil	hpa	lin	eco	son	ama	bba	bpa	bbr	gka	lpf	ngo	sme	cte	cli	tdn	aae	hth	nam
		x	C01209	Malonyl-[acyl-carrier protein]	C05753	3-Oxodecanoyl-[acp];	2.3.1.179	beta-ketoacyl-acyl-carrier-protein synthase II;	map00061	Fatty acid biosynthesis	bbr	ssp	mxa	lil	hpa	lin	eco	son	ama	bba	bpa	bbr	gka	lpf	ngo	sme	cte	cli	tdn	aae	hth	nam
		x	C04620	(3R)-3-Hydroxyoctanoyl-[acyl-carrier protein];	C05750	3-Oxooctanoyl-[acp];	2.3.1.-	<Transferases; Acyltransferases; Transferring groups other than amino-acyl groups>	map00061	Fatty acid biosynthesis	bbr	ssp	mxa	lil	hpa	lin	eco	son		bba	bpa	bbr	gka	lpf	ngo	sme	cte	cli	tdn	aae	hth	nam
		x	C04620	(3R)-3-Hydroxyoctanoyl-[acyl-carrier protein];	C05751	trans-Oct-2-enoyl-[acp];	2.3.1.-	<Transferases; Acyltransferases; Transferring groups other than amino-acyl groups>	map00061	Fatty acid biosynthesis	bbr	ssp	mxa	lil	hpa	lin	eco	son		bba	bpa	bbr	gka	lpf	ngo	sme	cte	cli	tdn	aae	hth	nam
		x	C01209	Malonyl-[acyl-carrier protein]	C05759	3-Oxotetradecanoyl-[acp];	2.3.1.179	beta-ketoacyl-acyl-carrier-protein synthase II;	map00061	Fatty acid biosynthesis	bbr	ssp	mxa	lil	hpa	lin	eco	son	ama	bba	bpa	bbr	gka	lpf	ngo	sme	cte	cli	tdn	aae	hth	nam
		x	C04688	(3R)-3-Hydroxytetradecanoyl-[acyl-carrier protein];	C05759	3-Oxotetradecanoyl-[acp];	2.3.1.-	<Transferases; Acyltransferases; Transferring groups other than amino-acyl groups>	map00061	Fatty acid biosynthesis	bbr	ssp	mxa	lil	hpa	lin	eco	son		bba	bpa	bbr	gka	lpf	ngo	sme	cte	cli	tdn	aae	hth	nam
		x	C05223	Dodecanoyl-[acyl-carrier protein];	C05759	3-Oxotetradecanoyl-[acp];	2.3.1.179	beta-ketoacyl-acyl-carrier-protein synthase II;	map00061	Fatty acid biosynthesis	bbr	ssp	mxa	lil	hpa	lin	eco	son	ama	bba	bpa	bbr	gka	lpf	ngo	sme	cte	cli	tdn	aae	hth	nam
		x	C05749	Hexanoyl-[acp];	C05750	3-Oxooctanoyl-[acp];	2.3.1.179	beta-ketoacyl-acyl-carrier-protein synthase II;	map00061	Fatty acid biosynthesis	bbr	ssp	mxa	lil	hpa	lin	eco	son	ama	bba	bpa	bbr	gka	lpf	ngo	sme	cte	cli	tdn	aae	hth	nam
		x	C05748	trans-Hex-2-enoyl-[acp];	C05749	Hexanoyl-[acp];	2.3.1.-	<Transferases; Acyltransferases; Transferring groups other than amino-acyl groups>	map00061	Fatty acid biosynthesis	bbr	ssp	mxa	lil	hpa	lin	eco	son		bba	bpa	bbr	gka	lpf	ngo	sme	cte	cli	tdn	aae	hth	nam
		x	C01209	Malonyl-[acyl-carrier protein]	C05759	3-Oxotetradecanoyl-[acp];	2.3.1.-	<Transferases; Acyltransferases; Transferring groups other than amino-acyl groups>	map00061	Fatty acid biosynthesis	bbr	ssp	mxa	lil	hpa	lin	eco	son		bba	bpa	bbr	gka	lpf	ngo	sme	cte	cli	tdn	aae	hth	nam
		x	C00015	UDP;	C00105	UMP;	2.7.4.14	cytidylate kinase;	map00240	Pyrimidine metabolism	bbr	ssp	mxa	lil		lin	eco	son	ama	bba	bpa	bbr	gka	lpf	ngo	sme	cte	cli		aae	hth
		x	C03939	Acetyl-[acyl-carrier protein]	C05744	Acetoacetyl-[acp];	2.3.1.180	beta-ketoacyl-acyl-carrier-protein synthase III;	map00061	Fatty acid biosynthesis	bbr	ssp	mxa	lil	hpa	lin	eco	son	ama	bba	bpa	bbr	gka	lpf	ngo	sme	cte	cli	tdn	aae	hth	nam
		x	C03939	Acetyl-[acyl-carrier protein]	C05744	Acetoacetyl-[acp];	2.3.1.179	beta-ketoacyl-acyl-carrier-protein synthase II;	map00061	Fatty acid biosynthesis	bbr	ssp	mxa	lil	hpa	lin	eco	son	ama	bba	bpa	bbr	gka	lpf	ngo	sme	cte	cli	tdn	aae	hth	nam
		x	C01209	Malonyl-[acyl-carrier protein]	C05756	3-Oxododecanoyl-[acp];	2.3.1.179	beta-ketoacyl-acyl-carrier-protein synthase II;	map00061	Fatty acid biosynthesis	bbr	ssp	mxa	lil	hpa	lin	eco	son	ama	bba	bpa	bbr	gka	lpf	ngo	sme	cte	cli	tdn	aae	hth	nam
		x	C05755	Decanoyl-[acp];	C05756	3-Oxododecanoyl-[acp];	2.3.1.179	beta-ketoacyl-acyl-carrier-protein synthase II;	map00061	Fatty acid biosynthesis	bbr	ssp	mxa	lil	hpa	lin	eco	son	ama	bba	bpa	bbr	gka	lpf	ngo	sme	cte	cli	tdn	aae	hth	nam
		x	C05754	trans-Dec-2-enoyl-[acp];	C05755	Decanoyl-[acp];	2.3.1.-	<Transferases; Acyltransferases; Transferring groups other than amino-acyl groups>	map00061	Fatty acid biosynthesis	bbr	ssp	mxa	lil	hpa	lin	eco	son		bba	bpa	bbr	gka	lpf	ngo	sme	cte	cli	tdn	aae	hth	nam
		x	C05756	3-Oxododecanoyl-[acp];	C05757	(R)-3-Hydroxydodecanoyl-[acp];	2.3.1.-	<Transferases; Acyltransferases; Transferring groups other than amino-acyl groups>	map00061	Fatty acid biosynthesis	bbr	ssp	mxa	lil	hpa	lin	eco	son		bba	bpa	bbr	gka	lpf	ngo	sme	cte	cli	tdn	aae	hth	nam
		x	C05757	(R)-3-Hydroxydodecanoyl-[acp];	C05758	trans-Dodec-2-enoyl-[acp];	2.3.1.-	<Transferases; Acyltransferases; Transferring groups other than amino-acyl groups>	map00061	Fatty acid biosynthesis	bbr	ssp	mxa	lil	hpa	lin	eco	son		bba	bpa	bbr	gka	lpf	ngo	sme	cte	cli	tdn	aae	hth	nam
		x	C04633	(3R)-3-Hydroxypalmitoyl-[acyl-carrier protein];	C05763	trans-Hexadec-2-enoyl-[acp];	2.3.1.-	<Transferases; Acyltransferases; Transferring groups other than amino-acyl groups>	map00061	Fatty acid biosynthesis	bbr	ssp	mxa	lil	hpa	lin	eco	son		bba	bpa	bbr	gka	lpf	ngo	sme	cte	cli	tdn	aae	hth	nam
		x	C05749	Hexanoyl-[acp];	C05750	3-Oxooctanoyl-[acp];	2.3.1.-	<Transferases; Acyltransferases; Transferring groups other than amino-acyl groups>	map00061	Fatty acid biosynthesis	bbr	ssp	mxa	lil	hpa	lin	eco	son		bba	bpa	bbr	gka	lpf	ngo	sme	cte	cli	tdn	aae	hth	nam
		x	C00083	Malonyl-CoA;	C01209	Malonyl-[acyl-carrier protein]	2.3.1.39	[acyl-carrier-protein] S-malonyltransferase;	map00061	Fatty acid biosynthesis	bbr	ssp	mxa		hpa	lin	eco	son	ama	bba	bpa	bbr	gka	lpf	ngo	sme	cte	cli	tdn	aae	hth	nam
		x	C01209	Malonyl-[acyl-carrier protein]	C05746	3-Oxohexanoyl-[acp];	2.3.1.-	<Transferases; Acyltransferases; Transferring groups other than amino-acyl groups>	map00061	Fatty acid biosynthesis	bbr	ssp	mxa	lil	hpa	lin	eco	son		bba	bpa	bbr	gka	lpf	ngo	sme	cte	cli	tdn	aae	hth	nam
		x	C05746	3-Oxohexanoyl-[acp];	C05747	(R)-3-Hydroxyhexanoyl-[acp];	1.1.1.100	3-oxoacyl-[acyl-carrier-protein] reductase;	map00061	Fatty acid biosynthesis	bbr	ssp	mxa	lil	hpa	lin	eco	son	ama	bba	bpa	bbr	gka	lpf	ngo	sme	cte	cli	tdn	aae	hth	nam
		x	C05755	Decanoyl-[acp];	C05756	3-Oxododecanoyl-[acp];	2.3.1.-	<Transferases; Acyltransferases; Transferring groups other than amino-acyl groups>	map00061	Fatty acid biosynthesis	bbr	ssp	mxa	lil	hpa	lin	eco	son		bba	bpa	bbr	gka	lpf	ngo	sme	cte	cli	tdn	aae	hth	nam
		x	C05747	(R)-3-Hydroxyhexanoyl-[acp];	C05748	trans-Hex-2-enoyl-[acp];	2.3.1.-	<Transferases; Acyltransferases; Transferring groups other than amino-acyl groups>	map00061	Fatty acid biosynthesis	bbr	ssp	mxa	lil	hpa	lin	eco	son		bba	bpa	bbr	gka	lpf	ngo	sme	cte	cli	tdn	aae	hth	nam
		x	C00022	Pyruvate;	C00024	Acetyl-CoA;	2.3.1.12	dihydrolipoyllysine-residue acetyltransferase;	map00010; map00020; map00620	Glycolysis / Gluconeogenesis; Citrate cycle (TCA cycle); Pyruvate metabolism	bbr	ssp	mxa	lil		lin	eco	son	ama	bba	bpa	bbr	gka	lpf	ngo	sme					hth	nam
		x	C01209	Malonyl-[acyl-carrier protein]	C05746	3-Oxohexanoyl-[acp];	2.3.1.179	beta-ketoacyl-acyl-carrier-protein synthase II;	map00061	Fatty acid biosynthesis	bbr	ssp	mxa	lil	hpa	lin	eco	son	ama	bba	bpa	bbr	gka	lpf	ngo	sme	cte	cli	tdn	aae	hth	nam
		x	C04688	(3R)-3-Hydroxytetradecanoyl-[acyl-carrier protein];	C05760	trans-Tetradec-2-enoyl-[acp];	2.3.1.-	<Transferases; Acyltransferases; Transferring groups other than amino-acyl groups>	map00061	Fatty acid biosynthesis	bbr	ssp	mxa	lil	hpa	lin	eco	son		bba	bpa	bbr	gka	lpf	ngo	sme	cte	cli	tdn	aae	hth	nam
		x	C05760	trans-Tetradec-2-enoyl-[acp];	C05761	Tetradecanoyl-[acp];	2.3.1.-	<Transferases; Acyltransferases; Transferring groups other than amino-acyl groups>	map00061	Fatty acid biosynthesis	bbr	ssp	mxa	lil	hpa	lin	eco	son		bba	bpa	bbr	gka	lpf	ngo	sme	cte	cli	tdn	aae	hth	nam
		x	C05751	trans-Oct-2-enoyl-[acp];	C05752	Octanoyl-[acp];	2.3.1.-	<Transferases; Acyltransferases; Transferring groups other than amino-acyl groups>	map00061	Fatty acid biosynthesis	bbr	ssp	mxa	lil	hpa	lin	eco	son		bba	bpa	bbr	gka	lpf	ngo	sme	cte	cli	tdn	aae	hth	nam
		x	C01209	Malonyl-[acyl-carrier protein]	C05744	Acetoacetyl-[acp];	2.3.1.179	beta-ketoacyl-acyl-carrier-protein synthase II;	map00061	Fatty acid biosynthesis	bbr	ssp	mxa	lil	hpa	lin	eco	son	ama	bba	bpa	bbr	gka	lpf	ngo	sme	cte	cli	tdn	aae	hth	nam
		x	C00022	Pyruvate;	C00074	Phosphoenolpyruvate;	2.7.1.40	pyruvate kinase;	map00010; map00620; map00710	Glycolysis / Gluconeogenesis; Pyruvate metabolism; Carbon fixation in photosynthetic organisms	bbr	ssp	mxa	lil		lin	eco	son		bba	bpa	bbr	gka	lpf	ngo	sme						nam
		x	C01209	Malonyl-[acyl-carrier protein]	C05756	3-Oxododecanoyl-[acp];	2.3.1.-	<Transferases; Acyltransferases; Transferring groups other than amino-acyl groups>	map00061	Fatty acid biosynthesis	bbr	ssp	mxa	lil	hpa	lin	eco	son		bba	bpa	bbr	gka	lpf	ngo	sme	cte	cli	tdn	aae	hth	nam
		x	C01209	Malonyl-[acyl-carrier protein]	C05750	3-Oxooctanoyl-[acp];	2.3.1.179	beta-ketoacyl-acyl-carrier-protein synthase II;	map00061	Fatty acid biosynthesis	bbr	ssp	mxa	lil	hpa	lin	eco	son	ama	bba	bpa	bbr	gka	lpf	ngo	sme	cte	cli	tdn	aae	hth	nam
		x	C00024	Acetyl-CoA;	C00158	Citrate;	2.3.3.1	citrate (Si)-synthase;	map00020; map00630	Citrate cycle (TCA cycle); Glyoxylate and dicarboxylate metabolism	bbr	ssp	mxa	lil	hpa	lin	eco	son	ama	bba	bpa	bbr	gka	lpf	ngo	sme	cte	cli	tdn	aae	hth
		x	C00158	Citrate;	C00417	cis-Aconitate;	4.2.1.3	aconitate hydratase;	map00020; map00630; map00720	Citrate cycle (TCA cycle); Glyoxylate and dicarboxylate metabolism; Reductive carboxylate cycle (CO2 fixation)	bbr	ssp	mxa	lil	hpa	lin	eco	son	ama	bba	bpa	bbr	gka	lpf	ngo	sme	cte	cli	tdn	aae	hth	nam
		x	C00036	Oxaloacetate;	C00158	Citrate;	2.3.3.1	citrate (Si)-synthase;	map00020; map00630	Citrate cycle (TCA cycle); Glyoxylate and dicarboxylate metabolism	bbr	ssp	mxa	lil	hpa	lin	eco	son	ama	bba	bpa	bbr	gka	lpf	ngo	sme	cte	cli	tdn	aae	hth
		x	C01209	Malonyl-[acyl-carrier protein]	C05744	Acetoacetyl-[acp];	2.3.1.180	beta-ketoacyl-acyl-carrier-protein synthase III;	map00061	Fatty acid biosynthesis	bbr	ssp	mxa	lil	hpa	lin	eco	son	ama	bba	bpa	bbr	gka	lpf	ngo	sme	cte	cli	tdn	aae	hth	nam
		x	C00105	UMP;	C01103	Orotidine 5'-phosphate;	4.1.1.23	orotidine-5'-phosphate decarboxylase;	map00240	Pyrimidine metabolism	bbr	ssp	mxa	lil	hpa	lin	eco	son	ama	bba	bpa	bbr	gka	lpf	ngo	sme	cte	cli	tdn	aae	hth	nam
		x	C05746	3-Oxohexanoyl-[acp];	C05747	(R)-3-Hydroxyhexanoyl-[acp];	2.3.1.-	<Transferases; Acyltransferases; Transferring groups other than amino-acyl groups>	map00061	Fatty acid biosynthesis	bbr	ssp	mxa	lil	hpa	lin	eco	son		bba	bpa	bbr	gka	lpf	ngo	sme	cte	cli	tdn	aae	hth	nam
		x	C04619	(3R)-3-Hydroxydecanoyl-[acyl-carrier protein];	C05753	3-Oxodecanoyl-[acp];	1.1.1.100	3-oxoacyl-[acyl-carrier-protein] reductase;	map00061	Fatty acid biosynthesis	bbr	ssp	mxa	lil	hpa	lin	eco	son	ama	bba	bpa	bbr	gka	lpf	ngo	sme	cte	cli	tdn	aae	hth	nam
		x	C00022	Pyruvate;	C00024	Acetyl-CoA;	1.2.4.1	pyruvate dehydrogenase (acetyl-transferring);	map00010; map00020; map00290; map00620; map00650	Glycolysis / Gluconeogenesis; Citrate cycle (TCA cycle); Valine, leucine and isoleucine biosynthesis; Pyruvate metabolism; Butanoate metabolism	bbr	ssp	mxa	lil		lin	eco	son	ama	bba	bpa	bbr	gka	lpf	ngo	sme					hth	nam
		x	C00074	Phosphoenolpyruvate;	C04691	2-Dehydro-3-deoxy-D-arabino-heptonate 7-phosphate;	2.5.1.54	3-deoxy-7-phosphoheptulonate synthase;	map00400	Phenylalanine, tyrosine and tryptophan biosynthesis	bbr	ssp	mxa	lil	hpa	lin	eco	son		bba	bpa	bbr	gka	lpf	ngo	sme	cte	cli	tdn			nam
		x	C00944	3-Dehydroquinate;	C04691	2-Dehydro-3-deoxy-D-arabino-heptonate 7-phosphate;	4.2.3.4	3-dehydroquinate synthase;	map00400	Phenylalanine, tyrosine and tryptophan biosynthesis	bbr	ssp	mxa	lil	hpa	lin	eco	son		bba	bpa	bbr	gka	lpf	ngo	sme	cte	cli	tdn			nam
		x	C00279	D-Erythrose 4-phosphate	C04691	2-Dehydro-3-deoxy-D-arabino-heptonate 7-phosphate;	2.5.1.54	3-deoxy-7-phosphoheptulonate synthase;	map00400	Phenylalanine, tyrosine and tryptophan biosynthesis	bbr	ssp	mxa	lil	hpa	lin	eco	son		bba	bpa	bbr	gka	lpf	ngo	sme	cte	cli	tdn			nam
		x	C00118	D-Glyceraldehyde 3-phosphate;	C00279	D-Erythrose 4-phosphate	2.2.1.1	transketolase;	map00030; map00710	Pentose phosphate pathway; Carbon fixation in photosynthetic organisms	bbr	ssp	mxa	lil	hpa	lin	eco	son	ama	bba	bpa	bbr	gka	lpf	ngo	sme	cte	cli	tdn	aae	hth	nam
		x	C00118	D-Glyceraldehyde 3-phosphate;	C00231	D-Xylulose 5-phosphate	2.2.1.1	transketolase;	map00030; map00710	Pentose phosphate pathway; Carbon fixation in photosynthetic organisms	bbr	ssp	mxa	lil	hpa	lin	eco	son	ama	bba	bpa	bbr	gka	lpf	ngo	sme	cte	cli	tdn	aae	hth	nam
		x	C00199	D-Ribulose 5-phosphate	C00231	D-Xylulose 5-phosphate	5.1.3.1	ribulose-phosphate 3-epimerase;	map00030; map00040; map00710	Pentose phosphate pathway; Pentose and glucuronate interconversions; Carbon fixation in photosynthetic organisms	bbr	ssp	mxa	lil	hpa	lin	eco	son	ama	bba	bpa	bbr	gka	lpf	ngo	sme	cte	cli	tdn	aae	hth	nam
		x	C00231	D-Xylulose 5-phosphate	C05345	beta-D-Fructose 6-phosphate	2.2.1.1	transketolase;	map00030	Pentose phosphate pathway	bbr	ssp	mxa	lil	hpa	lin	eco	son	ama	bba	bpa	bbr	gka	lpf	ngo	sme	cte	cli	tdn	aae	hth	nam
		x	C00668	alpha-D-Glucose 6-phosphate	C05345	beta-D-Fructose 6-phosphate	5.3.1.9	glucose-6-phosphate isomerase;	map00010; map00030; map00500; map00520	Glycolysis / Gluconeogenesis; Pentose phosphate pathway; Starch and sucrose metabolism; Amino sugar and nucleotide sugar metabolism	bbr	ssp	mxa	lil	hpa	lin	eco	son		bba	bpa	bbr	gka	lpf	ngo	sme	cte	cli	tdn	aae	hth	nam
		x	C00118	D-Glyceraldehyde 3-phosphate;	C00236	3-Phospho-D-glyceroyl phosphate;	1.2.1.12	glyceraldehyde-3-phosphate dehydrogenase (phosphorylating);	map00010	Glycolysis / Gluconeogenesis	bbr	ssp	mxa	lil	hpa	lin	eco	son	ama	bba	bpa	bbr	gka	lpf	ngo	sme	cte	cli	tdn	aae	hth	nam
		x	C00231	D-Xylulose 5-phosphate	C05382	Sedoheptulose 7-phosphate;	2.2.1.1	transketolase;	map00030; map00710	Pentose phosphate pathway; Carbon fixation in photosynthetic organisms	bbr	ssp	mxa	lil	hpa	lin	eco	son	ama	bba	bpa	bbr	gka	lpf	ngo	sme	cte	cli	tdn	aae	hth	nam
		x	C00668	alpha-D-Glucose 6-phosphate	C01172	beta-D-Glucose 6-phosphate	5.3.1.9	glucose-6-phosphate isomerase;	map00010; map00030; map00500	Glycolysis / Gluconeogenesis; Pentose phosphate pathway; Starch and sucrose metabolism	bbr	ssp	mxa	lil	hpa	lin	eco	son		bba	bpa	bbr	gka	lpf	ngo	sme	cte	cli	tdn	aae	hth	nam
		x	C00197	3-Phospho-D-glycerate;	C00236	3-Phospho-D-glyceroyl phosphate;	2.7.2.3	phosphoglycerate kinase;	map00010; map00710	Glycolysis / Gluconeogenesis; Carbon fixation in photosynthetic organisms	bbr	ssp	mxa	lil	hpa	lin	eco	son	ama	bba	bpa	bbr	gka	lpf	ngo	sme	cte	cli	tdn	aae	hth	nam
		x	C00197	3-Phospho-D-glycerate;	C00631	2-Phospho-D-glycerate;	5.4.2.1	phosphoglycerate mutase;	map00010	Glycolysis / Gluconeogenesis	bbr	ssp	mxa	lil	hpa	lin	eco	son	ama	bba	bpa	bbr	gka	lpf	ngo	sme	cte	cli	tdn	aae	hth	nam
		x	C01172	beta-D-Glucose 6-phosphate	C05345	beta-D-Fructose 6-phosphate	5.3.1.9	glucose-6-phosphate isomerase;	map00010; map00030; map00500	Glycolysis / Gluconeogenesis; Pentose phosphate pathway; Starch and sucrose metabolism	bbr	ssp	mxa	lil	hpa	lin	eco	son		bba	bpa	bbr	gka	lpf	ngo	sme	cte	cli	tdn	aae	hth	nam
		x	C00118	D-Glyceraldehyde 3-phosphate;	C05378	beta-D-Fructose 1,6-bisphosphate	4.1.2.13	fructose-bisphosphate aldolase;	map00010; map00030; map00051	Glycolysis / Gluconeogenesis; Pentose phosphate pathway; Fructose and mannose metabolism	bbr	ssp	mxa	lil	hpa	lin	eco	son	ama	bba	bpa	bbr	gka	lpf	ngo	sme	cte	cli	tdn	aae	hth	nam
		x	C00117	D-Ribose 5-phosphate;	C00118	D-Glyceraldehyde 3-phosphate;	2.2.1.1	transketolase;	map00030; map00710	Pentose phosphate pathway; Carbon fixation in photosynthetic organisms	bbr	ssp	mxa	lil	hpa	lin	eco	son	ama	bba	bpa	bbr	gka	lpf	ngo	sme	cte	cli	tdn	aae	hth	nam
		x	C00117	D-Ribose 5-phosphate;	C00119	5-Phospho-alpha-D-ribose 1-diphosphate;	2.7.6.1	ribose-phosphate diphosphokinase;	map00030; map00230	Pentose phosphate pathway; Purine metabolism	bbr	ssp	mxa	lil	hpa	lin	eco	son	ama	bba	bpa	bbr	gka	lpf	ngo	sme	cte	cli	tdn	aae	hth	nam
		x	C00119	5-Phospho-alpha-D-ribose 1-diphosphate;	C03090	5-Phosphoribosylamine;	2.4.2.14	amidophosphoribosyltransferase;	map00230	Purine metabolism	bbr	ssp	mxa	lil		lin	eco	son	ama	bba	bpa	bbr	gka	lpf	ngo	sme	cte	cli	tdn	aae	hth	nam
		x	C03090	5-Phosphoribosylamine;	C03838	5'-Phosphoribosylglycinamide;	6.3.4.13	phosphoribosylamine---glycine ligase;	map00230	Purine metabolism	bbr	ssp	mxa	lil	hpa	lin	eco	son	ama	bba	bpa	bbr	gka	lpf	ngo	sme	cte	cli	tdn	aae	hth	nam
		x	C01209	Malonyl-[acyl-carrier protein]	C05762	3-Oxohexadecanoyl-[acp];	2.3.1.179	beta-ketoacyl-acyl-carrier-protein synthase II;	map00061	Fatty acid biosynthesis	bbr	ssp	mxa	lil	hpa	lin	eco	son	ama	bba	bpa	bbr	gka	lpf	ngo	sme	cte	cli	tdn	aae	hth	nam
		x	C04619	(3R)-3-Hydroxydecanoyl-[acyl-carrier protein];	C05754	trans-Dec-2-enoyl-[acp];	2.3.1.-	<Transferases; Acyltransferases; Transferring groups other than amino-acyl groups>	map00061	Fatty acid biosynthesis	bbr	ssp	mxa	lil	hpa	lin	eco	son		bba	bpa	bbr	gka	lpf	ngo	sme	cte	cli	tdn	aae	hth	nam
		x	C00015	UDP;	C00075	UTP;	2.7.4.6	nucleoside-diphosphate kinase;	map00240	Pyrimidine metabolism	bbr	ssp	mxa	lil	hpa	lin	eco	son	ama	bba	bpa	bbr	gka	lpf	ngo	sme	cte	cli	tdn	aae	hth	nam
		x	C00063	CTP;	C00075	UTP;	6.3.4.2	CTP synthase;	map00240	Pyrimidine metabolism	bbr	ssp	mxa	lil	hpa	lin	eco	son	ama	bba	bpa	bbr	gka	lpf	ngo	sme	cte	cli	tdn	aae	hth	nam
		x	C00063	CTP;	C00112	CDP;	2.7.4.6	nucleoside-diphosphate kinase;	map00240	Pyrimidine metabolism	bbr	ssp	mxa	lil	hpa	lin	eco	son	ama	bba	bpa	bbr	gka	lpf	ngo	sme	cte	cli	tdn	aae	hth	nam
		x	C00055	CMP;	C00112	CDP;	2.7.4.14	cytidylate kinase;	map00240	Pyrimidine metabolism	bbr	ssp	mxa	lil		lin	eco	son	ama	bba	bpa	bbr	gka	lpf	ngo	sme	cte	cli		aae	hth
		x	C00046	RNA;	C00063	CTP;	2.7.7.6	DNA-directed RNA polymerase;	map00240	Pyrimidine metabolism	bbr	ssp	mxa	lil	hpa	lin	eco	son	ama	bba	bpa	bbr	gka	lpf	ngo	sme	cte	cli	tdn	aae	hth	nam
		x	C00002	ATP;	C00046	RNA;	2.7.7.6	DNA-directed RNA polymerase;	map00230	Purine metabolism	bbr	ssp	mxa	lil	hpa	lin	eco	son	ama	bba	bpa	bbr	gka	lpf	ngo	sme	cte	cli	tdn	aae	hth	nam
		x	C00044	GTP;	C00046	RNA;	2.7.7.6	DNA-directed RNA polymerase;	map00230	Purine metabolism	bbr	ssp	mxa	lil	hpa	lin	eco	son	ama	bba	bpa	bbr	gka	lpf	ngo	sme	cte	cli	tdn	aae	hth	nam
		x	C00035	GDP;	C00044	GTP;	2.7.4.6	nucleoside-diphosphate kinase;	map00230	Purine metabolism	bbr	ssp	mxa	lil	hpa	lin	eco	son	ama	bba	bpa	bbr	gka	lpf	ngo	sme	cte	cli	tdn	aae	hth	nam
		x	C00035	GDP;	C00361	dGDP;	1.17.4.1	ribonucleoside-diphosphate reductase;	map00230	Purine metabolism	bbr	ssp	mxa	lil	hpa	lin	eco	son	ama	bba	bpa	bbr	gka	lpf	ngo	sme	cte	cli	tdn	aae	hth	nam
		x	C00286	dGTP;	C00361	dGDP;	2.7.1.40	pyruvate kinase;	map00230	Purine metabolism	bbr	ssp	mxa	lil		lin	eco	son		bba	bpa	bbr	gka	lpf	ngo	sme						nam
		x	C00039	DNA;	C00286	dGTP;	2.7.7.7	DNA-directed DNA polymerase;	map00230	Purine metabolism	bbr	ssp	mxa	lil	hpa	lin	eco	son	ama	bba	bpa	bbr	gka	lpf	ngo	sme	cte	cli	tdn	aae	hth	nam
		x	C00039	DNA;	C00458	dCTP;	2.7.7.7	DNA-directed DNA polymerase;	map00240	Pyrimidine metabolism	bbr	ssp	mxa	lil	hpa	lin	eco	son	ama	bba	bpa	bbr	gka	lpf	ngo	sme	cte	cli	tdn	aae	hth	nam
		x	C00458	dCTP;	C00705	dCDP;	2.7.4.6	nucleoside-diphosphate kinase;	map00240	Pyrimidine metabolism	bbr	ssp	mxa	lil	hpa	lin	eco	son	ama	bba	bpa	bbr	gka	lpf	ngo	sme	cte	cli	tdn	aae	hth	nam
		x	C00239	dCMP;	C00705	dCDP;	2.7.4.14	cytidylate kinase;	map00240	Pyrimidine metabolism	bbr	ssp	mxa	lil		lin	eco	son	ama	bba	bpa	bbr	gka	lpf	ngo	sme	cte	cli		aae	hth
		x	C00039	DNA;	C00459	dTTP;	2.7.7.7	DNA-directed DNA polymerase;	map00240	Pyrimidine metabolism	bbr	ssp	mxa	lil	hpa	lin	eco	son	ama	bba	bpa	bbr	gka	lpf	ngo	sme	cte	cli	tdn	aae	hth	nam
		x	C00363	dTDP;	C00459	dTTP;	2.7.4.6	nucleoside-diphosphate kinase;	map00240	Pyrimidine metabolism	bbr	ssp	mxa	lil	hpa	lin	eco	son	ama	bba	bpa	bbr	gka	lpf	ngo	sme	cte	cli	tdn	aae	hth	nam
		x	C00363	dTDP;	C00364	dTMP;	2.7.4.9	dTMP kinase;	map00240	Pyrimidine metabolism	bbr	ssp	mxa	lil	hpa	lin	eco	son	ama	bba	bpa	bbr	gka	lpf	ngo	sme	cte	cli	tdn	aae	hth	nam
		x	C00035	GDP;	C00144	GMP;	2.7.4.8	guanylate kinase;	map00230	Purine metabolism	bbr	ssp	mxa	lil	hpa	lin	eco	son	ama	bba	bpa	bbr	gka	lpf	ngo	sme	cte	cli	tdn	aae	hth	nam
		x	C00286	dGTP;	C00361	dGDP;	2.7.4.6	nucleoside-diphosphate kinase;	map00230	Purine metabolism	bbr	ssp	mxa	lil	hpa	lin	eco	son	ama	bba	bpa	bbr	gka	lpf	ngo	sme	cte	cli	tdn	aae	hth	nam
		x	C00364	dTMP;	C00365	dUMP;	2.1.1.45	thymidylate synthase;	map00240	Pyrimidine metabolism	bbr	ssp	mxa	lil		lin	eco	son		bba	bpa	bbr	gka	lpf	ngo	sme
		x	C00365	dUMP;	C01346	dUDP;	2.7.4.9	dTMP kinase;	map00240	Pyrimidine metabolism	bbr	ssp	mxa	lil	hpa	lin	eco	son	ama	bba	bpa	bbr	gka	lpf	ngo	sme	cte	cli	tdn	aae	hth	nam
		x	C00460	dUTP;	C01346	dUDP;	2.7.4.6	nucleoside-diphosphate kinase;	map00240	Pyrimidine metabolism	bbr	ssp	mxa	lil	hpa	lin	eco	son	ama	bba	bpa	bbr	gka	lpf	ngo	sme	cte	cli	tdn	aae	hth	nam
		x	C00039	DNA;	C00131	dATP;	2.7.7.7	DNA-directed DNA polymerase;	map00230	Purine metabolism	bbr	ssp	mxa	lil	hpa	lin	eco	son	ama	bba	bpa	bbr	gka	lpf	ngo	sme	cte	cli	tdn	aae	hth	nam
		x	C00131	dATP;	C00206	dADP;	2.7.1.40	pyruvate kinase;	map00230	Purine metabolism	bbr	ssp	mxa	lil		lin	eco	son		bba	bpa	bbr	gka	lpf	ngo	sme						nam
		x	C00206	dADP;	C00360	dAMP;	2.7.4.3	adenylate kinase;	map00230	Purine metabolism	bbr	ssp	mxa	lil	hpa	lin	eco	son	ama	bba	bpa	bbr	gka	lpf	ngo	sme	cte	cli	tdn	aae	hth	nam
		x	C00008	ADP;	C00206	dADP;	1.17.4.1	ribonucleoside-diphosphate reductase;	map00230	Purine metabolism	bbr	ssp	mxa	lil	hpa	lin	eco	son	ama	bba	bpa	bbr	gka	lpf	ngo	sme	cte	cli	tdn	aae	hth	nam
		x	C00119	5-Phospho-alpha-D-ribose 1-diphosphate;	C01103	Orotidine 5'-phosphate;	2.4.2.10	orotate phosphoribosyltransferase;	map00240	Pyrimidine metabolism	bbr	ssp	mxa	lil	hpa	lin	eco	son	ama	bba	bpa	bbr	gka	lpf	ngo	sme	cte	cli	tdn	aae	hth	nam
		x	C04633	(3R)-3-Hydroxypalmitoyl-[acyl-carrier protein];	C05762	3-Oxohexadecanoyl-[acp];	1.1.1.100	3-oxoacyl-[acyl-carrier-protein] reductase;	map00061	Fatty acid biosynthesis	bbr	ssp	mxa	lil	hpa	lin	eco	son	ama	bba	bpa	bbr	gka	lpf	ngo	sme	cte	cli	tdn	aae	hth	nam
		x	C00361	dGDP;	C00362	dGMP;	2.7.4.8	guanylate kinase;	map00230	Purine metabolism	bbr	ssp	mxa	lil	hpa	lin	eco	son	ama	bba	bpa	bbr	gka	lpf	ngo	sme	cte	cli	tdn	aae	hth	nam
		x	C05756	3-Oxododecanoyl-[acp];	C05757	(R)-3-Hydroxydodecanoyl-[acp];	1.1.1.100	3-oxoacyl-[acyl-carrier-protein] reductase;	map00061	Fatty acid biosynthesis	bbr	ssp	mxa	lil	hpa	lin	eco	son	ama	bba	bpa	bbr	gka	lpf	ngo	sme	cte	cli	tdn	aae	hth	nam
		x	C04618	(3R)-3-Hydroxybutanoyl-[acyl-carrier protein];	C05744	Acetoacetyl-[acp];	2.3.1.-	<Transferases; Acyltransferases; Transferring groups other than amino-acyl groups>	map00061	Fatty acid biosynthesis	bbr	ssp	mxa	lil	hpa	lin	eco	son		bba	bpa	bbr	gka	lpf	ngo	sme	cte	cli	tdn	aae	hth	nam
		x	C04246	But-2-enoyl-[acyl-carrier protein]	C04618	(3R)-3-Hydroxybutanoyl-[acyl-carrier protein];	2.3.1.-	<Transferases; Acyltransferases; Transferring groups other than amino-acyl groups>	map00061	Fatty acid biosynthesis	bbr	ssp	mxa	lil	hpa	lin	eco	son		bba	bpa	bbr	gka	lpf	ngo	sme	cte	cli	tdn	aae	hth	nam
		x	C04246	But-2-enoyl-[acyl-carrier protein]	C05745	Butyryl-[acp];	2.3.1.-	<Transferases; Acyltransferases; Transferring groups other than amino-acyl groups>	map00061	Fatty acid biosynthesis	bbr	ssp	mxa	lil	hpa	lin	eco	son		bba	bpa	bbr	gka	lpf	ngo	sme	cte	cli	tdn	aae	hth	nam
		x	C00131	dATP;	C00206	dADP;	2.7.4.6	nucleoside-diphosphate kinase;	map00230	Purine metabolism	bbr	ssp	mxa	lil	hpa	lin	eco	son	ama	bba	bpa	bbr	gka	lpf	ngo	sme	cte	cli	tdn	aae	hth	nam
		x	C00352	D-Glucosamine 6-phosphate;	C05345	beta-D-Fructose 6-phosphate	3.5.1.-	<Hydrolases; Acting on carbon-nitrogen bonds, other than peptide bonds; In linear amides>	map00520	Amino sugar and nucleotide sugar metabolism	bbr	ssp	mxa	lil	hpa	lin	eco	son		bba	bpa	bbr	gka	lpf	ngo	sme	cte	cli	tdn	aae	hth	nam
		x	C00352	D-Glucosamine 6-phosphate;	C06156	alpha-D-Glucosamine 1-phosphate;	5.4.2.10	phosphoglucosamine mutase	map00520	Amino sugar and nucleotide sugar metabolism	bbr	ssp	mxa		hpa	lin	eco	son	ama	bba	bpa	bbr	gka	lpf	ngo	sme			tdn			nam
		x	C05745	Butyryl-[acp];	C05746	3-Oxohexanoyl-[acp];	2.3.1.179	beta-ketoacyl-acyl-carrier-protein synthase II;	map00061	Fatty acid biosynthesis	bbr	ssp	mxa	lil	hpa	lin	eco	son	ama	bba	bpa	bbr	gka	lpf	ngo	sme	cte	cli	tdn	aae	hth	nam
		x	C05752	Octanoyl-[acp];	C05753	3-Oxodecanoyl-[acp];	2.3.1.-	<Transferases; Acyltransferases; Transferring groups other than amino-acyl groups>	map00061	Fatty acid biosynthesis	bbr	ssp	mxa	lil	hpa	lin	eco	son		bba	bpa	bbr	gka	lpf	ngo	sme	cte	cli	tdn	aae	hth	nam
		x	C00144	GMP;	C00655	Xanthosine 5'-phosphate;	6.3.5.2	GMP synthase (glutamine-hydrolysing);	map00230	Purine metabolism	bbr	ssp	mxa	lil	hpa	lin	eco	son	ama	bba	bpa	bbr	gka	lpf	ngo	sme	cte	cli	tdn	aae	hth	nam
		x	C00130	IMP;	C00655	Xanthosine 5'-phosphate;	1.1.1.205	IMP dehydrogenase;	map00230	Purine metabolism	bbr	ssp	mxa	lil	hpa	lin	eco	son	ama	bba	bpa	bbr	gka	lpf	ngo	sme	cte	cli	tdn	aae	hth	nam
		x	C00130	IMP;	C04734	1-(5'-Phosphoribosyl)-5-formamido-4-imidazolecarboxamide;	3.5.4.10	IMP cyclohydrolase;	map00230	Purine metabolism	bbr	ssp	mxa	lil		lin	eco	son	ama	bba	bpa	bbr	gka	lpf	ngo	sme	cte	cli	tdn	aae	hth	nam
		x	C04677	1-(5'-Phosphoribosyl)-5-amino-4-imidazolecarboxamide;	C04734	1-(5'-Phosphoribosyl)-5-formamido-4-imidazolecarboxamide;	6.3.4.-	<Ligases; Forming carbon-nitrogen bonds; Other carbon--nitrogen ligases>	map00230	Purine metabolism	bbr	ssp	mxa	lil	hpa	lin	eco	son	ama	bba	bpa	bbr	gka	lpf	ngo	sme	cte	cli	tdn	aae	hth	nam
		x	C04677	1-(5'-Phosphoribosyl)-5-amino-4-imidazolecarboxamide;	C04823	1-(5'-Phosphoribosyl)-5-amino-4-(N-succinocarboxamide)-imidazole;	4.3.2.2	adenylosuccinate lyase;	map00230	Purine metabolism	bbr	ssp	mxa	lil	hpa	lin	eco	son	ama	bba	bpa	bbr	gka	lpf	ngo	sme	cte	cli	tdn	aae	hth	nam
		x	C04751	1-(5-Phospho-D-ribosyl)-5-amino-4-imidazolecarboxylate;	C04823	1-(5'-Phosphoribosyl)-5-amino-4-(N-succinocarboxamide)-imidazole;	6.3.2.6	phosphoribosylaminoimidazolesuccinocarboxamide synthase;	map00230	Purine metabolism	bbr	ssp	mxa	lil		lin	eco	son	ama	bba	bpa	bbr	gka	lpf	ngo	sme	cte	cli	tdn	aae	hth	nam
		x	C04751	1-(5-Phospho-D-ribosyl)-5-amino-4-imidazolecarboxylate;	C15667	5-Carboxyamino-1-(5-phospho-D-ribosyl)imidazole	5.4.99.18	5-(carboxyamino)imidazole ribonucleotide mutase;	map00230	Purine metabolism	bbr	ssp	mxa	lil		lin	eco	son	ama	bba	bpa	bbr	gka	lpf	ngo	sme	cte	cli	tdn	aae	hth	nam
		x	C00130	IMP;	C04734	1-(5'-Phosphoribosyl)-5-formamido-4-imidazolecarboxamide;	2.1.2.3	phosphoribosylaminoimidazolecarboxamide formyltransferase;	map00230	Purine metabolism	bbr	ssp	mxa	lil		lin	eco	son	ama	bba	bpa	bbr	gka	lpf	ngo	sme	cte	cli	tdn	aae	hth	nam
		x	C00130	IMP;	C03794	N6-(1,2-Dicarboxyethyl)-AMP;	6.3.4.4	adenylosuccinate synthase;	map00230	Purine metabolism	bbr	ssp	mxa	lil	hpa	lin	eco	son	ama	bba	bpa	bbr	gka	lpf	ngo	sme	cte	cli	tdn	aae	hth	nam
		x	C00020	AMP;	C03794	N6-(1,2-Dicarboxyethyl)-AMP;	4.3.2.2	adenylosuccinate lyase;	map00230	Purine metabolism	bbr	ssp	mxa	lil	hpa	lin	eco	son	ama	bba	bpa	bbr	gka	lpf	ngo	sme	cte	cli	tdn	aae	hth	nam
		x	C04677	1-(5'-Phosphoribosyl)-5-amino-4-imidazolecarboxamide;	C04734	1-(5'-Phosphoribosyl)-5-formamido-4-imidazolecarboxamide;	2.1.2.3	phosphoribosylaminoimidazolecarboxamide formyltransferase;	map00230	Purine metabolism	bbr	ssp	mxa	lil		lin	eco	son	ama	bba	bpa	bbr	gka	lpf	ngo	sme	cte	cli	tdn	aae	hth	nam
		x	C00046	RNA;	C00075	UTP;	2.7.7.6	DNA-directed RNA polymerase;	map00240	Pyrimidine metabolism	bbr	ssp	mxa	lil	hpa	lin	eco	son	ama	bba	bpa	bbr	gka	lpf	ngo	sme	cte	cli	tdn	aae	hth	nam
		x	C00279	D-Erythrose 4-phosphate	C05345	beta-D-Fructose 6-phosphate	2.2.1.1	transketolase;	map00030	Pentose phosphate pathway	bbr	ssp	mxa	lil	hpa	lin	eco	son	ama	bba	bpa	bbr	gka	lpf	ngo	sme	cte	cli	tdn	aae	hth	nam
		x	C05223	Dodecanoyl-[acyl-carrier protein];	C05758	trans-Dodec-2-enoyl-[acp];	2.3.1.-	<Transferases; Acyltransferases; Transferring groups other than amino-acyl groups>	map00061	Fatty acid biosynthesis	bbr	ssp	mxa	lil	hpa	lin	eco	son		bba	bpa	bbr	gka	lpf	ngo	sme	cte	cli	tdn	aae	hth	nam
		x	C00074	Phosphoenolpyruvate;	C00631	2-Phospho-D-glycerate;	4.2.1.11	phosphopyruvate hydratase;	map00010	Glycolysis / Gluconeogenesis	bbr	ssp	mxa	lil	hpa	lin	eco	son	ama	bba	bpa	bbr	gka	lpf	ngo	sme	cte	cli	tdn	aae	hth	nam
		x	C00002	ATP;	C00008	ADP;	2.7.4.6	nucleoside-diphosphate kinase;	map00230	Purine metabolism	bbr	ssp	mxa	lil	hpa	lin	eco	son	ama	bba	bpa	bbr	gka	lpf	ngo	sme	cte	cli	tdn	aae	hth	nam
		x	C00002	ATP;	C00008	ADP;	2.7.1.40	pyruvate kinase;	map00230	Purine metabolism	bbr	ssp	mxa	lil		lin	eco	son		bba	bpa	bbr	gka	lpf	ngo	sme						nam
		x	C00311	Isocitrate;	C00417	cis-Aconitate;	4.2.1.3	aconitate hydratase;	map00020; map00630; map00720	Citrate cycle (TCA cycle); Glyoxylate and dicarboxylate metabolism; Reductive carboxylate cycle (CO2 fixation)	bbr	ssp	mxa	lil	hpa	lin	eco	son	ama	bba	bpa	bbr	gka	lpf	ngo	sme	cte	cli	tdn	aae	hth	nam
		x	C00117	D-Ribose 5-phosphate;	C05382	Sedoheptulose 7-phosphate;	2.2.1.1	transketolase;	map00030; map00710	Pentose phosphate pathway; Carbon fixation in photosynthetic organisms	bbr	ssp	mxa	lil	hpa	lin	eco	son	ama	bba	bpa	bbr	gka	lpf	ngo	sme	cte	cli	tdn	aae	hth	nam
		x	C00111	Glycerone phosphate;	C00118	D-Glyceraldehyde 3-phosphate;	5.3.1.1	triose-phosphate isomerase;	map00010; map00051; map00562; map00710	Glycolysis / Gluconeogenesis; Fructose and mannose metabolism; Inositol phosphate metabolism; Carbon fixation in photosynthetic organisms	bbr	ssp	mxa	lil	hpa	lin	eco	son	ama	bba	bpa	bbr	gka	lpf	ngo	sme	cte	cli	tdn	aae	hth	nam
		x	C00111	Glycerone phosphate;	C01094	D-Fructose 1-phosphate	4.1.2.13	fructose-bisphosphate aldolase;	map00051	Fructose and mannose metabolism	bbr	ssp	mxa	lil	hpa	lin	eco	son	ama	bba	bpa	bbr	gka	lpf	ngo	sme	cte	cli	tdn	aae	hth	nam
		x	C05761	Tetradecanoyl-[acp];	C05762	3-Oxohexadecanoyl-[acp];	2.3.1.-	<Transferases; Acyltransferases; Transferring groups other than amino-acyl groups>	map00061	Fatty acid biosynthesis	bbr	ssp	mxa	lil	hpa	lin	eco	son		bba	bpa	bbr	gka	lpf	ngo	sme	cte	cli	tdn	aae	hth	nam
		x	C00008	ADP;	C00020	AMP;	2.7.4.3	adenylate kinase;	map00230	Purine metabolism	bbr	ssp	mxa	lil	hpa	lin	eco	son	ama	bba	bpa	bbr	gka	lpf	ngo	sme	cte	cli	tdn	aae	hth	nam
		x	C00111	Glycerone phosphate;	C05378	beta-D-Fructose 1,6-bisphosphate	4.1.2.13	fructose-bisphosphate aldolase;	map00010; map00051	Glycolysis / Gluconeogenesis; Fructose and mannose metabolism	bbr	ssp	mxa	lil	hpa	lin	eco	son	ama	bba	bpa	bbr	gka	lpf	ngo	sme	cte	cli	tdn	aae	hth	nam
		x	C04619	(3R)-3-Hydroxydecanoyl-[acyl-carrier protein];	C05753	3-Oxodecanoyl-[acp];	2.3.1.-	<Transferases; Acyltransferases; Transferring groups other than amino-acyl groups>	map00061	Fatty acid biosynthesis	bbr	ssp	mxa	lil	hpa	lin	eco	son		bba	bpa	bbr	gka	lpf	ngo	sme	cte	cli	tdn	aae	hth	nam
		x	C00112	CDP;	C00705	dCDP;	1.17.4.1	ribonucleoside-diphosphate reductase;	map00240	Pyrimidine metabolism	bbr	ssp	mxa	lil	hpa	lin	eco	son	ama	bba	bpa	bbr	gka	lpf	ngo	sme	cte	cli	tdn	aae	hth	nam
		x	C00352	D-Glucosamine 6-phosphate;	C05345	beta-D-Fructose 6-phosphate	2.6.1.16	glutamine---fructose-6-phosphate transaminase (isomerizing);	map00520	Amino sugar and nucleotide sugar metabolism	bbr	ssp	mxa	lil	hpa	lin	eco	son	ama	bba	bpa	bbr	gka	lpf	ngo	sme	cte	cli	tdn	aae	hth	nam
		x	C04620	(3R)-3-Hydroxyoctanoyl-[acyl-carrier protein];	C05750	3-Oxooctanoyl-[acp];	1.1.1.100	3-oxoacyl-[acyl-carrier-protein] reductase;	map00061	Fatty acid biosynthesis	bbr	ssp	mxa	lil	hpa	lin	eco	son	ama	bba	bpa	bbr	gka	lpf	ngo	sme	cte	cli	tdn	aae	hth	nam
		x	C05223	Dodecanoyl-[acyl-carrier protein];	C05759	3-Oxotetradecanoyl-[acp];	2.3.1.-	<Transferases; Acyltransferases; Transferring groups other than amino-acyl groups>	map00061	Fatty acid biosynthesis	bbr	ssp	mxa	lil	hpa	lin	eco	son		bba	bpa	bbr	gka	lpf	ngo	sme	cte	cli	tdn	aae	hth	nam
		x	C04501	N-Acetyl-alpha-D-glucosamine 1-phosphate	C06156	alpha-D-Glucosamine 1-phosphate;	2.3.1.157	glucosamine-1-phosphate N-acetyltransferase	map00520	Amino sugar and nucleotide sugar metabolism	bbr	ssp	mxa		hpa	lin	eco	son	ama	bba	bpa	bbr	gka	lpf	ngo	sme			tdn	aae	hth	nam
		x	C00043	UDP-N-acetyl-D-glucosamine;	C04501	N-Acetyl-alpha-D-glucosamine 1-phosphate	2.7.7.23	UDP-N-acetylglucosamine diphosphorylase;	map00520	Amino sugar and nucleotide sugar metabolism	bbr	ssp	mxa	lil	hpa	lin	eco	son	ama	bba	bpa	bbr	gka	lpf	ngo	sme	cte	cli	tdn	aae	hth	nam
		x	C00043	UDP-N-acetyl-D-glucosamine;	C04631	UDP-N-acetyl-3-(1-carboxyvinyl)-D-glucosamine;	2.5.1.7	UDP-N-acetylglucosamine 1-carboxyvinyltransferase;	map00520; map00550	Amino sugar and nucleotide sugar metabolism; Peptidoglycan biosynthesis	bbr	ssp	mxa	lil	hpa	lin	eco	son	ama	bba	bpa	bbr	gka	lpf	ngo	sme	cte	cli	tdn	aae	hth	nam
		x	C01050	UDP-N-acetylmuramate;	C04631	UDP-N-acetyl-3-(1-carboxyvinyl)-D-glucosamine;	1.1.1.158	UDP-N-acetylmuramate dehydrogenase;	map00520; map00550	Amino sugar and nucleotide sugar metabolism; Peptidoglycan biosynthesis	bbr	ssp	mxa	lil	hpa	lin	eco	son	ama	bba	bpa	bbr	gka	lpf	ngo	sme	cte	cli	tdn	aae	hth	nam
		x	C01050	UDP-N-acetylmuramate;	C01212	UDP-N-acetylmuramoyl-L-alanine	6.3.2.8	UDP-N-acetylmuramate---L-alanine ligase;	map00471; map00550	D-Glutamine and D-glutamate metabolism; Peptidoglycan biosynthesis	bbr	ssp	mxa	lil	hpa	lin	eco	son	ama	bba	bpa	bbr	gka	lpf	ngo	sme	cte	cli	tdn	aae	hth	nam
		x	C00692	UDP-N-acetylmuramoyl-L-alanyl-D-glutamate	C01212	UDP-N-acetylmuramoyl-L-alanine	6.3.2.9	UDP-N-acetylmuramoyl-L-alanine---D-glutamate ligase;	map00471; map00550	D-Glutamine and D-glutamate metabolism; Peptidoglycan biosynthesis	bbr	ssp	mxa	lil	hpa	lin	eco	son	ama	bba	bpa	bbr	gka	lpf	ngo	sme	cte	cli	tdn	aae	hth	nam
		x	C00117	D-Ribose 5-phosphate;	C00199	D-Ribulose 5-phosphate	5.3.1.6	ribose-5-phosphate isomerase;	map00030; map00710	Pentose phosphate pathway; Carbon fixation in photosynthetic organisms	bbr	ssp	mxa	lil	hpa	lin	eco	son	ama	bba	bpa	bbr	gka	lpf	ngo	sme	cte	cli	tdn	aae	hth	nam
		x	C00295	Orotate;	C01103	Orotidine 5'-phosphate;	2.4.2.10	orotate phosphoribosyltransferase;	map00240	Pyrimidine metabolism	bbr	ssp	mxa	lil	hpa	lin	eco	son	ama	bba	bpa	bbr	gka	lpf	ngo	sme	cte	cli	tdn	aae	hth	nam
		x	C00295	Orotate;	C00337	(S)-Dihydroorotate;	1.3.3.1	dihydroorotate oxidase;	map00240	Pyrimidine metabolism	bbr	ssp	mxa	lil	hpa	lin	eco	son	ama	bba	bpa	bbr	gka	lpf	ngo	sme	cte	cli	tdn	aae	hth	nam
		x	C00337	(S)-Dihydroorotate;	C00438	N-Carbamoyl-L-aspartate	3.5.2.3	dihydroorotase;	map00240	Pyrimidine metabolism	bbr	ssp	mxa	lil	hpa	lin	eco	son	ama	bba	bpa	bbr	gka	lpf	ngo	sme	cte	cli	tdn	aae	hth	nam
		x	C00169	Carbamoyl phosphate	C00438	N-Carbamoyl-L-aspartate	2.1.3.2	aspartate carbamoyltransferase;	map00240; map00250	Pyrimidine metabolism; Alanine, aspartate and glutamate metabolism	bbr	ssp	mxa	lil	hpa	lin	eco	son	ama	bba	bpa	bbr	gka	lpf	ngo	sme	cte	cli	tdn	aae	hth	nam
		x	C00064	L-Glutamine;	C00169	Carbamoyl phosphate	6.3.5.5	carbamoyl-phosphate synthase (glutamine-hydrolysing);	map00240; map00250	Pyrimidine metabolism; Alanine, aspartate and glutamate metabolism	bbr	ssp	mxa	lil	hpa	lin	eco	son	ama	bba	bpa	bbr	gka	lpf	ngo	sme	cte	cli	tdn	aae	hth	nam
		x	C00025	L-Glutamate;	C00064	L-Glutamine;	6.3.1.2	glutamate---ammonia ligase;	map00250; map00330; map00910	Alanine, aspartate and glutamate metabolism; Arginine and proline metabolism; Nitrogen metabolism	bbr	ssp	mxa	lil	hpa	lin	eco	son	ama	bba	bpa	bbr	gka	lpf	ngo	sme	cte	cli	tdn	aae	hth	nam
		x	C05763	trans-Hexadec-2-enoyl-[acp];	C05764	Hexadecanoyl-[acp];	2.3.1.-	<Transferases; Acyltransferases; Transferring groups other than amino-acyl groups>	map00061	Fatty acid biosynthesis	bbr	ssp	mxa	lil	hpa	lin	eco	son		bba	bpa	bbr	gka	lpf	ngo	sme	cte	cli	tdn	aae	hth	nam
		x	C00249	Hexadecanoic acid;	C05764	Hexadecanoyl-[acp];	2.3.1.-	<Transferases; Acyltransferases; Transferring groups other than amino-acyl groups>	map00061; map01040	Fatty acid biosynthesis; Biosynthesis of unsaturated fatty acids	bbr	ssp	mxa	lil	hpa	lin	eco	son		bba	bpa	bbr	gka	lpf	ngo	sme	cte	cli	tdn	aae	hth	nam
		x	C03838	5'-Phosphoribosylglycinamide;	C04376	5'-Phosphoribosyl-N-formylglycinamide;	2.1.2.2	phosphoribosylglycinamide formyltransferase;	map00230	Purine metabolism	bbr	ssp	mxa	lil		lin	eco	son	ama	bba	bpa	bbr	gka	lpf	ngo	sme	cte	cli	tdn	aae	hth	nam
		x	C04376	5'-Phosphoribosyl-N-formylglycinamide;	C04640	2-(Formamido)-N1-(5'-phosphoribosyl)acetamidine;	6.3.5.3	phosphoribosylformylglycinamidine synthase;	map00230	Purine metabolism	bbr	ssp	mxa	lil		lin	eco	son	ama	bba	bpa	bbr	gka	lpf	ngo	sme	cte	cli	tdn	aae	hth	nam
		x	C03373	Aminoimidazole ribotide;	C04640	2-(Formamido)-N1-(5'-phosphoribosyl)acetamidine;	6.3.3.1	phosphoribosylformylglycinamidine cyclo-ligase;	map00230	Purine metabolism	bbr	ssp	mxa	lil		lin	eco	son	ama	bba	bpa	bbr	gka	lpf	ngo	sme	cte	cli	tdn	aae	hth	nam
		x	C05745	Butyryl-[acp];	C05746	3-Oxohexanoyl-[acp];	2.3.1.-	<Transferases; Acyltransferases; Transferring groups other than amino-acyl groups>	map00061	Fatty acid biosynthesis	bbr	ssp	mxa	lil	hpa	lin	eco	son		bba	bpa	bbr	gka	lpf	ngo	sme	cte	cli	tdn	aae	hth	nam
		x	C05761	Tetradecanoyl-[acp];	C05762	3-Oxohexadecanoyl-[acp];	2.3.1.179	beta-ketoacyl-acyl-carrier-protein synthase II;	map00061	Fatty acid biosynthesis	bbr	ssp	mxa	lil	hpa	lin	eco	son	ama	bba	bpa	bbr	gka	lpf	ngo	sme	cte	cli	tdn	aae	hth	nam
		x	C04618	(3R)-3-Hydroxybutanoyl-[acyl-carrier protein];	C05744	Acetoacetyl-[acp];	1.1.1.100	3-oxoacyl-[acyl-carrier-protein] reductase;	map00061	Fatty acid biosynthesis	bbr	ssp	mxa	lil	hpa	lin	eco	son	ama	bba	bpa	bbr	gka	lpf	ngo	sme	cte	cli	tdn	aae	hth	nam
Subsystem 5	0.0011258091753447786										bbr	ssp	mxa			lin	eco	son		bba	bpa	bbr	gka	lpf	ngo	sme
		i	C00101	Tetrahydrofolate;	C00415	Dihydrofolate;	1.5.1.3	dihydrofolate reductase;	map00670; map00790	One carbon pool by folate; Folate biosynthesis	bbr	ssp	mxa			lin	eco	son		bba	bpa	bbr	gka	lpf	ngo	sme
		x	C00101	Tetrahydrofolate;	C00143	5,10-Methylenetetrahydrofolate;	2.1.2.10	aminomethyltransferase;	map00260; map00670	Glycine, serine and threonine metabolism; One carbon pool by folate	bbr	ssp	mxa	lil		lin	eco	son		bba	bpa	bbr	gka	lpf	ngo	sme	cte	cli		aae	hth
		x	C00101	Tetrahydrofolate;	C00504	Folate;	1.5.1.3	dihydrofolate reductase;	map00670; map00790	One carbon pool by folate; Folate biosynthesis	bbr	ssp	mxa			lin	eco	son		bba	bpa	bbr	gka	lpf	ngo	sme
		x	C00101	Tetrahydrofolate;	C00143	5,10-Methylenetetrahydrofolate;	2.1.2.1	glycine hydroxymethyltransferase;	map00260; map00670	Glycine, serine and threonine metabolism; One carbon pool by folate	bbr	ssp	mxa	lil	hpa	lin	eco	son	ama	bba	bpa	bbr	gka	lpf	ngo	sme	cte	cli	tdn	aae	hth	nam
		x	C00101	Tetrahydrofolate;	C00234	10-Formyltetrahydrofolate;	2.1.2.3	phosphoribosylaminoimidazolecarboxamide formyltransferase;	map00670	One carbon pool by folate	bbr	ssp	mxa	lil		lin	eco	son	ama	bba	bpa	bbr	gka	lpf	ngo	sme	cte	cli	tdn	aae	hth	nam
		x	C00415	Dihydrofolate;	C00504	Folate;	1.5.1.3	dihydrofolate reductase;	map00670; map00790	One carbon pool by folate; Folate biosynthesis	bbr	ssp	mxa			lin	eco	son		bba	bpa	bbr	gka	lpf	ngo	sme
		x	C00101	Tetrahydrofolate;	C00234	10-Formyltetrahydrofolate;	2.1.2.2	phosphoribosylglycinamide formyltransferase;	map00670	One carbon pool by folate	bbr	ssp	mxa	lil		lin	eco	son	ama	bba	bpa	bbr	gka	lpf	ngo	sme	cte	cli	tdn	aae	hth	nam
		x	C00101	Tetrahydrofolate;	C00445	5,10-Methenyltetrahydrofolate	2.1.2.2	phosphoribosylglycinamide formyltransferase;	map00670	One carbon pool by folate	bbr	ssp	mxa	lil		lin	eco	son	ama	bba	bpa	bbr	gka	lpf	ngo	sme	cte	cli	tdn	aae	hth	nam
		x	C00234	10-Formyltetrahydrofolate;	C00445	5,10-Methenyltetrahydrofolate	3.5.4.9	methenyltetrahydrofolate cyclohydrolase;	map00630; map00670	Glyoxylate and dicarboxylate metabolism; One carbon pool by folate	bbr	ssp	mxa	lil	hpa	lin	eco	son	ama	bba	bpa	bbr	gka	lpf	ngo	sme	cte	cli	tdn	aae	hth	nam
		x	C00143	5,10-Methylenetetrahydrofolate;	C00445	5,10-Methenyltetrahydrofolate	1.5.1.5	methylenetetrahydrofolate dehydrogenase (NADP+);	map00630; map00670	Glyoxylate and dicarboxylate metabolism; One carbon pool by folate	bbr	ssp	mxa	lil	hpa	lin	eco	son	ama	bba	bpa	bbr	gka	lpf	ngo	sme	cte	cli	tdn	aae	hth	nam
Subsystem 6	0.0011258091753447786										bbr		mxa	lil		lin	eco	son	ama	bba	bpa	bbr		lpf	ngo	sme
		i	C00025	L-Glutamate;	C00669	gamma-L-Glutamyl-L-cysteine;	6.3.2.2	glutamate---cysteine ligase;	map00480	Glutathione metabolism	bbr		mxa	lil		lin	eco	son	ama	bba	bpa	bbr		lpf	ngo	sme
		x	C00025	L-Glutamate;	C00064	L-Glutamine;	6.3.1.2	glutamate---ammonia ligase;	map00250; map00330; map00910	Alanine, aspartate and glutamate metabolism; Arginine and proline metabolism; Nitrogen metabolism	bbr	ssp	mxa	lil	hpa	lin	eco	son	ama	bba	bpa	bbr	gka	lpf	ngo	sme	cte	cli	tdn	aae	hth	nam
		x	C00064	L-Glutamine;	C00169	Carbamoyl phosphate	6.3.5.5	carbamoyl-phosphate synthase (glutamine-hydrolysing);	map00240; map00250	Pyrimidine metabolism; Alanine, aspartate and glutamate metabolism	bbr	ssp	mxa	lil	hpa	lin	eco	son	ama	bba	bpa	bbr	gka	lpf	ngo	sme	cte	cli	tdn	aae	hth	nam
		x	C00169	Carbamoyl phosphate	C00438	N-Carbamoyl-L-aspartate	2.1.3.2	aspartate carbamoyltransferase;	map00240; map00250	Pyrimidine metabolism; Alanine, aspartate and glutamate metabolism	bbr	ssp	mxa	lil	hpa	lin	eco	son	ama	bba	bpa	bbr	gka	lpf	ngo	sme	cte	cli	tdn	aae	hth	nam
		x	C00337	(S)-Dihydroorotate;	C00438	N-Carbamoyl-L-aspartate	3.5.2.3	dihydroorotase;	map00240	Pyrimidine metabolism	bbr	ssp	mxa	lil	hpa	lin	eco	son	ama	bba	bpa	bbr	gka	lpf	ngo	sme	cte	cli	tdn	aae	hth	nam
		x	C00097	L-Cysteine;	C00669	gamma-L-Glutamyl-L-cysteine;	6.3.2.2	glutamate---cysteine ligase;	map00480	Glutathione metabolism	bbr		mxa	lil		lin	eco	son	ama	bba	bpa	bbr		lpf	ngo	sme
		x	C00295	Orotate;	C00337	(S)-Dihydroorotate;	1.3.3.1	dihydroorotate oxidase;	map00240	Pyrimidine metabolism	bbr	ssp	mxa	lil	hpa	lin	eco	son	ama	bba	bpa	bbr	gka	lpf	ngo	sme	cte	cli	tdn	aae	hth	nam
		x	C00295	Orotate;	C01103	Orotidine 5'-phosphate;	2.4.2.10	orotate phosphoribosyltransferase;	map00240	Pyrimidine metabolism	bbr	ssp	mxa	lil	hpa	lin	eco	son	ama	bba	bpa	bbr	gka	lpf	ngo	sme	cte	cli	tdn	aae	hth	nam
		x	C00105	UMP;	C01103	Orotidine 5'-phosphate;	4.1.1.23	orotidine-5'-phosphate decarboxylase;	map00240	Pyrimidine metabolism	bbr	ssp	mxa	lil	hpa	lin	eco	son	ama	bba	bpa	bbr	gka	lpf	ngo	sme	cte	cli	tdn	aae	hth	nam
		x	C00015	UDP;	C00105	UMP;	2.7.4.14	cytidylate kinase;	map00240	Pyrimidine metabolism	bbr	ssp	mxa	lil		lin	eco	son	ama	bba	bpa	bbr	gka	lpf	ngo	sme	cte	cli		aae	hth
		x	C00015	UDP;	C00075	UTP;	2.7.4.6	nucleoside-diphosphate kinase;	map00240	Pyrimidine metabolism	bbr	ssp	mxa	lil	hpa	lin	eco	son	ama	bba	bpa	bbr	gka	lpf	ngo	sme	cte	cli	tdn	aae	hth	nam
		x	C00063	CTP;	C00075	UTP;	6.3.4.2	CTP synthase;	map00240	Pyrimidine metabolism	bbr	ssp	mxa	lil	hpa	lin	eco	son	ama	bba	bpa	bbr	gka	lpf	ngo	sme	cte	cli	tdn	aae	hth	nam
		x	C00063	CTP;	C00112	CDP;	2.7.4.6	nucleoside-diphosphate kinase;	map00240	Pyrimidine metabolism	bbr	ssp	mxa	lil	hpa	lin	eco	son	ama	bba	bpa	bbr	gka	lpf	ngo	sme	cte	cli	tdn	aae	hth	nam
		x	C00055	CMP;	C00112	CDP;	2.7.4.14	cytidylate kinase;	map00240	Pyrimidine metabolism	bbr	ssp	mxa	lil		lin	eco	son	ama	bba	bpa	bbr	gka	lpf	ngo	sme	cte	cli		aae	hth
		x	C00046	RNA;	C00063	CTP;	2.7.7.6	DNA-directed RNA polymerase;	map00240	Pyrimidine metabolism	bbr	ssp	mxa	lil	hpa	lin	eco	son	ama	bba	bpa	bbr	gka	lpf	ngo	sme	cte	cli	tdn	aae	hth	nam
		x	C00002	ATP;	C00046	RNA;	2.7.7.6	DNA-directed RNA polymerase;	map00230	Purine metabolism	bbr	ssp	mxa	lil	hpa	lin	eco	son	ama	bba	bpa	bbr	gka	lpf	ngo	sme	cte	cli	tdn	aae	hth	nam
		x	C00044	GTP;	C00046	RNA;	2.7.7.6	DNA-directed RNA polymerase;	map00230	Purine metabolism	bbr	ssp	mxa	lil	hpa	lin	eco	son	ama	bba	bpa	bbr	gka	lpf	ngo	sme	cte	cli	tdn	aae	hth	nam
		x	C00035	GDP;	C00044	GTP;	2.7.4.6	nucleoside-diphosphate kinase;	map00230	Purine metabolism	bbr	ssp	mxa	lil	hpa	lin	eco	son	ama	bba	bpa	bbr	gka	lpf	ngo	sme	cte	cli	tdn	aae	hth	nam
		x	C00035	GDP;	C00361	dGDP;	1.17.4.1	ribonucleoside-diphosphate reductase;	map00230	Purine metabolism	bbr	ssp	mxa	lil	hpa	lin	eco	son	ama	bba	bpa	bbr	gka	lpf	ngo	sme	cte	cli	tdn	aae	hth	nam
		x	C00035	GDP;	C00144	GMP;	2.7.4.8	guanylate kinase;	map00230	Purine metabolism	bbr	ssp	mxa	lil	hpa	lin	eco	son	ama	bba	bpa	bbr	gka	lpf	ngo	sme	cte	cli	tdn	aae	hth	nam
		x	C00286	dGTP;	C00361	dGDP;	2.7.4.6	nucleoside-diphosphate kinase;	map00230	Purine metabolism	bbr	ssp	mxa	lil	hpa	lin	eco	son	ama	bba	bpa	bbr	gka	lpf	ngo	sme	cte	cli	tdn	aae	hth	nam
		x	C00119	5-Phospho-alpha-D-ribose 1-diphosphate;	C01103	Orotidine 5'-phosphate;	2.4.2.10	orotate phosphoribosyltransferase;	map00240	Pyrimidine metabolism	bbr	ssp	mxa	lil	hpa	lin	eco	son	ama	bba	bpa	bbr	gka	lpf	ngo	sme	cte	cli	tdn	aae	hth	nam
		x	C00119	5-Phospho-alpha-D-ribose 1-diphosphate;	C03090	5-Phosphoribosylamine;	2.4.2.14	amidophosphoribosyltransferase;	map00230	Purine metabolism	bbr	ssp	mxa	lil		lin	eco	son	ama	bba	bpa	bbr	gka	lpf	ngo	sme	cte	cli	tdn	aae	hth	nam
		x	C03090	5-Phosphoribosylamine;	C03838	5'-Phosphoribosylglycinamide;	6.3.4.13	phosphoribosylamine---glycine ligase;	map00230	Purine metabolism	bbr	ssp	mxa	lil	hpa	lin	eco	son	ama	bba	bpa	bbr	gka	lpf	ngo	sme	cte	cli	tdn	aae	hth	nam
		x	C00361	dGDP;	C00362	dGMP;	2.7.4.8	guanylate kinase;	map00230	Purine metabolism	bbr	ssp	mxa	lil	hpa	lin	eco	son	ama	bba	bpa	bbr	gka	lpf	ngo	sme	cte	cli	tdn	aae	hth	nam
		x	C00144	GMP;	C00655	Xanthosine 5'-phosphate;	6.3.5.2	GMP synthase (glutamine-hydrolysing);	map00230	Purine metabolism	bbr	ssp	mxa	lil	hpa	lin	eco	son	ama	bba	bpa	bbr	gka	lpf	ngo	sme	cte	cli	tdn	aae	hth	nam
		x	C00130	IMP;	C00655	Xanthosine 5'-phosphate;	1.1.1.205	IMP dehydrogenase;	map00230	Purine metabolism	bbr	ssp	mxa	lil	hpa	lin	eco	son	ama	bba	bpa	bbr	gka	lpf	ngo	sme	cte	cli	tdn	aae	hth	nam
		x	C00130	IMP;	C04734	1-(5'-Phosphoribosyl)-5-formamido-4-imidazolecarboxamide;	2.1.2.3	phosphoribosylaminoimidazolecarboxamide formyltransferase;	map00230	Purine metabolism	bbr	ssp	mxa	lil		lin	eco	son	ama	bba	bpa	bbr	gka	lpf	ngo	sme	cte	cli	tdn	aae	hth	nam
		x	C04677	1-(5'-Phosphoribosyl)-5-amino-4-imidazolecarboxamide;	C04734	1-(5'-Phosphoribosyl)-5-formamido-4-imidazolecarboxamide;	6.3.4.-	<Ligases; Forming carbon-nitrogen bonds; Other carbon--nitrogen ligases>	map00230	Purine metabolism	bbr	ssp	mxa	lil	hpa	lin	eco	son	ama	bba	bpa	bbr	gka	lpf	ngo	sme	cte	cli	tdn	aae	hth	nam
		x	C04677	1-(5'-Phosphoribosyl)-5-amino-4-imidazolecarboxamide;	C04823	1-(5'-Phosphoribosyl)-5-amino-4-(N-succinocarboxamide)-imidazole;	4.3.2.2	adenylosuccinate lyase;	map00230	Purine metabolism	bbr	ssp	mxa	lil	hpa	lin	eco	son	ama	bba	bpa	bbr	gka	lpf	ngo	sme	cte	cli	tdn	aae	hth	nam
		x	C00130	IMP;	C03794	N6-(1,2-Dicarboxyethyl)-AMP;	6.3.4.4	adenylosuccinate synthase;	map00230	Purine metabolism	bbr	ssp	mxa	lil	hpa	lin	eco	son	ama	bba	bpa	bbr	gka	lpf	ngo	sme	cte	cli	tdn	aae	hth	nam
		x	C00020	AMP;	C03794	N6-(1,2-Dicarboxyethyl)-AMP;	4.3.2.2	adenylosuccinate lyase;	map00230	Purine metabolism	bbr	ssp	mxa	lil	hpa	lin	eco	son	ama	bba	bpa	bbr	gka	lpf	ngo	sme	cte	cli	tdn	aae	hth	nam
		x	C04677	1-(5'-Phosphoribosyl)-5-amino-4-imidazolecarboxamide;	C04734	1-(5'-Phosphoribosyl)-5-formamido-4-imidazolecarboxamide;	2.1.2.3	phosphoribosylaminoimidazolecarboxamide formyltransferase;	map00230	Purine metabolism	bbr	ssp	mxa	lil		lin	eco	son	ama	bba	bpa	bbr	gka	lpf	ngo	sme	cte	cli	tdn	aae	hth	nam
		x	C00130	IMP;	C04734	1-(5'-Phosphoribosyl)-5-formamido-4-imidazolecarboxamide;	3.5.4.10	IMP cyclohydrolase;	map00230	Purine metabolism	bbr	ssp	mxa	lil		lin	eco	son	ama	bba	bpa	bbr	gka	lpf	ngo	sme	cte	cli	tdn	aae	hth	nam
		x	C00046	RNA;	C00075	UTP;	2.7.7.6	DNA-directed RNA polymerase;	map00240	Pyrimidine metabolism	bbr	ssp	mxa	lil	hpa	lin	eco	son	ama	bba	bpa	bbr	gka	lpf	ngo	sme	cte	cli	tdn	aae	hth	nam
		x	C00002	ATP;	C00008	ADP;	2.7.4.6	nucleoside-diphosphate kinase;	map00230	Purine metabolism	bbr	ssp	mxa	lil	hpa	lin	eco	son	ama	bba	bpa	bbr	gka	lpf	ngo	sme	cte	cli	tdn	aae	hth	nam
		x	C00008	ADP;	C00206	dADP;	1.17.4.1	ribonucleoside-diphosphate reductase;	map00230	Purine metabolism	bbr	ssp	mxa	lil	hpa	lin	eco	son	ama	bba	bpa	bbr	gka	lpf	ngo	sme	cte	cli	tdn	aae	hth	nam
		x	C00206	dADP;	C00360	dAMP;	2.7.4.3	adenylate kinase;	map00230	Purine metabolism	bbr	ssp	mxa	lil	hpa	lin	eco	son	ama	bba	bpa	bbr	gka	lpf	ngo	sme	cte	cli	tdn	aae	hth	nam
		x	C00131	dATP;	C00206	dADP;	2.7.4.6	nucleoside-diphosphate kinase;	map00230	Purine metabolism	bbr	ssp	mxa	lil	hpa	lin	eco	son	ama	bba	bpa	bbr	gka	lpf	ngo	sme	cte	cli	tdn	aae	hth	nam
		x	C00039	DNA;	C00131	dATP;	2.7.7.7	DNA-directed DNA polymerase;	map00230	Purine metabolism	bbr	ssp	mxa	lil	hpa	lin	eco	son	ama	bba	bpa	bbr	gka	lpf	ngo	sme	cte	cli	tdn	aae	hth	nam
		x	C00039	DNA;	C00458	dCTP;	2.7.7.7	DNA-directed DNA polymerase;	map00240	Pyrimidine metabolism	bbr	ssp	mxa	lil	hpa	lin	eco	son	ama	bba	bpa	bbr	gka	lpf	ngo	sme	cte	cli	tdn	aae	hth	nam
		x	C00008	ADP;	C00020	AMP;	2.7.4.3	adenylate kinase;	map00230	Purine metabolism	bbr	ssp	mxa	lil	hpa	lin	eco	son	ama	bba	bpa	bbr	gka	lpf	ngo	sme	cte	cli	tdn	aae	hth	nam
		x	C00112	CDP;	C00705	dCDP;	1.17.4.1	ribonucleoside-diphosphate reductase;	map00240	Pyrimidine metabolism	bbr	ssp	mxa	lil	hpa	lin	eco	son	ama	bba	bpa	bbr	gka	lpf	ngo	sme	cte	cli	tdn	aae	hth	nam
		x	C00117	D-Ribose 5-phosphate;	C00119	5-Phospho-alpha-D-ribose 1-diphosphate;	2.7.6.1	ribose-phosphate diphosphokinase;	map00030; map00230	Pentose phosphate pathway; Purine metabolism	bbr	ssp	mxa	lil	hpa	lin	eco	son	ama	bba	bpa	bbr	gka	lpf	ngo	sme	cte	cli	tdn	aae	hth	nam
		x	C00117	D-Ribose 5-phosphate;	C00118	D-Glyceraldehyde 3-phosphate;	2.2.1.1	transketolase;	map00030; map00710	Pentose phosphate pathway; Carbon fixation in photosynthetic organisms	bbr	ssp	mxa	lil	hpa	lin	eco	son	ama	bba	bpa	bbr	gka	lpf	ngo	sme	cte	cli	tdn	aae	hth	nam
		x	C00118	D-Glyceraldehyde 3-phosphate;	C00231	D-Xylulose 5-phosphate	2.2.1.1	transketolase;	map00030; map00710	Pentose phosphate pathway; Carbon fixation in photosynthetic organisms	bbr	ssp	mxa	lil	hpa	lin	eco	son	ama	bba	bpa	bbr	gka	lpf	ngo	sme	cte	cli	tdn	aae	hth	nam
		x	C00199	D-Ribulose 5-phosphate	C00231	D-Xylulose 5-phosphate	5.1.3.1	ribulose-phosphate 3-epimerase;	map00030; map00040; map00710	Pentose phosphate pathway; Pentose and glucuronate interconversions; Carbon fixation in photosynthetic organisms	bbr	ssp	mxa	lil	hpa	lin	eco	son	ama	bba	bpa	bbr	gka	lpf	ngo	sme	cte	cli	tdn	aae	hth	nam
		x	C00231	D-Xylulose 5-phosphate	C05345	beta-D-Fructose 6-phosphate	2.2.1.1	transketolase;	map00030	Pentose phosphate pathway	bbr	ssp	mxa	lil	hpa	lin	eco	son	ama	bba	bpa	bbr	gka	lpf	ngo	sme	cte	cli	tdn	aae	hth	nam
		x	C00118	D-Glyceraldehyde 3-phosphate;	C00236	3-Phospho-D-glyceroyl phosphate;	1.2.1.12	glyceraldehyde-3-phosphate dehydrogenase (phosphorylating);	map00010	Glycolysis / Gluconeogenesis	bbr	ssp	mxa	lil	hpa	lin	eco	son	ama	bba	bpa	bbr	gka	lpf	ngo	sme	cte	cli	tdn	aae	hth	nam
		x	C00197	3-Phospho-D-glycerate;	C00236	3-Phospho-D-glyceroyl phosphate;	2.7.2.3	phosphoglycerate kinase;	map00010; map00710	Glycolysis / Gluconeogenesis; Carbon fixation in photosynthetic organisms	bbr	ssp	mxa	lil	hpa	lin	eco	son	ama	bba	bpa	bbr	gka	lpf	ngo	sme	cte	cli	tdn	aae	hth	nam
		x	C00197	3-Phospho-D-glycerate;	C00631	2-Phospho-D-glycerate;	5.4.2.1	phosphoglycerate mutase;	map00010	Glycolysis / Gluconeogenesis	bbr	ssp	mxa	lil	hpa	lin	eco	son	ama	bba	bpa	bbr	gka	lpf	ngo	sme	cte	cli	tdn	aae	hth	nam
		x	C00118	D-Glyceraldehyde 3-phosphate;	C05378	beta-D-Fructose 1,6-bisphosphate	4.1.2.13	fructose-bisphosphate aldolase;	map00010; map00030; map00051	Glycolysis / Gluconeogenesis; Pentose phosphate pathway; Fructose and mannose metabolism	bbr	ssp	mxa	lil	hpa	lin	eco	son	ama	bba	bpa	bbr	gka	lpf	ngo	sme	cte	cli	tdn	aae	hth	nam
		x	C00231	D-Xylulose 5-phosphate	C05382	Sedoheptulose 7-phosphate;	2.2.1.1	transketolase;	map00030; map00710	Pentose phosphate pathway; Carbon fixation in photosynthetic organisms	bbr	ssp	mxa	lil	hpa	lin	eco	son	ama	bba	bpa	bbr	gka	lpf	ngo	sme	cte	cli	tdn	aae	hth	nam
		x	C00279	D-Erythrose 4-phosphate	C05345	beta-D-Fructose 6-phosphate	2.2.1.1	transketolase;	map00030	Pentose phosphate pathway	bbr	ssp	mxa	lil	hpa	lin	eco	son	ama	bba	bpa	bbr	gka	lpf	ngo	sme	cte	cli	tdn	aae	hth	nam
		x	C00074	Phosphoenolpyruvate;	C00631	2-Phospho-D-glycerate;	4.2.1.11	phosphopyruvate hydratase;	map00010	Glycolysis / Gluconeogenesis	bbr	ssp	mxa	lil	hpa	lin	eco	son	ama	bba	bpa	bbr	gka	lpf	ngo	sme	cte	cli	tdn	aae	hth	nam
		x	C00118	D-Glyceraldehyde 3-phosphate;	C00279	D-Erythrose 4-phosphate	2.2.1.1	transketolase;	map00030; map00710	Pentose phosphate pathway; Carbon fixation in photosynthetic organisms	bbr	ssp	mxa	lil	hpa	lin	eco	son	ama	bba	bpa	bbr	gka	lpf	ngo	sme	cte	cli	tdn	aae	hth	nam
		x	C00111	Glycerone phosphate;	C00118	D-Glyceraldehyde 3-phosphate;	5.3.1.1	triose-phosphate isomerase;	map00010; map00051; map00562; map00710	Glycolysis / Gluconeogenesis; Fructose and mannose metabolism; Inositol phosphate metabolism; Carbon fixation in photosynthetic organisms	bbr	ssp	mxa	lil	hpa	lin	eco	son	ama	bba	bpa	bbr	gka	lpf	ngo	sme	cte	cli	tdn	aae	hth	nam
		x	C00111	Glycerone phosphate;	C01094	D-Fructose 1-phosphate	4.1.2.13	fructose-bisphosphate aldolase;	map00051	Fructose and mannose metabolism	bbr	ssp	mxa	lil	hpa	lin	eco	son	ama	bba	bpa	bbr	gka	lpf	ngo	sme	cte	cli	tdn	aae	hth	nam
		x	C00117	D-Ribose 5-phosphate;	C05382	Sedoheptulose 7-phosphate;	2.2.1.1	transketolase;	map00030; map00710	Pentose phosphate pathway; Carbon fixation in photosynthetic organisms	bbr	ssp	mxa	lil	hpa	lin	eco	son	ama	bba	bpa	bbr	gka	lpf	ngo	sme	cte	cli	tdn	aae	hth	nam
		x	C00111	Glycerone phosphate;	C05378	beta-D-Fructose 1,6-bisphosphate	4.1.2.13	fructose-bisphosphate aldolase;	map00010; map00051	Glycolysis / Gluconeogenesis; Fructose and mannose metabolism	bbr	ssp	mxa	lil	hpa	lin	eco	son	ama	bba	bpa	bbr	gka	lpf	ngo	sme	cte	cli	tdn	aae	hth	nam
		x	C00352	D-Glucosamine 6-phosphate;	C05345	beta-D-Fructose 6-phosphate	2.6.1.16	glutamine---fructose-6-phosphate transaminase (isomerizing);	map00520	Amino sugar and nucleotide sugar metabolism	bbr	ssp	mxa	lil	hpa	lin	eco	son	ama	bba	bpa	bbr	gka	lpf	ngo	sme	cte	cli	tdn	aae	hth	nam
		x	C00039	DNA;	C00286	dGTP;	2.7.7.7	DNA-directed DNA polymerase;	map00230	Purine metabolism	bbr	ssp	mxa	lil	hpa	lin	eco	son	ama	bba	bpa	bbr	gka	lpf	ngo	sme	cte	cli	tdn	aae	hth	nam
		x	C00117	D-Ribose 5-phosphate;	C00199	D-Ribulose 5-phosphate	5.3.1.6	ribose-5-phosphate isomerase;	map00030; map00710	Pentose phosphate pathway; Carbon fixation in photosynthetic organisms	bbr	ssp	mxa	lil	hpa	lin	eco	son	ama	bba	bpa	bbr	gka	lpf	ngo	sme	cte	cli	tdn	aae	hth	nam
		x	C00239	dCMP;	C00705	dCDP;	2.7.4.14	cytidylate kinase;	map00240	Pyrimidine metabolism	bbr	ssp	mxa	lil		lin	eco	son	ama	bba	bpa	bbr	gka	lpf	ngo	sme	cte	cli		aae	hth
		x	C03838	5'-Phosphoribosylglycinamide;	C04376	5'-Phosphoribosyl-N-formylglycinamide;	2.1.2.2	phosphoribosylglycinamide formyltransferase;	map00230	Purine metabolism	bbr	ssp	mxa	lil		lin	eco	son	ama	bba	bpa	bbr	gka	lpf	ngo	sme	cte	cli	tdn	aae	hth	nam
		x	C04376	5'-Phosphoribosyl-N-formylglycinamide;	C04640	2-(Formamido)-N1-(5'-phosphoribosyl)acetamidine;	6.3.5.3	phosphoribosylformylglycinamidine synthase;	map00230	Purine metabolism	bbr	ssp	mxa	lil		lin	eco	son	ama	bba	bpa	bbr	gka	lpf	ngo	sme	cte	cli	tdn	aae	hth	nam
		x	C03373	Aminoimidazole ribotide;	C04640	2-(Formamido)-N1-(5'-phosphoribosyl)acetamidine;	6.3.3.1	phosphoribosylformylglycinamidine cyclo-ligase;	map00230	Purine metabolism	bbr	ssp	mxa	lil		lin	eco	son	ama	bba	bpa	bbr	gka	lpf	ngo	sme	cte	cli	tdn	aae	hth	nam
		x	C00458	dCTP;	C00705	dCDP;	2.7.4.6	nucleoside-diphosphate kinase;	map00240	Pyrimidine metabolism	bbr	ssp	mxa	lil	hpa	lin	eco	son	ama	bba	bpa	bbr	gka	lpf	ngo	sme	cte	cli	tdn	aae	hth	nam
		x	C00039	DNA;	C00459	dTTP;	2.7.7.7	DNA-directed DNA polymerase;	map00240	Pyrimidine metabolism	bbr	ssp	mxa	lil	hpa	lin	eco	son	ama	bba	bpa	bbr	gka	lpf	ngo	sme	cte	cli	tdn	aae	hth	nam
		x	C00363	dTDP;	C00459	dTTP;	2.7.4.6	nucleoside-diphosphate kinase;	map00240	Pyrimidine metabolism	bbr	ssp	mxa	lil	hpa	lin	eco	son	ama	bba	bpa	bbr	gka	lpf	ngo	sme	cte	cli	tdn	aae	hth	nam
		x	C00363	dTDP;	C00364	dTMP;	2.7.4.9	dTMP kinase;	map00240	Pyrimidine metabolism	bbr	ssp	mxa	lil	hpa	lin	eco	son	ama	bba	bpa	bbr	gka	lpf	ngo	sme	cte	cli	tdn	aae	hth	nam
		x	C04751	1-(5-Phospho-D-ribosyl)-5-amino-4-imidazolecarboxylate;	C04823	1-(5'-Phosphoribosyl)-5-amino-4-(N-succinocarboxamide)-imidazole;	6.3.2.6	phosphoribosylaminoimidazolesuccinocarboxamide synthase;	map00230	Purine metabolism	bbr	ssp	mxa	lil		lin	eco	son	ama	bba	bpa	bbr	gka	lpf	ngo	sme	cte	cli	tdn	aae	hth	nam
		x	C04751	1-(5-Phospho-D-ribosyl)-5-amino-4-imidazolecarboxylate;	C15667	5-Carboxyamino-1-(5-phospho-D-ribosyl)imidazole	5.4.99.18	5-(carboxyamino)imidazole ribonucleotide mutase;	map00230	Purine metabolism	bbr	ssp	mxa	lil		lin	eco	son	ama	bba	bpa	bbr	gka	lpf	ngo	sme	cte	cli	tdn	aae	hth	nam
Subsystem 7	0.0011258091753447786										bbr	ssp	mxa	lil	hpa		eco	son		bba	bpa	bbr	gka	lpf		sme
		i	C00051	Glutathione;	C01419	Cys-Gly;	2.3.2.2	gamma-glutamyltransferase;	map00480	Glutathione metabolism	bbr	ssp	mxa	lil	hpa		eco	son		bba	bpa	bbr	gka	lpf		sme
		x	C00037	Glycine;	C01419	Cys-Gly;	3.4.11.1	leucyl aminopeptidase;	map00480	Glutathione metabolism	bbr	ssp	mxa	lil	hpa		eco	son	ama	bba	bpa	bbr	gka	lpf	ngo	sme	cte	cli	tdn	aae	hth	nam
		x	C00037	Glycine;	C00065	L-Serine;	2.1.2.1	glycine hydroxymethyltransferase;	map00260; map00460; map00680	Glycine, serine and threonine metabolism; Cyanoamino acid metabolism; Methane metabolism	bbr	ssp	mxa	lil	hpa	lin	eco	son	ama	bba	bpa	bbr	gka	lpf	ngo	sme	cte	cli	tdn	aae	hth	nam
		x	C00065	L-Serine;	C00143	5,10-Methylenetetrahydrofolate;	2.1.2.1	glycine hydroxymethyltransferase;	map00260; map00680	Glycine, serine and threonine metabolism; Methane metabolism	bbr	ssp	mxa	lil	hpa	lin	eco	son	ama	bba	bpa	bbr	gka	lpf	ngo	sme	cte	cli	tdn	aae	hth	nam
		x	C00051	Glutathione;	C05730	Glutathionylspermidine;	3.5.1.-	<Hydrolases; Acting on carbon-nitrogen bonds, other than peptide bonds; In linear amides>	map00480	Glutathione metabolism	bbr	ssp	mxa	lil	hpa	lin	eco	son		bba	bpa	bbr	gka	lpf	ngo	sme	cte	cli	tdn	aae	hth	nam
		x	C00315	Spermidine;	C05730	Glutathionylspermidine;	3.5.1.-	<Hydrolases; Acting on carbon-nitrogen bonds, other than peptide bonds; In linear amides>	map00480	Glutathione metabolism	bbr	ssp	mxa	lil	hpa	lin	eco	son		bba	bpa	bbr	gka	lpf	ngo	sme	cte	cli	tdn	aae	hth	nam
		x	C02090	Trypanothione;	C05730	Glutathionylspermidine;	3.5.1.-	<Hydrolases; Acting on carbon-nitrogen bonds, other than peptide bonds; In linear amides>	map00480	Glutathione metabolism	bbr	ssp	mxa	lil	hpa	lin	eco	son		bba	bpa	bbr	gka	lpf	ngo	sme	cte	cli	tdn	aae	hth	nam
		x	C02090	Trypanothione;	C03170	Trypanothione disulfide;	1.11.1.15	peroxiredoxin;	map00480	Glutathione metabolism	bbr	ssp	mxa	lil	hpa	lin	eco	son	ama	bba	bpa	bbr	gka	lpf	ngo	sme	cte	cli	tdn	aae	hth	nam
		x	C02090	Trypanothione;	C03170	Trypanothione disulfide;	1.17.4.1	ribonucleoside-diphosphate reductase;	map00480	Glutathione metabolism	bbr	ssp	mxa	lil	hpa	lin	eco	son	ama	bba	bpa	bbr	gka	lpf	ngo	sme	cte	cli	tdn	aae	hth	nam
		x	C00097	L-Cysteine;	C01419	Cys-Gly;	3.4.11.1	leucyl aminopeptidase;	map00480	Glutathione metabolism	bbr	ssp	mxa	lil	hpa		eco	son	ama	bba	bpa	bbr	gka	lpf	ngo	sme	cte	cli	tdn	aae	hth	nam
Subsystem 8	0.0011258091753447786										bbr	ssp	mxa		hpa	lin	eco	son			bpa	bbr	gka	lpf	ngo	sme
		i	C00022	Pyruvate;	C00065	L-Serine;	4.3.1.17	L-serine ammonia-lyase;	map00260; map00270	Glycine, serine and threonine metabolism; Cysteine and methionine metabolism	bbr	ssp	mxa		hpa	lin	eco	son			bpa	bbr	gka	lpf	ngo	sme
		x	C00022	Pyruvate;	C00204	2-Dehydro-3-deoxy-D-gluconate;	4.2.1.-	<Lyases; Carbon-oxygen lyases; Hydro-lyases>	map00030; map00040	Pentose phosphate pathway; Pentose and glucuronate interconversions	bbr	ssp	mxa		hpa	lin	eco	son	ama		bpa	bbr	gka	lpf	ngo	sme	cte	cli	tdn	aae	hth	nam
		x	C00065	L-Serine;	C00143	5,10-Methylenetetrahydrofolate;	2.1.2.1	glycine hydroxymethyltransferase;	map00260; map00680	Glycine, serine and threonine metabolism; Methane metabolism	bbr	ssp	mxa	lil	hpa	lin	eco	son	ama	bba	bpa	bbr	gka	lpf	ngo	sme	cte	cli	tdn	aae	hth	nam
		x	C00037	Glycine;	C00065	L-Serine;	2.1.2.1	glycine hydroxymethyltransferase;	map00260; map00460; map00680	Glycine, serine and threonine metabolism; Cyanoamino acid metabolism; Methane metabolism	bbr	ssp	mxa	lil	hpa	lin	eco	son	ama	bba	bpa	bbr	gka	lpf	ngo	sme	cte	cli	tdn	aae	hth	nam
		x	C00065	L-Serine;	C00078	L-Tryptophan;	4.2.1.20	tryptophan synthase;	map00260	Glycine, serine and threonine metabolism	bbr	ssp	mxa	lil	hpa	lin	eco	son			bpa	bbr	gka	lpf	ngo	sme	cte	cli	tdn	aae	hth	nam
		x	C00078	L-Tryptophan;	C03506	Indoleglycerol phosphate;	4.2.1.20	tryptophan synthase;	map00400	Phenylalanine, tyrosine and tryptophan biosynthesis	bbr	ssp	mxa	lil	hpa	lin	eco	son			bpa	bbr	gka	lpf	ngo	sme	cte	cli	tdn	aae	hth	nam
		x	C00463	Indole;	C03506	Indoleglycerol phosphate;	4.2.1.20	tryptophan synthase;	map00400	Phenylalanine, tyrosine and tryptophan biosynthesis	bbr	ssp	mxa	lil	hpa	lin	eco	son			bpa	bbr	gka	lpf	ngo	sme	cte	cli	tdn	aae	hth	nam
		x	C00078	L-Tryptophan;	C00463	Indole;	4.2.1.20	tryptophan synthase;	map00400	Phenylalanine, tyrosine and tryptophan biosynthesis	bbr	ssp	mxa	lil	hpa	lin	eco	son			bpa	bbr	gka	lpf	ngo	sme	cte	cli	tdn	aae	hth	nam
		x	C00204	2-Dehydro-3-deoxy-D-gluconate;	C00577	D-Glyceraldehyde	4.2.1.-	<Lyases; Carbon-oxygen lyases; Hydro-lyases>	map00030	Pentose phosphate pathway	bbr	ssp	mxa		hpa	lin	eco	son	ama		bpa	bbr	gka	lpf	ngo	sme	cte	cli	tdn	aae	hth	nam
		x	C01302	1-(2-Carboxyphenylamino)-1-deoxy-D-ribulose 5-phosphate	C03506	Indoleglycerol phosphate;	4.1.1.48	indole-3-glycerol-phosphate synthase;	map00400	Phenylalanine, tyrosine and tryptophan biosynthesis	bbr	ssp	mxa	lil	hpa	lin	eco	son			bpa	bbr	gka	lpf	ngo	sme	cte	cli	tdn	aae	hth	nam
		x	C01302	1-(2-Carboxyphenylamino)-1-deoxy-D-ribulose 5-phosphate	C04302	N-(5-Phospho-D-ribosyl)anthranilate;	5.3.1.24	phosphoribosylanthranilate isomerase;	map00400	Phenylalanine, tyrosine and tryptophan biosynthesis	bbr	ssp	mxa	lil	hpa	lin	eco	son			bpa	bbr	gka	lpf	ngo	sme	cte	cli	tdn	aae	hth	nam
		x	C00108	Anthranilate;	C04302	N-(5-Phospho-D-ribosyl)anthranilate;	2.4.2.18	anthranilate phosphoribosyltransferase;	map00400	Phenylalanine, tyrosine and tryptophan biosynthesis	bbr	ssp	mxa	lil	hpa	lin	eco	son			bpa	bbr	gka	lpf	ngo	sme	cte	cli	tdn	aae	hth	nam
		x	C00108	Anthranilate;	C00251	Chorismate;	4.1.3.27	anthranilate synthase;	map00400	Phenylalanine, tyrosine and tryptophan biosynthesis	bbr	ssp	mxa	lil	hpa	lin	eco	son		bba	bpa	bbr	gka	lpf	ngo	sme	cte	cli	tdn	aae	hth	nam
		x	C00251	Chorismate;	C01269	5-O-(1-Carboxyvinyl)-3-phosphoshikimate;	4.2.3.5	chorismate synthase;	map00400	Phenylalanine, tyrosine and tryptophan biosynthesis	bbr	ssp	mxa	lil	hpa	lin	eco	son		bba	bpa	bbr	gka	lpf	ngo	sme	cte	cli	tdn	aae	hth	nam
		x	C01269	5-O-(1-Carboxyvinyl)-3-phosphoshikimate;	C03175	Shikimate 3-phosphate;	2.5.1.19	3-phosphoshikimate 1-carboxyvinyltransferase;	map00400	Phenylalanine, tyrosine and tryptophan biosynthesis	bbr	ssp	mxa	lil	hpa	lin	eco	son	ama	bba	bpa	bbr	gka	lpf	ngo	sme	cte	cli	tdn	aae	hth	nam
		x	C00493	Shikimate;	C03175	Shikimate 3-phosphate;	2.7.1.71	shikimate kinase;	map00400	Phenylalanine, tyrosine and tryptophan biosynthesis	bbr	ssp	mxa	lil	hpa	lin	eco	son			bpa	bbr	gka	lpf	ngo	sme	cte	cli	tdn	aae	hth	nam
Subsystem 9	0.0011258091753447786										bbr	ssp	mxa	lil	hpa		eco	son		bba	bpa	bbr	gka	lpf		sme
		i	C02166	Leukotriene C4;	C05951	Leukotriene D4;	2.3.2.2	gamma-glutamyltransferase;	map00590	Arachidonic acid metabolism	bbr	ssp	mxa	lil	hpa		eco	son		bba	bpa	bbr	gka	lpf		sme
Subsystem 10	0.0028145229383619475										bbr	ssp	mxa	lil		lin	eco	son			bpa	bbr	gka		ngo	sme
		i	C00022	Pyruvate;	C00024	Acetyl-CoA;	1.2.4.1	pyruvate dehydrogenase (acetyl-transferring);	map00010; map00020; map00290; map00620; map00650	Glycolysis / Gluconeogenesis; Citrate cycle (TCA cycle); Valine, leucine and isoleucine biosynthesis; Pyruvate metabolism; Butanoate metabolism	bbr	ssp	mxa	lil		lin	eco	son	ama	bba	bpa	bbr	gka	lpf	ngo	sme					hth	nam
		s	C00095	D-Fructose;	C01094	D-Fructose 1-phosphate	2.7.1.69	protein-Npi-phosphohistidine---sugar phosphotransferase;	map00051	Fructose and mannose metabolism	bbr	ssp	mxa	lil		lin	eco	son			bpa	bbr	gka		ngo	sme	cte
		x	C00024	Acetyl-CoA;	C03939	Acetyl-[acyl-carrier protein]	2.3.1.-	<Transferases; Acyltransferases; Transferring groups other than amino-acyl groups>	map00061	Fatty acid biosynthesis	bbr	ssp	mxa	lil	hpa	lin	eco	son		bba	bpa	bbr	gka	lpf	ngo	sme	cte	cli	tdn	aae	hth	nam
		x	C03939	Acetyl-[acyl-carrier protein]	C05744	Acetoacetyl-[acp];	2.3.1.-	<Transferases; Acyltransferases; Transferring groups other than amino-acyl groups>	map00061	Fatty acid biosynthesis	bbr	ssp	mxa	lil	hpa	lin	eco	son		bba	bpa	bbr	gka	lpf	ngo	sme	cte	cli	tdn	aae	hth	nam
		x	C00024	Acetyl-CoA;	C03939	Acetyl-[acyl-carrier protein]	2.3.1.180	beta-ketoacyl-acyl-carrier-protein synthase III;	map00061	Fatty acid biosynthesis	bbr	ssp	mxa	lil	hpa	lin	eco	son	ama	bba	bpa	bbr	gka	lpf	ngo	sme	cte	cli	tdn	aae	hth	nam
		x	C01209	Malonyl-[acyl-carrier protein]	C05744	Acetoacetyl-[acp];	2.3.1.-	<Transferases; Acyltransferases; Transferring groups other than amino-acyl groups>	map00061	Fatty acid biosynthesis	bbr	ssp	mxa	lil	hpa	lin	eco	son		bba	bpa	bbr	gka	lpf	ngo	sme	cte	cli	tdn	aae	hth	nam
		x	C01209	Malonyl-[acyl-carrier protein]	C05750	3-Oxooctanoyl-[acp];	2.3.1.-	<Transferases; Acyltransferases; Transferring groups other than amino-acyl groups>	map00061	Fatty acid biosynthesis	bbr	ssp	mxa	lil	hpa	lin	eco	son		bba	bpa	bbr	gka	lpf	ngo	sme	cte	cli	tdn	aae	hth	nam
		x	C01209	Malonyl-[acyl-carrier protein]	C05762	3-Oxohexadecanoyl-[acp];	2.3.1.-	<Transferases; Acyltransferases; Transferring groups other than amino-acyl groups>	map00061	Fatty acid biosynthesis	bbr	ssp	mxa	lil	hpa	lin	eco	son		bba	bpa	bbr	gka	lpf	ngo	sme	cte	cli	tdn	aae	hth	nam
		x	C04633	(3R)-3-Hydroxypalmitoyl-[acyl-carrier protein];	C05762	3-Oxohexadecanoyl-[acp];	2.3.1.-	<Transferases; Acyltransferases; Transferring groups other than amino-acyl groups>	map00061	Fatty acid biosynthesis	bbr	ssp	mxa	lil	hpa	lin	eco	son		bba	bpa	bbr	gka	lpf	ngo	sme	cte	cli	tdn	aae	hth	nam
		x	C01209	Malonyl-[acyl-carrier protein]	C05753	3-Oxodecanoyl-[acp];	2.3.1.-	<Transferases; Acyltransferases; Transferring groups other than amino-acyl groups>	map00061	Fatty acid biosynthesis	bbr	ssp	mxa	lil	hpa	lin	eco	son		bba	bpa	bbr	gka	lpf	ngo	sme	cte	cli	tdn	aae	hth	nam
		x	C05752	Octanoyl-[acp];	C05753	3-Oxodecanoyl-[acp];	2.3.1.179	beta-ketoacyl-acyl-carrier-protein synthase II;	map00061	Fatty acid biosynthesis	bbr	ssp	mxa	lil	hpa	lin	eco	son	ama	bba	bpa	bbr	gka	lpf	ngo	sme	cte	cli	tdn	aae	hth	nam
		x	C01209	Malonyl-[acyl-carrier protein]	C05753	3-Oxodecanoyl-[acp];	2.3.1.179	beta-ketoacyl-acyl-carrier-protein synthase II;	map00061	Fatty acid biosynthesis	bbr	ssp	mxa	lil	hpa	lin	eco	son	ama	bba	bpa	bbr	gka	lpf	ngo	sme	cte	cli	tdn	aae	hth	nam
		x	C04620	(3R)-3-Hydroxyoctanoyl-[acyl-carrier protein];	C05750	3-Oxooctanoyl-[acp];	2.3.1.-	<Transferases; Acyltransferases; Transferring groups other than amino-acyl groups>	map00061	Fatty acid biosynthesis	bbr	ssp	mxa	lil	hpa	lin	eco	son		bba	bpa	bbr	gka	lpf	ngo	sme	cte	cli	tdn	aae	hth	nam
		x	C04620	(3R)-3-Hydroxyoctanoyl-[acyl-carrier protein];	C05751	trans-Oct-2-enoyl-[acp];	2.3.1.-	<Transferases; Acyltransferases; Transferring groups other than amino-acyl groups>	map00061	Fatty acid biosynthesis	bbr	ssp	mxa	lil	hpa	lin	eco	son		bba	bpa	bbr	gka	lpf	ngo	sme	cte	cli	tdn	aae	hth	nam
		x	C01209	Malonyl-[acyl-carrier protein]	C05759	3-Oxotetradecanoyl-[acp];	2.3.1.179	beta-ketoacyl-acyl-carrier-protein synthase II;	map00061	Fatty acid biosynthesis	bbr	ssp	mxa	lil	hpa	lin	eco	son	ama	bba	bpa	bbr	gka	lpf	ngo	sme	cte	cli	tdn	aae	hth	nam
		x	C04688	(3R)-3-Hydroxytetradecanoyl-[acyl-carrier protein];	C05759	3-Oxotetradecanoyl-[acp];	2.3.1.-	<Transferases; Acyltransferases; Transferring groups other than amino-acyl groups>	map00061	Fatty acid biosynthesis	bbr	ssp	mxa	lil	hpa	lin	eco	son		bba	bpa	bbr	gka	lpf	ngo	sme	cte	cli	tdn	aae	hth	nam
		x	C05223	Dodecanoyl-[acyl-carrier protein];	C05759	3-Oxotetradecanoyl-[acp];	2.3.1.179	beta-ketoacyl-acyl-carrier-protein synthase II;	map00061	Fatty acid biosynthesis	bbr	ssp	mxa	lil	hpa	lin	eco	son	ama	bba	bpa	bbr	gka	lpf	ngo	sme	cte	cli	tdn	aae	hth	nam
		x	C05749	Hexanoyl-[acp];	C05750	3-Oxooctanoyl-[acp];	2.3.1.179	beta-ketoacyl-acyl-carrier-protein synthase II;	map00061	Fatty acid biosynthesis	bbr	ssp	mxa	lil	hpa	lin	eco	son	ama	bba	bpa	bbr	gka	lpf	ngo	sme	cte	cli	tdn	aae	hth	nam
		x	C05748	trans-Hex-2-enoyl-[acp];	C05749	Hexanoyl-[acp];	2.3.1.-	<Transferases; Acyltransferases; Transferring groups other than amino-acyl groups>	map00061	Fatty acid biosynthesis	bbr	ssp	mxa	lil	hpa	lin	eco	son		bba	bpa	bbr	gka	lpf	ngo	sme	cte	cli	tdn	aae	hth	nam
		x	C01209	Malonyl-[acyl-carrier protein]	C05759	3-Oxotetradecanoyl-[acp];	2.3.1.-	<Transferases; Acyltransferases; Transferring groups other than amino-acyl groups>	map00061	Fatty acid biosynthesis	bbr	ssp	mxa	lil	hpa	lin	eco	son		bba	bpa	bbr	gka	lpf	ngo	sme	cte	cli	tdn	aae	hth	nam
		x	C03939	Acetyl-[acyl-carrier protein]	C05744	Acetoacetyl-[acp];	2.3.1.180	beta-ketoacyl-acyl-carrier-protein synthase III;	map00061	Fatty acid biosynthesis	bbr	ssp	mxa	lil	hpa	lin	eco	son	ama	bba	bpa	bbr	gka	lpf	ngo	sme	cte	cli	tdn	aae	hth	nam
		x	C03939	Acetyl-[acyl-carrier protein]	C05744	Acetoacetyl-[acp];	2.3.1.179	beta-ketoacyl-acyl-carrier-protein synthase II;	map00061	Fatty acid biosynthesis	bbr	ssp	mxa	lil	hpa	lin	eco	son	ama	bba	bpa	bbr	gka	lpf	ngo	sme	cte	cli	tdn	aae	hth	nam
		x	C01209	Malonyl-[acyl-carrier protein]	C05756	3-Oxododecanoyl-[acp];	2.3.1.179	beta-ketoacyl-acyl-carrier-protein synthase II;	map00061	Fatty acid biosynthesis	bbr	ssp	mxa	lil	hpa	lin	eco	son	ama	bba	bpa	bbr	gka	lpf	ngo	sme	cte	cli	tdn	aae	hth	nam
		x	C05755	Decanoyl-[acp];	C05756	3-Oxododecanoyl-[acp];	2.3.1.179	beta-ketoacyl-acyl-carrier-protein synthase II;	map00061	Fatty acid biosynthesis	bbr	ssp	mxa	lil	hpa	lin	eco	son	ama	bba	bpa	bbr	gka	lpf	ngo	sme	cte	cli	tdn	aae	hth	nam
		x	C05754	trans-Dec-2-enoyl-[acp];	C05755	Decanoyl-[acp];	2.3.1.-	<Transferases; Acyltransferases; Transferring groups other than amino-acyl groups>	map00061	Fatty acid biosynthesis	bbr	ssp	mxa	lil	hpa	lin	eco	son		bba	bpa	bbr	gka	lpf	ngo	sme	cte	cli	tdn	aae	hth	nam
		x	C05756	3-Oxododecanoyl-[acp];	C05757	(R)-3-Hydroxydodecanoyl-[acp];	2.3.1.-	<Transferases; Acyltransferases; Transferring groups other than amino-acyl groups>	map00061	Fatty acid biosynthesis	bbr	ssp	mxa	lil	hpa	lin	eco	son		bba	bpa	bbr	gka	lpf	ngo	sme	cte	cli	tdn	aae	hth	nam
		x	C05757	(R)-3-Hydroxydodecanoyl-[acp];	C05758	trans-Dodec-2-enoyl-[acp];	2.3.1.-	<Transferases; Acyltransferases; Transferring groups other than amino-acyl groups>	map00061	Fatty acid biosynthesis	bbr	ssp	mxa	lil	hpa	lin	eco	son		bba	bpa	bbr	gka	lpf	ngo	sme	cte	cli	tdn	aae	hth	nam
		x	C04633	(3R)-3-Hydroxypalmitoyl-[acyl-carrier protein];	C05763	trans-Hexadec-2-enoyl-[acp];	2.3.1.-	<Transferases; Acyltransferases; Transferring groups other than amino-acyl groups>	map00061	Fatty acid biosynthesis	bbr	ssp	mxa	lil	hpa	lin	eco	son		bba	bpa	bbr	gka	lpf	ngo	sme	cte	cli	tdn	aae	hth	nam
		x	C05749	Hexanoyl-[acp];	C05750	3-Oxooctanoyl-[acp];	2.3.1.-	<Transferases; Acyltransferases; Transferring groups other than amino-acyl groups>	map00061	Fatty acid biosynthesis	bbr	ssp	mxa	lil	hpa	lin	eco	son		bba	bpa	bbr	gka	lpf	ngo	sme	cte	cli	tdn	aae	hth	nam
		x	C01209	Malonyl-[acyl-carrier protein]	C05746	3-Oxohexanoyl-[acp];	2.3.1.-	<Transferases; Acyltransferases; Transferring groups other than amino-acyl groups>	map00061	Fatty acid biosynthesis	bbr	ssp	mxa	lil	hpa	lin	eco	son		bba	bpa	bbr	gka	lpf	ngo	sme	cte	cli	tdn	aae	hth	nam
		x	C05746	3-Oxohexanoyl-[acp];	C05747	(R)-3-Hydroxyhexanoyl-[acp];	1.1.1.100	3-oxoacyl-[acyl-carrier-protein] reductase;	map00061	Fatty acid biosynthesis	bbr	ssp	mxa	lil	hpa	lin	eco	son	ama	bba	bpa	bbr	gka	lpf	ngo	sme	cte	cli	tdn	aae	hth	nam
		x	C05755	Decanoyl-[acp];	C05756	3-Oxododecanoyl-[acp];	2.3.1.-	<Transferases; Acyltransferases; Transferring groups other than amino-acyl groups>	map00061	Fatty acid biosynthesis	bbr	ssp	mxa	lil	hpa	lin	eco	son		bba	bpa	bbr	gka	lpf	ngo	sme	cte	cli	tdn	aae	hth	nam
		x	C05747	(R)-3-Hydroxyhexanoyl-[acp];	C05748	trans-Hex-2-enoyl-[acp];	2.3.1.-	<Transferases; Acyltransferases; Transferring groups other than amino-acyl groups>	map00061	Fatty acid biosynthesis	bbr	ssp	mxa	lil	hpa	lin	eco	son		bba	bpa	bbr	gka	lpf	ngo	sme	cte	cli	tdn	aae	hth	nam
		x	C00022	Pyruvate;	C00024	Acetyl-CoA;	2.3.1.12	dihydrolipoyllysine-residue acetyltransferase;	map00010; map00020; map00620	Glycolysis / Gluconeogenesis; Citrate cycle (TCA cycle); Pyruvate metabolism	bbr	ssp	mxa	lil		lin	eco	son	ama	bba	bpa	bbr	gka	lpf	ngo	sme					hth	nam
		x	C01209	Malonyl-[acyl-carrier protein]	C05746	3-Oxohexanoyl-[acp];	2.3.1.179	beta-ketoacyl-acyl-carrier-protein synthase II;	map00061	Fatty acid biosynthesis	bbr	ssp	mxa	lil	hpa	lin	eco	son	ama	bba	bpa	bbr	gka	lpf	ngo	sme	cte	cli	tdn	aae	hth	nam
		x	C04688	(3R)-3-Hydroxytetradecanoyl-[acyl-carrier protein];	C05760	trans-Tetradec-2-enoyl-[acp];	2.3.1.-	<Transferases; Acyltransferases; Transferring groups other than amino-acyl groups>	map00061	Fatty acid biosynthesis	bbr	ssp	mxa	lil	hpa	lin	eco	son		bba	bpa	bbr	gka	lpf	ngo	sme	cte	cli	tdn	aae	hth	nam
		x	C05760	trans-Tetradec-2-enoyl-[acp];	C05761	Tetradecanoyl-[acp];	2.3.1.-	<Transferases; Acyltransferases; Transferring groups other than amino-acyl groups>	map00061	Fatty acid biosynthesis	bbr	ssp	mxa	lil	hpa	lin	eco	son		bba	bpa	bbr	gka	lpf	ngo	sme	cte	cli	tdn	aae	hth	nam
		x	C05751	trans-Oct-2-enoyl-[acp];	C05752	Octanoyl-[acp];	2.3.1.-	<Transferases; Acyltransferases; Transferring groups other than amino-acyl groups>	map00061	Fatty acid biosynthesis	bbr	ssp	mxa	lil	hpa	lin	eco	son		bba	bpa	bbr	gka	lpf	ngo	sme	cte	cli	tdn	aae	hth	nam
		x	C00022	Pyruvate;	C05125	2-(alpha-Hydroxyethyl)thiamine diphosphate;	1.2.4.1	pyruvate dehydrogenase (acetyl-transferring);	map00010; map00020; map00290; map00620; map00650	Glycolysis / Gluconeogenesis; Citrate cycle (TCA cycle); Valine, leucine and isoleucine biosynthesis; Pyruvate metabolism; Butanoate metabolism	bbr	ssp	mxa	lil		lin	eco	son	ama	bba	bpa	bbr	gka	lpf	ngo	sme					hth	nam
		x	C05125	2-(alpha-Hydroxyethyl)thiamine diphosphate;	C06006	(S)-2-Aceto-2-hydroxybutanoate;	2.2.1.6	acetolactate synthase;	map00290	Valine, leucine and isoleucine biosynthesis	bbr	ssp	mxa	lil		lin	eco	son			bpa	bbr	gka		ngo	sme	cte	cli	tdn	aae	hth	nam
		x	C00109	2-Oxobutanoate;	C06006	(S)-2-Aceto-2-hydroxybutanoate;	2.2.1.6	acetolactate synthase;	map00290	Valine, leucine and isoleucine biosynthesis	bbr	ssp	mxa	lil		lin	eco	son			bpa	bbr	gka		ngo	sme	cte	cli	tdn	aae	hth	nam
		x	C00022	Pyruvate;	C05125	2-(alpha-Hydroxyethyl)thiamine diphosphate;	2.2.1.6	acetolactate synthase;	map00290; map00650	Valine, leucine and isoleucine biosynthesis; Butanoate metabolism	bbr	ssp	mxa	lil		lin	eco	son			bpa	bbr	gka		ngo	sme	cte	cli	tdn	aae	hth	nam
		x	C01209	Malonyl-[acyl-carrier protein]	C05744	Acetoacetyl-[acp];	2.3.1.179	beta-ketoacyl-acyl-carrier-protein synthase II;	map00061	Fatty acid biosynthesis	bbr	ssp	mxa	lil	hpa	lin	eco	son	ama	bba	bpa	bbr	gka	lpf	ngo	sme	cte	cli	tdn	aae	hth	nam
		x	C00022	Pyruvate;	C00074	Phosphoenolpyruvate;	2.7.1.40	pyruvate kinase;	map00010; map00620; map00710	Glycolysis / Gluconeogenesis; Pyruvate metabolism; Carbon fixation in photosynthetic organisms	bbr	ssp	mxa	lil		lin	eco	son		bba	bpa	bbr	gka	lpf	ngo	sme						nam
		x	C01209	Malonyl-[acyl-carrier protein]	C05756	3-Oxododecanoyl-[acp];	2.3.1.-	<Transferases; Acyltransferases; Transferring groups other than amino-acyl groups>	map00061	Fatty acid biosynthesis	bbr	ssp	mxa	lil	hpa	lin	eco	son		bba	bpa	bbr	gka	lpf	ngo	sme	cte	cli	tdn	aae	hth	nam
		x	C01209	Malonyl-[acyl-carrier protein]	C05750	3-Oxooctanoyl-[acp];	2.3.1.179	beta-ketoacyl-acyl-carrier-protein synthase II;	map00061	Fatty acid biosynthesis	bbr	ssp	mxa	lil	hpa	lin	eco	son	ama	bba	bpa	bbr	gka	lpf	ngo	sme	cte	cli	tdn	aae	hth	nam
		x	C00024	Acetyl-CoA;	C00158	Citrate;	2.3.3.1	citrate (Si)-synthase;	map00020; map00630	Citrate cycle (TCA cycle); Glyoxylate and dicarboxylate metabolism	bbr	ssp	mxa	lil	hpa	lin	eco	son	ama	bba	bpa	bbr	gka	lpf	ngo	sme	cte	cli	tdn	aae	hth
		x	C00158	Citrate;	C00417	cis-Aconitate;	4.2.1.3	aconitate hydratase;	map00020; map00630; map00720	Citrate cycle (TCA cycle); Glyoxylate and dicarboxylate metabolism; Reductive carboxylate cycle (CO2 fixation)	bbr	ssp	mxa	lil	hpa	lin	eco	son	ama	bba	bpa	bbr	gka	lpf	ngo	sme	cte	cli	tdn	aae	hth	nam
		x	C05125	2-(alpha-Hydroxyethyl)thiamine diphosphate;	C06010	(S)-2-Acetolactate;	2.2.1.6	acetolactate synthase;	map00290	Valine, leucine and isoleucine biosynthesis	bbr	ssp	mxa	lil		lin	eco	son			bpa	bbr	gka		ngo	sme	cte	cli	tdn	aae	hth	nam
		x	C00022	Pyruvate;	C00024	Acetyl-CoA;	1.8.1.4	dihydrolipoyl dehydrogenase;	map00010; map00020; map00620	Glycolysis / Gluconeogenesis; Citrate cycle (TCA cycle); Pyruvate metabolism	bbr	ssp	mxa	lil		lin	eco	son	ama	bba	bpa	bbr	gka	lpf	ngo	sme	cte	cli		aae	hth	nam
		x	C00036	Oxaloacetate;	C00158	Citrate;	2.3.3.1	citrate (Si)-synthase;	map00020; map00630	Citrate cycle (TCA cycle); Glyoxylate and dicarboxylate metabolism	bbr	ssp	mxa	lil	hpa	lin	eco	son	ama	bba	bpa	bbr	gka	lpf	ngo	sme	cte	cli	tdn	aae	hth
		x	C00111	Glycerone phosphate;	C01094	D-Fructose 1-phosphate	4.1.2.13	fructose-bisphosphate aldolase;	map00051	Fructose and mannose metabolism	bbr	ssp	mxa	lil	hpa	lin	eco	son	ama	bba	bpa	bbr	gka	lpf	ngo	sme	cte	cli	tdn	aae	hth	nam
		x	C01209	Malonyl-[acyl-carrier protein]	C05744	Acetoacetyl-[acp];	2.3.1.180	beta-ketoacyl-acyl-carrier-protein synthase III;	map00061	Fatty acid biosynthesis	bbr	ssp	mxa	lil	hpa	lin	eco	son	ama	bba	bpa	bbr	gka	lpf	ngo	sme	cte	cli	tdn	aae	hth	nam
		x	C05746	3-Oxohexanoyl-[acp];	C05747	(R)-3-Hydroxyhexanoyl-[acp];	2.3.1.-	<Transferases; Acyltransferases; Transferring groups other than amino-acyl groups>	map00061	Fatty acid biosynthesis	bbr	ssp	mxa	lil	hpa	lin	eco	son		bba	bpa	bbr	gka	lpf	ngo	sme	cte	cli	tdn	aae	hth	nam
		x	C04619	(3R)-3-Hydroxydecanoyl-[acyl-carrier protein];	C05753	3-Oxodecanoyl-[acp];	1.1.1.100	3-oxoacyl-[acyl-carrier-protein] reductase;	map00061	Fatty acid biosynthesis	bbr	ssp	mxa	lil	hpa	lin	eco	son	ama	bba	bpa	bbr	gka	lpf	ngo	sme	cte	cli	tdn	aae	hth	nam
		x	C00074	Phosphoenolpyruvate;	C04691	2-Dehydro-3-deoxy-D-arabino-heptonate 7-phosphate;	2.5.1.54	3-deoxy-7-phosphoheptulonate synthase;	map00400	Phenylalanine, tyrosine and tryptophan biosynthesis	bbr	ssp	mxa	lil	hpa	lin	eco	son		bba	bpa	bbr	gka	lpf	ngo	sme	cte	cli	tdn			nam
		x	C00944	3-Dehydroquinate;	C04691	2-Dehydro-3-deoxy-D-arabino-heptonate 7-phosphate;	4.2.3.4	3-dehydroquinate synthase;	map00400	Phenylalanine, tyrosine and tryptophan biosynthesis	bbr	ssp	mxa	lil	hpa	lin	eco	son		bba	bpa	bbr	gka	lpf	ngo	sme	cte	cli	tdn			nam
		x	C00279	D-Erythrose 4-phosphate	C04691	2-Dehydro-3-deoxy-D-arabino-heptonate 7-phosphate;	2.5.1.54	3-deoxy-7-phosphoheptulonate synthase;	map00400	Phenylalanine, tyrosine and tryptophan biosynthesis	bbr	ssp	mxa	lil	hpa	lin	eco	son		bba	bpa	bbr	gka	lpf	ngo	sme	cte	cli	tdn			nam
		x	C00279	D-Erythrose 4-phosphate	C05382	Sedoheptulose 7-phosphate;	2.2.1.2	transaldolase;	map00030	Pentose phosphate pathway	bbr	ssp	mxa	lil	hpa	lin	eco	son	ama	bba	bpa	bbr	gka		ngo	sme	cte	cli	tdn	aae	hth	nam
		x	C00231	D-Xylulose 5-phosphate	C05382	Sedoheptulose 7-phosphate;	2.2.1.1	transketolase;	map00030; map00710	Pentose phosphate pathway; Carbon fixation in photosynthetic organisms	bbr	ssp	mxa	lil	hpa	lin	eco	son	ama	bba	bpa	bbr	gka	lpf	ngo	sme	cte	cli	tdn	aae	hth	nam
		x	C00199	D-Ribulose 5-phosphate	C00231	D-Xylulose 5-phosphate	5.1.3.1	ribulose-phosphate 3-epimerase;	map00030; map00040; map00710	Pentose phosphate pathway; Pentose and glucuronate interconversions; Carbon fixation in photosynthetic organisms	bbr	ssp	mxa	lil	hpa	lin	eco	son	ama	bba	bpa	bbr	gka	lpf	ngo	sme	cte	cli	tdn	aae	hth	nam
		x	C00118	D-Glyceraldehyde 3-phosphate;	C00231	D-Xylulose 5-phosphate	2.2.1.1	transketolase;	map00030; map00710	Pentose phosphate pathway; Carbon fixation in photosynthetic organisms	bbr	ssp	mxa	lil	hpa	lin	eco	son	ama	bba	bpa	bbr	gka	lpf	ngo	sme	cte	cli	tdn	aae	hth	nam
		x	C00118	D-Glyceraldehyde 3-phosphate;	C05345	beta-D-Fructose 6-phosphate	2.2.1.2	transaldolase;	map00030	Pentose phosphate pathway	bbr	ssp	mxa	lil	hpa	lin	eco	son	ama	bba	bpa	bbr	gka		ngo	sme	cte	cli	tdn	aae	hth	nam
		x	C00668	alpha-D-Glucose 6-phosphate	C05345	beta-D-Fructose 6-phosphate	5.3.1.9	glucose-6-phosphate isomerase;	map00010; map00030; map00500; map00520	Glycolysis / Gluconeogenesis; Pentose phosphate pathway; Starch and sucrose metabolism; Amino sugar and nucleotide sugar metabolism	bbr	ssp	mxa	lil	hpa	lin	eco	son		bba	bpa	bbr	gka	lpf	ngo	sme	cte	cli	tdn	aae	hth	nam
		x	C00231	D-Xylulose 5-phosphate	C05345	beta-D-Fructose 6-phosphate	2.2.1.1	transketolase;	map00030	Pentose phosphate pathway	bbr	ssp	mxa	lil	hpa	lin	eco	son	ama	bba	bpa	bbr	gka	lpf	ngo	sme	cte	cli	tdn	aae	hth	nam
		x	C00118	D-Glyceraldehyde 3-phosphate;	C00236	3-Phospho-D-glyceroyl phosphate;	1.2.1.12	glyceraldehyde-3-phosphate dehydrogenase (phosphorylating);	map00010	Glycolysis / Gluconeogenesis	bbr	ssp	mxa	lil	hpa	lin	eco	son	ama	bba	bpa	bbr	gka	lpf	ngo	sme	cte	cli	tdn	aae	hth	nam
		x	C00118	D-Glyceraldehyde 3-phosphate;	C00279	D-Erythrose 4-phosphate	2.2.1.1	transketolase;	map00030; map00710	Pentose phosphate pathway; Carbon fixation in photosynthetic organisms	bbr	ssp	mxa	lil	hpa	lin	eco	son	ama	bba	bpa	bbr	gka	lpf	ngo	sme	cte	cli	tdn	aae	hth	nam
		x	C00668	alpha-D-Glucose 6-phosphate	C01172	beta-D-Glucose 6-phosphate	5.3.1.9	glucose-6-phosphate isomerase;	map00010; map00030; map00500	Glycolysis / Gluconeogenesis; Pentose phosphate pathway; Starch and sucrose metabolism	bbr	ssp	mxa	lil	hpa	lin	eco	son		bba	bpa	bbr	gka	lpf	ngo	sme	cte	cli	tdn	aae	hth	nam
		x	C00118	D-Glyceraldehyde 3-phosphate;	C00279	D-Erythrose 4-phosphate	2.2.1.2	transaldolase;	map00030	Pentose phosphate pathway	bbr	ssp	mxa	lil	hpa	lin	eco	son	ama	bba	bpa	bbr	gka		ngo	sme	cte	cli	tdn	aae	hth	nam
		x	C00197	3-Phospho-D-glycerate;	C00236	3-Phospho-D-glyceroyl phosphate;	2.7.2.3	phosphoglycerate kinase;	map00010; map00710	Glycolysis / Gluconeogenesis; Carbon fixation in photosynthetic organisms	bbr	ssp	mxa	lil	hpa	lin	eco	son	ama	bba	bpa	bbr	gka	lpf	ngo	sme	cte	cli	tdn	aae	hth	nam
		x	C00197	3-Phospho-D-glycerate;	C00631	2-Phospho-D-glycerate;	5.4.2.1	phosphoglycerate mutase;	map00010	Glycolysis / Gluconeogenesis	bbr	ssp	mxa	lil	hpa	lin	eco	son	ama	bba	bpa	bbr	gka	lpf	ngo	sme	cte	cli	tdn	aae	hth	nam
		x	C01172	beta-D-Glucose 6-phosphate	C05345	beta-D-Fructose 6-phosphate	5.3.1.9	glucose-6-phosphate isomerase;	map00010; map00030; map00500	Glycolysis / Gluconeogenesis; Pentose phosphate pathway; Starch and sucrose metabolism	bbr	ssp	mxa	lil	hpa	lin	eco	son		bba	bpa	bbr	gka	lpf	ngo	sme	cte	cli	tdn	aae	hth	nam
		x	C00118	D-Glyceraldehyde 3-phosphate;	C05378	beta-D-Fructose 1,6-bisphosphate	4.1.2.13	fructose-bisphosphate aldolase;	map00010; map00030; map00051	Glycolysis / Gluconeogenesis; Pentose phosphate pathway; Fructose and mannose metabolism	bbr	ssp	mxa	lil	hpa	lin	eco	son	ama	bba	bpa	bbr	gka	lpf	ngo	sme	cte	cli	tdn	aae	hth	nam
		x	C00117	D-Ribose 5-phosphate;	C00118	D-Glyceraldehyde 3-phosphate;	2.2.1.1	transketolase;	map00030; map00710	Pentose phosphate pathway; Carbon fixation in photosynthetic organisms	bbr	ssp	mxa	lil	hpa	lin	eco	son	ama	bba	bpa	bbr	gka	lpf	ngo	sme	cte	cli	tdn	aae	hth	nam
		x	C00117	D-Ribose 5-phosphate;	C00119	5-Phospho-alpha-D-ribose 1-diphosphate;	2.7.6.1	ribose-phosphate diphosphokinase;	map00030; map00230	Pentose phosphate pathway; Purine metabolism	bbr	ssp	mxa	lil	hpa	lin	eco	son	ama	bba	bpa	bbr	gka	lpf	ngo	sme	cte	cli	tdn	aae	hth	nam
		x	C00119	5-Phospho-alpha-D-ribose 1-diphosphate;	C03090	5-Phosphoribosylamine;	2.4.2.14	amidophosphoribosyltransferase;	map00230	Purine metabolism	bbr	ssp	mxa	lil		lin	eco	son	ama	bba	bpa	bbr	gka	lpf	ngo	sme	cte	cli	tdn	aae	hth	nam
		x	C00119	5-Phospho-alpha-D-ribose 1-diphosphate;	C02739	1-(5-Phospho-D-ribosyl)-ATP;	2.4.2.17	ATP phosphoribosyltransferase;	map00340	Histidine metabolism	bbr	ssp	mxa	lil		lin	eco	son			bpa	bbr	gka	lpf	ngo	sme	cte	cli	tdn	aae	hth	nam
		x	C03090	5-Phosphoribosylamine;	C03838	5'-Phosphoribosylglycinamide;	6.3.4.13	phosphoribosylamine---glycine ligase;	map00230	Purine metabolism	bbr	ssp	mxa	lil	hpa	lin	eco	son	ama	bba	bpa	bbr	gka	lpf	ngo	sme	cte	cli	tdn	aae	hth	nam
		x	C05345	beta-D-Fructose 6-phosphate	C05378	beta-D-Fructose 1,6-bisphosphate	3.1.3.11	fructose-bisphosphatase;	map00010; map00030; map00051	Glycolysis / Gluconeogenesis; Pentose phosphate pathway; Fructose and mannose metabolism	bbr	ssp	mxa	lil	hpa	lin	eco	son	ama	bba	bpa	bbr	gka		ngo	sme	cte	cli	tdn			nam
		x	C01209	Malonyl-[acyl-carrier protein]	C05762	3-Oxohexadecanoyl-[acp];	2.3.1.179	beta-ketoacyl-acyl-carrier-protein synthase II;	map00061	Fatty acid biosynthesis	bbr	ssp	mxa	lil	hpa	lin	eco	son	ama	bba	bpa	bbr	gka	lpf	ngo	sme	cte	cli	tdn	aae	hth	nam
		x	C04619	(3R)-3-Hydroxydecanoyl-[acyl-carrier protein];	C05754	trans-Dec-2-enoyl-[acp];	2.3.1.-	<Transferases; Acyltransferases; Transferring groups other than amino-acyl groups>	map00061	Fatty acid biosynthesis	bbr	ssp	mxa	lil	hpa	lin	eco	son		bba	bpa	bbr	gka	lpf	ngo	sme	cte	cli	tdn	aae	hth	nam
		x	C00119	5-Phospho-alpha-D-ribose 1-diphosphate;	C01103	Orotidine 5'-phosphate;	2.4.2.10	orotate phosphoribosyltransferase;	map00240	Pyrimidine metabolism	bbr	ssp	mxa	lil	hpa	lin	eco	son	ama	bba	bpa	bbr	gka	lpf	ngo	sme	cte	cli	tdn	aae	hth	nam
		x	C00105	UMP;	C01103	Orotidine 5'-phosphate;	4.1.1.23	orotidine-5'-phosphate decarboxylase;	map00240	Pyrimidine metabolism	bbr	ssp	mxa	lil	hpa	lin	eco	son	ama	bba	bpa	bbr	gka	lpf	ngo	sme	cte	cli	tdn	aae	hth	nam
		x	C00015	UDP;	C00105	UMP;	2.7.4.14	cytidylate kinase;	map00240	Pyrimidine metabolism	bbr	ssp	mxa	lil		lin	eco	son	ama	bba	bpa	bbr	gka	lpf	ngo	sme	cte	cli		aae	hth
		x	C00015	UDP;	C00075	UTP;	2.7.4.6	nucleoside-diphosphate kinase;	map00240	Pyrimidine metabolism	bbr	ssp	mxa	lil	hpa	lin	eco	son	ama	bba	bpa	bbr	gka	lpf	ngo	sme	cte	cli	tdn	aae	hth	nam
		x	C00063	CTP;	C00075	UTP;	6.3.4.2	CTP synthase;	map00240	Pyrimidine metabolism	bbr	ssp	mxa	lil	hpa	lin	eco	son	ama	bba	bpa	bbr	gka	lpf	ngo	sme	cte	cli	tdn	aae	hth	nam
		x	C00063	CTP;	C00112	CDP;	2.7.4.6	nucleoside-diphosphate kinase;	map00240	Pyrimidine metabolism	bbr	ssp	mxa	lil	hpa	lin	eco	son	ama	bba	bpa	bbr	gka	lpf	ngo	sme	cte	cli	tdn	aae	hth	nam
		x	C00055	CMP;	C00112	CDP;	2.7.4.14	cytidylate kinase;	map00240	Pyrimidine metabolism	bbr	ssp	mxa	lil		lin	eco	son	ama	bba	bpa	bbr	gka	lpf	ngo	sme	cte	cli		aae	hth
		x	C00046	RNA;	C00063	CTP;	2.7.7.6	DNA-directed RNA polymerase;	map00240	Pyrimidine metabolism	bbr	ssp	mxa	lil	hpa	lin	eco	son	ama	bba	bpa	bbr	gka	lpf	ngo	sme	cte	cli	tdn	aae	hth	nam
		x	C00002	ATP;	C00046	RNA;	2.7.7.6	DNA-directed RNA polymerase;	map00230	Purine metabolism	bbr	ssp	mxa	lil	hpa	lin	eco	son	ama	bba	bpa	bbr	gka	lpf	ngo	sme	cte	cli	tdn	aae	hth	nam
		x	C00044	GTP;	C00046	RNA;	2.7.7.6	DNA-directed RNA polymerase;	map00230	Purine metabolism	bbr	ssp	mxa	lil	hpa	lin	eco	son	ama	bba	bpa	bbr	gka	lpf	ngo	sme	cte	cli	tdn	aae	hth	nam
		x	C00035	GDP;	C00044	GTP;	2.7.4.6	nucleoside-diphosphate kinase;	map00230	Purine metabolism	bbr	ssp	mxa	lil	hpa	lin	eco	son	ama	bba	bpa	bbr	gka	lpf	ngo	sme	cte	cli	tdn	aae	hth	nam
		x	C00035	GDP;	C00361	dGDP;	1.17.4.1	ribonucleoside-diphosphate reductase;	map00230	Purine metabolism	bbr	ssp	mxa	lil	hpa	lin	eco	son	ama	bba	bpa	bbr	gka	lpf	ngo	sme	cte	cli	tdn	aae	hth	nam
		x	C00286	dGTP;	C00361	dGDP;	2.7.1.40	pyruvate kinase;	map00230	Purine metabolism	bbr	ssp	mxa	lil		lin	eco	son		bba	bpa	bbr	gka	lpf	ngo	sme						nam
		x	C00039	DNA;	C00286	dGTP;	2.7.7.7	DNA-directed DNA polymerase;	map00230	Purine metabolism	bbr	ssp	mxa	lil	hpa	lin	eco	son	ama	bba	bpa	bbr	gka	lpf	ngo	sme	cte	cli	tdn	aae	hth	nam
		x	C00039	DNA;	C00458	dCTP;	2.7.7.7	DNA-directed DNA polymerase;	map00240	Pyrimidine metabolism	bbr	ssp	mxa	lil	hpa	lin	eco	son	ama	bba	bpa	bbr	gka	lpf	ngo	sme	cte	cli	tdn	aae	hth	nam
		x	C00458	dCTP;	C00705	dCDP;	2.7.4.6	nucleoside-diphosphate kinase;	map00240	Pyrimidine metabolism	bbr	ssp	mxa	lil	hpa	lin	eco	son	ama	bba	bpa	bbr	gka	lpf	ngo	sme	cte	cli	tdn	aae	hth	nam
		x	C00239	dCMP;	C00705	dCDP;	2.7.4.14	cytidylate kinase;	map00240	Pyrimidine metabolism	bbr	ssp	mxa	lil		lin	eco	son	ama	bba	bpa	bbr	gka	lpf	ngo	sme	cte	cli		aae	hth
		x	C00039	DNA;	C00459	dTTP;	2.7.7.7	DNA-directed DNA polymerase;	map00240	Pyrimidine metabolism	bbr	ssp	mxa	lil	hpa	lin	eco	son	ama	bba	bpa	bbr	gka	lpf	ngo	sme	cte	cli	tdn	aae	hth	nam
		x	C00363	dTDP;	C00459	dTTP;	2.7.4.6	nucleoside-diphosphate kinase;	map00240	Pyrimidine metabolism	bbr	ssp	mxa	lil	hpa	lin	eco	son	ama	bba	bpa	bbr	gka	lpf	ngo	sme	cte	cli	tdn	aae	hth	nam
		x	C00363	dTDP;	C00364	dTMP;	2.7.4.9	dTMP kinase;	map00240	Pyrimidine metabolism	bbr	ssp	mxa	lil	hpa	lin	eco	son	ama	bba	bpa	bbr	gka	lpf	ngo	sme	cte	cli	tdn	aae	hth	nam
		x	C00035	GDP;	C00144	GMP;	2.7.4.8	guanylate kinase;	map00230	Purine metabolism	bbr	ssp	mxa	lil	hpa	lin	eco	son	ama	bba	bpa	bbr	gka	lpf	ngo	sme	cte	cli	tdn	aae	hth	nam
		x	C00144	GMP;	C00242	Guanine;	2.4.2.7	adenine phosphoribosyltransferase;	map00230	Purine metabolism	bbr	ssp	mxa	lil	hpa	lin	eco	son		bba	bpa	bbr	gka		ngo	sme	cte	cli	tdn			nam
		x	C00286	dGTP;	C00361	dGDP;	2.7.4.6	nucleoside-diphosphate kinase;	map00230	Purine metabolism	bbr	ssp	mxa	lil	hpa	lin	eco	son	ama	bba	bpa	bbr	gka	lpf	ngo	sme	cte	cli	tdn	aae	hth	nam
		x	C00364	dTMP;	C00365	dUMP;	2.1.1.45	thymidylate synthase;	map00240	Pyrimidine metabolism	bbr	ssp	mxa	lil		lin	eco	son		bba	bpa	bbr	gka	lpf	ngo	sme
		x	C00365	dUMP;	C01346	dUDP;	2.7.4.9	dTMP kinase;	map00240	Pyrimidine metabolism	bbr	ssp	mxa	lil	hpa	lin	eco	son	ama	bba	bpa	bbr	gka	lpf	ngo	sme	cte	cli	tdn	aae	hth	nam
		x	C00460	dUTP;	C01346	dUDP;	2.7.4.6	nucleoside-diphosphate kinase;	map00240	Pyrimidine metabolism	bbr	ssp	mxa	lil	hpa	lin	eco	son	ama	bba	bpa	bbr	gka	lpf	ngo	sme	cte	cli	tdn	aae	hth	nam
		x	C00039	DNA;	C00131	dATP;	2.7.7.7	DNA-directed DNA polymerase;	map00230	Purine metabolism	bbr	ssp	mxa	lil	hpa	lin	eco	son	ama	bba	bpa	bbr	gka	lpf	ngo	sme	cte	cli	tdn	aae	hth	nam
		x	C00131	dATP;	C00206	dADP;	2.7.1.40	pyruvate kinase;	map00230	Purine metabolism	bbr	ssp	mxa	lil		lin	eco	son		bba	bpa	bbr	gka	lpf	ngo	sme						nam
		x	C00206	dADP;	C00360	dAMP;	2.7.4.3	adenylate kinase;	map00230	Purine metabolism	bbr	ssp	mxa	lil	hpa	lin	eco	son	ama	bba	bpa	bbr	gka	lpf	ngo	sme	cte	cli	tdn	aae	hth	nam
		x	C00008	ADP;	C00206	dADP;	1.17.4.1	ribonucleoside-diphosphate reductase;	map00230	Purine metabolism	bbr	ssp	mxa	lil	hpa	lin	eco	son	ama	bba	bpa	bbr	gka	lpf	ngo	sme	cte	cli	tdn	aae	hth	nam
		x	C04633	(3R)-3-Hydroxypalmitoyl-[acyl-carrier protein];	C05762	3-Oxohexadecanoyl-[acp];	1.1.1.100	3-oxoacyl-[acyl-carrier-protein] reductase;	map00061	Fatty acid biosynthesis	bbr	ssp	mxa	lil	hpa	lin	eco	son	ama	bba	bpa	bbr	gka	lpf	ngo	sme	cte	cli	tdn	aae	hth	nam
		x	C00361	dGDP;	C00362	dGMP;	2.7.4.8	guanylate kinase;	map00230	Purine metabolism	bbr	ssp	mxa	lil	hpa	lin	eco	son	ama	bba	bpa	bbr	gka	lpf	ngo	sme	cte	cli	tdn	aae	hth	nam
		x	C05756	3-Oxododecanoyl-[acp];	C05757	(R)-3-Hydroxydodecanoyl-[acp];	1.1.1.100	3-oxoacyl-[acyl-carrier-protein] reductase;	map00061	Fatty acid biosynthesis	bbr	ssp	mxa	lil	hpa	lin	eco	son	ama	bba	bpa	bbr	gka	lpf	ngo	sme	cte	cli	tdn	aae	hth	nam
		x	C04618	(3R)-3-Hydroxybutanoyl-[acyl-carrier protein];	C05744	Acetoacetyl-[acp];	2.3.1.-	<Transferases; Acyltransferases; Transferring groups other than amino-acyl groups>	map00061	Fatty acid biosynthesis	bbr	ssp	mxa	lil	hpa	lin	eco	son		bba	bpa	bbr	gka	lpf	ngo	sme	cte	cli	tdn	aae	hth	nam
		x	C04246	But-2-enoyl-[acyl-carrier protein]	C04618	(3R)-3-Hydroxybutanoyl-[acyl-carrier protein];	2.3.1.-	<Transferases; Acyltransferases; Transferring groups other than amino-acyl groups>	map00061	Fatty acid biosynthesis	bbr	ssp	mxa	lil	hpa	lin	eco	son		bba	bpa	bbr	gka	lpf	ngo	sme	cte	cli	tdn	aae	hth	nam
		x	C04246	But-2-enoyl-[acyl-carrier protein]	C05745	Butyryl-[acp];	2.3.1.-	<Transferases; Acyltransferases; Transferring groups other than amino-acyl groups>	map00061	Fatty acid biosynthesis	bbr	ssp	mxa	lil	hpa	lin	eco	son		bba	bpa	bbr	gka	lpf	ngo	sme	cte	cli	tdn	aae	hth	nam
		x	C00131	dATP;	C00206	dADP;	2.7.4.6	nucleoside-diphosphate kinase;	map00230	Purine metabolism	bbr	ssp	mxa	lil	hpa	lin	eco	son	ama	bba	bpa	bbr	gka	lpf	ngo	sme	cte	cli	tdn	aae	hth	nam
		x	C00352	D-Glucosamine 6-phosphate;	C05345	beta-D-Fructose 6-phosphate	3.5.1.-	<Hydrolases; Acting on carbon-nitrogen bonds, other than peptide bonds; In linear amides>	map00520	Amino sugar and nucleotide sugar metabolism	bbr	ssp	mxa	lil	hpa	lin	eco	son		bba	bpa	bbr	gka	lpf	ngo	sme	cte	cli	tdn	aae	hth	nam
		x	C05745	Butyryl-[acp];	C05746	3-Oxohexanoyl-[acp];	2.3.1.179	beta-ketoacyl-acyl-carrier-protein synthase II;	map00061	Fatty acid biosynthesis	bbr	ssp	mxa	lil	hpa	lin	eco	son	ama	bba	bpa	bbr	gka	lpf	ngo	sme	cte	cli	tdn	aae	hth	nam
		x	C00944	3-Dehydroquinate;	C02637	3-Dehydroshikimate	4.2.1.10	3-dehydroquinate dehydratase;	map00400	Phenylalanine, tyrosine and tryptophan biosynthesis	bbr	ssp	mxa	lil	hpa	lin	eco	son			bpa	bbr	gka	lpf	ngo	sme	cte	cli	tdn	aae	hth	nam
		x	C05752	Octanoyl-[acp];	C05753	3-Oxodecanoyl-[acp];	2.3.1.-	<Transferases; Acyltransferases; Transferring groups other than amino-acyl groups>	map00061	Fatty acid biosynthesis	bbr	ssp	mxa	lil	hpa	lin	eco	son		bba	bpa	bbr	gka	lpf	ngo	sme	cte	cli	tdn	aae	hth	nam
		x	C00144	GMP;	C00655	Xanthosine 5'-phosphate;	6.3.5.2	GMP synthase (glutamine-hydrolysing);	map00230	Purine metabolism	bbr	ssp	mxa	lil	hpa	lin	eco	son	ama	bba	bpa	bbr	gka	lpf	ngo	sme	cte	cli	tdn	aae	hth	nam
		x	C00130	IMP;	C00655	Xanthosine 5'-phosphate;	1.1.1.205	IMP dehydrogenase;	map00230	Purine metabolism	bbr	ssp	mxa	lil	hpa	lin	eco	son	ama	bba	bpa	bbr	gka	lpf	ngo	sme	cte	cli	tdn	aae	hth	nam
		x	C00130	IMP;	C04734	1-(5'-Phosphoribosyl)-5-formamido-4-imidazolecarboxamide;	3.5.4.10	IMP cyclohydrolase;	map00230	Purine metabolism	bbr	ssp	mxa	lil		lin	eco	son	ama	bba	bpa	bbr	gka	lpf	ngo	sme	cte	cli	tdn	aae	hth	nam
		x	C04677	1-(5'-Phosphoribosyl)-5-amino-4-imidazolecarboxamide;	C04734	1-(5'-Phosphoribosyl)-5-formamido-4-imidazolecarboxamide;	6.3.4.-	<Ligases; Forming carbon-nitrogen bonds; Other carbon--nitrogen ligases>	map00230	Purine metabolism	bbr	ssp	mxa	lil	hpa	lin	eco	son	ama	bba	bpa	bbr	gka	lpf	ngo	sme	cte	cli	tdn	aae	hth	nam
		x	C04677	1-(5'-Phosphoribosyl)-5-amino-4-imidazolecarboxamide;	C04823	1-(5'-Phosphoribosyl)-5-amino-4-(N-succinocarboxamide)-imidazole;	4.3.2.2	adenylosuccinate lyase;	map00230	Purine metabolism	bbr	ssp	mxa	lil	hpa	lin	eco	son	ama	bba	bpa	bbr	gka	lpf	ngo	sme	cte	cli	tdn	aae	hth	nam
		x	C04751	1-(5-Phospho-D-ribosyl)-5-amino-4-imidazolecarboxylate;	C04823	1-(5'-Phosphoribosyl)-5-amino-4-(N-succinocarboxamide)-imidazole;	6.3.2.6	phosphoribosylaminoimidazolesuccinocarboxamide synthase;	map00230	Purine metabolism	bbr	ssp	mxa	lil		lin	eco	son	ama	bba	bpa	bbr	gka	lpf	ngo	sme	cte	cli	tdn	aae	hth	nam
		x	C04751	1-(5-Phospho-D-ribosyl)-5-amino-4-imidazolecarboxylate;	C15667	5-Carboxyamino-1-(5-phospho-D-ribosyl)imidazole	5.4.99.18	5-(carboxyamino)imidazole ribonucleotide mutase;	map00230	Purine metabolism	bbr	ssp	mxa	lil		lin	eco	son	ama	bba	bpa	bbr	gka	lpf	ngo	sme	cte	cli	tdn	aae	hth	nam
		x	C03373	Aminoimidazole ribotide;	C15667	5-Carboxyamino-1-(5-phospho-D-ribosyl)imidazole	6.3.4.18	5-(carboxyamino)imidazole ribonucleotide synthase;	map00230	Purine metabolism	bbr	ssp	mxa	lil		lin	eco	son	ama		bpa	bbr	gka	lpf	ngo	sme				aae	hth
		x	C03373	Aminoimidazole ribotide;	C04640	2-(Formamido)-N1-(5'-phosphoribosyl)acetamidine;	6.3.3.1	phosphoribosylformylglycinamidine cyclo-ligase;	map00230	Purine metabolism	bbr	ssp	mxa	lil		lin	eco	son	ama	bba	bpa	bbr	gka	lpf	ngo	sme	cte	cli	tdn	aae	hth	nam
		x	C00130	IMP;	C04734	1-(5'-Phosphoribosyl)-5-formamido-4-imidazolecarboxamide;	2.1.2.3	phosphoribosylaminoimidazolecarboxamide formyltransferase;	map00230	Purine metabolism	bbr	ssp	mxa	lil		lin	eco	son	ama	bba	bpa	bbr	gka	lpf	ngo	sme	cte	cli	tdn	aae	hth	nam
		x	C04376	5'-Phosphoribosyl-N-formylglycinamide;	C04640	2-(Formamido)-N1-(5'-phosphoribosyl)acetamidine;	6.3.5.3	phosphoribosylformylglycinamidine synthase;	map00230	Purine metabolism	bbr	ssp	mxa	lil		lin	eco	son	ama	bba	bpa	bbr	gka	lpf	ngo	sme	cte	cli	tdn	aae	hth	nam
		x	C00130	IMP;	C03794	N6-(1,2-Dicarboxyethyl)-AMP;	6.3.4.4	adenylosuccinate synthase;	map00230	Purine metabolism	bbr	ssp	mxa	lil	hpa	lin	eco	son	ama	bba	bpa	bbr	gka	lpf	ngo	sme	cte	cli	tdn	aae	hth	nam
		x	C00020	AMP;	C03794	N6-(1,2-Dicarboxyethyl)-AMP;	4.3.2.2	adenylosuccinate lyase;	map00230	Purine metabolism	bbr	ssp	mxa	lil	hpa	lin	eco	son	ama	bba	bpa	bbr	gka	lpf	ngo	sme	cte	cli	tdn	aae	hth	nam
		x	C00020	AMP;	C00147	Adenine;	2.4.2.7	adenine phosphoribosyltransferase;	map00230	Purine metabolism	bbr	ssp	mxa	lil	hpa	lin	eco	son		bba	bpa	bbr	gka		ngo	sme	cte	cli	tdn			nam
		x	C04677	1-(5'-Phosphoribosyl)-5-amino-4-imidazolecarboxamide;	C04734	1-(5'-Phosphoribosyl)-5-formamido-4-imidazolecarboxamide;	2.1.2.3	phosphoribosylaminoimidazolecarboxamide formyltransferase;	map00230	Purine metabolism	bbr	ssp	mxa	lil		lin	eco	son	ama	bba	bpa	bbr	gka	lpf	ngo	sme	cte	cli	tdn	aae	hth	nam
		x	C00046	RNA;	C00075	UTP;	2.7.7.6	DNA-directed RNA polymerase;	map00240	Pyrimidine metabolism	bbr	ssp	mxa	lil	hpa	lin	eco	son	ama	bba	bpa	bbr	gka	lpf	ngo	sme	cte	cli	tdn	aae	hth	nam
		x	C05345	beta-D-Fructose 6-phosphate	C05382	Sedoheptulose 7-phosphate;	2.2.1.2	transaldolase;	map00030	Pentose phosphate pathway	bbr	ssp	mxa	lil	hpa	lin	eco	son	ama	bba	bpa	bbr	gka		ngo	sme	cte	cli	tdn	aae	hth	nam
		x	C00279	D-Erythrose 4-phosphate	C05345	beta-D-Fructose 6-phosphate	2.2.1.1	transketolase;	map00030	Pentose phosphate pathway	bbr	ssp	mxa	lil	hpa	lin	eco	son	ama	bba	bpa	bbr	gka	lpf	ngo	sme	cte	cli	tdn	aae	hth	nam
		x	C05223	Dodecanoyl-[acyl-carrier protein];	C05758	trans-Dodec-2-enoyl-[acp];	2.3.1.-	<Transferases; Acyltransferases; Transferring groups other than amino-acyl groups>	map00061	Fatty acid biosynthesis	bbr	ssp	mxa	lil	hpa	lin	eco	son		bba	bpa	bbr	gka	lpf	ngo	sme	cte	cli	tdn	aae	hth	nam
		x	C00074	Phosphoenolpyruvate;	C00631	2-Phospho-D-glycerate;	4.2.1.11	phosphopyruvate hydratase;	map00010	Glycolysis / Gluconeogenesis	bbr	ssp	mxa	lil	hpa	lin	eco	son	ama	bba	bpa	bbr	gka	lpf	ngo	sme	cte	cli	tdn	aae	hth	nam
		x	C00002	ATP;	C00008	ADP;	2.7.4.6	nucleoside-diphosphate kinase;	map00230	Purine metabolism	bbr	ssp	mxa	lil	hpa	lin	eco	son	ama	bba	bpa	bbr	gka	lpf	ngo	sme	cte	cli	tdn	aae	hth	nam
		x	C00002	ATP;	C00008	ADP;	2.7.1.40	pyruvate kinase;	map00230	Purine metabolism	bbr	ssp	mxa	lil		lin	eco	son		bba	bpa	bbr	gka	lpf	ngo	sme						nam
		x	C00311	Isocitrate;	C00417	cis-Aconitate;	4.2.1.3	aconitate hydratase;	map00020; map00630; map00720	Citrate cycle (TCA cycle); Glyoxylate and dicarboxylate metabolism; Reductive carboxylate cycle (CO2 fixation)	bbr	ssp	mxa	lil	hpa	lin	eco	son	ama	bba	bpa	bbr	gka	lpf	ngo	sme	cte	cli	tdn	aae	hth	nam
		x	C00117	D-Ribose 5-phosphate;	C05382	Sedoheptulose 7-phosphate;	2.2.1.1	transketolase;	map00030; map00710	Pentose phosphate pathway; Carbon fixation in photosynthetic organisms	bbr	ssp	mxa	lil	hpa	lin	eco	son	ama	bba	bpa	bbr	gka	lpf	ngo	sme	cte	cli	tdn	aae	hth	nam
		x	C00111	Glycerone phosphate;	C00118	D-Glyceraldehyde 3-phosphate;	5.3.1.1	triose-phosphate isomerase;	map00010; map00051; map00562; map00710	Glycolysis / Gluconeogenesis; Fructose and mannose metabolism; Inositol phosphate metabolism; Carbon fixation in photosynthetic organisms	bbr	ssp	mxa	lil	hpa	lin	eco	son	ama	bba	bpa	bbr	gka	lpf	ngo	sme	cte	cli	tdn	aae	hth	nam
		x	C05761	Tetradecanoyl-[acp];	C05762	3-Oxohexadecanoyl-[acp];	2.3.1.-	<Transferases; Acyltransferases; Transferring groups other than amino-acyl groups>	map00061	Fatty acid biosynthesis	bbr	ssp	mxa	lil	hpa	lin	eco	son		bba	bpa	bbr	gka	lpf	ngo	sme	cte	cli	tdn	aae	hth	nam
		x	C00008	ADP;	C00020	AMP;	2.7.4.3	adenylate kinase;	map00230	Purine metabolism	bbr	ssp	mxa	lil	hpa	lin	eco	son	ama	bba	bpa	bbr	gka	lpf	ngo	sme	cte	cli	tdn	aae	hth	nam
		x	C00111	Glycerone phosphate;	C05378	beta-D-Fructose 1,6-bisphosphate	4.1.2.13	fructose-bisphosphate aldolase;	map00010; map00051	Glycolysis / Gluconeogenesis; Fructose and mannose metabolism	bbr	ssp	mxa	lil	hpa	lin	eco	son	ama	bba	bpa	bbr	gka	lpf	ngo	sme	cte	cli	tdn	aae	hth	nam
		x	C04619	(3R)-3-Hydroxydecanoyl-[acyl-carrier protein];	C05753	3-Oxodecanoyl-[acp];	2.3.1.-	<Transferases; Acyltransferases; Transferring groups other than amino-acyl groups>	map00061	Fatty acid biosynthesis	bbr	ssp	mxa	lil	hpa	lin	eco	son		bba	bpa	bbr	gka	lpf	ngo	sme	cte	cli	tdn	aae	hth	nam
		x	C00112	CDP;	C00705	dCDP;	1.17.4.1	ribonucleoside-diphosphate reductase;	map00240	Pyrimidine metabolism	bbr	ssp	mxa	lil	hpa	lin	eco	son	ama	bba	bpa	bbr	gka	lpf	ngo	sme	cte	cli	tdn	aae	hth	nam
		x	C00352	D-Glucosamine 6-phosphate;	C05345	beta-D-Fructose 6-phosphate	2.6.1.16	glutamine---fructose-6-phosphate transaminase (isomerizing);	map00520	Amino sugar and nucleotide sugar metabolism	bbr	ssp	mxa	lil	hpa	lin	eco	son	ama	bba	bpa	bbr	gka	lpf	ngo	sme	cte	cli	tdn	aae	hth	nam
		x	C04620	(3R)-3-Hydroxyoctanoyl-[acyl-carrier protein];	C05750	3-Oxooctanoyl-[acp];	1.1.1.100	3-oxoacyl-[acyl-carrier-protein] reductase;	map00061	Fatty acid biosynthesis	bbr	ssp	mxa	lil	hpa	lin	eco	son	ama	bba	bpa	bbr	gka	lpf	ngo	sme	cte	cli	tdn	aae	hth	nam
		x	C05223	Dodecanoyl-[acyl-carrier protein];	C05759	3-Oxotetradecanoyl-[acp];	2.3.1.-	<Transferases; Acyltransferases; Transferring groups other than amino-acyl groups>	map00061	Fatty acid biosynthesis	bbr	ssp	mxa	lil	hpa	lin	eco	son		bba	bpa	bbr	gka	lpf	ngo	sme	cte	cli	tdn	aae	hth	nam
		x	C00117	D-Ribose 5-phosphate;	C00199	D-Ribulose 5-phosphate	5.3.1.6	ribose-5-phosphate isomerase;	map00030; map00710	Pentose phosphate pathway; Carbon fixation in photosynthetic organisms	bbr	ssp	mxa	lil	hpa	lin	eco	son	ama	bba	bpa	bbr	gka	lpf	ngo	sme	cte	cli	tdn	aae	hth	nam
		x	C00295	Orotate;	C01103	Orotidine 5'-phosphate;	2.4.2.10	orotate phosphoribosyltransferase;	map00240	Pyrimidine metabolism	bbr	ssp	mxa	lil	hpa	lin	eco	son	ama	bba	bpa	bbr	gka	lpf	ngo	sme	cte	cli	tdn	aae	hth	nam
		x	C00295	Orotate;	C00337	(S)-Dihydroorotate;	1.3.3.1	dihydroorotate oxidase;	map00240	Pyrimidine metabolism	bbr	ssp	mxa	lil	hpa	lin	eco	son	ama	bba	bpa	bbr	gka	lpf	ngo	sme	cte	cli	tdn	aae	hth	nam
		x	C00337	(S)-Dihydroorotate;	C00438	N-Carbamoyl-L-aspartate	3.5.2.3	dihydroorotase;	map00240	Pyrimidine metabolism	bbr	ssp	mxa	lil	hpa	lin	eco	son	ama	bba	bpa	bbr	gka	lpf	ngo	sme	cte	cli	tdn	aae	hth	nam
		x	C00169	Carbamoyl phosphate	C00438	N-Carbamoyl-L-aspartate	2.1.3.2	aspartate carbamoyltransferase;	map00240; map00250	Pyrimidine metabolism; Alanine, aspartate and glutamate metabolism	bbr	ssp	mxa	lil	hpa	lin	eco	son	ama	bba	bpa	bbr	gka	lpf	ngo	sme	cte	cli	tdn	aae	hth	nam
		x	C00064	L-Glutamine;	C00169	Carbamoyl phosphate	6.3.5.5	carbamoyl-phosphate synthase (glutamine-hydrolysing);	map00240; map00250	Pyrimidine metabolism; Alanine, aspartate and glutamate metabolism	bbr	ssp	mxa	lil	hpa	lin	eco	son	ama	bba	bpa	bbr	gka	lpf	ngo	sme	cte	cli	tdn	aae	hth	nam
		x	C00025	L-Glutamate;	C00064	L-Glutamine;	6.3.1.2	glutamate---ammonia ligase;	map00250; map00330; map00910	Alanine, aspartate and glutamate metabolism; Arginine and proline metabolism; Nitrogen metabolism	bbr	ssp	mxa	lil	hpa	lin	eco	son	ama	bba	bpa	bbr	gka	lpf	ngo	sme	cte	cli	tdn	aae	hth	nam
		x	C05763	trans-Hexadec-2-enoyl-[acp];	C05764	Hexadecanoyl-[acp];	2.3.1.-	<Transferases; Acyltransferases; Transferring groups other than amino-acyl groups>	map00061	Fatty acid biosynthesis	bbr	ssp	mxa	lil	hpa	lin	eco	son		bba	bpa	bbr	gka	lpf	ngo	sme	cte	cli	tdn	aae	hth	nam
		x	C00249	Hexadecanoic acid;	C05764	Hexadecanoyl-[acp];	2.3.1.-	<Transferases; Acyltransferases; Transferring groups other than amino-acyl groups>	map00061; map01040	Fatty acid biosynthesis; Biosynthesis of unsaturated fatty acids	bbr	ssp	mxa	lil	hpa	lin	eco	son		bba	bpa	bbr	gka	lpf	ngo	sme	cte	cli	tdn	aae	hth	nam
		x	C03838	5'-Phosphoribosylglycinamide;	C04376	5'-Phosphoribosyl-N-formylglycinamide;	2.1.2.2	phosphoribosylglycinamide formyltransferase;	map00230	Purine metabolism	bbr	ssp	mxa	lil		lin	eco	son	ama	bba	bpa	bbr	gka	lpf	ngo	sme	cte	cli	tdn	aae	hth	nam
		x	C05745	Butyryl-[acp];	C05746	3-Oxohexanoyl-[acp];	2.3.1.-	<Transferases; Acyltransferases; Transferring groups other than amino-acyl groups>	map00061	Fatty acid biosynthesis	bbr	ssp	mxa	lil	hpa	lin	eco	son		bba	bpa	bbr	gka	lpf	ngo	sme	cte	cli	tdn	aae	hth	nam
		x	C05761	Tetradecanoyl-[acp];	C05762	3-Oxohexadecanoyl-[acp];	2.3.1.179	beta-ketoacyl-acyl-carrier-protein synthase II;	map00061	Fatty acid biosynthesis	bbr	ssp	mxa	lil	hpa	lin	eco	son	ama	bba	bpa	bbr	gka	lpf	ngo	sme	cte	cli	tdn	aae	hth	nam
		x	C02739	1-(5-Phospho-D-ribosyl)-ATP;	C02741	Phosphoribosyl-AMP;	3.6.1.31	phosphoribosyl-ATP diphosphatase;	map00340	Histidine metabolism	bbr	ssp	mxa	lil		lin	eco	son			bpa	bbr	gka	lpf	ngo	sme			tdn	aae	hth	nam
		x	C02741	Phosphoribosyl-AMP;	C04896	5-(5-Phospho-D-ribosylaminoformimino)-1-(5-phosphoribosyl)-	3.5.4.19	phosphoribosyl-AMP cyclohydrolase;	map00340	Histidine metabolism	bbr	ssp	mxa	lil		lin	eco	son			bpa	bbr	gka	lpf	ngo	sme	cte	cli	tdn	aae	hth	nam
		x	C04896	5-(5-Phospho-D-ribosylaminoformimino)-1-(5-phosphoribosyl)-	C04916	N-(5'-Phospho-D-1'-ribulosylformimino)-5-amino-1-(5''-phospho-D-	5.3.1.16	1-(5-phosphoribosyl)-5-[(5-	map00340	Histidine metabolism	bbr	ssp	mxa	lil		lin	eco	son			bpa	bbr	gka	lpf	ngo	sme	cte	cli	tdn	aae	hth	nam
		x	C04618	(3R)-3-Hydroxybutanoyl-[acyl-carrier protein];	C05744	Acetoacetyl-[acp];	1.1.1.100	3-oxoacyl-[acyl-carrier-protein] reductase;	map00061	Fatty acid biosynthesis	bbr	ssp	mxa	lil	hpa	lin	eco	son	ama	bba	bpa	bbr	gka	lpf	ngo	sme	cte	cli	tdn	aae	hth	nam
Subsystem 11	0.0028145229383619475										bbr		mxa	lil			eco	son	ama	bba	bpa	bbr		lpf	ngo	sme
		i	C15972	Enzyme N6-(lipoyl)lysine;	C16254	[Dihydrolipoyllysine-residue succinyltransferase]	1.2.4.2	oxoglutarate dehydrogenase (succinyl-transferring);	map00020	Citrate cycle (TCA cycle)	bbr	ssp	mxa	lil			eco	son	ama	bba	bpa	bbr	gka	lpf	ngo	sme		cli
		s	C05752	Octanoyl-[acp];	C16236	Protein N6-(octanoyl)lysine	2.3.1.181	lipoyl(octanoyl) transferase;	map00785	Lipoic acid metabolism	bbr		mxa	lil			eco	son	ama	bba	bpa	bbr		lpf	ngo	sme						nam
		x	C00091	Succinyl-CoA;	C16254	[Dihydrolipoyllysine-residue succinyltransferase]	2.3.1.61	dihydrolipoyllysine-residue succinyltransferase;	map00020	Citrate cycle (TCA cycle)	bbr	ssp	mxa	lil			eco	son	ama	bba	bpa	bbr	gka	lpf	ngo	sme		cli
		x	C15972	Enzyme N6-(lipoyl)lysine;	C15973	Enzyme N6-(dihydrolipoyl)lysine;	1.8.1.4	dihydrolipoyl dehydrogenase;	map00010; map00020; map00280; map00620	Glycolysis / Gluconeogenesis; Citrate cycle (TCA cycle); Valine, leucine and isoleucine degradation; Pyruvate metabolism	bbr	ssp	mxa	lil		lin	eco	son	ama	bba	bpa	bbr	gka	lpf	ngo	sme	cte	cli		aae	hth	nam
		x	C15973	Enzyme N6-(dihydrolipoyl)lysine;	C16254	[Dihydrolipoyllysine-residue succinyltransferase]	2.3.1.61	dihydrolipoyllysine-residue succinyltransferase;	map00020	Citrate cycle (TCA cycle)	bbr	ssp	mxa	lil			eco	son	ama	bba	bpa	bbr	gka	lpf	ngo	sme		cli
		x	C05752	Octanoyl-[acp];	C05753	3-Oxodecanoyl-[acp];	2.3.1.179	beta-ketoacyl-acyl-carrier-protein synthase II;	map00061	Fatty acid biosynthesis	bbr	ssp	mxa	lil	hpa	lin	eco	son	ama	bba	bpa	bbr	gka	lpf	ngo	sme	cte	cli	tdn	aae	hth	nam
		x	C00026	2-Oxoglutarate;	C16254	[Dihydrolipoyllysine-residue succinyltransferase]	1.2.4.2	oxoglutarate dehydrogenase (succinyl-transferring);	map00020	Citrate cycle (TCA cycle)	bbr	ssp	mxa	lil			eco	son	ama	bba	bpa	bbr	gka	lpf	ngo	sme		cli
		x	C00026	2-Oxoglutarate;	C00311	Isocitrate;	1.1.1.42	isocitrate dehydrogenase (NADP+);	map00020; map00720	Citrate cycle (TCA cycle); Reductive carboxylate cycle (CO2 fixation)	bbr	ssp	mxa	lil	hpa	lin	eco	son	ama	bba	bpa	bbr		lpf	ngo	sme	cte	cli	tdn	aae	hth	nam
		x	C00311	Isocitrate;	C05379	Oxalosuccinate;	1.1.1.42	isocitrate dehydrogenase (NADP+);	map00020	Citrate cycle (TCA cycle)	bbr	ssp	mxa	lil	hpa	lin	eco	son	ama	bba	bpa	bbr		lpf	ngo	sme	cte	cli	tdn	aae	hth	nam
		x	C00026	2-Oxoglutarate;	C05379	Oxalosuccinate;	1.1.1.42	isocitrate dehydrogenase (NADP+);	map00020	Citrate cycle (TCA cycle)	bbr	ssp	mxa	lil	hpa	lin	eco	son	ama	bba	bpa	bbr		lpf	ngo	sme	cte	cli	tdn	aae	hth	nam
		x	C00311	Isocitrate;	C00417	cis-Aconitate;	4.2.1.3	aconitate hydratase;	map00020; map00630; map00720	Citrate cycle (TCA cycle); Glyoxylate and dicarboxylate metabolism; Reductive carboxylate cycle (CO2 fixation)	bbr	ssp	mxa	lil	hpa	lin	eco	son	ama	bba	bpa	bbr	gka	lpf	ngo	sme	cte	cli	tdn	aae	hth	nam
		x	C00158	Citrate;	C00417	cis-Aconitate;	4.2.1.3	aconitate hydratase;	map00020; map00630; map00720	Citrate cycle (TCA cycle); Glyoxylate and dicarboxylate metabolism; Reductive carboxylate cycle (CO2 fixation)	bbr	ssp	mxa	lil	hpa	lin	eco	son	ama	bba	bpa	bbr	gka	lpf	ngo	sme	cte	cli	tdn	aae	hth	nam
		x	C00024	Acetyl-CoA;	C00158	Citrate;	2.3.3.1	citrate (Si)-synthase;	map00020; map00630	Citrate cycle (TCA cycle); Glyoxylate and dicarboxylate metabolism	bbr	ssp	mxa	lil	hpa	lin	eco	son	ama	bba	bpa	bbr	gka	lpf	ngo	sme	cte	cli	tdn	aae	hth
		x	C00022	Pyruvate;	C00024	Acetyl-CoA;	1.8.1.4	dihydrolipoyl dehydrogenase;	map00010; map00020; map00620	Glycolysis / Gluconeogenesis; Citrate cycle (TCA cycle); Pyruvate metabolism	bbr	ssp	mxa	lil		lin	eco	son	ama	bba	bpa	bbr	gka	lpf	ngo	sme	cte	cli		aae	hth	nam
		x	C00024	Acetyl-CoA;	C03939	Acetyl-[acyl-carrier protein]	2.3.1.180	beta-ketoacyl-acyl-carrier-protein synthase III;	map00061	Fatty acid biosynthesis	bbr	ssp	mxa	lil	hpa	lin	eco	son	ama	bba	bpa	bbr	gka	lpf	ngo	sme	cte	cli	tdn	aae	hth	nam
		x	C01209	Malonyl-[acyl-carrier protein]	C05753	3-Oxodecanoyl-[acp];	2.3.1.179	beta-ketoacyl-acyl-carrier-protein synthase II;	map00061	Fatty acid biosynthesis	bbr	ssp	mxa	lil	hpa	lin	eco	son	ama	bba	bpa	bbr	gka	lpf	ngo	sme	cte	cli	tdn	aae	hth	nam
		x	C01209	Malonyl-[acyl-carrier protein]	C05759	3-Oxotetradecanoyl-[acp];	2.3.1.179	beta-ketoacyl-acyl-carrier-protein synthase II;	map00061	Fatty acid biosynthesis	bbr	ssp	mxa	lil	hpa	lin	eco	son	ama	bba	bpa	bbr	gka	lpf	ngo	sme	cte	cli	tdn	aae	hth	nam
		x	C05223	Dodecanoyl-[acyl-carrier protein];	C05759	3-Oxotetradecanoyl-[acp];	2.3.1.179	beta-ketoacyl-acyl-carrier-protein synthase II;	map00061	Fatty acid biosynthesis	bbr	ssp	mxa	lil	hpa	lin	eco	son	ama	bba	bpa	bbr	gka	lpf	ngo	sme	cte	cli	tdn	aae	hth	nam
		x	C03939	Acetyl-[acyl-carrier protein]	C05744	Acetoacetyl-[acp];	2.3.1.180	beta-ketoacyl-acyl-carrier-protein synthase III;	map00061	Fatty acid biosynthesis	bbr	ssp	mxa	lil	hpa	lin	eco	son	ama	bba	bpa	bbr	gka	lpf	ngo	sme	cte	cli	tdn	aae	hth	nam
		x	C03939	Acetyl-[acyl-carrier protein]	C05744	Acetoacetyl-[acp];	2.3.1.179	beta-ketoacyl-acyl-carrier-protein synthase II;	map00061	Fatty acid biosynthesis	bbr	ssp	mxa	lil	hpa	lin	eco	son	ama	bba	bpa	bbr	gka	lpf	ngo	sme	cte	cli	tdn	aae	hth	nam
		x	C01209	Malonyl-[acyl-carrier protein]	C05756	3-Oxododecanoyl-[acp];	2.3.1.179	beta-ketoacyl-acyl-carrier-protein synthase II;	map00061	Fatty acid biosynthesis	bbr	ssp	mxa	lil	hpa	lin	eco	son	ama	bba	bpa	bbr	gka	lpf	ngo	sme	cte	cli	tdn	aae	hth	nam
		x	C05755	Decanoyl-[acp];	C05756	3-Oxododecanoyl-[acp];	2.3.1.179	beta-ketoacyl-acyl-carrier-protein synthase II;	map00061	Fatty acid biosynthesis	bbr	ssp	mxa	lil	hpa	lin	eco	son	ama	bba	bpa	bbr	gka	lpf	ngo	sme	cte	cli	tdn	aae	hth	nam
		x	C00022	Pyruvate;	C00024	Acetyl-CoA;	2.3.1.12	dihydrolipoyllysine-residue acetyltransferase;	map00010; map00020; map00620	Glycolysis / Gluconeogenesis; Citrate cycle (TCA cycle); Pyruvate metabolism	bbr	ssp	mxa	lil		lin	eco	son	ama	bba	bpa	bbr	gka	lpf	ngo	sme					hth	nam
		x	C01209	Malonyl-[acyl-carrier protein]	C05746	3-Oxohexanoyl-[acp];	2.3.1.179	beta-ketoacyl-acyl-carrier-protein synthase II;	map00061	Fatty acid biosynthesis	bbr	ssp	mxa	lil	hpa	lin	eco	son	ama	bba	bpa	bbr	gka	lpf	ngo	sme	cte	cli	tdn	aae	hth	nam
		x	C05746	3-Oxohexanoyl-[acp];	C05747	(R)-3-Hydroxyhexanoyl-[acp];	1.1.1.100	3-oxoacyl-[acyl-carrier-protein] reductase;	map00061	Fatty acid biosynthesis	bbr	ssp	mxa	lil	hpa	lin	eco	son	ama	bba	bpa	bbr	gka	lpf	ngo	sme	cte	cli	tdn	aae	hth	nam
		x	C00022	Pyruvate;	C05125	2-(alpha-Hydroxyethyl)thiamine diphosphate;	1.2.4.1	pyruvate dehydrogenase (acetyl-transferring);	map00010; map00020; map00290; map00620; map00650	Glycolysis / Gluconeogenesis; Citrate cycle (TCA cycle); Valine, leucine and isoleucine biosynthesis; Pyruvate metabolism; Butanoate metabolism	bbr	ssp	mxa	lil		lin	eco	son	ama	bba	bpa	bbr	gka	lpf	ngo	sme					hth	nam
		x	C01209	Malonyl-[acyl-carrier protein]	C05744	Acetoacetyl-[acp];	2.3.1.179	beta-ketoacyl-acyl-carrier-protein synthase II;	map00061	Fatty acid biosynthesis	bbr	ssp	mxa	lil	hpa	lin	eco	son	ama	bba	bpa	bbr	gka	lpf	ngo	sme	cte	cli	tdn	aae	hth	nam
		x	C00042	Succinate;	C00091	Succinyl-CoA;	6.2.1.5	succinate---CoA ligase (ADP-forming);	map00020; map00640; map00720	Citrate cycle (TCA cycle); Propanoate metabolism; Reductive carboxylate cycle (CO2 fixation)	bbr	ssp	mxa	lil			eco	son	ama	bba	bpa	bbr	gka	lpf	ngo	sme	cte	cli	tdn	aae	hth	nam
		x	C01209	Malonyl-[acyl-carrier protein]	C05750	3-Oxooctanoyl-[acp];	2.3.1.179	beta-ketoacyl-acyl-carrier-protein synthase II;	map00061	Fatty acid biosynthesis	bbr	ssp	mxa	lil	hpa	lin	eco	son	ama	bba	bpa	bbr	gka	lpf	ngo	sme	cte	cli	tdn	aae	hth	nam
		x	C05749	Hexanoyl-[acp];	C05750	3-Oxooctanoyl-[acp];	2.3.1.179	beta-ketoacyl-acyl-carrier-protein synthase II;	map00061	Fatty acid biosynthesis	bbr	ssp	mxa	lil	hpa	lin	eco	son	ama	bba	bpa	bbr	gka	lpf	ngo	sme	cte	cli	tdn	aae	hth	nam
		x	C00042	Succinate;	C00122	Fumarate;	1.3.99.1	succinate dehydrogenase;	map00020; map00190; map00632; map00650; map00720	Citrate cycle (TCA cycle); Oxidative phosphorylation; Benzoate degradation via CoA ligation; Butanoate metabolism; Reductive carboxylate cycle (CO2 fixation)	bbr	ssp	mxa	lil	hpa	lin	eco	son	ama	bba	bpa	bbr	gka	lpf	ngo	sme	cte	cli	tdn	aae	hth	nam
		x	C00122	Fumarate;	C00149	(S)-Malate;	4.2.1.2	fumarate hydratase;	map00020; map00720	Citrate cycle (TCA cycle); Reductive carboxylate cycle (CO2 fixation)	bbr	ssp	mxa	lil	hpa	lin	eco	son	ama	bba	bpa	bbr	gka	lpf	ngo	sme	cte	cli	tdn	aae	hth	nam
		x	C00036	Oxaloacetate;	C00158	Citrate;	2.3.3.1	citrate (Si)-synthase;	map00020; map00630	Citrate cycle (TCA cycle); Glyoxylate and dicarboxylate metabolism	bbr	ssp	mxa	lil	hpa	lin	eco	son	ama	bba	bpa	bbr	gka	lpf	ngo	sme	cte	cli	tdn	aae	hth
		x	C01209	Malonyl-[acyl-carrier protein]	C05744	Acetoacetyl-[acp];	2.3.1.180	beta-ketoacyl-acyl-carrier-protein synthase III;	map00061	Fatty acid biosynthesis	bbr	ssp	mxa	lil	hpa	lin	eco	son	ama	bba	bpa	bbr	gka	lpf	ngo	sme	cte	cli	tdn	aae	hth	nam
		x	C00022	Pyruvate;	C00024	Acetyl-CoA;	1.2.4.1	pyruvate dehydrogenase (acetyl-transferring);	map00010; map00020; map00290; map00620; map00650	Glycolysis / Gluconeogenesis; Citrate cycle (TCA cycle); Valine, leucine and isoleucine biosynthesis; Pyruvate metabolism; Butanoate metabolism	bbr	ssp	mxa	lil		lin	eco	son	ama	bba	bpa	bbr	gka	lpf	ngo	sme					hth	nam
		x	C04619	(3R)-3-Hydroxydecanoyl-[acyl-carrier protein];	C05753	3-Oxodecanoyl-[acp];	1.1.1.100	3-oxoacyl-[acyl-carrier-protein] reductase;	map00061	Fatty acid biosynthesis	bbr	ssp	mxa	lil	hpa	lin	eco	son	ama	bba	bpa	bbr	gka	lpf	ngo	sme	cte	cli	tdn	aae	hth	nam
		x	C01209	Malonyl-[acyl-carrier protein]	C05762	3-Oxohexadecanoyl-[acp];	2.3.1.179	beta-ketoacyl-acyl-carrier-protein synthase II;	map00061	Fatty acid biosynthesis	bbr	ssp	mxa	lil	hpa	lin	eco	son	ama	bba	bpa	bbr	gka	lpf	ngo	sme	cte	cli	tdn	aae	hth	nam
		x	C04633	(3R)-3-Hydroxypalmitoyl-[acyl-carrier protein];	C05762	3-Oxohexadecanoyl-[acp];	1.1.1.100	3-oxoacyl-[acyl-carrier-protein] reductase;	map00061	Fatty acid biosynthesis	bbr	ssp	mxa	lil	hpa	lin	eco	son	ama	bba	bpa	bbr	gka	lpf	ngo	sme	cte	cli	tdn	aae	hth	nam
		x	C05756	3-Oxododecanoyl-[acp];	C05757	(R)-3-Hydroxydodecanoyl-[acp];	1.1.1.100	3-oxoacyl-[acyl-carrier-protein] reductase;	map00061	Fatty acid biosynthesis	bbr	ssp	mxa	lil	hpa	lin	eco	son	ama	bba	bpa	bbr	gka	lpf	ngo	sme	cte	cli	tdn	aae	hth	nam
		x	C05745	Butyryl-[acp];	C05746	3-Oxohexanoyl-[acp];	2.3.1.179	beta-ketoacyl-acyl-carrier-protein synthase II;	map00061	Fatty acid biosynthesis	bbr	ssp	mxa	lil	hpa	lin	eco	son	ama	bba	bpa	bbr	gka	lpf	ngo	sme	cte	cli	tdn	aae	hth	nam
		x	C04620	(3R)-3-Hydroxyoctanoyl-[acyl-carrier protein];	C05750	3-Oxooctanoyl-[acp];	1.1.1.100	3-oxoacyl-[acyl-carrier-protein] reductase;	map00061	Fatty acid biosynthesis	bbr	ssp	mxa	lil	hpa	lin	eco	son	ama	bba	bpa	bbr	gka	lpf	ngo	sme	cte	cli	tdn	aae	hth	nam
		x	C05761	Tetradecanoyl-[acp];	C05762	3-Oxohexadecanoyl-[acp];	2.3.1.179	beta-ketoacyl-acyl-carrier-protein synthase II;	map00061	Fatty acid biosynthesis	bbr	ssp	mxa	lil	hpa	lin	eco	son	ama	bba	bpa	bbr	gka	lpf	ngo	sme	cte	cli	tdn	aae	hth	nam
		x	C04618	(3R)-3-Hydroxybutanoyl-[acyl-carrier protein];	C05744	Acetoacetyl-[acp];	1.1.1.100	3-oxoacyl-[acyl-carrier-protein] reductase;	map00061	Fatty acid biosynthesis	bbr	ssp	mxa	lil	hpa	lin	eco	son	ama	bba	bpa	bbr	gka	lpf	ngo	sme	cte	cli	tdn	aae	hth	nam
Subsystem 12	0.0028145229383619475										bbr	ssp	mxa	lil			eco	son		bba	bpa	bbr	gka	lpf		sme
		i	C05266	(S)-Hydroxyoctanoyl-CoA;	C05276	trans-Oct-2-enoyl-CoA;	4.2.1.17	enoyl-CoA hydratase;	map00062; map00071	Fatty acid elongation in mitochondria; Fatty acid metabolism	bbr	ssp	mxa	lil			eco	son		bba	bpa	bbr	gka	lpf		sme
Subsystem 13	0.0028145229383619475										bbr	ssp	mxa	lil			eco	son		bba	bpa	bbr	gka	lpf		sme
		i	C16332	trans-2-Enoyl-OPC6-CoA	C16334	3-Oxo-OPC6-CoA	4.2.1.17	enoyl-CoA hydratase;	map00592	alpha-Linolenic acid metabolism	bbr	ssp	mxa	lil			eco	son		bba	bpa	bbr	gka	lpf		sme
Subsystem 14	0.0028145229383619475										bbr		mxa	lil	hpa		eco	son		bba	bpa	bbr		lpf	ngo	sme
		i	C16317	(+)-7-Isojasmonic acid	C16339	(+)-7-Isojasmonic acid CoA	3.1.2.-	<Hydrolases; Acting on ester bonds; Thiolester hydrolases>	map00592	alpha-Linolenic acid metabolism	bbr		mxa	lil	hpa		eco	son		bba	bpa	bbr		lpf	ngo	sme
Subsystem 15	0.0028145229383619475										bbr	ssp	mxa				eco	son		bba	bpa	bbr	gka	lpf	ngo	sme
		i	C02593	Tetradecanoyl-CoA;	C05273	trans-Tetradec-2-enoyl-CoA;	1.3.99.-	<Oxidoreductases; Acting on the CH-CH group of donors; With other acceptors>	map00071	Fatty acid metabolism	bbr	ssp	mxa				eco	son		bba	bpa	bbr	gka	lpf	ngo	sme
Subsystem 16	0.0028145229383619475										bbr		mxa	lil		lin	eco	son			bpa	bbr	gka	lpf	ngo	sme
		i	C06054	2-Oxo-3-hydroxy-4-phosphobutanoate;	C06055	O-Phospho-4-hydroxy-L-threonine;	2.6.1.52	phosphoserine transaminase;	map00750	Vitamin B6 metabolism	bbr		mxa	lil		lin	eco	son			bpa	bbr	gka	lpf	ngo	sme
Subsystem 17	0.0028145229383619475										bbr		mxa	lil			eco	son	ama	bba	bpa	bbr		lpf	ngo	sme
		i	C00250	Pyridoxal	C00314	Pyridoxine;	1.4.3.5	pyridoxal 5'-phosphate synthase;	map00750	Vitamin B6 metabolism	bbr		mxa	lil			eco	son	ama	bba	bpa	bbr		lpf	ngo	sme
		x	C00250	Pyridoxal	C00534	Pyridoxamine;	1.4.3.5	pyridoxal 5'-phosphate synthase;	map00750	Vitamin B6 metabolism	bbr		mxa	lil			eco	son	ama	bba	bpa	bbr		lpf	ngo	sme
Subsystem 18	0.0028145229383619475										bbr		mxa	lil			eco	son	ama	bba	bpa	bbr		lpf	ngo	sme
		i	C00018	Pyridoxal phosphate;	C00627	Pyridoxine phosphate;	1.4.3.5	pyridoxal 5'-phosphate synthase;	map00750	Vitamin B6 metabolism	bbr		mxa	lil			eco	son	ama	bba	bpa	bbr		lpf	ngo	sme
		x	C00627	Pyridoxine phosphate;	C11638	3-Amino-2-oxopropyl phosphate;	2.6.99.2	pyridoxine 5'-phosphate synthase;	map00750	Vitamin B6 metabolism	bbr		mxa	lil	hpa		eco	son	ama	bba	bpa	bbr		lpf	ngo	sme	cte	cli	tdn	aae	hth	nam
		x	C00627	Pyridoxine phosphate;	C11437	1-Deoxy-D-xylulose 5-phosphate	2.6.99.2	pyridoxine 5'-phosphate synthase;	map00750	Vitamin B6 metabolism	bbr		mxa	lil	hpa		eco	son	ama	bba	bpa	bbr		lpf	ngo	sme	cte	cli	tdn	aae	hth	nam
		x	C00018	Pyridoxal phosphate;	C00647	Pyridoxamine phosphate;	1.4.3.5	pyridoxal 5'-phosphate synthase;	map00750	Vitamin B6 metabolism	bbr		mxa	lil			eco	son	ama	bba	bpa	bbr		lpf	ngo	sme
Subsystem 19	0.0028145229383619475										bbr	ssp	mxa	lil			eco	son		bba	bpa	bbr	gka	lpf		sme
		i	C03460	2-Methylprop-2-enoyl-CoA;	C06000	(S)-3-Hydroxyisobutyryl-CoA	4.2.1.17	enoyl-CoA hydratase;	map00280	Valine, leucine and isoleucine degradation	bbr	ssp	mxa	lil			eco	son		bba	bpa	bbr	gka	lpf		sme
Subsystem 20	0.0028145229383619475										bbr	ssp	mxa	lil			eco	son		bba	bpa	bbr	gka	lpf		sme
		i	C05264	(S)-Hydroxydecanoyl-CoA;	C05275	trans-Dec-2-enoyl-CoA;	4.2.1.17	enoyl-CoA hydratase;	map00062; map00071	Fatty acid elongation in mitochondria; Fatty acid metabolism	bbr	ssp	mxa	lil			eco	son		bba	bpa	bbr	gka	lpf		sme
Subsystem 21	0.0028145229383619475										bbr	ssp	mxa	lil			eco	son		bba	bpa	bbr	gka	lpf		sme
		i	C16336	trans-2-Enoyl-OPC4-CoA	C16338	3-Oxo-OPC4-CoA	4.2.1.17	enoyl-CoA hydratase;	map00592	alpha-Linolenic acid metabolism	bbr	ssp	mxa	lil			eco	son		bba	bpa	bbr	gka	lpf		sme
Subsystem 22	0.0028145229383619475										bbr	ssp	mxa				eco	son		bba	bpa	bbr	gka	lpf	ngo	sme
		i	C01944	Octanoyl-CoA	C05276	trans-Oct-2-enoyl-CoA;	1.3.99.-	<Oxidoreductases; Acting on the CH-CH group of donors; With other acceptors>	map00071	Fatty acid metabolism	bbr	ssp	mxa				eco	son		bba	bpa	bbr	gka	lpf	ngo	sme
Subsystem 23	0.0028145229383619475										bbr	ssp	mxa				eco	son		bba	bpa	bbr	gka	lpf	ngo	sme
		i	C15785	Campest-4-en-3-one;	C15786	5alpha-Campestan-3-one;	1.3.99.-	<Oxidoreductases; Acting on the CH-CH group of donors; With other acceptors>	map00905	Brassinosteroid biosynthesis	bbr	ssp	mxa				eco	son		bba	bpa	bbr	gka	lpf	ngo	sme
Subsystem 24	0.0028145229383619475										bbr	ssp	mxa	lil			eco	son		bba	bpa	bbr	gka	lpf		sme
		i	C00894	Propenoyl-CoA;	C05668	3-Hydroxypropionyl-CoA;	4.2.1.17	enoyl-CoA hydratase;	map00410; map00640	beta-Alanine metabolism; Propanoate metabolism	bbr	ssp	mxa	lil			eco	son		bba	bpa	bbr	gka	lpf		sme
Subsystem 25	0.0028145229383619475										bbr	ssp	mxa	lil			eco	son		bba	bpa	bbr	gka	lpf		sme
		i	C14144	5-Carboxy-2-pentenoyl-CoA	C14145	(3S)-3-Hydroxyadipyl-CoA	4.2.1.17	enoyl-CoA hydratase;	map00930	Caprolactam degradation	bbr	ssp	mxa	lil			eco	son		bba	bpa	bbr	gka	lpf		sme
Subsystem 26	0.0028145229383619475										bbr	ssp	mxa	lil			eco	son		bba	bpa	bbr	gka	lpf		sme
		i	C05268	(S)-Hydroxyhexanoyl-CoA;	C05271	trans-Hex-2-enoyl-CoA;	4.2.1.17	enoyl-CoA hydratase;	map00062; map00071	Fatty acid elongation in mitochondria; Fatty acid metabolism	bbr	ssp	mxa	lil			eco	son		bba	bpa	bbr	gka	lpf		sme
Subsystem 27	0.0028145229383619475										bbr	ssp	mxa				eco	son		bba	bpa	bbr	gka	lpf	ngo	sme
		i	C01832	Lauroyl-CoA;	C03221	2-trans-Dodecenoyl-CoA;	1.3.99.-	<Oxidoreductases; Acting on the CH-CH group of donors; With other acceptors>	map00071	Fatty acid metabolism	bbr	ssp	mxa				eco	son		bba	bpa	bbr	gka	lpf	ngo	sme
Subsystem 28	0.0028145229383619475										bbr	ssp	mxa	lil			eco	son		bba	bpa	bbr	gka	lpf		sme
		i	C03345	2-Methylbut-2-enoyl-CoA;	C04405	(2S,3S)-3-Hydroxy-2-methylbutanoyl-CoA;	4.2.1.17	enoyl-CoA hydratase;	map00280	Valine, leucine and isoleucine degradation	bbr	ssp	mxa	lil			eco	son		bba	bpa	bbr	gka	lpf		sme
Subsystem 29	0.0028145229383619475										bbr	ssp	mxa				eco	son		bba	bpa	bbr	gka	lpf	ngo	sme
		i	C05270	Hexanoyl-CoA	C05271	trans-Hex-2-enoyl-CoA;	1.3.99.-	<Oxidoreductases; Acting on the CH-CH group of donors; With other acceptors>	map00071	Fatty acid metabolism	bbr	ssp	mxa				eco	son		bba	bpa	bbr	gka	lpf	ngo	sme
Subsystem 30	0.0028145229383619475										bbr	ssp	mxa				eco	son		bba	bpa	bbr	gka	lpf	ngo	sme
		i	C05274	Decanoyl-CoA	C05275	trans-Dec-2-enoyl-CoA;	1.3.99.-	<Oxidoreductases; Acting on the CH-CH group of donors; With other acceptors>	map00071	Fatty acid metabolism	bbr	ssp	mxa				eco	son		bba	bpa	bbr	gka	lpf	ngo	sme
Subsystem 31	0.0028145229383619475										bbr	ssp			hpa	lin	eco	son	ama		bpa	bbr	gka	lpf		sme
		i	C00155	L-Homocysteine;	C02291	L-Cystathionine	4.4.1.8	cystathionine beta-lyase;	map00270	Cysteine and methionine metabolism	bbr	ssp			hpa	lin	eco	son	ama		bpa	bbr	gka	lpf		sme
		x	C00065	L-Serine;	C02291	L-Cystathionine	4.4.1.8	cystathionine beta-lyase;	map00270	Cysteine and methionine metabolism	bbr	ssp			hpa	lin	eco	son	ama		bpa	bbr	gka	lpf		sme
		x	C00065	L-Serine;	C00143	5,10-Methylenetetrahydrofolate;	2.1.2.1	glycine hydroxymethyltransferase;	map00260; map00680	Glycine, serine and threonine metabolism; Methane metabolism	bbr	ssp	mxa	lil	hpa	lin	eco	son	ama	bba	bpa	bbr	gka	lpf	ngo	sme	cte	cli	tdn	aae	hth	nam
		x	C00037	Glycine;	C00065	L-Serine;	2.1.2.1	glycine hydroxymethyltransferase;	map00260; map00460; map00680	Glycine, serine and threonine metabolism; Cyanoamino acid metabolism; Methane metabolism	bbr	ssp	mxa	lil	hpa	lin	eco	son	ama	bba	bpa	bbr	gka	lpf	ngo	sme	cte	cli	tdn	aae	hth	nam
Subsystem 32	0.0028145229383619475										bbr	ssp	mxa	lil			eco	son		bba	bpa	bbr	gka	lpf		sme
		i	C00877	Crotonoyl-CoA;	C01144	(S)-3-Hydroxybutanoyl-CoA;	4.2.1.17	enoyl-CoA hydratase;	map00071; map00310; map00380; map00632; map00650	Fatty acid metabolism; Lysine degradation; Tryptophan metabolism; Benzoate degradation via CoA ligation; Butanoate metabolism	bbr	ssp	mxa	lil			eco	son		bba	bpa	bbr	gka	lpf		sme
Subsystem 33	0.0028145229383619475										bbr	ssp	mxa	lil			eco	son		bba	bpa	bbr	gka	lpf		sme
		i	C16328	trans-2-Enoyl-OPC8-CoA	C16330	3-Oxo-OPC8-CoA	4.2.1.17	enoyl-CoA hydratase;	map00592	alpha-Linolenic acid metabolism	bbr	ssp	mxa	lil			eco	son		bba	bpa	bbr	gka	lpf		sme
Subsystem 34	0.0028145229383619475										bbr	ssp	mxa	lil			eco	son		bba	bpa	bbr	gka	lpf		sme
		i	C03221	2-trans-Dodecenoyl-CoA;	C05262	(S)-3-Hydroxydodecanoyl-CoA	4.2.1.17	enoyl-CoA hydratase;	map00062; map00071	Fatty acid elongation in mitochondria; Fatty acid metabolism	bbr	ssp	mxa	lil			eco	son		bba	bpa	bbr	gka	lpf		sme
Subsystem 35	0.0028145229383619475										bbr	ssp	mxa				eco	son		bba	bpa	bbr	gka	lpf	ngo	sme
		i	C14143	Adipyl-CoA;	C14144	5-Carboxy-2-pentenoyl-CoA	1.3.99.-	<Oxidoreductases; Acting on the CH-CH group of donors; With other acceptors>	map00930	Caprolactam degradation	bbr	ssp	mxa				eco	son		bba	bpa	bbr	gka	lpf	ngo	sme
Subsystem 36	0.0028145229383619475										bbr	ssp	mxa				eco	son		bba	bpa	bbr	gka	lpf	ngo	sme
		i	C00154	Palmitoyl-CoA;	C05272	trans-Hexadec-2-enoyl-CoA;	1.3.99.-	<Oxidoreductases; Acting on the CH-CH group of donors; With other acceptors>	map00071	Fatty acid metabolism	bbr	ssp	mxa				eco	son		bba	bpa	bbr	gka	lpf	ngo	sme
		x	C00154	Palmitoyl-CoA;	C00249	Hexadecanoic acid;	6.2.1.3	long-chain-fatty-acid---CoA ligase;	map00071	Fatty acid metabolism	bbr	ssp	mxa	lil			eco	son		bba	bpa	bbr	gka	lpf	ngo	sme	cte	cli		aae		nam
		x	C00249	Hexadecanoic acid;	C05764	Hexadecanoyl-[acp];	2.3.1.-	<Transferases; Acyltransferases; Transferring groups other than amino-acyl groups>	map00061; map01040	Fatty acid biosynthesis; Biosynthesis of unsaturated fatty acids	bbr	ssp	mxa	lil	hpa	lin	eco	son		bba	bpa	bbr	gka	lpf	ngo	sme	cte	cli	tdn	aae	hth	nam
		x	C05763	trans-Hexadec-2-enoyl-[acp];	C05764	Hexadecanoyl-[acp];	2.3.1.-	<Transferases; Acyltransferases; Transferring groups other than amino-acyl groups>	map00061	Fatty acid biosynthesis	bbr	ssp	mxa	lil	hpa	lin	eco	son		bba	bpa	bbr	gka	lpf	ngo	sme	cte	cli	tdn	aae	hth	nam
		x	C04633	(3R)-3-Hydroxypalmitoyl-[acyl-carrier protein];	C05763	trans-Hexadec-2-enoyl-[acp];	2.3.1.-	<Transferases; Acyltransferases; Transferring groups other than amino-acyl groups>	map00061	Fatty acid biosynthesis	bbr	ssp	mxa	lil	hpa	lin	eco	son		bba	bpa	bbr	gka	lpf	ngo	sme	cte	cli	tdn	aae	hth	nam
		x	C04633	(3R)-3-Hydroxypalmitoyl-[acyl-carrier protein];	C05762	3-Oxohexadecanoyl-[acp];	1.1.1.100	3-oxoacyl-[acyl-carrier-protein] reductase;	map00061	Fatty acid biosynthesis	bbr	ssp	mxa	lil	hpa	lin	eco	son	ama	bba	bpa	bbr	gka	lpf	ngo	sme	cte	cli	tdn	aae	hth	nam
		x	C01209	Malonyl-[acyl-carrier protein]	C05762	3-Oxohexadecanoyl-[acp];	2.3.1.-	<Transferases; Acyltransferases; Transferring groups other than amino-acyl groups>	map00061	Fatty acid biosynthesis	bbr	ssp	mxa	lil	hpa	lin	eco	son		bba	bpa	bbr	gka	lpf	ngo	sme	cte	cli	tdn	aae	hth	nam
		x	C01209	Malonyl-[acyl-carrier protein]	C05756	3-Oxododecanoyl-[acp];	2.3.1.-	<Transferases; Acyltransferases; Transferring groups other than amino-acyl groups>	map00061	Fatty acid biosynthesis	bbr	ssp	mxa	lil	hpa	lin	eco	son		bba	bpa	bbr	gka	lpf	ngo	sme	cte	cli	tdn	aae	hth	nam
		x	C01209	Malonyl-[acyl-carrier protein]	C05750	3-Oxooctanoyl-[acp];	2.3.1.-	<Transferases; Acyltransferases; Transferring groups other than amino-acyl groups>	map00061	Fatty acid biosynthesis	bbr	ssp	mxa	lil	hpa	lin	eco	son		bba	bpa	bbr	gka	lpf	ngo	sme	cte	cli	tdn	aae	hth	nam
		x	C05755	Decanoyl-[acp];	C05756	3-Oxododecanoyl-[acp];	2.3.1.179	beta-ketoacyl-acyl-carrier-protein synthase II;	map00061	Fatty acid biosynthesis	bbr	ssp	mxa	lil	hpa	lin	eco	son	ama	bba	bpa	bbr	gka	lpf	ngo	sme	cte	cli	tdn	aae	hth	nam
		x	C04633	(3R)-3-Hydroxypalmitoyl-[acyl-carrier protein];	C05762	3-Oxohexadecanoyl-[acp];	2.3.1.-	<Transferases; Acyltransferases; Transferring groups other than amino-acyl groups>	map00061	Fatty acid biosynthesis	bbr	ssp	mxa	lil	hpa	lin	eco	son		bba	bpa	bbr	gka	lpf	ngo	sme	cte	cli	tdn	aae	hth	nam
		x	C01209	Malonyl-[acyl-carrier protein]	C05753	3-Oxodecanoyl-[acp];	2.3.1.-	<Transferases; Acyltransferases; Transferring groups other than amino-acyl groups>	map00061	Fatty acid biosynthesis	bbr	ssp	mxa	lil	hpa	lin	eco	son		bba	bpa	bbr	gka	lpf	ngo	sme	cte	cli	tdn	aae	hth	nam
		x	C05752	Octanoyl-[acp];	C05753	3-Oxodecanoyl-[acp];	2.3.1.179	beta-ketoacyl-acyl-carrier-protein synthase II;	map00061	Fatty acid biosynthesis	bbr	ssp	mxa	lil	hpa	lin	eco	son	ama	bba	bpa	bbr	gka	lpf	ngo	sme	cte	cli	tdn	aae	hth	nam
		x	C01209	Malonyl-[acyl-carrier protein]	C05753	3-Oxodecanoyl-[acp];	2.3.1.179	beta-ketoacyl-acyl-carrier-protein synthase II;	map00061	Fatty acid biosynthesis	bbr	ssp	mxa	lil	hpa	lin	eco	son	ama	bba	bpa	bbr	gka	lpf	ngo	sme	cte	cli	tdn	aae	hth	nam
		x	C01209	Malonyl-[acyl-carrier protein]	C05744	Acetoacetyl-[acp];	2.3.1.-	<Transferases; Acyltransferases; Transferring groups other than amino-acyl groups>	map00061	Fatty acid biosynthesis	bbr	ssp	mxa	lil	hpa	lin	eco	son		bba	bpa	bbr	gka	lpf	ngo	sme	cte	cli	tdn	aae	hth	nam
		x	C03939	Acetyl-[acyl-carrier protein]	C05744	Acetoacetyl-[acp];	2.3.1.-	<Transferases; Acyltransferases; Transferring groups other than amino-acyl groups>	map00061	Fatty acid biosynthesis	bbr	ssp	mxa	lil	hpa	lin	eco	son		bba	bpa	bbr	gka	lpf	ngo	sme	cte	cli	tdn	aae	hth	nam
		x	C00024	Acetyl-CoA;	C03939	Acetyl-[acyl-carrier protein]	2.3.1.-	<Transferases; Acyltransferases; Transferring groups other than amino-acyl groups>	map00061	Fatty acid biosynthesis	bbr	ssp	mxa	lil	hpa	lin	eco	son		bba	bpa	bbr	gka	lpf	ngo	sme	cte	cli	tdn	aae	hth	nam
		x	C00024	Acetyl-CoA;	C03939	Acetyl-[acyl-carrier protein]	2.3.1.180	beta-ketoacyl-acyl-carrier-protein synthase III;	map00061	Fatty acid biosynthesis	bbr	ssp	mxa	lil	hpa	lin	eco	son	ama	bba	bpa	bbr	gka	lpf	ngo	sme	cte	cli	tdn	aae	hth	nam
		x	C04620	(3R)-3-Hydroxyoctanoyl-[acyl-carrier protein];	C05750	3-Oxooctanoyl-[acp];	2.3.1.-	<Transferases; Acyltransferases; Transferring groups other than amino-acyl groups>	map00061	Fatty acid biosynthesis	bbr	ssp	mxa	lil	hpa	lin	eco	son		bba	bpa	bbr	gka	lpf	ngo	sme	cte	cli	tdn	aae	hth	nam
		x	C04620	(3R)-3-Hydroxyoctanoyl-[acyl-carrier protein];	C05751	trans-Oct-2-enoyl-[acp];	2.3.1.-	<Transferases; Acyltransferases; Transferring groups other than amino-acyl groups>	map00061	Fatty acid biosynthesis	bbr	ssp	mxa	lil	hpa	lin	eco	son		bba	bpa	bbr	gka	lpf	ngo	sme	cte	cli	tdn	aae	hth	nam
		x	C05754	trans-Dec-2-enoyl-[acp];	C05755	Decanoyl-[acp];	2.3.1.-	<Transferases; Acyltransferases; Transferring groups other than amino-acyl groups>	map00061	Fatty acid biosynthesis	bbr	ssp	mxa	lil	hpa	lin	eco	son		bba	bpa	bbr	gka	lpf	ngo	sme	cte	cli	tdn	aae	hth	nam
		x	C01209	Malonyl-[acyl-carrier protein]	C05759	3-Oxotetradecanoyl-[acp];	2.3.1.179	beta-ketoacyl-acyl-carrier-protein synthase II;	map00061	Fatty acid biosynthesis	bbr	ssp	mxa	lil	hpa	lin	eco	son	ama	bba	bpa	bbr	gka	lpf	ngo	sme	cte	cli	tdn	aae	hth	nam
		x	C04688	(3R)-3-Hydroxytetradecanoyl-[acyl-carrier protein];	C05759	3-Oxotetradecanoyl-[acp];	2.3.1.-	<Transferases; Acyltransferases; Transferring groups other than amino-acyl groups>	map00061	Fatty acid biosynthesis	bbr	ssp	mxa	lil	hpa	lin	eco	son		bba	bpa	bbr	gka	lpf	ngo	sme	cte	cli	tdn	aae	hth	nam
		x	C05223	Dodecanoyl-[acyl-carrier protein];	C05759	3-Oxotetradecanoyl-[acp];	2.3.1.179	beta-ketoacyl-acyl-carrier-protein synthase II;	map00061	Fatty acid biosynthesis	bbr	ssp	mxa	lil	hpa	lin	eco	son	ama	bba	bpa	bbr	gka	lpf	ngo	sme	cte	cli	tdn	aae	hth	nam
		x	C05749	Hexanoyl-[acp];	C05750	3-Oxooctanoyl-[acp];	2.3.1.179	beta-ketoacyl-acyl-carrier-protein synthase II;	map00061	Fatty acid biosynthesis	bbr	ssp	mxa	lil	hpa	lin	eco	son	ama	bba	bpa	bbr	gka	lpf	ngo	sme	cte	cli	tdn	aae	hth	nam
		x	C05748	trans-Hex-2-enoyl-[acp];	C05749	Hexanoyl-[acp];	2.3.1.-	<Transferases; Acyltransferases; Transferring groups other than amino-acyl groups>	map00061	Fatty acid biosynthesis	bbr	ssp	mxa	lil	hpa	lin	eco	son		bba	bpa	bbr	gka	lpf	ngo	sme	cte	cli	tdn	aae	hth	nam
		x	C01209	Malonyl-[acyl-carrier protein]	C05759	3-Oxotetradecanoyl-[acp];	2.3.1.-	<Transferases; Acyltransferases; Transferring groups other than amino-acyl groups>	map00061	Fatty acid biosynthesis	bbr	ssp	mxa	lil	hpa	lin	eco	son		bba	bpa	bbr	gka	lpf	ngo	sme	cte	cli	tdn	aae	hth	nam
		x	C03939	Acetyl-[acyl-carrier protein]	C05744	Acetoacetyl-[acp];	2.3.1.179	beta-ketoacyl-acyl-carrier-protein synthase II;	map00061	Fatty acid biosynthesis	bbr	ssp	mxa	lil	hpa	lin	eco	son	ama	bba	bpa	bbr	gka	lpf	ngo	sme	cte	cli	tdn	aae	hth	nam
		x	C03939	Acetyl-[acyl-carrier protein]	C05744	Acetoacetyl-[acp];	2.3.1.180	beta-ketoacyl-acyl-carrier-protein synthase III;	map00061	Fatty acid biosynthesis	bbr	ssp	mxa	lil	hpa	lin	eco	son	ama	bba	bpa	bbr	gka	lpf	ngo	sme	cte	cli	tdn	aae	hth	nam
		x	C05756	3-Oxododecanoyl-[acp];	C05757	(R)-3-Hydroxydodecanoyl-[acp];	2.3.1.-	<Transferases; Acyltransferases; Transferring groups other than amino-acyl groups>	map00061	Fatty acid biosynthesis	bbr	ssp	mxa	lil	hpa	lin	eco	son		bba	bpa	bbr	gka	lpf	ngo	sme	cte	cli	tdn	aae	hth	nam
		x	C05757	(R)-3-Hydroxydodecanoyl-[acp];	C05758	trans-Dodec-2-enoyl-[acp];	2.3.1.-	<Transferases; Acyltransferases; Transferring groups other than amino-acyl groups>	map00061	Fatty acid biosynthesis	bbr	ssp	mxa	lil	hpa	lin	eco	son		bba	bpa	bbr	gka	lpf	ngo	sme	cte	cli	tdn	aae	hth	nam
		x	C01209	Malonyl-[acyl-carrier protein]	C05756	3-Oxododecanoyl-[acp];	2.3.1.179	beta-ketoacyl-acyl-carrier-protein synthase II;	map00061	Fatty acid biosynthesis	bbr	ssp	mxa	lil	hpa	lin	eco	son	ama	bba	bpa	bbr	gka	lpf	ngo	sme	cte	cli	tdn	aae	hth	nam
		x	C05749	Hexanoyl-[acp];	C05750	3-Oxooctanoyl-[acp];	2.3.1.-	<Transferases; Acyltransferases; Transferring groups other than amino-acyl groups>	map00061	Fatty acid biosynthesis	bbr	ssp	mxa	lil	hpa	lin	eco	son		bba	bpa	bbr	gka	lpf	ngo	sme	cte	cli	tdn	aae	hth	nam
		x	C00083	Malonyl-CoA;	C01209	Malonyl-[acyl-carrier protein]	2.3.1.39	[acyl-carrier-protein] S-malonyltransferase;	map00061	Fatty acid biosynthesis	bbr	ssp	mxa		hpa	lin	eco	son	ama	bba	bpa	bbr	gka	lpf	ngo	sme	cte	cli	tdn	aae	hth	nam
		x	C01209	Malonyl-[acyl-carrier protein]	C05746	3-Oxohexanoyl-[acp];	2.3.1.-	<Transferases; Acyltransferases; Transferring groups other than amino-acyl groups>	map00061	Fatty acid biosynthesis	bbr	ssp	mxa	lil	hpa	lin	eco	son		bba	bpa	bbr	gka	lpf	ngo	sme	cte	cli	tdn	aae	hth	nam
		x	C05746	3-Oxohexanoyl-[acp];	C05747	(R)-3-Hydroxyhexanoyl-[acp];	1.1.1.100	3-oxoacyl-[acyl-carrier-protein] reductase;	map00061	Fatty acid biosynthesis	bbr	ssp	mxa	lil	hpa	lin	eco	son	ama	bba	bpa	bbr	gka	lpf	ngo	sme	cte	cli	tdn	aae	hth	nam
		x	C05755	Decanoyl-[acp];	C05756	3-Oxododecanoyl-[acp];	2.3.1.-	<Transferases; Acyltransferases; Transferring groups other than amino-acyl groups>	map00061	Fatty acid biosynthesis	bbr	ssp	mxa	lil	hpa	lin	eco	son		bba	bpa	bbr	gka	lpf	ngo	sme	cte	cli	tdn	aae	hth	nam
		x	C05747	(R)-3-Hydroxyhexanoyl-[acp];	C05748	trans-Hex-2-enoyl-[acp];	2.3.1.-	<Transferases; Acyltransferases; Transferring groups other than amino-acyl groups>	map00061	Fatty acid biosynthesis	bbr	ssp	mxa	lil	hpa	lin	eco	son		bba	bpa	bbr	gka	lpf	ngo	sme	cte	cli	tdn	aae	hth	nam
		x	C00022	Pyruvate;	C00024	Acetyl-CoA;	2.3.1.12	dihydrolipoyllysine-residue acetyltransferase;	map00010; map00020; map00620	Glycolysis / Gluconeogenesis; Citrate cycle (TCA cycle); Pyruvate metabolism	bbr	ssp	mxa	lil		lin	eco	son	ama	bba	bpa	bbr	gka	lpf	ngo	sme					hth	nam
		x	C01209	Malonyl-[acyl-carrier protein]	C05746	3-Oxohexanoyl-[acp];	2.3.1.179	beta-ketoacyl-acyl-carrier-protein synthase II;	map00061	Fatty acid biosynthesis	bbr	ssp	mxa	lil	hpa	lin	eco	son	ama	bba	bpa	bbr	gka	lpf	ngo	sme	cte	cli	tdn	aae	hth	nam
		x	C04688	(3R)-3-Hydroxytetradecanoyl-[acyl-carrier protein];	C05760	trans-Tetradec-2-enoyl-[acp];	2.3.1.-	<Transferases; Acyltransferases; Transferring groups other than amino-acyl groups>	map00061	Fatty acid biosynthesis	bbr	ssp	mxa	lil	hpa	lin	eco	son		bba	bpa	bbr	gka	lpf	ngo	sme	cte	cli	tdn	aae	hth	nam
		x	C05760	trans-Tetradec-2-enoyl-[acp];	C05761	Tetradecanoyl-[acp];	2.3.1.-	<Transferases; Acyltransferases; Transferring groups other than amino-acyl groups>	map00061	Fatty acid biosynthesis	bbr	ssp	mxa	lil	hpa	lin	eco	son		bba	bpa	bbr	gka	lpf	ngo	sme	cte	cli	tdn	aae	hth	nam
		x	C05751	trans-Oct-2-enoyl-[acp];	C05752	Octanoyl-[acp];	2.3.1.-	<Transferases; Acyltransferases; Transferring groups other than amino-acyl groups>	map00061	Fatty acid biosynthesis	bbr	ssp	mxa	lil	hpa	lin	eco	son		bba	bpa	bbr	gka	lpf	ngo	sme	cte	cli	tdn	aae	hth	nam
		x	C00022	Pyruvate;	C05125	2-(alpha-Hydroxyethyl)thiamine diphosphate;	1.2.4.1	pyruvate dehydrogenase (acetyl-transferring);	map00010; map00020; map00290; map00620; map00650	Glycolysis / Gluconeogenesis; Citrate cycle (TCA cycle); Valine, leucine and isoleucine biosynthesis; Pyruvate metabolism; Butanoate metabolism	bbr	ssp	mxa	lil		lin	eco	son	ama	bba	bpa	bbr	gka	lpf	ngo	sme					hth	nam
		x	C01209	Malonyl-[acyl-carrier protein]	C05744	Acetoacetyl-[acp];	2.3.1.179	beta-ketoacyl-acyl-carrier-protein synthase II;	map00061	Fatty acid biosynthesis	bbr	ssp	mxa	lil	hpa	lin	eco	son	ama	bba	bpa	bbr	gka	lpf	ngo	sme	cte	cli	tdn	aae	hth	nam
		x	C00022	Pyruvate;	C00074	Phosphoenolpyruvate;	2.7.1.40	pyruvate kinase;	map00010; map00620; map00710	Glycolysis / Gluconeogenesis; Pyruvate metabolism; Carbon fixation in photosynthetic organisms	bbr	ssp	mxa	lil		lin	eco	son		bba	bpa	bbr	gka	lpf	ngo	sme						nam
		x	C01209	Malonyl-[acyl-carrier protein]	C05750	3-Oxooctanoyl-[acp];	2.3.1.179	beta-ketoacyl-acyl-carrier-protein synthase II;	map00061	Fatty acid biosynthesis	bbr	ssp	mxa	lil	hpa	lin	eco	son	ama	bba	bpa	bbr	gka	lpf	ngo	sme	cte	cli	tdn	aae	hth	nam
		x	C00024	Acetyl-CoA;	C00158	Citrate;	2.3.3.1	citrate (Si)-synthase;	map00020; map00630	Citrate cycle (TCA cycle); Glyoxylate and dicarboxylate metabolism	bbr	ssp	mxa	lil	hpa	lin	eco	son	ama	bba	bpa	bbr	gka	lpf	ngo	sme	cte	cli	tdn	aae	hth
		x	C00158	Citrate;	C00417	cis-Aconitate;	4.2.1.3	aconitate hydratase;	map00020; map00630; map00720	Citrate cycle (TCA cycle); Glyoxylate and dicarboxylate metabolism; Reductive carboxylate cycle (CO2 fixation)	bbr	ssp	mxa	lil	hpa	lin	eco	son	ama	bba	bpa	bbr	gka	lpf	ngo	sme	cte	cli	tdn	aae	hth	nam
		x	C00022	Pyruvate;	C00024	Acetyl-CoA;	1.8.1.4	dihydrolipoyl dehydrogenase;	map00010; map00020; map00620	Glycolysis / Gluconeogenesis; Citrate cycle (TCA cycle); Pyruvate metabolism	bbr	ssp	mxa	lil		lin	eco	son	ama	bba	bpa	bbr	gka	lpf	ngo	sme	cte	cli		aae	hth	nam
		x	C00036	Oxaloacetate;	C00158	Citrate;	2.3.3.1	citrate (Si)-synthase;	map00020; map00630	Citrate cycle (TCA cycle); Glyoxylate and dicarboxylate metabolism	bbr	ssp	mxa	lil	hpa	lin	eco	son	ama	bba	bpa	bbr	gka	lpf	ngo	sme	cte	cli	tdn	aae	hth
		x	C01209	Malonyl-[acyl-carrier protein]	C05744	Acetoacetyl-[acp];	2.3.1.180	beta-ketoacyl-acyl-carrier-protein synthase III;	map00061	Fatty acid biosynthesis	bbr	ssp	mxa	lil	hpa	lin	eco	son	ama	bba	bpa	bbr	gka	lpf	ngo	sme	cte	cli	tdn	aae	hth	nam
		x	C05746	3-Oxohexanoyl-[acp];	C05747	(R)-3-Hydroxyhexanoyl-[acp];	2.3.1.-	<Transferases; Acyltransferases; Transferring groups other than amino-acyl groups>	map00061	Fatty acid biosynthesis	bbr	ssp	mxa	lil	hpa	lin	eco	son		bba	bpa	bbr	gka	lpf	ngo	sme	cte	cli	tdn	aae	hth	nam
		x	C00022	Pyruvate;	C00024	Acetyl-CoA;	1.2.4.1	pyruvate dehydrogenase (acetyl-transferring);	map00010; map00020; map00290; map00620; map00650	Glycolysis / Gluconeogenesis; Citrate cycle (TCA cycle); Valine, leucine and isoleucine biosynthesis; Pyruvate metabolism; Butanoate metabolism	bbr	ssp	mxa	lil		lin	eco	son	ama	bba	bpa	bbr	gka	lpf	ngo	sme					hth	nam
		x	C04619	(3R)-3-Hydroxydecanoyl-[acyl-carrier protein];	C05753	3-Oxodecanoyl-[acp];	1.1.1.100	3-oxoacyl-[acyl-carrier-protein] reductase;	map00061	Fatty acid biosynthesis	bbr	ssp	mxa	lil	hpa	lin	eco	son	ama	bba	bpa	bbr	gka	lpf	ngo	sme	cte	cli	tdn	aae	hth	nam
		x	C00074	Phosphoenolpyruvate;	C04691	2-Dehydro-3-deoxy-D-arabino-heptonate 7-phosphate;	2.5.1.54	3-deoxy-7-phosphoheptulonate synthase;	map00400	Phenylalanine, tyrosine and tryptophan biosynthesis	bbr	ssp	mxa	lil	hpa	lin	eco	son		bba	bpa	bbr	gka	lpf	ngo	sme	cte	cli	tdn			nam
		x	C00944	3-Dehydroquinate;	C04691	2-Dehydro-3-deoxy-D-arabino-heptonate 7-phosphate;	4.2.3.4	3-dehydroquinate synthase;	map00400	Phenylalanine, tyrosine and tryptophan biosynthesis	bbr	ssp	mxa	lil	hpa	lin	eco	son		bba	bpa	bbr	gka	lpf	ngo	sme	cte	cli	tdn			nam
		x	C00279	D-Erythrose 4-phosphate	C04691	2-Dehydro-3-deoxy-D-arabino-heptonate 7-phosphate;	2.5.1.54	3-deoxy-7-phosphoheptulonate synthase;	map00400	Phenylalanine, tyrosine and tryptophan biosynthesis	bbr	ssp	mxa	lil	hpa	lin	eco	son		bba	bpa	bbr	gka	lpf	ngo	sme	cte	cli	tdn			nam
		x	C00118	D-Glyceraldehyde 3-phosphate;	C00279	D-Erythrose 4-phosphate	2.2.1.1	transketolase;	map00030; map00710	Pentose phosphate pathway; Carbon fixation in photosynthetic organisms	bbr	ssp	mxa	lil	hpa	lin	eco	son	ama	bba	bpa	bbr	gka	lpf	ngo	sme	cte	cli	tdn	aae	hth	nam
		x	C00118	D-Glyceraldehyde 3-phosphate;	C00231	D-Xylulose 5-phosphate	2.2.1.1	transketolase;	map00030; map00710	Pentose phosphate pathway; Carbon fixation in photosynthetic organisms	bbr	ssp	mxa	lil	hpa	lin	eco	son	ama	bba	bpa	bbr	gka	lpf	ngo	sme	cte	cli	tdn	aae	hth	nam
		x	C00199	D-Ribulose 5-phosphate	C00231	D-Xylulose 5-phosphate	5.1.3.1	ribulose-phosphate 3-epimerase;	map00030; map00040; map00710	Pentose phosphate pathway; Pentose and glucuronate interconversions; Carbon fixation in photosynthetic organisms	bbr	ssp	mxa	lil	hpa	lin	eco	son	ama	bba	bpa	bbr	gka	lpf	ngo	sme	cte	cli	tdn	aae	hth	nam
		x	C00231	D-Xylulose 5-phosphate	C05345	beta-D-Fructose 6-phosphate	2.2.1.1	transketolase;	map00030	Pentose phosphate pathway	bbr	ssp	mxa	lil	hpa	lin	eco	son	ama	bba	bpa	bbr	gka	lpf	ngo	sme	cte	cli	tdn	aae	hth	nam
		x	C00668	alpha-D-Glucose 6-phosphate	C05345	beta-D-Fructose 6-phosphate	5.3.1.9	glucose-6-phosphate isomerase;	map00010; map00030; map00500; map00520	Glycolysis / Gluconeogenesis; Pentose phosphate pathway; Starch and sucrose metabolism; Amino sugar and nucleotide sugar metabolism	bbr	ssp	mxa	lil	hpa	lin	eco	son		bba	bpa	bbr	gka	lpf	ngo	sme	cte	cli	tdn	aae	hth	nam
		x	C00118	D-Glyceraldehyde 3-phosphate;	C00236	3-Phospho-D-glyceroyl phosphate;	1.2.1.12	glyceraldehyde-3-phosphate dehydrogenase (phosphorylating);	map00010	Glycolysis / Gluconeogenesis	bbr	ssp	mxa	lil	hpa	lin	eco	son	ama	bba	bpa	bbr	gka	lpf	ngo	sme	cte	cli	tdn	aae	hth	nam
		x	C00231	D-Xylulose 5-phosphate	C05382	Sedoheptulose 7-phosphate;	2.2.1.1	transketolase;	map00030; map00710	Pentose phosphate pathway; Carbon fixation in photosynthetic organisms	bbr	ssp	mxa	lil	hpa	lin	eco	son	ama	bba	bpa	bbr	gka	lpf	ngo	sme	cte	cli	tdn	aae	hth	nam
		x	C00668	alpha-D-Glucose 6-phosphate	C01172	beta-D-Glucose 6-phosphate	5.3.1.9	glucose-6-phosphate isomerase;	map00010; map00030; map00500	Glycolysis / Gluconeogenesis; Pentose phosphate pathway; Starch and sucrose metabolism	bbr	ssp	mxa	lil	hpa	lin	eco	son		bba	bpa	bbr	gka	lpf	ngo	sme	cte	cli	tdn	aae	hth	nam
		x	C00197	3-Phospho-D-glycerate;	C00236	3-Phospho-D-glyceroyl phosphate;	2.7.2.3	phosphoglycerate kinase;	map00010; map00710	Glycolysis / Gluconeogenesis; Carbon fixation in photosynthetic organisms	bbr	ssp	mxa	lil	hpa	lin	eco	son	ama	bba	bpa	bbr	gka	lpf	ngo	sme	cte	cli	tdn	aae	hth	nam
		x	C00197	3-Phospho-D-glycerate;	C00631	2-Phospho-D-glycerate;	5.4.2.1	phosphoglycerate mutase;	map00010	Glycolysis / Gluconeogenesis	bbr	ssp	mxa	lil	hpa	lin	eco	son	ama	bba	bpa	bbr	gka	lpf	ngo	sme	cte	cli	tdn	aae	hth	nam
		x	C01172	beta-D-Glucose 6-phosphate	C05345	beta-D-Fructose 6-phosphate	5.3.1.9	glucose-6-phosphate isomerase;	map00010; map00030; map00500	Glycolysis / Gluconeogenesis; Pentose phosphate pathway; Starch and sucrose metabolism	bbr	ssp	mxa	lil	hpa	lin	eco	son		bba	bpa	bbr	gka	lpf	ngo	sme	cte	cli	tdn	aae	hth	nam
		x	C00118	D-Glyceraldehyde 3-phosphate;	C05378	beta-D-Fructose 1,6-bisphosphate	4.1.2.13	fructose-bisphosphate aldolase;	map00010; map00030; map00051	Glycolysis / Gluconeogenesis; Pentose phosphate pathway; Fructose and mannose metabolism	bbr	ssp	mxa	lil	hpa	lin	eco	son	ama	bba	bpa	bbr	gka	lpf	ngo	sme	cte	cli	tdn	aae	hth	nam
		x	C00117	D-Ribose 5-phosphate;	C00118	D-Glyceraldehyde 3-phosphate;	2.2.1.1	transketolase;	map00030; map00710	Pentose phosphate pathway; Carbon fixation in photosynthetic organisms	bbr	ssp	mxa	lil	hpa	lin	eco	son	ama	bba	bpa	bbr	gka	lpf	ngo	sme	cte	cli	tdn	aae	hth	nam
		x	C00117	D-Ribose 5-phosphate;	C00119	5-Phospho-alpha-D-ribose 1-diphosphate;	2.7.6.1	ribose-phosphate diphosphokinase;	map00030; map00230	Pentose phosphate pathway; Purine metabolism	bbr	ssp	mxa	lil	hpa	lin	eco	son	ama	bba	bpa	bbr	gka	lpf	ngo	sme	cte	cli	tdn	aae	hth	nam
		x	C00119	5-Phospho-alpha-D-ribose 1-diphosphate;	C03090	5-Phosphoribosylamine;	2.4.2.14	amidophosphoribosyltransferase;	map00230	Purine metabolism	bbr	ssp	mxa	lil		lin	eco	son	ama	bba	bpa	bbr	gka	lpf	ngo	sme	cte	cli	tdn	aae	hth	nam
		x	C03090	5-Phosphoribosylamine;	C03838	5'-Phosphoribosylglycinamide;	6.3.4.13	phosphoribosylamine---glycine ligase;	map00230	Purine metabolism	bbr	ssp	mxa	lil	hpa	lin	eco	son	ama	bba	bpa	bbr	gka	lpf	ngo	sme	cte	cli	tdn	aae	hth	nam
		x	C01209	Malonyl-[acyl-carrier protein]	C05762	3-Oxohexadecanoyl-[acp];	2.3.1.179	beta-ketoacyl-acyl-carrier-protein synthase II;	map00061	Fatty acid biosynthesis	bbr	ssp	mxa	lil	hpa	lin	eco	son	ama	bba	bpa	bbr	gka	lpf	ngo	sme	cte	cli	tdn	aae	hth	nam
		x	C04619	(3R)-3-Hydroxydecanoyl-[acyl-carrier protein];	C05754	trans-Dec-2-enoyl-[acp];	2.3.1.-	<Transferases; Acyltransferases; Transferring groups other than amino-acyl groups>	map00061	Fatty acid biosynthesis	bbr	ssp	mxa	lil	hpa	lin	eco	son		bba	bpa	bbr	gka	lpf	ngo	sme	cte	cli	tdn	aae	hth	nam
		x	C00119	5-Phospho-alpha-D-ribose 1-diphosphate;	C01103	Orotidine 5'-phosphate;	2.4.2.10	orotate phosphoribosyltransferase;	map00240	Pyrimidine metabolism	bbr	ssp	mxa	lil	hpa	lin	eco	son	ama	bba	bpa	bbr	gka	lpf	ngo	sme	cte	cli	tdn	aae	hth	nam
		x	C00105	UMP;	C01103	Orotidine 5'-phosphate;	4.1.1.23	orotidine-5'-phosphate decarboxylase;	map00240	Pyrimidine metabolism	bbr	ssp	mxa	lil	hpa	lin	eco	son	ama	bba	bpa	bbr	gka	lpf	ngo	sme	cte	cli	tdn	aae	hth	nam
		x	C00105	UMP;	C00106	Uracil	2.4.2.9	uracil phosphoribosyltransferase;	map00240	Pyrimidine metabolism	bbr	ssp	mxa			lin	eco	son		bba	bpa	bbr	gka	lpf	ngo	sme				aae
		x	C00015	UDP;	C00105	UMP;	2.7.4.14	cytidylate kinase;	map00240	Pyrimidine metabolism	bbr	ssp	mxa	lil		lin	eco	son	ama	bba	bpa	bbr	gka	lpf	ngo	sme	cte	cli		aae	hth
		x	C00015	UDP;	C00075	UTP;	2.7.4.6	nucleoside-diphosphate kinase;	map00240	Pyrimidine metabolism	bbr	ssp	mxa	lil	hpa	lin	eco	son	ama	bba	bpa	bbr	gka	lpf	ngo	sme	cte	cli	tdn	aae	hth	nam
		x	C00063	CTP;	C00075	UTP;	6.3.4.2	CTP synthase;	map00240	Pyrimidine metabolism	bbr	ssp	mxa	lil	hpa	lin	eco	son	ama	bba	bpa	bbr	gka	lpf	ngo	sme	cte	cli	tdn	aae	hth	nam
		x	C00063	CTP;	C00112	CDP;	2.7.4.6	nucleoside-diphosphate kinase;	map00240	Pyrimidine metabolism	bbr	ssp	mxa	lil	hpa	lin	eco	son	ama	bba	bpa	bbr	gka	lpf	ngo	sme	cte	cli	tdn	aae	hth	nam
		x	C00055	CMP;	C00112	CDP;	2.7.4.14	cytidylate kinase;	map00240	Pyrimidine metabolism	bbr	ssp	mxa	lil		lin	eco	son	ama	bba	bpa	bbr	gka	lpf	ngo	sme	cte	cli		aae	hth
		x	C00046	RNA;	C00063	CTP;	2.7.7.6	DNA-directed RNA polymerase;	map00240	Pyrimidine metabolism	bbr	ssp	mxa	lil	hpa	lin	eco	son	ama	bba	bpa	bbr	gka	lpf	ngo	sme	cte	cli	tdn	aae	hth	nam
		x	C00002	ATP;	C00046	RNA;	2.7.7.6	DNA-directed RNA polymerase;	map00230	Purine metabolism	bbr	ssp	mxa	lil	hpa	lin	eco	son	ama	bba	bpa	bbr	gka	lpf	ngo	sme	cte	cli	tdn	aae	hth	nam
		x	C00044	GTP;	C00046	RNA;	2.7.7.6	DNA-directed RNA polymerase;	map00230	Purine metabolism	bbr	ssp	mxa	lil	hpa	lin	eco	son	ama	bba	bpa	bbr	gka	lpf	ngo	sme	cte	cli	tdn	aae	hth	nam
		x	C00044	GTP;	C01304	2,5-Diamino-6-(5'-phosphoribosylamino)-4-pyrimidineone	3.5.4.25	GTP cyclohydrolase II;	map00740	Riboflavin metabolism	bbr	ssp	mxa	lil	hpa		eco	son	ama	bba	bpa	bbr	gka	lpf	ngo	sme	cte	cli	tdn	aae	hth	nam
		x	C00035	GDP;	C00044	GTP;	2.7.4.6	nucleoside-diphosphate kinase;	map00230	Purine metabolism	bbr	ssp	mxa	lil	hpa	lin	eco	son	ama	bba	bpa	bbr	gka	lpf	ngo	sme	cte	cli	tdn	aae	hth	nam
		x	C00035	GDP;	C00361	dGDP;	1.17.4.1	ribonucleoside-diphosphate reductase;	map00230	Purine metabolism	bbr	ssp	mxa	lil	hpa	lin	eco	son	ama	bba	bpa	bbr	gka	lpf	ngo	sme	cte	cli	tdn	aae	hth	nam
		x	C00286	dGTP;	C00361	dGDP;	2.7.1.40	pyruvate kinase;	map00230	Purine metabolism	bbr	ssp	mxa	lil		lin	eco	son		bba	bpa	bbr	gka	lpf	ngo	sme						nam
		x	C00039	DNA;	C00286	dGTP;	2.7.7.7	DNA-directed DNA polymerase;	map00230	Purine metabolism	bbr	ssp	mxa	lil	hpa	lin	eco	son	ama	bba	bpa	bbr	gka	lpf	ngo	sme	cte	cli	tdn	aae	hth	nam
		x	C00039	DNA;	C00458	dCTP;	2.7.7.7	DNA-directed DNA polymerase;	map00240	Pyrimidine metabolism	bbr	ssp	mxa	lil	hpa	lin	eco	son	ama	bba	bpa	bbr	gka	lpf	ngo	sme	cte	cli	tdn	aae	hth	nam
		x	C00458	dCTP;	C00705	dCDP;	2.7.4.6	nucleoside-diphosphate kinase;	map00240	Pyrimidine metabolism	bbr	ssp	mxa	lil	hpa	lin	eco	son	ama	bba	bpa	bbr	gka	lpf	ngo	sme	cte	cli	tdn	aae	hth	nam
		x	C00239	dCMP;	C00705	dCDP;	2.7.4.14	cytidylate kinase;	map00240	Pyrimidine metabolism	bbr	ssp	mxa	lil		lin	eco	son	ama	bba	bpa	bbr	gka	lpf	ngo	sme	cte	cli		aae	hth
		x	C00039	DNA;	C00459	dTTP;	2.7.7.7	DNA-directed DNA polymerase;	map00240	Pyrimidine metabolism	bbr	ssp	mxa	lil	hpa	lin	eco	son	ama	bba	bpa	bbr	gka	lpf	ngo	sme	cte	cli	tdn	aae	hth	nam
		x	C00363	dTDP;	C00459	dTTP;	2.7.4.6	nucleoside-diphosphate kinase;	map00240	Pyrimidine metabolism	bbr	ssp	mxa	lil	hpa	lin	eco	son	ama	bba	bpa	bbr	gka	lpf	ngo	sme	cte	cli	tdn	aae	hth	nam
		x	C00363	dTDP;	C00364	dTMP;	2.7.4.9	dTMP kinase;	map00240	Pyrimidine metabolism	bbr	ssp	mxa	lil	hpa	lin	eco	son	ama	bba	bpa	bbr	gka	lpf	ngo	sme	cte	cli	tdn	aae	hth	nam
		x	C00035	GDP;	C00144	GMP;	2.7.4.8	guanylate kinase;	map00230	Purine metabolism	bbr	ssp	mxa	lil	hpa	lin	eco	son	ama	bba	bpa	bbr	gka	lpf	ngo	sme	cte	cli	tdn	aae	hth	nam
		x	C00286	dGTP;	C00361	dGDP;	2.7.4.6	nucleoside-diphosphate kinase;	map00230	Purine metabolism	bbr	ssp	mxa	lil	hpa	lin	eco	son	ama	bba	bpa	bbr	gka	lpf	ngo	sme	cte	cli	tdn	aae	hth	nam
		x	C00364	dTMP;	C00365	dUMP;	2.1.1.45	thymidylate synthase;	map00240	Pyrimidine metabolism	bbr	ssp	mxa	lil		lin	eco	son		bba	bpa	bbr	gka	lpf	ngo	sme
		x	C00365	dUMP;	C01346	dUDP;	2.7.4.9	dTMP kinase;	map00240	Pyrimidine metabolism	bbr	ssp	mxa	lil	hpa	lin	eco	son	ama	bba	bpa	bbr	gka	lpf	ngo	sme	cte	cli	tdn	aae	hth	nam
		x	C00460	dUTP;	C01346	dUDP;	2.7.4.6	nucleoside-diphosphate kinase;	map00240	Pyrimidine metabolism	bbr	ssp	mxa	lil	hpa	lin	eco	son	ama	bba	bpa	bbr	gka	lpf	ngo	sme	cte	cli	tdn	aae	hth	nam
		x	C00039	DNA;	C00131	dATP;	2.7.7.7	DNA-directed DNA polymerase;	map00230	Purine metabolism	bbr	ssp	mxa	lil	hpa	lin	eco	son	ama	bba	bpa	bbr	gka	lpf	ngo	sme	cte	cli	tdn	aae	hth	nam
		x	C00131	dATP;	C00206	dADP;	2.7.1.40	pyruvate kinase;	map00230	Purine metabolism	bbr	ssp	mxa	lil		lin	eco	son		bba	bpa	bbr	gka	lpf	ngo	sme						nam
		x	C00206	dADP;	C00360	dAMP;	2.7.4.3	adenylate kinase;	map00230	Purine metabolism	bbr	ssp	mxa	lil	hpa	lin	eco	son	ama	bba	bpa	bbr	gka	lpf	ngo	sme	cte	cli	tdn	aae	hth	nam
		x	C00008	ADP;	C00206	dADP;	1.17.4.1	ribonucleoside-diphosphate reductase;	map00230	Purine metabolism	bbr	ssp	mxa	lil	hpa	lin	eco	son	ama	bba	bpa	bbr	gka	lpf	ngo	sme	cte	cli	tdn	aae	hth	nam
		x	C00361	dGDP;	C00362	dGMP;	2.7.4.8	guanylate kinase;	map00230	Purine metabolism	bbr	ssp	mxa	lil	hpa	lin	eco	son	ama	bba	bpa	bbr	gka	lpf	ngo	sme	cte	cli	tdn	aae	hth	nam
		x	C04618	(3R)-3-Hydroxybutanoyl-[acyl-carrier protein];	C05744	Acetoacetyl-[acp];	2.3.1.-	<Transferases; Acyltransferases; Transferring groups other than amino-acyl groups>	map00061	Fatty acid biosynthesis	bbr	ssp	mxa	lil	hpa	lin	eco	son		bba	bpa	bbr	gka	lpf	ngo	sme	cte	cli	tdn	aae	hth	nam
		x	C04246	But-2-enoyl-[acyl-carrier protein]	C04618	(3R)-3-Hydroxybutanoyl-[acyl-carrier protein];	2.3.1.-	<Transferases; Acyltransferases; Transferring groups other than amino-acyl groups>	map00061	Fatty acid biosynthesis	bbr	ssp	mxa	lil	hpa	lin	eco	son		bba	bpa	bbr	gka	lpf	ngo	sme	cte	cli	tdn	aae	hth	nam
		x	C04246	But-2-enoyl-[acyl-carrier protein]	C05745	Butyryl-[acp];	2.3.1.-	<Transferases; Acyltransferases; Transferring groups other than amino-acyl groups>	map00061	Fatty acid biosynthesis	bbr	ssp	mxa	lil	hpa	lin	eco	son		bba	bpa	bbr	gka	lpf	ngo	sme	cte	cli	tdn	aae	hth	nam
		x	C05756	3-Oxododecanoyl-[acp];	C05757	(R)-3-Hydroxydodecanoyl-[acp];	1.1.1.100	3-oxoacyl-[acyl-carrier-protein] reductase;	map00061	Fatty acid biosynthesis	bbr	ssp	mxa	lil	hpa	lin	eco	son	ama	bba	bpa	bbr	gka	lpf	ngo	sme	cte	cli	tdn	aae	hth	nam
		x	C00131	dATP;	C00206	dADP;	2.7.4.6	nucleoside-diphosphate kinase;	map00230	Purine metabolism	bbr	ssp	mxa	lil	hpa	lin	eco	son	ama	bba	bpa	bbr	gka	lpf	ngo	sme	cte	cli	tdn	aae	hth	nam
		x	C00352	D-Glucosamine 6-phosphate;	C05345	beta-D-Fructose 6-phosphate	3.5.1.-	<Hydrolases; Acting on carbon-nitrogen bonds, other than peptide bonds; In linear amides>	map00520	Amino sugar and nucleotide sugar metabolism	bbr	ssp	mxa	lil	hpa	lin	eco	son		bba	bpa	bbr	gka	lpf	ngo	sme	cte	cli	tdn	aae	hth	nam
		x	C00352	D-Glucosamine 6-phosphate;	C06156	alpha-D-Glucosamine 1-phosphate;	5.4.2.10	phosphoglucosamine mutase	map00520	Amino sugar and nucleotide sugar metabolism	bbr	ssp	mxa		hpa	lin	eco	son	ama	bba	bpa	bbr	gka	lpf	ngo	sme			tdn			nam
		x	C05745	Butyryl-[acp];	C05746	3-Oxohexanoyl-[acp];	2.3.1.179	beta-ketoacyl-acyl-carrier-protein synthase II;	map00061	Fatty acid biosynthesis	bbr	ssp	mxa	lil	hpa	lin	eco	son	ama	bba	bpa	bbr	gka	lpf	ngo	sme	cte	cli	tdn	aae	hth	nam
		x	C01268	5-Amino-6-(5'-phosphoribosylamino)uracil;	C01304	2,5-Diamino-6-(5'-phosphoribosylamino)-4-pyrimidineone	3.5.4.26	diaminohydroxyphosphoribosylaminopyrimidine deaminase	map00740	Riboflavin metabolism	bbr	ssp	mxa	lil	hpa		eco	son	ama	bba	bpa	bbr	gka	lpf	ngo	sme	cte	cli	tdn	aae	hth	nam
		x	C01268	5-Amino-6-(5'-phosphoribosylamino)uracil;	C04454	5-Amino-6-(5'-phosphoribitylamino)uracil;	1.1.1.193	5-amino-6-(5-phosphoribosylamino)uracil reductase;	map00740	Riboflavin metabolism	bbr	ssp	mxa	lil	hpa		eco	son	ama	bba	bpa	bbr	gka	lpf	ngo	sme	cte	cli	tdn	aae	hth	nam
		x	C05752	Octanoyl-[acp];	C05753	3-Oxodecanoyl-[acp];	2.3.1.-	<Transferases; Acyltransferases; Transferring groups other than amino-acyl groups>	map00061	Fatty acid biosynthesis	bbr	ssp	mxa	lil	hpa	lin	eco	son		bba	bpa	bbr	gka	lpf	ngo	sme	cte	cli	tdn	aae	hth	nam
		x	C00144	GMP;	C00655	Xanthosine 5'-phosphate;	6.3.5.2	GMP synthase (glutamine-hydrolysing);	map00230	Purine metabolism	bbr	ssp	mxa	lil	hpa	lin	eco	son	ama	bba	bpa	bbr	gka	lpf	ngo	sme	cte	cli	tdn	aae	hth	nam
		x	C00130	IMP;	C00655	Xanthosine 5'-phosphate;	1.1.1.205	IMP dehydrogenase;	map00230	Purine metabolism	bbr	ssp	mxa	lil	hpa	lin	eco	son	ama	bba	bpa	bbr	gka	lpf	ngo	sme	cte	cli	tdn	aae	hth	nam
		x	C00130	IMP;	C04734	1-(5'-Phosphoribosyl)-5-formamido-4-imidazolecarboxamide;	3.5.4.10	IMP cyclohydrolase;	map00230	Purine metabolism	bbr	ssp	mxa	lil		lin	eco	son	ama	bba	bpa	bbr	gka	lpf	ngo	sme	cte	cli	tdn	aae	hth	nam
		x	C04677	1-(5'-Phosphoribosyl)-5-amino-4-imidazolecarboxamide;	C04734	1-(5'-Phosphoribosyl)-5-formamido-4-imidazolecarboxamide;	6.3.4.-	<Ligases; Forming carbon-nitrogen bonds; Other carbon--nitrogen ligases>	map00230	Purine metabolism	bbr	ssp	mxa	lil	hpa	lin	eco	son	ama	bba	bpa	bbr	gka	lpf	ngo	sme	cte	cli	tdn	aae	hth	nam
		x	C04677	1-(5'-Phosphoribosyl)-5-amino-4-imidazolecarboxamide;	C04823	1-(5'-Phosphoribosyl)-5-amino-4-(N-succinocarboxamide)-imidazole;	4.3.2.2	adenylosuccinate lyase;	map00230	Purine metabolism	bbr	ssp	mxa	lil	hpa	lin	eco	son	ama	bba	bpa	bbr	gka	lpf	ngo	sme	cte	cli	tdn	aae	hth	nam
		x	C04751	1-(5-Phospho-D-ribosyl)-5-amino-4-imidazolecarboxylate;	C04823	1-(5'-Phosphoribosyl)-5-amino-4-(N-succinocarboxamide)-imidazole;	6.3.2.6	phosphoribosylaminoimidazolesuccinocarboxamide synthase;	map00230	Purine metabolism	bbr	ssp	mxa	lil		lin	eco	son	ama	bba	bpa	bbr	gka	lpf	ngo	sme	cte	cli	tdn	aae	hth	nam
		x	C04751	1-(5-Phospho-D-ribosyl)-5-amino-4-imidazolecarboxylate;	C15667	5-Carboxyamino-1-(5-phospho-D-ribosyl)imidazole	5.4.99.18	5-(carboxyamino)imidazole ribonucleotide mutase;	map00230	Purine metabolism	bbr	ssp	mxa	lil		lin	eco	son	ama	bba	bpa	bbr	gka	lpf	ngo	sme	cte	cli	tdn	aae	hth	nam
		x	C00130	IMP;	C04734	1-(5'-Phosphoribosyl)-5-formamido-4-imidazolecarboxamide;	2.1.2.3	phosphoribosylaminoimidazolecarboxamide formyltransferase;	map00230	Purine metabolism	bbr	ssp	mxa	lil		lin	eco	son	ama	bba	bpa	bbr	gka	lpf	ngo	sme	cte	cli	tdn	aae	hth	nam
		x	C00130	IMP;	C03794	N6-(1,2-Dicarboxyethyl)-AMP;	6.3.4.4	adenylosuccinate synthase;	map00230	Purine metabolism	bbr	ssp	mxa	lil	hpa	lin	eco	son	ama	bba	bpa	bbr	gka	lpf	ngo	sme	cte	cli	tdn	aae	hth	nam
		x	C00020	AMP;	C03794	N6-(1,2-Dicarboxyethyl)-AMP;	4.3.2.2	adenylosuccinate lyase;	map00230	Purine metabolism	bbr	ssp	mxa	lil	hpa	lin	eco	son	ama	bba	bpa	bbr	gka	lpf	ngo	sme	cte	cli	tdn	aae	hth	nam
		x	C04677	1-(5'-Phosphoribosyl)-5-amino-4-imidazolecarboxamide;	C04734	1-(5'-Phosphoribosyl)-5-formamido-4-imidazolecarboxamide;	2.1.2.3	phosphoribosylaminoimidazolecarboxamide formyltransferase;	map00230	Purine metabolism	bbr	ssp	mxa	lil		lin	eco	son	ama	bba	bpa	bbr	gka	lpf	ngo	sme	cte	cli	tdn	aae	hth	nam
		x	C00046	RNA;	C00075	UTP;	2.7.7.6	DNA-directed RNA polymerase;	map00240	Pyrimidine metabolism	bbr	ssp	mxa	lil	hpa	lin	eco	son	ama	bba	bpa	bbr	gka	lpf	ngo	sme	cte	cli	tdn	aae	hth	nam
		x	C00279	D-Erythrose 4-phosphate	C05345	beta-D-Fructose 6-phosphate	2.2.1.1	transketolase;	map00030	Pentose phosphate pathway	bbr	ssp	mxa	lil	hpa	lin	eco	son	ama	bba	bpa	bbr	gka	lpf	ngo	sme	cte	cli	tdn	aae	hth	nam
		x	C05223	Dodecanoyl-[acyl-carrier protein];	C05758	trans-Dodec-2-enoyl-[acp];	2.3.1.-	<Transferases; Acyltransferases; Transferring groups other than amino-acyl groups>	map00061	Fatty acid biosynthesis	bbr	ssp	mxa	lil	hpa	lin	eco	son		bba	bpa	bbr	gka	lpf	ngo	sme	cte	cli	tdn	aae	hth	nam
		x	C00074	Phosphoenolpyruvate;	C00631	2-Phospho-D-glycerate;	4.2.1.11	phosphopyruvate hydratase;	map00010	Glycolysis / Gluconeogenesis	bbr	ssp	mxa	lil	hpa	lin	eco	son	ama	bba	bpa	bbr	gka	lpf	ngo	sme	cte	cli	tdn	aae	hth	nam
		x	C00002	ATP;	C00008	ADP;	2.7.4.6	nucleoside-diphosphate kinase;	map00230	Purine metabolism	bbr	ssp	mxa	lil	hpa	lin	eco	son	ama	bba	bpa	bbr	gka	lpf	ngo	sme	cte	cli	tdn	aae	hth	nam
		x	C00002	ATP;	C00008	ADP;	2.7.1.40	pyruvate kinase;	map00230	Purine metabolism	bbr	ssp	mxa	lil		lin	eco	son		bba	bpa	bbr	gka	lpf	ngo	sme						nam
		x	C00311	Isocitrate;	C00417	cis-Aconitate;	4.2.1.3	aconitate hydratase;	map00020; map00630; map00720	Citrate cycle (TCA cycle); Glyoxylate and dicarboxylate metabolism; Reductive carboxylate cycle (CO2 fixation)	bbr	ssp	mxa	lil	hpa	lin	eco	son	ama	bba	bpa	bbr	gka	lpf	ngo	sme	cte	cli	tdn	aae	hth	nam
		x	C00117	D-Ribose 5-phosphate;	C05382	Sedoheptulose 7-phosphate;	2.2.1.1	transketolase;	map00030; map00710	Pentose phosphate pathway; Carbon fixation in photosynthetic organisms	bbr	ssp	mxa	lil	hpa	lin	eco	son	ama	bba	bpa	bbr	gka	lpf	ngo	sme	cte	cli	tdn	aae	hth	nam
		x	C00111	Glycerone phosphate;	C00118	D-Glyceraldehyde 3-phosphate;	5.3.1.1	triose-phosphate isomerase;	map00010; map00051; map00562; map00710	Glycolysis / Gluconeogenesis; Fructose and mannose metabolism; Inositol phosphate metabolism; Carbon fixation in photosynthetic organisms	bbr	ssp	mxa	lil	hpa	lin	eco	son	ama	bba	bpa	bbr	gka	lpf	ngo	sme	cte	cli	tdn	aae	hth	nam
		x	C00111	Glycerone phosphate;	C01094	D-Fructose 1-phosphate	4.1.2.13	fructose-bisphosphate aldolase;	map00051	Fructose and mannose metabolism	bbr	ssp	mxa	lil	hpa	lin	eco	son	ama	bba	bpa	bbr	gka	lpf	ngo	sme	cte	cli	tdn	aae	hth	nam
		x	C05761	Tetradecanoyl-[acp];	C05762	3-Oxohexadecanoyl-[acp];	2.3.1.-	<Transferases; Acyltransferases; Transferring groups other than amino-acyl groups>	map00061	Fatty acid biosynthesis	bbr	ssp	mxa	lil	hpa	lin	eco	son		bba	bpa	bbr	gka	lpf	ngo	sme	cte	cli	tdn	aae	hth	nam
		x	C00008	ADP;	C00020	AMP;	2.7.4.3	adenylate kinase;	map00230	Purine metabolism	bbr	ssp	mxa	lil	hpa	lin	eco	son	ama	bba	bpa	bbr	gka	lpf	ngo	sme	cte	cli	tdn	aae	hth	nam
		x	C00111	Glycerone phosphate;	C05378	beta-D-Fructose 1,6-bisphosphate	4.1.2.13	fructose-bisphosphate aldolase;	map00010; map00051	Glycolysis / Gluconeogenesis; Fructose and mannose metabolism	bbr	ssp	mxa	lil	hpa	lin	eco	son	ama	bba	bpa	bbr	gka	lpf	ngo	sme	cte	cli	tdn	aae	hth	nam
		x	C04619	(3R)-3-Hydroxydecanoyl-[acyl-carrier protein];	C05753	3-Oxodecanoyl-[acp];	2.3.1.-	<Transferases; Acyltransferases; Transferring groups other than amino-acyl groups>	map00061	Fatty acid biosynthesis	bbr	ssp	mxa	lil	hpa	lin	eco	son		bba	bpa	bbr	gka	lpf	ngo	sme	cte	cli	tdn	aae	hth	nam
		x	C00112	CDP;	C00705	dCDP;	1.17.4.1	ribonucleoside-diphosphate reductase;	map00240	Pyrimidine metabolism	bbr	ssp	mxa	lil	hpa	lin	eco	son	ama	bba	bpa	bbr	gka	lpf	ngo	sme	cte	cli	tdn	aae	hth	nam
		x	C00352	D-Glucosamine 6-phosphate;	C05345	beta-D-Fructose 6-phosphate	2.6.1.16	glutamine---fructose-6-phosphate transaminase (isomerizing);	map00520	Amino sugar and nucleotide sugar metabolism	bbr	ssp	mxa	lil	hpa	lin	eco	son	ama	bba	bpa	bbr	gka	lpf	ngo	sme	cte	cli	tdn	aae	hth	nam
		x	C04620	(3R)-3-Hydroxyoctanoyl-[acyl-carrier protein];	C05750	3-Oxooctanoyl-[acp];	1.1.1.100	3-oxoacyl-[acyl-carrier-protein] reductase;	map00061	Fatty acid biosynthesis	bbr	ssp	mxa	lil	hpa	lin	eco	son	ama	bba	bpa	bbr	gka	lpf	ngo	sme	cte	cli	tdn	aae	hth	nam
		x	C05223	Dodecanoyl-[acyl-carrier protein];	C05759	3-Oxotetradecanoyl-[acp];	2.3.1.-	<Transferases; Acyltransferases; Transferring groups other than amino-acyl groups>	map00061	Fatty acid biosynthesis	bbr	ssp	mxa	lil	hpa	lin	eco	son		bba	bpa	bbr	gka	lpf	ngo	sme	cte	cli	tdn	aae	hth	nam
		x	C04501	N-Acetyl-alpha-D-glucosamine 1-phosphate	C06156	alpha-D-Glucosamine 1-phosphate;	2.3.1.157	glucosamine-1-phosphate N-acetyltransferase	map00520	Amino sugar and nucleotide sugar metabolism	bbr	ssp	mxa		hpa	lin	eco	son	ama	bba	bpa	bbr	gka	lpf	ngo	sme			tdn	aae	hth	nam
		x	C00043	UDP-N-acetyl-D-glucosamine;	C04501	N-Acetyl-alpha-D-glucosamine 1-phosphate	2.7.7.23	UDP-N-acetylglucosamine diphosphorylase;	map00520	Amino sugar and nucleotide sugar metabolism	bbr	ssp	mxa	lil	hpa	lin	eco	son	ama	bba	bpa	bbr	gka	lpf	ngo	sme	cte	cli	tdn	aae	hth	nam
		x	C00043	UDP-N-acetyl-D-glucosamine;	C04631	UDP-N-acetyl-3-(1-carboxyvinyl)-D-glucosamine;	2.5.1.7	UDP-N-acetylglucosamine 1-carboxyvinyltransferase;	map00520; map00550	Amino sugar and nucleotide sugar metabolism; Peptidoglycan biosynthesis	bbr	ssp	mxa	lil	hpa	lin	eco	son	ama	bba	bpa	bbr	gka	lpf	ngo	sme	cte	cli	tdn	aae	hth	nam
		x	C01050	UDP-N-acetylmuramate;	C04631	UDP-N-acetyl-3-(1-carboxyvinyl)-D-glucosamine;	1.1.1.158	UDP-N-acetylmuramate dehydrogenase;	map00520; map00550	Amino sugar and nucleotide sugar metabolism; Peptidoglycan biosynthesis	bbr	ssp	mxa	lil	hpa	lin	eco	son	ama	bba	bpa	bbr	gka	lpf	ngo	sme	cte	cli	tdn	aae	hth	nam
		x	C01050	UDP-N-acetylmuramate;	C01212	UDP-N-acetylmuramoyl-L-alanine	6.3.2.8	UDP-N-acetylmuramate---L-alanine ligase;	map00471; map00550	D-Glutamine and D-glutamate metabolism; Peptidoglycan biosynthesis	bbr	ssp	mxa	lil	hpa	lin	eco	son	ama	bba	bpa	bbr	gka	lpf	ngo	sme	cte	cli	tdn	aae	hth	nam
		x	C00692	UDP-N-acetylmuramoyl-L-alanyl-D-glutamate	C01212	UDP-N-acetylmuramoyl-L-alanine	6.3.2.9	UDP-N-acetylmuramoyl-L-alanine---D-glutamate ligase;	map00471; map00550	D-Glutamine and D-glutamate metabolism; Peptidoglycan biosynthesis	bbr	ssp	mxa	lil	hpa	lin	eco	son	ama	bba	bpa	bbr	gka	lpf	ngo	sme	cte	cli	tdn	aae	hth	nam
		x	C00117	D-Ribose 5-phosphate;	C00199	D-Ribulose 5-phosphate	5.3.1.6	ribose-5-phosphate isomerase;	map00030; map00710	Pentose phosphate pathway; Carbon fixation in photosynthetic organisms	bbr	ssp	mxa	lil	hpa	lin	eco	son	ama	bba	bpa	bbr	gka	lpf	ngo	sme	cte	cli	tdn	aae	hth	nam
		x	C00295	Orotate;	C01103	Orotidine 5'-phosphate;	2.4.2.10	orotate phosphoribosyltransferase;	map00240	Pyrimidine metabolism	bbr	ssp	mxa	lil	hpa	lin	eco	son	ama	bba	bpa	bbr	gka	lpf	ngo	sme	cte	cli	tdn	aae	hth	nam
		x	C00295	Orotate;	C00337	(S)-Dihydroorotate;	1.3.3.1	dihydroorotate oxidase;	map00240	Pyrimidine metabolism	bbr	ssp	mxa	lil	hpa	lin	eco	son	ama	bba	bpa	bbr	gka	lpf	ngo	sme	cte	cli	tdn	aae	hth	nam
		x	C00337	(S)-Dihydroorotate;	C00438	N-Carbamoyl-L-aspartate	3.5.2.3	dihydroorotase;	map00240	Pyrimidine metabolism	bbr	ssp	mxa	lil	hpa	lin	eco	son	ama	bba	bpa	bbr	gka	lpf	ngo	sme	cte	cli	tdn	aae	hth	nam
		x	C00169	Carbamoyl phosphate	C00438	N-Carbamoyl-L-aspartate	2.1.3.2	aspartate carbamoyltransferase;	map00240; map00250	Pyrimidine metabolism; Alanine, aspartate and glutamate metabolism	bbr	ssp	mxa	lil	hpa	lin	eco	son	ama	bba	bpa	bbr	gka	lpf	ngo	sme	cte	cli	tdn	aae	hth	nam
		x	C00064	L-Glutamine;	C00169	Carbamoyl phosphate	6.3.5.5	carbamoyl-phosphate synthase (glutamine-hydrolysing);	map00240; map00250	Pyrimidine metabolism; Alanine, aspartate and glutamate metabolism	bbr	ssp	mxa	lil	hpa	lin	eco	son	ama	bba	bpa	bbr	gka	lpf	ngo	sme	cte	cli	tdn	aae	hth	nam
		x	C00025	L-Glutamate;	C00064	L-Glutamine;	6.3.1.2	glutamate---ammonia ligase;	map00250; map00330; map00910	Alanine, aspartate and glutamate metabolism; Arginine and proline metabolism; Nitrogen metabolism	bbr	ssp	mxa	lil	hpa	lin	eco	son	ama	bba	bpa	bbr	gka	lpf	ngo	sme	cte	cli	tdn	aae	hth	nam
		x	C03838	5'-Phosphoribosylglycinamide;	C04376	5'-Phosphoribosyl-N-formylglycinamide;	2.1.2.2	phosphoribosylglycinamide formyltransferase;	map00230	Purine metabolism	bbr	ssp	mxa	lil		lin	eco	son	ama	bba	bpa	bbr	gka	lpf	ngo	sme	cte	cli	tdn	aae	hth	nam
		x	C04376	5'-Phosphoribosyl-N-formylglycinamide;	C04640	2-(Formamido)-N1-(5'-phosphoribosyl)acetamidine;	6.3.5.3	phosphoribosylformylglycinamidine synthase;	map00230	Purine metabolism	bbr	ssp	mxa	lil		lin	eco	son	ama	bba	bpa	bbr	gka	lpf	ngo	sme	cte	cli	tdn	aae	hth	nam
		x	C03373	Aminoimidazole ribotide;	C04640	2-(Formamido)-N1-(5'-phosphoribosyl)acetamidine;	6.3.3.1	phosphoribosylformylglycinamidine cyclo-ligase;	map00230	Purine metabolism	bbr	ssp	mxa	lil		lin	eco	son	ama	bba	bpa	bbr	gka	lpf	ngo	sme	cte	cli	tdn	aae	hth	nam
		x	C05745	Butyryl-[acp];	C05746	3-Oxohexanoyl-[acp];	2.3.1.-	<Transferases; Acyltransferases; Transferring groups other than amino-acyl groups>	map00061	Fatty acid biosynthesis	bbr	ssp	mxa	lil	hpa	lin	eco	son		bba	bpa	bbr	gka	lpf	ngo	sme	cte	cli	tdn	aae	hth	nam
		x	C05761	Tetradecanoyl-[acp];	C05762	3-Oxohexadecanoyl-[acp];	2.3.1.179	beta-ketoacyl-acyl-carrier-protein synthase II;	map00061	Fatty acid biosynthesis	bbr	ssp	mxa	lil	hpa	lin	eco	son	ama	bba	bpa	bbr	gka	lpf	ngo	sme	cte	cli	tdn	aae	hth	nam
		x	C04618	(3R)-3-Hydroxybutanoyl-[acyl-carrier protein];	C05744	Acetoacetyl-[acp];	1.1.1.100	3-oxoacyl-[acyl-carrier-protein] reductase;	map00061	Fatty acid biosynthesis	bbr	ssp	mxa	lil	hpa	lin	eco	son	ama	bba	bpa	bbr	gka	lpf	ngo	sme	cte	cli	tdn	aae	hth	nam
Subsystem 37	0.0028145229383619475										bbr		mxa	lil		lin	eco	son			bpa	bbr	gka	lpf	ngo	sme
		i	C01005	O-Phospho-L-serine;	C03232	3-Phosphonooxypyruvate;	2.6.1.52	phosphoserine transaminase;	map00260	Glycine, serine and threonine metabolism	bbr		mxa	lil		lin	eco	son			bpa	bbr	gka	lpf	ngo	sme
Subsystem 38	0.0028145229383619475										bbr	ssp	mxa				eco	son		bba	bpa	bbr	gka	lpf	ngo	sme
		i	C00136	Butanoyl-CoA;	C00877	Crotonoyl-CoA;	1.3.99.-	<Oxidoreductases; Acting on the CH-CH group of donors; With other acceptors>	map00071	Fatty acid metabolism	bbr	ssp	mxa				eco	son		bba	bpa	bbr	gka	lpf	ngo	sme
Subsystem 39	0.0028145229383619475										bbr	ssp	mxa				eco	son		bba	bpa	bbr	gka	lpf	ngo	sme
		i	C00630	2-Methylpropanoyl-CoA;	C03460	2-Methylprop-2-enoyl-CoA;	1.3.99.-	<Oxidoreductases; Acting on the CH-CH group of donors; With other acceptors>	map00280	Valine, leucine and isoleucine degradation	bbr	ssp	mxa				eco	son		bba	bpa	bbr	gka	lpf	ngo	sme
Subsystem 40	0.0028145229383619475										bbr		mxa	lil	hpa		eco	son		bba	bpa	bbr		lpf	ngo	sme
		i	C03657	1,4-Dihydroxy-2-naphthoate;	C15547	1,4-Dihydroxy-2-naphthoyl-CoA	3.1.2.-	<Hydrolases; Acting on ester bonds; Thiolester hydrolases>	map00130	Ubiquinone and other terpenoid-quinone biosynthesis	bbr		mxa	lil	hpa		eco	son		bba	bpa	bbr		lpf	ngo	sme
		x	C03657	1,4-Dihydroxy-2-naphthoate;	C13309	2-Phytyl-1,4-naphthoquinone;	2.5.1.-	<Transferases; Transferring alkyl or aryl groups, other than methyl groups; Transferring alkyl or aryl groups, other than methyl groups>	map00130	Ubiquinone and other terpenoid-quinone biosynthesis	bbr	ssp	mxa	lil	hpa	lin	eco	son	ama	bba	bpa	bbr	gka	lpf	ngo	sme	cte	cli	tdn	aae	hth	nam
		x	C02059	Phylloquinone;	C13309	2-Phytyl-1,4-naphthoquinone;	2.1.1.-	<Transferases; Transferring one-carbon groups; Methyltransferases>	map00130	Ubiquinone and other terpenoid-quinone biosynthesis	bbr	ssp	mxa	lil	hpa	lin	eco	son	ama	bba	bpa	bbr	gka	lpf	ngo	sme	cte	cli	tdn	aae	hth	nam
		x	C03657	1,4-Dihydroxy-2-naphthoate;	C05818	2-Demethylmenaquinone	2.5.1.-	<Transferases; Transferring alkyl or aryl groups, other than methyl groups; Transferring alkyl or aryl groups, other than methyl groups>	map00130	Ubiquinone and other terpenoid-quinone biosynthesis	bbr	ssp	mxa	lil	hpa	lin	eco	son	ama	bba	bpa	bbr	gka	lpf	ngo	sme	cte	cli	tdn	aae	hth	nam
		x	C00828	Menaquinone;	C05818	2-Demethylmenaquinone	2.1.1.-	<Transferases; Transferring one-carbon groups; Methyltransferases>	map00130	Ubiquinone and other terpenoid-quinone biosynthesis	bbr	ssp	mxa	lil	hpa	lin	eco	son	ama	bba	bpa	bbr	gka	lpf	ngo	sme	cte	cli	tdn	aae	hth	nam
Subsystem 41	0.0028145229383619475										bbr	ssp	mxa	lil			eco	son		bba	bpa	bbr	gka	lpf		sme
		i	C05258	(S)-3-Hydroxyhexadecanoyl-CoA	C05272	trans-Hexadec-2-enoyl-CoA;	4.2.1.17	enoyl-CoA hydratase;	map00062; map00071	Fatty acid elongation in mitochondria; Fatty acid metabolism	bbr	ssp	mxa	lil			eco	son		bba	bpa	bbr	gka	lpf		sme
Subsystem 42	0.0028145229383619475										bbr	ssp	mxa	lil			eco	son		bba	bpa	bbr	gka	lpf		sme
		i	C05260	(S)-3-Hydroxytetradecanoyl-CoA	C05273	trans-Tetradec-2-enoyl-CoA;	4.2.1.17	enoyl-CoA hydratase;	map00062; map00071	Fatty acid elongation in mitochondria; Fatty acid metabolism	bbr	ssp	mxa	lil			eco	son		bba	bpa	bbr	gka	lpf		sme
Subsystem 43	0.0028145229383619475										bbr	ssp	mxa			lin	eco	son			bpa	bbr	gka	lpf	ngo	sme
		i	C01300	2-Amino-4-hydroxy-6-hydroxymethyl-7,8-dihydropteridine	C04874	2-Amino-4-hydroxy-6-(D-erythro-1,2,3-trihydroxypropyl)-7,8-	4.1.2.25	dihydroneopterin aldolase;	map00790	Folate biosynthesis	bbr	ssp	mxa		hpa	lin	eco	son	ama		bpa	bbr	gka	lpf	ngo	sme	cte	cli	tdn			nam
		s	C00101	Tetrahydrofolate;	C00143	5,10-Methylenetetrahydrofolate;	2.1.2.10	aminomethyltransferase;	map00260; map00670	Glycine, serine and threonine metabolism; One carbon pool by folate	bbr	ssp	mxa	lil		lin	eco	son		bba	bpa	bbr	gka	lpf	ngo	sme	cte	cli		aae	hth
		x	C00101	Tetrahydrofolate;	C00504	Folate;	1.5.1.3	dihydrofolate reductase;	map00670; map00790	One carbon pool by folate; Folate biosynthesis	bbr	ssp	mxa			lin	eco	son		bba	bpa	bbr	gka	lpf	ngo	sme
		x	C00921	Dihydropteroate;	C01300	2-Amino-4-hydroxy-6-hydroxymethyl-7,8-dihydropteridine	2.5.1.15	dihydropteroate synthase;	map00790	Folate biosynthesis	bbr	ssp	mxa	lil	hpa	lin	eco	son	ama		bpa	bbr	gka	lpf	ngo	sme	cte	cli	tdn	aae	hth	nam
		x	C00415	Dihydrofolate;	C00921	Dihydropteroate;	6.3.2.17	tetrahydrofolate synthase;	map00790	Folate biosynthesis	bbr	ssp	mxa	lil	hpa	lin	eco	son	ama		bpa	bbr	gka	lpf	ngo	sme	cte	cli	tdn	aae	hth
		x	C00921	Dihydropteroate;	C04807	2-Amino-7,8-dihydro-4-hydroxy-6-(diphosphooxymethyl)pteridine;	2.5.1.15	dihydropteroate synthase;	map00790	Folate biosynthesis	bbr	ssp	mxa	lil	hpa	lin	eco	son	ama		bpa	bbr	gka	lpf	ngo	sme	cte	cli	tdn	aae	hth	nam
		x	C00101	Tetrahydrofolate;	C00143	5,10-Methylenetetrahydrofolate;	2.1.2.1	glycine hydroxymethyltransferase;	map00260; map00670	Glycine, serine and threonine metabolism; One carbon pool by folate	bbr	ssp	mxa	lil	hpa	lin	eco	son	ama	bba	bpa	bbr	gka	lpf	ngo	sme	cte	cli	tdn	aae	hth	nam
		x	C00568	4-Aminobenzoate;	C00921	Dihydropteroate;	2.5.1.15	dihydropteroate synthase;	map00790	Folate biosynthesis	bbr	ssp	mxa	lil	hpa	lin	eco	son	ama		bpa	bbr	gka	lpf	ngo	sme	cte	cli	tdn	aae	hth	nam
		x	C00415	Dihydrofolate;	C00504	Folate;	1.5.1.3	dihydrofolate reductase;	map00670; map00790	One carbon pool by folate; Folate biosynthesis	bbr	ssp	mxa			lin	eco	son		bba	bpa	bbr	gka	lpf	ngo	sme
		x	C01300	2-Amino-4-hydroxy-6-hydroxymethyl-7,8-dihydropteridine	C04807	2-Amino-7,8-dihydro-4-hydroxy-6-(diphosphooxymethyl)pteridine;	2.7.6.3	2-amino-4-hydroxy-6-hydroxymethyldihydropteridine diphosphokinase;	map00790	Folate biosynthesis	bbr	ssp	mxa	lil	hpa	lin	eco	son	ama		bpa	bbr	gka	lpf	ngo	sme	cte	cli	tdn	aae	hth	nam
		x	C00101	Tetrahydrofolate;	C00234	10-Formyltetrahydrofolate;	2.1.2.3	phosphoribosylaminoimidazolecarboxamide formyltransferase;	map00670	One carbon pool by folate	bbr	ssp	mxa	lil		lin	eco	son	ama	bba	bpa	bbr	gka	lpf	ngo	sme	cte	cli	tdn	aae	hth	nam
		x	C00101	Tetrahydrofolate;	C00234	10-Formyltetrahydrofolate;	2.1.2.2	phosphoribosylglycinamide formyltransferase;	map00670	One carbon pool by folate	bbr	ssp	mxa	lil		lin	eco	son	ama	bba	bpa	bbr	gka	lpf	ngo	sme	cte	cli	tdn	aae	hth	nam
		x	C00101	Tetrahydrofolate;	C00445	5,10-Methenyltetrahydrofolate	2.1.2.2	phosphoribosylglycinamide formyltransferase;	map00670	One carbon pool by folate	bbr	ssp	mxa	lil		lin	eco	son	ama	bba	bpa	bbr	gka	lpf	ngo	sme	cte	cli	tdn	aae	hth	nam
		x	C00234	10-Formyltetrahydrofolate;	C00445	5,10-Methenyltetrahydrofolate	3.5.4.9	methenyltetrahydrofolate cyclohydrolase;	map00630; map00670	Glyoxylate and dicarboxylate metabolism; One carbon pool by folate	bbr	ssp	mxa	lil	hpa	lin	eco	son	ama	bba	bpa	bbr	gka	lpf	ngo	sme	cte	cli	tdn	aae	hth	nam
		x	C00143	5,10-Methylenetetrahydrofolate;	C00445	5,10-Methenyltetrahydrofolate	1.5.1.5	methylenetetrahydrofolate dehydrogenase (NADP+);	map00630; map00670	Glyoxylate and dicarboxylate metabolism; One carbon pool by folate	bbr	ssp	mxa	lil	hpa	lin	eco	son	ama	bba	bpa	bbr	gka	lpf	ngo	sme	cte	cli	tdn	aae	hth	nam
		x	C00101	Tetrahydrofolate;	C00415	Dihydrofolate;	1.5.1.3	dihydrofolate reductase;	map00670; map00790	One carbon pool by folate; Folate biosynthesis	bbr	ssp	mxa			lin	eco	son		bba	bpa	bbr	gka	lpf	ngo	sme
Subsystem 44	0.004315601838821653										bbr	ssp	mxa	lil			eco	son	ama	bba	bpa	bbr	gka	lpf	ngo	sme		cli
		i	C00091	Succinyl-CoA;	C16254	[Dihydrolipoyllysine-residue succinyltransferase]	2.3.1.61	dihydrolipoyllysine-residue succinyltransferase;	map00020	Citrate cycle (TCA cycle)	bbr	ssp	mxa	lil			eco	son	ama	bba	bpa	bbr	gka	lpf	ngo	sme		cli
		x	C00026	2-Oxoglutarate;	C16254	[Dihydrolipoyllysine-residue succinyltransferase]	1.2.4.2	oxoglutarate dehydrogenase (succinyl-transferring);	map00020	Citrate cycle (TCA cycle)	bbr	ssp	mxa	lil			eco	son	ama	bba	bpa	bbr	gka	lpf	ngo	sme		cli
		x	C15973	Enzyme N6-(dihydrolipoyl)lysine;	C16254	[Dihydrolipoyllysine-residue succinyltransferase]	2.3.1.61	dihydrolipoyllysine-residue succinyltransferase;	map00020	Citrate cycle (TCA cycle)	bbr	ssp	mxa	lil			eco	son	ama	bba	bpa	bbr	gka	lpf	ngo	sme		cli
		x	C15972	Enzyme N6-(lipoyl)lysine;	C15973	Enzyme N6-(dihydrolipoyl)lysine;	1.8.1.4	dihydrolipoyl dehydrogenase;	map00010; map00020; map00280; map00620	Glycolysis / Gluconeogenesis; Citrate cycle (TCA cycle); Valine, leucine and isoleucine degradation; Pyruvate metabolism	bbr	ssp	mxa	lil		lin	eco	son	ama	bba	bpa	bbr	gka	lpf	ngo	sme	cte	cli		aae	hth	nam
		x	C15972	Enzyme N6-(lipoyl)lysine;	C16254	[Dihydrolipoyllysine-residue succinyltransferase]	1.2.4.2	oxoglutarate dehydrogenase (succinyl-transferring);	map00020	Citrate cycle (TCA cycle)	bbr	ssp	mxa	lil			eco	son	ama	bba	bpa	bbr	gka	lpf	ngo	sme		cli
		x	C00042	Succinate;	C00091	Succinyl-CoA;	6.2.1.5	succinate---CoA ligase (ADP-forming);	map00020; map00640; map00720	Citrate cycle (TCA cycle); Propanoate metabolism; Reductive carboxylate cycle (CO2 fixation)	bbr	ssp	mxa	lil			eco	son	ama	bba	bpa	bbr	gka	lpf	ngo	sme	cte	cli	tdn	aae	hth	nam
		x	C00042	Succinate;	C00122	Fumarate;	1.3.99.1	succinate dehydrogenase;	map00020; map00190; map00632; map00650; map00720	Citrate cycle (TCA cycle); Oxidative phosphorylation; Benzoate degradation via CoA ligation; Butanoate metabolism; Reductive carboxylate cycle (CO2 fixation)	bbr	ssp	mxa	lil	hpa	lin	eco	son	ama	bba	bpa	bbr	gka	lpf	ngo	sme	cte	cli	tdn	aae	hth	nam
		x	C00122	Fumarate;	C00149	(S)-Malate;	4.2.1.2	fumarate hydratase;	map00020; map00720	Citrate cycle (TCA cycle); Reductive carboxylate cycle (CO2 fixation)	bbr	ssp	mxa	lil	hpa	lin	eco	son	ama	bba	bpa	bbr	gka	lpf	ngo	sme	cte	cli	tdn	aae	hth	nam
Subsystem 45	0.004315601838821653										bbr	ssp	mxa	lil			eco	son	ama	bba	bpa	bbr	gka	lpf	ngo	sme		cli
		i	C00527	Glutaryl-CoA	C06157	[Dihydrolipoyllysine-residue succinyltransferase]	2.3.1.61	dihydrolipoyllysine-residue succinyltransferase;	map00310	Lysine degradation	bbr	ssp	mxa	lil			eco	son	ama	bba	bpa	bbr	gka	lpf	ngo	sme		cli
		x	C00322	2-Oxoadipate;	C06157	[Dihydrolipoyllysine-residue succinyltransferase]	1.2.4.2	oxoglutarate dehydrogenase (succinyl-transferring);	map00310	Lysine degradation	bbr	ssp	mxa	lil			eco	son	ama	bba	bpa	bbr	gka	lpf	ngo	sme		cli
Subsystem 46	0.006191950464396287										bbr		mxa				eco	son	ama	bba	bpa	bbr	gka	lpf		sme
		i	C00148	L-Proline;	C03912	(S)-1-Pyrroline-5-carboxylate;	1.5.99.8	proline dehydrogenase;	map00330	Arginine and proline metabolism	bbr		mxa		hpa		eco	son	ama	bba	bpa	bbr	gka	lpf		sme			tdn
		s	C15972	Enzyme N6-(lipoyl)lysine;	C15973	Enzyme N6-(dihydrolipoyl)lysine;	1.8.1.4	dihydrolipoyl dehydrogenase;	map00010; map00020; map00280; map00620	Glycolysis / Gluconeogenesis; Citrate cycle (TCA cycle); Valine, leucine and isoleucine degradation; Pyruvate metabolism	bbr	ssp	mxa	lil		lin	eco	son	ama	bba	bpa	bbr	gka	lpf	ngo	sme	cte	cli		aae	hth	nam
		x	C15973	Enzyme N6-(dihydrolipoyl)lysine;	C16254	[Dihydrolipoyllysine-residue succinyltransferase]	2.3.1.61	dihydrolipoyllysine-residue succinyltransferase;	map00020	Citrate cycle (TCA cycle)	bbr	ssp	mxa	lil			eco	son	ama	bba	bpa	bbr	gka	lpf	ngo	sme		cli
		x	C00026	2-Oxoglutarate;	C16254	[Dihydrolipoyllysine-residue succinyltransferase]	1.2.4.2	oxoglutarate dehydrogenase (succinyl-transferring);	map00020	Citrate cycle (TCA cycle)	bbr	ssp	mxa	lil			eco	son	ama	bba	bpa	bbr	gka	lpf	ngo	sme		cli
		x	C00091	Succinyl-CoA;	C16254	[Dihydrolipoyllysine-residue succinyltransferase]	2.3.1.61	dihydrolipoyllysine-residue succinyltransferase;	map00020	Citrate cycle (TCA cycle)	bbr	ssp	mxa	lil			eco	son	ama	bba	bpa	bbr	gka	lpf	ngo	sme		cli
		x	C15972	Enzyme N6-(lipoyl)lysine;	C16254	[Dihydrolipoyllysine-residue succinyltransferase]	1.2.4.2	oxoglutarate dehydrogenase (succinyl-transferring);	map00020	Citrate cycle (TCA cycle)	bbr	ssp	mxa	lil			eco	son	ama	bba	bpa	bbr	gka	lpf	ngo	sme		cli
		x	C00025	L-Glutamate;	C00026	2-Oxoglutarate;	2.6.1.1	aspartate transaminase;	map00250	Alanine, aspartate and glutamate metabolism	bbr		mxa		hpa	lin	eco	son	ama	bba	bpa	bbr	gka	lpf	ngo	sme	cte	cli	tdn	aae	hth	nam
		x	C00025	L-Glutamate;	C00049	L-Aspartate;	2.6.1.1	aspartate transaminase;	map00250; map00330	Alanine, aspartate and glutamate metabolism; Arginine and proline metabolism	bbr		mxa		hpa	lin	eco	son	ama	bba	bpa	bbr	gka	lpf	ngo	sme	cte	cli	tdn	aae	hth	nam
		x	C00036	Oxaloacetate;	C00049	L-Aspartate;	2.6.1.1	aspartate transaminase;	map00250; map00710	Alanine, aspartate and glutamate metabolism; Carbon fixation in photosynthetic organisms	bbr		mxa		hpa	lin	eco	son	ama	bba	bpa	bbr	gka	lpf	ngo	sme	cte	cli	tdn	aae	hth	nam
		x	C00036	Oxaloacetate;	C00158	Citrate;	2.3.3.1	citrate (Si)-synthase;	map00020; map00630	Citrate cycle (TCA cycle); Glyoxylate and dicarboxylate metabolism	bbr	ssp	mxa	lil	hpa	lin	eco	son	ama	bba	bpa	bbr	gka	lpf	ngo	sme	cte	cli	tdn	aae	hth
		x	C00024	Acetyl-CoA;	C00158	Citrate;	2.3.3.1	citrate (Si)-synthase;	map00020; map00630	Citrate cycle (TCA cycle); Glyoxylate and dicarboxylate metabolism	bbr	ssp	mxa	lil	hpa	lin	eco	son	ama	bba	bpa	bbr	gka	lpf	ngo	sme	cte	cli	tdn	aae	hth
		x	C00158	Citrate;	C00417	cis-Aconitate;	4.2.1.3	aconitate hydratase;	map00020; map00630; map00720	Citrate cycle (TCA cycle); Glyoxylate and dicarboxylate metabolism; Reductive carboxylate cycle (CO2 fixation)	bbr	ssp	mxa	lil	hpa	lin	eco	son	ama	bba	bpa	bbr	gka	lpf	ngo	sme	cte	cli	tdn	aae	hth	nam
		x	C00022	Pyruvate;	C00024	Acetyl-CoA;	1.8.1.4	dihydrolipoyl dehydrogenase;	map00010; map00020; map00620	Glycolysis / Gluconeogenesis; Citrate cycle (TCA cycle); Pyruvate metabolism	bbr	ssp	mxa	lil		lin	eco	son	ama	bba	bpa	bbr	gka	lpf	ngo	sme	cte	cli		aae	hth	nam
		x	C00024	Acetyl-CoA;	C03939	Acetyl-[acyl-carrier protein]	2.3.1.180	beta-ketoacyl-acyl-carrier-protein synthase III;	map00061	Fatty acid biosynthesis	bbr	ssp	mxa	lil	hpa	lin	eco	son	ama	bba	bpa	bbr	gka	lpf	ngo	sme	cte	cli	tdn	aae	hth	nam
		x	C00049	L-Aspartate;	C03082	4-Phospho-L-aspartate;	2.7.2.4	aspartate kinase;	map00260; map00270; map00300	Glycine, serine and threonine metabolism; Cysteine and methionine metabolism; Lysine biosynthesis	bbr	ssp	mxa	lil	hpa	lin	eco	son	ama	bba	bpa	bbr	gka	lpf	ngo	sme	cte	cli	tdn	aae	hth	nam
		x	C00441	L-Aspartate 4-semialdehyde;	C03082	4-Phospho-L-aspartate;	1.2.1.11	aspartate-semialdehyde dehydrogenase;	map00260; map00270; map00300	Glycine, serine and threonine metabolism; Cysteine and methionine metabolism; Lysine biosynthesis	bbr	ssp	mxa	lil	hpa	lin	eco	son	ama	bba	bpa	bbr	gka	lpf	ngo	sme	cte	cli	tdn	aae	hth	nam
		x	C00441	L-Aspartate 4-semialdehyde;	C03340	L-2,3-Dihydrodipicolinate;	4.2.1.52	dihydrodipicolinate synthase;	map00300	Lysine biosynthesis	bbr	ssp	mxa	lil	hpa	lin	eco	son	ama	bba	bpa	bbr	gka	lpf	ngo	sme	cte	cli	tdn	aae	hth	nam
		x	C03939	Acetyl-[acyl-carrier protein]	C05744	Acetoacetyl-[acp];	2.3.1.180	beta-ketoacyl-acyl-carrier-protein synthase III;	map00061	Fatty acid biosynthesis	bbr	ssp	mxa	lil	hpa	lin	eco	son	ama	bba	bpa	bbr	gka	lpf	ngo	sme	cte	cli	tdn	aae	hth	nam
		x	C03939	Acetyl-[acyl-carrier protein]	C05744	Acetoacetyl-[acp];	2.3.1.179	beta-ketoacyl-acyl-carrier-protein synthase II;	map00061	Fatty acid biosynthesis	bbr	ssp	mxa	lil	hpa	lin	eco	son	ama	bba	bpa	bbr	gka	lpf	ngo	sme	cte	cli	tdn	aae	hth	nam
		x	C00022	Pyruvate;	C00024	Acetyl-CoA;	2.3.1.12	dihydrolipoyllysine-residue acetyltransferase;	map00010; map00020; map00620	Glycolysis / Gluconeogenesis; Citrate cycle (TCA cycle); Pyruvate metabolism	bbr	ssp	mxa	lil		lin	eco	son	ama	bba	bpa	bbr	gka	lpf	ngo	sme					hth	nam
		x	C00036	Oxaloacetate;	C00149	(S)-Malate;	1.1.1.37	malate dehydrogenase;	map00020; map00620; map00630; map00710; map00720	Citrate cycle (TCA cycle); Pyruvate metabolism; Glyoxylate and dicarboxylate metabolism; Carbon fixation in photosynthetic organisms; Reductive carboxylate cycle (CO2 fixation)	bbr	ssp	mxa	lil			eco	son	ama	bba	bpa	bbr	gka	lpf		sme	cte	cli	tdn	aae	hth	nam
		x	C00122	Fumarate;	C00149	(S)-Malate;	4.2.1.2	fumarate hydratase;	map00020; map00720	Citrate cycle (TCA cycle); Reductive carboxylate cycle (CO2 fixation)	bbr	ssp	mxa	lil	hpa	lin	eco	son	ama	bba	bpa	bbr	gka	lpf	ngo	sme	cte	cli	tdn	aae	hth	nam
		x	C00022	Pyruvate;	C05125	2-(alpha-Hydroxyethyl)thiamine diphosphate;	1.2.4.1	pyruvate dehydrogenase (acetyl-transferring);	map00010; map00020; map00290; map00620; map00650	Glycolysis / Gluconeogenesis; Citrate cycle (TCA cycle); Valine, leucine and isoleucine biosynthesis; Pyruvate metabolism; Butanoate metabolism	bbr	ssp	mxa	lil		lin	eco	son	ama	bba	bpa	bbr	gka	lpf	ngo	sme					hth	nam
		x	C01209	Malonyl-[acyl-carrier protein]	C05744	Acetoacetyl-[acp];	2.3.1.179	beta-ketoacyl-acyl-carrier-protein synthase II;	map00061	Fatty acid biosynthesis	bbr	ssp	mxa	lil	hpa	lin	eco	son	ama	bba	bpa	bbr	gka	lpf	ngo	sme	cte	cli	tdn	aae	hth	nam
		x	C01209	Malonyl-[acyl-carrier protein]	C05753	3-Oxodecanoyl-[acp];	2.3.1.179	beta-ketoacyl-acyl-carrier-protein synthase II;	map00061	Fatty acid biosynthesis	bbr	ssp	mxa	lil	hpa	lin	eco	son	ama	bba	bpa	bbr	gka	lpf	ngo	sme	cte	cli	tdn	aae	hth	nam
		x	C05752	Octanoyl-[acp];	C05753	3-Oxodecanoyl-[acp];	2.3.1.179	beta-ketoacyl-acyl-carrier-protein synthase II;	map00061	Fatty acid biosynthesis	bbr	ssp	mxa	lil	hpa	lin	eco	son	ama	bba	bpa	bbr	gka	lpf	ngo	sme	cte	cli	tdn	aae	hth	nam
		x	C01209	Malonyl-[acyl-carrier protein]	C05759	3-Oxotetradecanoyl-[acp];	2.3.1.179	beta-ketoacyl-acyl-carrier-protein synthase II;	map00061	Fatty acid biosynthesis	bbr	ssp	mxa	lil	hpa	lin	eco	son	ama	bba	bpa	bbr	gka	lpf	ngo	sme	cte	cli	tdn	aae	hth	nam
		x	C05223	Dodecanoyl-[acyl-carrier protein];	C05759	3-Oxotetradecanoyl-[acp];	2.3.1.179	beta-ketoacyl-acyl-carrier-protein synthase II;	map00061	Fatty acid biosynthesis	bbr	ssp	mxa	lil	hpa	lin	eco	son	ama	bba	bpa	bbr	gka	lpf	ngo	sme	cte	cli	tdn	aae	hth	nam
		x	C01209	Malonyl-[acyl-carrier protein]	C05756	3-Oxododecanoyl-[acp];	2.3.1.179	beta-ketoacyl-acyl-carrier-protein synthase II;	map00061	Fatty acid biosynthesis	bbr	ssp	mxa	lil	hpa	lin	eco	son	ama	bba	bpa	bbr	gka	lpf	ngo	sme	cte	cli	tdn	aae	hth	nam
		x	C05755	Decanoyl-[acp];	C05756	3-Oxododecanoyl-[acp];	2.3.1.179	beta-ketoacyl-acyl-carrier-protein synthase II;	map00061	Fatty acid biosynthesis	bbr	ssp	mxa	lil	hpa	lin	eco	son	ama	bba	bpa	bbr	gka	lpf	ngo	sme	cte	cli	tdn	aae	hth	nam
		x	C00083	Malonyl-CoA;	C01209	Malonyl-[acyl-carrier protein]	2.3.1.39	[acyl-carrier-protein] S-malonyltransferase;	map00061	Fatty acid biosynthesis	bbr	ssp	mxa		hpa	lin	eco	son	ama	bba	bpa	bbr	gka	lpf	ngo	sme	cte	cli	tdn	aae	hth	nam
		x	C01209	Malonyl-[acyl-carrier protein]	C05746	3-Oxohexanoyl-[acp];	2.3.1.179	beta-ketoacyl-acyl-carrier-protein synthase II;	map00061	Fatty acid biosynthesis	bbr	ssp	mxa	lil	hpa	lin	eco	son	ama	bba	bpa	bbr	gka	lpf	ngo	sme	cte	cli	tdn	aae	hth	nam
		x	C05746	3-Oxohexanoyl-[acp];	C05747	(R)-3-Hydroxyhexanoyl-[acp];	1.1.1.100	3-oxoacyl-[acyl-carrier-protein] reductase;	map00061	Fatty acid biosynthesis	bbr	ssp	mxa	lil	hpa	lin	eco	son	ama	bba	bpa	bbr	gka	lpf	ngo	sme	cte	cli	tdn	aae	hth	nam
		x	C00042	Succinate;	C00091	Succinyl-CoA;	6.2.1.5	succinate---CoA ligase (ADP-forming);	map00020; map00640; map00720	Citrate cycle (TCA cycle); Propanoate metabolism; Reductive carboxylate cycle (CO2 fixation)	bbr	ssp	mxa	lil			eco	son	ama	bba	bpa	bbr	gka	lpf	ngo	sme	cte	cli	tdn	aae	hth	nam
		x	C01209	Malonyl-[acyl-carrier protein]	C05750	3-Oxooctanoyl-[acp];	2.3.1.179	beta-ketoacyl-acyl-carrier-protein synthase II;	map00061	Fatty acid biosynthesis	bbr	ssp	mxa	lil	hpa	lin	eco	son	ama	bba	bpa	bbr	gka	lpf	ngo	sme	cte	cli	tdn	aae	hth	nam
		x	C05749	Hexanoyl-[acp];	C05750	3-Oxooctanoyl-[acp];	2.3.1.179	beta-ketoacyl-acyl-carrier-protein synthase II;	map00061	Fatty acid biosynthesis	bbr	ssp	mxa	lil	hpa	lin	eco	son	ama	bba	bpa	bbr	gka	lpf	ngo	sme	cte	cli	tdn	aae	hth	nam
		x	C00042	Succinate;	C00122	Fumarate;	1.3.99.1	succinate dehydrogenase;	map00020; map00190; map00632; map00650; map00720	Citrate cycle (TCA cycle); Oxidative phosphorylation; Benzoate degradation via CoA ligation; Butanoate metabolism; Reductive carboxylate cycle (CO2 fixation)	bbr	ssp	mxa	lil	hpa	lin	eco	son	ama	bba	bpa	bbr	gka	lpf	ngo	sme	cte	cli	tdn	aae	hth	nam
		x	C01209	Malonyl-[acyl-carrier protein]	C05744	Acetoacetyl-[acp];	2.3.1.180	beta-ketoacyl-acyl-carrier-protein synthase III;	map00061	Fatty acid biosynthesis	bbr	ssp	mxa	lil	hpa	lin	eco	son	ama	bba	bpa	bbr	gka	lpf	ngo	sme	cte	cli	tdn	aae	hth	nam
		x	C04619	(3R)-3-Hydroxydecanoyl-[acyl-carrier protein];	C05753	3-Oxodecanoyl-[acp];	1.1.1.100	3-oxoacyl-[acyl-carrier-protein] reductase;	map00061	Fatty acid biosynthesis	bbr	ssp	mxa	lil	hpa	lin	eco	son	ama	bba	bpa	bbr	gka	lpf	ngo	sme	cte	cli	tdn	aae	hth	nam
		x	C00022	Pyruvate;	C00024	Acetyl-CoA;	1.2.4.1	pyruvate dehydrogenase (acetyl-transferring);	map00010; map00020; map00290; map00620; map00650	Glycolysis / Gluconeogenesis; Citrate cycle (TCA cycle); Valine, leucine and isoleucine biosynthesis; Pyruvate metabolism; Butanoate metabolism	bbr	ssp	mxa	lil		lin	eco	son	ama	bba	bpa	bbr	gka	lpf	ngo	sme					hth	nam
		x	C00025	L-Glutamate;	C03912	(S)-1-Pyrroline-5-carboxylate;	1.5.1.12	1-pyrroline-5-carboxylate dehydrogenase;	map00250; map00330	Alanine, aspartate and glutamate metabolism; Arginine and proline metabolism	bbr	ssp	mxa		hpa		eco	son	ama	bba	bpa	bbr	gka	lpf		sme			tdn
		x	C01209	Malonyl-[acyl-carrier protein]	C05762	3-Oxohexadecanoyl-[acp];	2.3.1.179	beta-ketoacyl-acyl-carrier-protein synthase II;	map00061	Fatty acid biosynthesis	bbr	ssp	mxa	lil	hpa	lin	eco	son	ama	bba	bpa	bbr	gka	lpf	ngo	sme	cte	cli	tdn	aae	hth	nam
		x	C03340	L-2,3-Dihydrodipicolinate;	C03972	2,3,4,5-Tetrahydrodipicolinate;	1.3.1.26	dihydrodipicolinate reductase;	map00300	Lysine biosynthesis	bbr	ssp	mxa	lil	hpa	lin	eco	son	ama	bba	bpa	bbr	gka	lpf	ngo	sme	cte	cli	tdn	aae	hth	nam
		x	C04633	(3R)-3-Hydroxypalmitoyl-[acyl-carrier protein];	C05762	3-Oxohexadecanoyl-[acp];	1.1.1.100	3-oxoacyl-[acyl-carrier-protein] reductase;	map00061	Fatty acid biosynthesis	bbr	ssp	mxa	lil	hpa	lin	eco	son	ama	bba	bpa	bbr	gka	lpf	ngo	sme	cte	cli	tdn	aae	hth	nam
		x	C05756	3-Oxododecanoyl-[acp];	C05757	(R)-3-Hydroxydodecanoyl-[acp];	1.1.1.100	3-oxoacyl-[acyl-carrier-protein] reductase;	map00061	Fatty acid biosynthesis	bbr	ssp	mxa	lil	hpa	lin	eco	son	ama	bba	bpa	bbr	gka	lpf	ngo	sme	cte	cli	tdn	aae	hth	nam
		x	C05745	Butyryl-[acp];	C05746	3-Oxohexanoyl-[acp];	2.3.1.179	beta-ketoacyl-acyl-carrier-protein synthase II;	map00061	Fatty acid biosynthesis	bbr	ssp	mxa	lil	hpa	lin	eco	son	ama	bba	bpa	bbr	gka	lpf	ngo	sme	cte	cli	tdn	aae	hth	nam
		x	C00025	L-Glutamate;	C00064	L-Glutamine;	6.3.1.2	glutamate---ammonia ligase;	map00250; map00330; map00910	Alanine, aspartate and glutamate metabolism; Arginine and proline metabolism; Nitrogen metabolism	bbr	ssp	mxa	lil	hpa	lin	eco	son	ama	bba	bpa	bbr	gka	lpf	ngo	sme	cte	cli	tdn	aae	hth	nam
		x	C00064	L-Glutamine;	C00169	Carbamoyl phosphate	6.3.5.5	carbamoyl-phosphate synthase (glutamine-hydrolysing);	map00240; map00250	Pyrimidine metabolism; Alanine, aspartate and glutamate metabolism	bbr	ssp	mxa	lil	hpa	lin	eco	son	ama	bba	bpa	bbr	gka	lpf	ngo	sme	cte	cli	tdn	aae	hth	nam
		x	C00169	Carbamoyl phosphate	C00438	N-Carbamoyl-L-aspartate	2.1.3.2	aspartate carbamoyltransferase;	map00240; map00250	Pyrimidine metabolism; Alanine, aspartate and glutamate metabolism	bbr	ssp	mxa	lil	hpa	lin	eco	son	ama	bba	bpa	bbr	gka	lpf	ngo	sme	cte	cli	tdn	aae	hth	nam
		x	C00337	(S)-Dihydroorotate;	C00438	N-Carbamoyl-L-aspartate	3.5.2.3	dihydroorotase;	map00240	Pyrimidine metabolism	bbr	ssp	mxa	lil	hpa	lin	eco	son	ama	bba	bpa	bbr	gka	lpf	ngo	sme	cte	cli	tdn	aae	hth	nam
		x	C00311	Isocitrate;	C00417	cis-Aconitate;	4.2.1.3	aconitate hydratase;	map00020; map00630; map00720	Citrate cycle (TCA cycle); Glyoxylate and dicarboxylate metabolism; Reductive carboxylate cycle (CO2 fixation)	bbr	ssp	mxa	lil	hpa	lin	eco	son	ama	bba	bpa	bbr	gka	lpf	ngo	sme	cte	cli	tdn	aae	hth	nam
		x	C04620	(3R)-3-Hydroxyoctanoyl-[acyl-carrier protein];	C05750	3-Oxooctanoyl-[acp];	1.1.1.100	3-oxoacyl-[acyl-carrier-protein] reductase;	map00061	Fatty acid biosynthesis	bbr	ssp	mxa	lil	hpa	lin	eco	son	ama	bba	bpa	bbr	gka	lpf	ngo	sme	cte	cli	tdn	aae	hth	nam
		x	C00295	Orotate;	C00337	(S)-Dihydroorotate;	1.3.3.1	dihydroorotate oxidase;	map00240	Pyrimidine metabolism	bbr	ssp	mxa	lil	hpa	lin	eco	son	ama	bba	bpa	bbr	gka	lpf	ngo	sme	cte	cli	tdn	aae	hth	nam
		x	C00295	Orotate;	C01103	Orotidine 5'-phosphate;	2.4.2.10	orotate phosphoribosyltransferase;	map00240	Pyrimidine metabolism	bbr	ssp	mxa	lil	hpa	lin	eco	son	ama	bba	bpa	bbr	gka	lpf	ngo	sme	cte	cli	tdn	aae	hth	nam
		x	C00105	UMP;	C01103	Orotidine 5'-phosphate;	4.1.1.23	orotidine-5'-phosphate decarboxylase;	map00240	Pyrimidine metabolism	bbr	ssp	mxa	lil	hpa	lin	eco	son	ama	bba	bpa	bbr	gka	lpf	ngo	sme	cte	cli	tdn	aae	hth	nam
		x	C00015	UDP;	C00105	UMP;	2.7.4.14	cytidylate kinase;	map00240	Pyrimidine metabolism	bbr	ssp	mxa	lil		lin	eco	son	ama	bba	bpa	bbr	gka	lpf	ngo	sme	cte	cli		aae	hth
		x	C00015	UDP;	C00075	UTP;	2.7.4.6	nucleoside-diphosphate kinase;	map00240	Pyrimidine metabolism	bbr	ssp	mxa	lil	hpa	lin	eco	son	ama	bba	bpa	bbr	gka	lpf	ngo	sme	cte	cli	tdn	aae	hth	nam
		x	C00063	CTP;	C00075	UTP;	6.3.4.2	CTP synthase;	map00240	Pyrimidine metabolism	bbr	ssp	mxa	lil	hpa	lin	eco	son	ama	bba	bpa	bbr	gka	lpf	ngo	sme	cte	cli	tdn	aae	hth	nam
		x	C00063	CTP;	C00112	CDP;	2.7.4.6	nucleoside-diphosphate kinase;	map00240	Pyrimidine metabolism	bbr	ssp	mxa	lil	hpa	lin	eco	son	ama	bba	bpa	bbr	gka	lpf	ngo	sme	cte	cli	tdn	aae	hth	nam
		x	C00055	CMP;	C00112	CDP;	2.7.4.14	cytidylate kinase;	map00240	Pyrimidine metabolism	bbr	ssp	mxa	lil		lin	eco	son	ama	bba	bpa	bbr	gka	lpf	ngo	sme	cte	cli		aae	hth
		x	C00046	RNA;	C00063	CTP;	2.7.7.6	DNA-directed RNA polymerase;	map00240	Pyrimidine metabolism	bbr	ssp	mxa	lil	hpa	lin	eco	son	ama	bba	bpa	bbr	gka	lpf	ngo	sme	cte	cli	tdn	aae	hth	nam
		x	C00002	ATP;	C00046	RNA;	2.7.7.6	DNA-directed RNA polymerase;	map00230	Purine metabolism	bbr	ssp	mxa	lil	hpa	lin	eco	son	ama	bba	bpa	bbr	gka	lpf	ngo	sme	cte	cli	tdn	aae	hth	nam
		x	C00044	GTP;	C00046	RNA;	2.7.7.6	DNA-directed RNA polymerase;	map00230	Purine metabolism	bbr	ssp	mxa	lil	hpa	lin	eco	son	ama	bba	bpa	bbr	gka	lpf	ngo	sme	cte	cli	tdn	aae	hth	nam
		x	C00044	GTP;	C01304	2,5-Diamino-6-(5'-phosphoribosylamino)-4-pyrimidineone	3.5.4.25	GTP cyclohydrolase II;	map00740	Riboflavin metabolism	bbr	ssp	mxa	lil	hpa		eco	son	ama	bba	bpa	bbr	gka	lpf	ngo	sme	cte	cli	tdn	aae	hth	nam
		x	C00035	GDP;	C00044	GTP;	2.7.4.6	nucleoside-diphosphate kinase;	map00230	Purine metabolism	bbr	ssp	mxa	lil	hpa	lin	eco	son	ama	bba	bpa	bbr	gka	lpf	ngo	sme	cte	cli	tdn	aae	hth	nam
		x	C00035	GDP;	C00361	dGDP;	1.17.4.1	ribonucleoside-diphosphate reductase;	map00230	Purine metabolism	bbr	ssp	mxa	lil	hpa	lin	eco	son	ama	bba	bpa	bbr	gka	lpf	ngo	sme	cte	cli	tdn	aae	hth	nam
		x	C00035	GDP;	C00144	GMP;	2.7.4.8	guanylate kinase;	map00230	Purine metabolism	bbr	ssp	mxa	lil	hpa	lin	eco	son	ama	bba	bpa	bbr	gka	lpf	ngo	sme	cte	cli	tdn	aae	hth	nam
		x	C00286	dGTP;	C00361	dGDP;	2.7.4.6	nucleoside-diphosphate kinase;	map00230	Purine metabolism	bbr	ssp	mxa	lil	hpa	lin	eco	son	ama	bba	bpa	bbr	gka	lpf	ngo	sme	cte	cli	tdn	aae	hth	nam
		x	C00039	DNA;	C00286	dGTP;	2.7.7.7	DNA-directed DNA polymerase;	map00230	Purine metabolism	bbr	ssp	mxa	lil	hpa	lin	eco	son	ama	bba	bpa	bbr	gka	lpf	ngo	sme	cte	cli	tdn	aae	hth	nam
		x	C00039	DNA;	C00458	dCTP;	2.7.7.7	DNA-directed DNA polymerase;	map00240	Pyrimidine metabolism	bbr	ssp	mxa	lil	hpa	lin	eco	son	ama	bba	bpa	bbr	gka	lpf	ngo	sme	cte	cli	tdn	aae	hth	nam
		x	C00458	dCTP;	C00705	dCDP;	2.7.4.6	nucleoside-diphosphate kinase;	map00240	Pyrimidine metabolism	bbr	ssp	mxa	lil	hpa	lin	eco	son	ama	bba	bpa	bbr	gka	lpf	ngo	sme	cte	cli	tdn	aae	hth	nam
		x	C00239	dCMP;	C00705	dCDP;	2.7.4.14	cytidylate kinase;	map00240	Pyrimidine metabolism	bbr	ssp	mxa	lil		lin	eco	son	ama	bba	bpa	bbr	gka	lpf	ngo	sme	cte	cli		aae	hth
		x	C00039	DNA;	C00459	dTTP;	2.7.7.7	DNA-directed DNA polymerase;	map00240	Pyrimidine metabolism	bbr	ssp	mxa	lil	hpa	lin	eco	son	ama	bba	bpa	bbr	gka	lpf	ngo	sme	cte	cli	tdn	aae	hth	nam
		x	C00363	dTDP;	C00459	dTTP;	2.7.4.6	nucleoside-diphosphate kinase;	map00240	Pyrimidine metabolism	bbr	ssp	mxa	lil	hpa	lin	eco	son	ama	bba	bpa	bbr	gka	lpf	ngo	sme	cte	cli	tdn	aae	hth	nam
		x	C00363	dTDP;	C00364	dTMP;	2.7.4.9	dTMP kinase;	map00240	Pyrimidine metabolism	bbr	ssp	mxa	lil	hpa	lin	eco	son	ama	bba	bpa	bbr	gka	lpf	ngo	sme	cte	cli	tdn	aae	hth	nam
		x	C00039	DNA;	C00131	dATP;	2.7.7.7	DNA-directed DNA polymerase;	map00230	Purine metabolism	bbr	ssp	mxa	lil	hpa	lin	eco	son	ama	bba	bpa	bbr	gka	lpf	ngo	sme	cte	cli	tdn	aae	hth	nam
		x	C00119	5-Phospho-alpha-D-ribose 1-diphosphate;	C01103	Orotidine 5'-phosphate;	2.4.2.10	orotate phosphoribosyltransferase;	map00240	Pyrimidine metabolism	bbr	ssp	mxa	lil	hpa	lin	eco	son	ama	bba	bpa	bbr	gka	lpf	ngo	sme	cte	cli	tdn	aae	hth	nam
		x	C00119	5-Phospho-alpha-D-ribose 1-diphosphate;	C03090	5-Phosphoribosylamine;	2.4.2.14	amidophosphoribosyltransferase;	map00230	Purine metabolism	bbr	ssp	mxa	lil		lin	eco	son	ama	bba	bpa	bbr	gka	lpf	ngo	sme	cte	cli	tdn	aae	hth	nam
		x	C00117	D-Ribose 5-phosphate;	C00119	5-Phospho-alpha-D-ribose 1-diphosphate;	2.7.6.1	ribose-phosphate diphosphokinase;	map00030; map00230	Pentose phosphate pathway; Purine metabolism	bbr	ssp	mxa	lil	hpa	lin	eco	son	ama	bba	bpa	bbr	gka	lpf	ngo	sme	cte	cli	tdn	aae	hth	nam
		x	C03090	5-Phosphoribosylamine;	C03838	5'-Phosphoribosylglycinamide;	6.3.4.13	phosphoribosylamine---glycine ligase;	map00230	Purine metabolism	bbr	ssp	mxa	lil	hpa	lin	eco	son	ama	bba	bpa	bbr	gka	lpf	ngo	sme	cte	cli	tdn	aae	hth	nam
		x	C00117	D-Ribose 5-phosphate;	C00118	D-Glyceraldehyde 3-phosphate;	2.2.1.1	transketolase;	map00030; map00710	Pentose phosphate pathway; Carbon fixation in photosynthetic organisms	bbr	ssp	mxa	lil	hpa	lin	eco	son	ama	bba	bpa	bbr	gka	lpf	ngo	sme	cte	cli	tdn	aae	hth	nam
		x	C00118	D-Glyceraldehyde 3-phosphate;	C00231	D-Xylulose 5-phosphate	2.2.1.1	transketolase;	map00030; map00710	Pentose phosphate pathway; Carbon fixation in photosynthetic organisms	bbr	ssp	mxa	lil	hpa	lin	eco	son	ama	bba	bpa	bbr	gka	lpf	ngo	sme	cte	cli	tdn	aae	hth	nam
		x	C00199	D-Ribulose 5-phosphate	C00231	D-Xylulose 5-phosphate	5.1.3.1	ribulose-phosphate 3-epimerase;	map00030; map00040; map00710	Pentose phosphate pathway; Pentose and glucuronate interconversions; Carbon fixation in photosynthetic organisms	bbr	ssp	mxa	lil	hpa	lin	eco	son	ama	bba	bpa	bbr	gka	lpf	ngo	sme	cte	cli	tdn	aae	hth	nam
		x	C00231	D-Xylulose 5-phosphate	C05345	beta-D-Fructose 6-phosphate	2.2.1.1	transketolase;	map00030	Pentose phosphate pathway	bbr	ssp	mxa	lil	hpa	lin	eco	son	ama	bba	bpa	bbr	gka	lpf	ngo	sme	cte	cli	tdn	aae	hth	nam
		x	C00118	D-Glyceraldehyde 3-phosphate;	C00236	3-Phospho-D-glyceroyl phosphate;	1.2.1.12	glyceraldehyde-3-phosphate dehydrogenase (phosphorylating);	map00010	Glycolysis / Gluconeogenesis	bbr	ssp	mxa	lil	hpa	lin	eco	son	ama	bba	bpa	bbr	gka	lpf	ngo	sme	cte	cli	tdn	aae	hth	nam
		x	C00231	D-Xylulose 5-phosphate	C05382	Sedoheptulose 7-phosphate;	2.2.1.1	transketolase;	map00030; map00710	Pentose phosphate pathway; Carbon fixation in photosynthetic organisms	bbr	ssp	mxa	lil	hpa	lin	eco	son	ama	bba	bpa	bbr	gka	lpf	ngo	sme	cte	cli	tdn	aae	hth	nam
		x	C00118	D-Glyceraldehyde 3-phosphate;	C00279	D-Erythrose 4-phosphate	2.2.1.1	transketolase;	map00030; map00710	Pentose phosphate pathway; Carbon fixation in photosynthetic organisms	bbr	ssp	mxa	lil	hpa	lin	eco	son	ama	bba	bpa	bbr	gka	lpf	ngo	sme	cte	cli	tdn	aae	hth	nam
		x	C00197	3-Phospho-D-glycerate;	C00236	3-Phospho-D-glyceroyl phosphate;	2.7.2.3	phosphoglycerate kinase;	map00010; map00710	Glycolysis / Gluconeogenesis; Carbon fixation in photosynthetic organisms	bbr	ssp	mxa	lil	hpa	lin	eco	son	ama	bba	bpa	bbr	gka	lpf	ngo	sme	cte	cli	tdn	aae	hth	nam
		x	C00197	3-Phospho-D-glycerate;	C00631	2-Phospho-D-glycerate;	5.4.2.1	phosphoglycerate mutase;	map00010	Glycolysis / Gluconeogenesis	bbr	ssp	mxa	lil	hpa	lin	eco	son	ama	bba	bpa	bbr	gka	lpf	ngo	sme	cte	cli	tdn	aae	hth	nam
		x	C00118	D-Glyceraldehyde 3-phosphate;	C05378	beta-D-Fructose 1,6-bisphosphate	4.1.2.13	fructose-bisphosphate aldolase;	map00010; map00030; map00051	Glycolysis / Gluconeogenesis; Pentose phosphate pathway; Fructose and mannose metabolism	bbr	ssp	mxa	lil	hpa	lin	eco	son	ama	bba	bpa	bbr	gka	lpf	ngo	sme	cte	cli	tdn	aae	hth	nam
		x	C00361	dGDP;	C00362	dGMP;	2.7.4.8	guanylate kinase;	map00230	Purine metabolism	bbr	ssp	mxa	lil	hpa	lin	eco	son	ama	bba	bpa	bbr	gka	lpf	ngo	sme	cte	cli	tdn	aae	hth	nam
		x	C00131	dATP;	C00206	dADP;	2.7.4.6	nucleoside-diphosphate kinase;	map00230	Purine metabolism	bbr	ssp	mxa	lil	hpa	lin	eco	son	ama	bba	bpa	bbr	gka	lpf	ngo	sme	cte	cli	tdn	aae	hth	nam
		x	C00206	dADP;	C00360	dAMP;	2.7.4.3	adenylate kinase;	map00230	Purine metabolism	bbr	ssp	mxa	lil	hpa	lin	eco	son	ama	bba	bpa	bbr	gka	lpf	ngo	sme	cte	cli	tdn	aae	hth	nam
		x	C00008	ADP;	C00206	dADP;	1.17.4.1	ribonucleoside-diphosphate reductase;	map00230	Purine metabolism	bbr	ssp	mxa	lil	hpa	lin	eco	son	ama	bba	bpa	bbr	gka	lpf	ngo	sme	cte	cli	tdn	aae	hth	nam
		x	C01268	5-Amino-6-(5'-phosphoribosylamino)uracil;	C01304	2,5-Diamino-6-(5'-phosphoribosylamino)-4-pyrimidineone	3.5.4.26	diaminohydroxyphosphoribosylaminopyrimidine deaminase	map00740	Riboflavin metabolism	bbr	ssp	mxa	lil	hpa		eco	son	ama	bba	bpa	bbr	gka	lpf	ngo	sme	cte	cli	tdn	aae	hth	nam
		x	C01268	5-Amino-6-(5'-phosphoribosylamino)uracil;	C04454	5-Amino-6-(5'-phosphoribitylamino)uracil;	1.1.1.193	5-amino-6-(5-phosphoribosylamino)uracil reductase;	map00740	Riboflavin metabolism	bbr	ssp	mxa	lil	hpa		eco	son	ama	bba	bpa	bbr	gka	lpf	ngo	sme	cte	cli	tdn	aae	hth	nam
		x	C00279	D-Erythrose 4-phosphate	C05345	beta-D-Fructose 6-phosphate	2.2.1.1	transketolase;	map00030	Pentose phosphate pathway	bbr	ssp	mxa	lil	hpa	lin	eco	son	ama	bba	bpa	bbr	gka	lpf	ngo	sme	cte	cli	tdn	aae	hth	nam
		x	C00144	GMP;	C00655	Xanthosine 5'-phosphate;	6.3.5.2	GMP synthase (glutamine-hydrolysing);	map00230	Purine metabolism	bbr	ssp	mxa	lil	hpa	lin	eco	son	ama	bba	bpa	bbr	gka	lpf	ngo	sme	cte	cli	tdn	aae	hth	nam
		x	C00130	IMP;	C00655	Xanthosine 5'-phosphate;	1.1.1.205	IMP dehydrogenase;	map00230	Purine metabolism	bbr	ssp	mxa	lil	hpa	lin	eco	son	ama	bba	bpa	bbr	gka	lpf	ngo	sme	cte	cli	tdn	aae	hth	nam
		x	C00130	IMP;	C04734	1-(5'-Phosphoribosyl)-5-formamido-4-imidazolecarboxamide;	3.5.4.10	IMP cyclohydrolase;	map00230	Purine metabolism	bbr	ssp	mxa	lil		lin	eco	son	ama	bba	bpa	bbr	gka	lpf	ngo	sme	cte	cli	tdn	aae	hth	nam
		x	C04677	1-(5'-Phosphoribosyl)-5-amino-4-imidazolecarboxamide;	C04734	1-(5'-Phosphoribosyl)-5-formamido-4-imidazolecarboxamide;	6.3.4.-	<Ligases; Forming carbon-nitrogen bonds; Other carbon--nitrogen ligases>	map00230	Purine metabolism	bbr	ssp	mxa	lil	hpa	lin	eco	son	ama	bba	bpa	bbr	gka	lpf	ngo	sme	cte	cli	tdn	aae	hth	nam
		x	C04677	1-(5'-Phosphoribosyl)-5-amino-4-imidazolecarboxamide;	C04823	1-(5'-Phosphoribosyl)-5-amino-4-(N-succinocarboxamide)-imidazole;	4.3.2.2	adenylosuccinate lyase;	map00230	Purine metabolism	bbr	ssp	mxa	lil	hpa	lin	eco	son	ama	bba	bpa	bbr	gka	lpf	ngo	sme	cte	cli	tdn	aae	hth	nam
		x	C04751	1-(5-Phospho-D-ribosyl)-5-amino-4-imidazolecarboxylate;	C04823	1-(5'-Phosphoribosyl)-5-amino-4-(N-succinocarboxamide)-imidazole;	6.3.2.6	phosphoribosylaminoimidazolesuccinocarboxamide synthase;	map00230	Purine metabolism	bbr	ssp	mxa	lil		lin	eco	son	ama	bba	bpa	bbr	gka	lpf	ngo	sme	cte	cli	tdn	aae	hth	nam
		x	C04751	1-(5-Phospho-D-ribosyl)-5-amino-4-imidazolecarboxylate;	C15667	5-Carboxyamino-1-(5-phospho-D-ribosyl)imidazole	5.4.99.18	5-(carboxyamino)imidazole ribonucleotide mutase;	map00230	Purine metabolism	bbr	ssp	mxa	lil		lin	eco	son	ama	bba	bpa	bbr	gka	lpf	ngo	sme	cte	cli	tdn	aae	hth	nam
		x	C00130	IMP;	C04734	1-(5'-Phosphoribosyl)-5-formamido-4-imidazolecarboxamide;	2.1.2.3	phosphoribosylaminoimidazolecarboxamide formyltransferase;	map00230	Purine metabolism	bbr	ssp	mxa	lil		lin	eco	son	ama	bba	bpa	bbr	gka	lpf	ngo	sme	cte	cli	tdn	aae	hth	nam
		x	C00130	IMP;	C03794	N6-(1,2-Dicarboxyethyl)-AMP;	6.3.4.4	adenylosuccinate synthase;	map00230	Purine metabolism	bbr	ssp	mxa	lil	hpa	lin	eco	son	ama	bba	bpa	bbr	gka	lpf	ngo	sme	cte	cli	tdn	aae	hth	nam
		x	C00020	AMP;	C03794	N6-(1,2-Dicarboxyethyl)-AMP;	4.3.2.2	adenylosuccinate lyase;	map00230	Purine metabolism	bbr	ssp	mxa	lil	hpa	lin	eco	son	ama	bba	bpa	bbr	gka	lpf	ngo	sme	cte	cli	tdn	aae	hth	nam
		x	C04677	1-(5'-Phosphoribosyl)-5-amino-4-imidazolecarboxamide;	C04734	1-(5'-Phosphoribosyl)-5-formamido-4-imidazolecarboxamide;	2.1.2.3	phosphoribosylaminoimidazolecarboxamide formyltransferase;	map00230	Purine metabolism	bbr	ssp	mxa	lil		lin	eco	son	ama	bba	bpa	bbr	gka	lpf	ngo	sme	cte	cli	tdn	aae	hth	nam
		x	C00046	RNA;	C00075	UTP;	2.7.7.6	DNA-directed RNA polymerase;	map00240	Pyrimidine metabolism	bbr	ssp	mxa	lil	hpa	lin	eco	son	ama	bba	bpa	bbr	gka	lpf	ngo	sme	cte	cli	tdn	aae	hth	nam
		x	C00074	Phosphoenolpyruvate;	C00631	2-Phospho-D-glycerate;	4.2.1.11	phosphopyruvate hydratase;	map00010	Glycolysis / Gluconeogenesis	bbr	ssp	mxa	lil	hpa	lin	eco	son	ama	bba	bpa	bbr	gka	lpf	ngo	sme	cte	cli	tdn	aae	hth	nam
		x	C00002	ATP;	C00008	ADP;	2.7.4.6	nucleoside-diphosphate kinase;	map00230	Purine metabolism	bbr	ssp	mxa	lil	hpa	lin	eco	son	ama	bba	bpa	bbr	gka	lpf	ngo	sme	cte	cli	tdn	aae	hth	nam
		x	C00111	Glycerone phosphate;	C00118	D-Glyceraldehyde 3-phosphate;	5.3.1.1	triose-phosphate isomerase;	map00010; map00051; map00562; map00710	Glycolysis / Gluconeogenesis; Fructose and mannose metabolism; Inositol phosphate metabolism; Carbon fixation in photosynthetic organisms	bbr	ssp	mxa	lil	hpa	lin	eco	son	ama	bba	bpa	bbr	gka	lpf	ngo	sme	cte	cli	tdn	aae	hth	nam
		x	C00111	Glycerone phosphate;	C01094	D-Fructose 1-phosphate	4.1.2.13	fructose-bisphosphate aldolase;	map00051	Fructose and mannose metabolism	bbr	ssp	mxa	lil	hpa	lin	eco	son	ama	bba	bpa	bbr	gka	lpf	ngo	sme	cte	cli	tdn	aae	hth	nam
		x	C00117	D-Ribose 5-phosphate;	C05382	Sedoheptulose 7-phosphate;	2.2.1.1	transketolase;	map00030; map00710	Pentose phosphate pathway; Carbon fixation in photosynthetic organisms	bbr	ssp	mxa	lil	hpa	lin	eco	son	ama	bba	bpa	bbr	gka	lpf	ngo	sme	cte	cli	tdn	aae	hth	nam
		x	C00008	ADP;	C00020	AMP;	2.7.4.3	adenylate kinase;	map00230	Purine metabolism	bbr	ssp	mxa	lil	hpa	lin	eco	son	ama	bba	bpa	bbr	gka	lpf	ngo	sme	cte	cli	tdn	aae	hth	nam
		x	C00111	Glycerone phosphate;	C05378	beta-D-Fructose 1,6-bisphosphate	4.1.2.13	fructose-bisphosphate aldolase;	map00010; map00051	Glycolysis / Gluconeogenesis; Fructose and mannose metabolism	bbr	ssp	mxa	lil	hpa	lin	eco	son	ama	bba	bpa	bbr	gka	lpf	ngo	sme	cte	cli	tdn	aae	hth	nam
		x	C00352	D-Glucosamine 6-phosphate;	C05345	beta-D-Fructose 6-phosphate	2.6.1.16	glutamine---fructose-6-phosphate transaminase (isomerizing);	map00520	Amino sugar and nucleotide sugar metabolism	bbr	ssp	mxa	lil	hpa	lin	eco	son	ama	bba	bpa	bbr	gka	lpf	ngo	sme	cte	cli	tdn	aae	hth	nam
		x	C00352	D-Glucosamine 6-phosphate;	C06156	alpha-D-Glucosamine 1-phosphate;	5.4.2.10	phosphoglucosamine mutase	map00520	Amino sugar and nucleotide sugar metabolism	bbr	ssp	mxa		hpa	lin	eco	son	ama	bba	bpa	bbr	gka	lpf	ngo	sme			tdn			nam
		x	C00112	CDP;	C00705	dCDP;	1.17.4.1	ribonucleoside-diphosphate reductase;	map00240	Pyrimidine metabolism	bbr	ssp	mxa	lil	hpa	lin	eco	son	ama	bba	bpa	bbr	gka	lpf	ngo	sme	cte	cli	tdn	aae	hth	nam
		x	C04501	N-Acetyl-alpha-D-glucosamine 1-phosphate	C06156	alpha-D-Glucosamine 1-phosphate;	2.3.1.157	glucosamine-1-phosphate N-acetyltransferase	map00520	Amino sugar and nucleotide sugar metabolism	bbr	ssp	mxa		hpa	lin	eco	son	ama	bba	bpa	bbr	gka	lpf	ngo	sme			tdn	aae	hth	nam
		x	C00043	UDP-N-acetyl-D-glucosamine;	C04501	N-Acetyl-alpha-D-glucosamine 1-phosphate	2.7.7.23	UDP-N-acetylglucosamine diphosphorylase;	map00520	Amino sugar and nucleotide sugar metabolism	bbr	ssp	mxa	lil	hpa	lin	eco	son	ama	bba	bpa	bbr	gka	lpf	ngo	sme	cte	cli	tdn	aae	hth	nam
		x	C00043	UDP-N-acetyl-D-glucosamine;	C04631	UDP-N-acetyl-3-(1-carboxyvinyl)-D-glucosamine;	2.5.1.7	UDP-N-acetylglucosamine 1-carboxyvinyltransferase;	map00520; map00550	Amino sugar and nucleotide sugar metabolism; Peptidoglycan biosynthesis	bbr	ssp	mxa	lil	hpa	lin	eco	son	ama	bba	bpa	bbr	gka	lpf	ngo	sme	cte	cli	tdn	aae	hth	nam
		x	C01050	UDP-N-acetylmuramate;	C04631	UDP-N-acetyl-3-(1-carboxyvinyl)-D-glucosamine;	1.1.1.158	UDP-N-acetylmuramate dehydrogenase;	map00520; map00550	Amino sugar and nucleotide sugar metabolism; Peptidoglycan biosynthesis	bbr	ssp	mxa	lil	hpa	lin	eco	son	ama	bba	bpa	bbr	gka	lpf	ngo	sme	cte	cli	tdn	aae	hth	nam
		x	C01050	UDP-N-acetylmuramate;	C01212	UDP-N-acetylmuramoyl-L-alanine	6.3.2.8	UDP-N-acetylmuramate---L-alanine ligase;	map00471; map00550	D-Glutamine and D-glutamate metabolism; Peptidoglycan biosynthesis	bbr	ssp	mxa	lil	hpa	lin	eco	son	ama	bba	bpa	bbr	gka	lpf	ngo	sme	cte	cli	tdn	aae	hth	nam
		x	C00692	UDP-N-acetylmuramoyl-L-alanyl-D-glutamate	C01212	UDP-N-acetylmuramoyl-L-alanine	6.3.2.9	UDP-N-acetylmuramoyl-L-alanine---D-glutamate ligase;	map00471; map00550	D-Glutamine and D-glutamate metabolism; Peptidoglycan biosynthesis	bbr	ssp	mxa	lil	hpa	lin	eco	son	ama	bba	bpa	bbr	gka	lpf	ngo	sme	cte	cli	tdn	aae	hth	nam
		x	C00117	D-Ribose 5-phosphate;	C00199	D-Ribulose 5-phosphate	5.3.1.6	ribose-5-phosphate isomerase;	map00030; map00710	Pentose phosphate pathway; Carbon fixation in photosynthetic organisms	bbr	ssp	mxa	lil	hpa	lin	eco	son	ama	bba	bpa	bbr	gka	lpf	ngo	sme	cte	cli	tdn	aae	hth	nam
		x	C03838	5'-Phosphoribosylglycinamide;	C04376	5'-Phosphoribosyl-N-formylglycinamide;	2.1.2.2	phosphoribosylglycinamide formyltransferase;	map00230	Purine metabolism	bbr	ssp	mxa	lil		lin	eco	son	ama	bba	bpa	bbr	gka	lpf	ngo	sme	cte	cli	tdn	aae	hth	nam
		x	C04376	5'-Phosphoribosyl-N-formylglycinamide;	C04640	2-(Formamido)-N1-(5'-phosphoribosyl)acetamidine;	6.3.5.3	phosphoribosylformylglycinamidine synthase;	map00230	Purine metabolism	bbr	ssp	mxa	lil		lin	eco	son	ama	bba	bpa	bbr	gka	lpf	ngo	sme	cte	cli	tdn	aae	hth	nam
		x	C03373	Aminoimidazole ribotide;	C04640	2-(Formamido)-N1-(5'-phosphoribosyl)acetamidine;	6.3.3.1	phosphoribosylformylglycinamidine cyclo-ligase;	map00230	Purine metabolism	bbr	ssp	mxa	lil		lin	eco	son	ama	bba	bpa	bbr	gka	lpf	ngo	sme	cte	cli	tdn	aae	hth	nam
		x	C05761	Tetradecanoyl-[acp];	C05762	3-Oxohexadecanoyl-[acp];	2.3.1.179	beta-ketoacyl-acyl-carrier-protein synthase II;	map00061	Fatty acid biosynthesis	bbr	ssp	mxa	lil	hpa	lin	eco	son	ama	bba	bpa	bbr	gka	lpf	ngo	sme	cte	cli	tdn	aae	hth	nam
		x	C04618	(3R)-3-Hydroxybutanoyl-[acyl-carrier protein];	C05744	Acetoacetyl-[acp];	1.1.1.100	3-oxoacyl-[acyl-carrier-protein] reductase;	map00061	Fatty acid biosynthesis	bbr	ssp	mxa	lil	hpa	lin	eco	son	ama	bba	bpa	bbr	gka	lpf	ngo	sme	cte	cli	tdn	aae	hth	nam
Subsystem 47	0.006191950464396287										bbr	ssp	mxa				eco	son		bba	bpa	bbr	gka	lpf		sme
		i	C00025	L-Glutamate;	C03912	(S)-1-Pyrroline-5-carboxylate;	1.5.1.12	1-pyrroline-5-carboxylate dehydrogenase;	map00250; map00330	Alanine, aspartate and glutamate metabolism; Arginine and proline metabolism	bbr	ssp	mxa		hpa		eco	son	ama	bba	bpa	bbr	gka	lpf		sme			tdn
		s	C00154	Palmitoyl-CoA;	C00249	Hexadecanoic acid;	6.2.1.3	long-chain-fatty-acid---CoA ligase;	map00071	Fatty acid metabolism	bbr	ssp	mxa	lil			eco	son		bba	bpa	bbr	gka	lpf	ngo	sme	cte	cli		aae		nam
		x	C00025	L-Glutamate;	C00064	L-Glutamine;	6.3.1.2	glutamate---ammonia ligase;	map00250; map00330; map00910	Alanine, aspartate and glutamate metabolism; Arginine and proline metabolism; Nitrogen metabolism	bbr	ssp	mxa	lil	hpa	lin	eco	son	ama	bba	bpa	bbr	gka	lpf	ngo	sme	cte	cli	tdn	aae	hth	nam
		x	C00064	L-Glutamine;	C00169	Carbamoyl phosphate	6.3.5.5	carbamoyl-phosphate synthase (glutamine-hydrolysing);	map00240; map00250	Pyrimidine metabolism; Alanine, aspartate and glutamate metabolism	bbr	ssp	mxa	lil	hpa	lin	eco	son	ama	bba	bpa	bbr	gka	lpf	ngo	sme	cte	cli	tdn	aae	hth	nam
		x	C00169	Carbamoyl phosphate	C00438	N-Carbamoyl-L-aspartate	2.1.3.2	aspartate carbamoyltransferase;	map00240; map00250	Pyrimidine metabolism; Alanine, aspartate and glutamate metabolism	bbr	ssp	mxa	lil	hpa	lin	eco	son	ama	bba	bpa	bbr	gka	lpf	ngo	sme	cte	cli	tdn	aae	hth	nam
		x	C00337	(S)-Dihydroorotate;	C00438	N-Carbamoyl-L-aspartate	3.5.2.3	dihydroorotase;	map00240	Pyrimidine metabolism	bbr	ssp	mxa	lil	hpa	lin	eco	son	ama	bba	bpa	bbr	gka	lpf	ngo	sme	cte	cli	tdn	aae	hth	nam
		x	C00295	Orotate;	C00337	(S)-Dihydroorotate;	1.3.3.1	dihydroorotate oxidase;	map00240	Pyrimidine metabolism	bbr	ssp	mxa	lil	hpa	lin	eco	son	ama	bba	bpa	bbr	gka	lpf	ngo	sme	cte	cli	tdn	aae	hth	nam
		x	C00249	Hexadecanoic acid;	C05764	Hexadecanoyl-[acp];	2.3.1.-	<Transferases; Acyltransferases; Transferring groups other than amino-acyl groups>	map00061; map01040	Fatty acid biosynthesis; Biosynthesis of unsaturated fatty acids	bbr	ssp	mxa	lil	hpa	lin	eco	son		bba	bpa	bbr	gka	lpf	ngo	sme	cte	cli	tdn	aae	hth	nam
		x	C05763	trans-Hexadec-2-enoyl-[acp];	C05764	Hexadecanoyl-[acp];	2.3.1.-	<Transferases; Acyltransferases; Transferring groups other than amino-acyl groups>	map00061	Fatty acid biosynthesis	bbr	ssp	mxa	lil	hpa	lin	eco	son		bba	bpa	bbr	gka	lpf	ngo	sme	cte	cli	tdn	aae	hth	nam
		x	C04633	(3R)-3-Hydroxypalmitoyl-[acyl-carrier protein];	C05763	trans-Hexadec-2-enoyl-[acp];	2.3.1.-	<Transferases; Acyltransferases; Transferring groups other than amino-acyl groups>	map00061	Fatty acid biosynthesis	bbr	ssp	mxa	lil	hpa	lin	eco	son		bba	bpa	bbr	gka	lpf	ngo	sme	cte	cli	tdn	aae	hth	nam
		x	C04633	(3R)-3-Hydroxypalmitoyl-[acyl-carrier protein];	C05762	3-Oxohexadecanoyl-[acp];	2.3.1.-	<Transferases; Acyltransferases; Transferring groups other than amino-acyl groups>	map00061	Fatty acid biosynthesis	bbr	ssp	mxa	lil	hpa	lin	eco	son		bba	bpa	bbr	gka	lpf	ngo	sme	cte	cli	tdn	aae	hth	nam
		x	C01209	Malonyl-[acyl-carrier protein]	C05762	3-Oxohexadecanoyl-[acp];	2.3.1.-	<Transferases; Acyltransferases; Transferring groups other than amino-acyl groups>	map00061	Fatty acid biosynthesis	bbr	ssp	mxa	lil	hpa	lin	eco	son		bba	bpa	bbr	gka	lpf	ngo	sme	cte	cli	tdn	aae	hth	nam
		x	C01209	Malonyl-[acyl-carrier protein]	C05750	3-Oxooctanoyl-[acp];	2.3.1.-	<Transferases; Acyltransferases; Transferring groups other than amino-acyl groups>	map00061	Fatty acid biosynthesis	bbr	ssp	mxa	lil	hpa	lin	eco	son		bba	bpa	bbr	gka	lpf	ngo	sme	cte	cli	tdn	aae	hth	nam
		x	C01209	Malonyl-[acyl-carrier protein]	C05753	3-Oxodecanoyl-[acp];	2.3.1.-	<Transferases; Acyltransferases; Transferring groups other than amino-acyl groups>	map00061	Fatty acid biosynthesis	bbr	ssp	mxa	lil	hpa	lin	eco	son		bba	bpa	bbr	gka	lpf	ngo	sme	cte	cli	tdn	aae	hth	nam
		x	C05752	Octanoyl-[acp];	C05753	3-Oxodecanoyl-[acp];	2.3.1.179	beta-ketoacyl-acyl-carrier-protein synthase II;	map00061	Fatty acid biosynthesis	bbr	ssp	mxa	lil	hpa	lin	eco	son	ama	bba	bpa	bbr	gka	lpf	ngo	sme	cte	cli	tdn	aae	hth	nam
		x	C01209	Malonyl-[acyl-carrier protein]	C05744	Acetoacetyl-[acp];	2.3.1.-	<Transferases; Acyltransferases; Transferring groups other than amino-acyl groups>	map00061	Fatty acid biosynthesis	bbr	ssp	mxa	lil	hpa	lin	eco	son		bba	bpa	bbr	gka	lpf	ngo	sme	cte	cli	tdn	aae	hth	nam
		x	C03939	Acetyl-[acyl-carrier protein]	C05744	Acetoacetyl-[acp];	2.3.1.-	<Transferases; Acyltransferases; Transferring groups other than amino-acyl groups>	map00061	Fatty acid biosynthesis	bbr	ssp	mxa	lil	hpa	lin	eco	son		bba	bpa	bbr	gka	lpf	ngo	sme	cte	cli	tdn	aae	hth	nam
		x	C00024	Acetyl-CoA;	C03939	Acetyl-[acyl-carrier protein]	2.3.1.-	<Transferases; Acyltransferases; Transferring groups other than amino-acyl groups>	map00061	Fatty acid biosynthesis	bbr	ssp	mxa	lil	hpa	lin	eco	son		bba	bpa	bbr	gka	lpf	ngo	sme	cte	cli	tdn	aae	hth	nam
		x	C00024	Acetyl-CoA;	C03939	Acetyl-[acyl-carrier protein]	2.3.1.180	beta-ketoacyl-acyl-carrier-protein synthase III;	map00061	Fatty acid biosynthesis	bbr	ssp	mxa	lil	hpa	lin	eco	son	ama	bba	bpa	bbr	gka	lpf	ngo	sme	cte	cli	tdn	aae	hth	nam
		x	C01209	Malonyl-[acyl-carrier protein]	C05753	3-Oxodecanoyl-[acp];	2.3.1.179	beta-ketoacyl-acyl-carrier-protein synthase II;	map00061	Fatty acid biosynthesis	bbr	ssp	mxa	lil	hpa	lin	eco	son	ama	bba	bpa	bbr	gka	lpf	ngo	sme	cte	cli	tdn	aae	hth	nam
		x	C04620	(3R)-3-Hydroxyoctanoyl-[acyl-carrier protein];	C05750	3-Oxooctanoyl-[acp];	2.3.1.-	<Transferases; Acyltransferases; Transferring groups other than amino-acyl groups>	map00061	Fatty acid biosynthesis	bbr	ssp	mxa	lil	hpa	lin	eco	son		bba	bpa	bbr	gka	lpf	ngo	sme	cte	cli	tdn	aae	hth	nam
		x	C04620	(3R)-3-Hydroxyoctanoyl-[acyl-carrier protein];	C05751	trans-Oct-2-enoyl-[acp];	2.3.1.-	<Transferases; Acyltransferases; Transferring groups other than amino-acyl groups>	map00061	Fatty acid biosynthesis	bbr	ssp	mxa	lil	hpa	lin	eco	son		bba	bpa	bbr	gka	lpf	ngo	sme	cte	cli	tdn	aae	hth	nam
		x	C01209	Malonyl-[acyl-carrier protein]	C05759	3-Oxotetradecanoyl-[acp];	2.3.1.179	beta-ketoacyl-acyl-carrier-protein synthase II;	map00061	Fatty acid biosynthesis	bbr	ssp	mxa	lil	hpa	lin	eco	son	ama	bba	bpa	bbr	gka	lpf	ngo	sme	cte	cli	tdn	aae	hth	nam
		x	C04688	(3R)-3-Hydroxytetradecanoyl-[acyl-carrier protein];	C05759	3-Oxotetradecanoyl-[acp];	2.3.1.-	<Transferases; Acyltransferases; Transferring groups other than amino-acyl groups>	map00061	Fatty acid biosynthesis	bbr	ssp	mxa	lil	hpa	lin	eco	son		bba	bpa	bbr	gka	lpf	ngo	sme	cte	cli	tdn	aae	hth	nam
		x	C05223	Dodecanoyl-[acyl-carrier protein];	C05759	3-Oxotetradecanoyl-[acp];	2.3.1.179	beta-ketoacyl-acyl-carrier-protein synthase II;	map00061	Fatty acid biosynthesis	bbr	ssp	mxa	lil	hpa	lin	eco	son	ama	bba	bpa	bbr	gka	lpf	ngo	sme	cte	cli	tdn	aae	hth	nam
		x	C01209	Malonyl-[acyl-carrier protein]	C05759	3-Oxotetradecanoyl-[acp];	2.3.1.-	<Transferases; Acyltransferases; Transferring groups other than amino-acyl groups>	map00061	Fatty acid biosynthesis	bbr	ssp	mxa	lil	hpa	lin	eco	son		bba	bpa	bbr	gka	lpf	ngo	sme	cte	cli	tdn	aae	hth	nam
		x	C05749	Hexanoyl-[acp];	C05750	3-Oxooctanoyl-[acp];	2.3.1.179	beta-ketoacyl-acyl-carrier-protein synthase II;	map00061	Fatty acid biosynthesis	bbr	ssp	mxa	lil	hpa	lin	eco	son	ama	bba	bpa	bbr	gka	lpf	ngo	sme	cte	cli	tdn	aae	hth	nam
		x	C05748	trans-Hex-2-enoyl-[acp];	C05749	Hexanoyl-[acp];	2.3.1.-	<Transferases; Acyltransferases; Transferring groups other than amino-acyl groups>	map00061	Fatty acid biosynthesis	bbr	ssp	mxa	lil	hpa	lin	eco	son		bba	bpa	bbr	gka	lpf	ngo	sme	cte	cli	tdn	aae	hth	nam
		x	C03939	Acetyl-[acyl-carrier protein]	C05744	Acetoacetyl-[acp];	2.3.1.179	beta-ketoacyl-acyl-carrier-protein synthase II;	map00061	Fatty acid biosynthesis	bbr	ssp	mxa	lil	hpa	lin	eco	son	ama	bba	bpa	bbr	gka	lpf	ngo	sme	cte	cli	tdn	aae	hth	nam
		x	C03939	Acetyl-[acyl-carrier protein]	C05744	Acetoacetyl-[acp];	2.3.1.180	beta-ketoacyl-acyl-carrier-protein synthase III;	map00061	Fatty acid biosynthesis	bbr	ssp	mxa	lil	hpa	lin	eco	son	ama	bba	bpa	bbr	gka	lpf	ngo	sme	cte	cli	tdn	aae	hth	nam
		x	C01209	Malonyl-[acyl-carrier protein]	C05756	3-Oxododecanoyl-[acp];	2.3.1.179	beta-ketoacyl-acyl-carrier-protein synthase II;	map00061	Fatty acid biosynthesis	bbr	ssp	mxa	lil	hpa	lin	eco	son	ama	bba	bpa	bbr	gka	lpf	ngo	sme	cte	cli	tdn	aae	hth	nam
		x	C05755	Decanoyl-[acp];	C05756	3-Oxododecanoyl-[acp];	2.3.1.179	beta-ketoacyl-acyl-carrier-protein synthase II;	map00061	Fatty acid biosynthesis	bbr	ssp	mxa	lil	hpa	lin	eco	son	ama	bba	bpa	bbr	gka	lpf	ngo	sme	cte	cli	tdn	aae	hth	nam
		x	C05754	trans-Dec-2-enoyl-[acp];	C05755	Decanoyl-[acp];	2.3.1.-	<Transferases; Acyltransferases; Transferring groups other than amino-acyl groups>	map00061	Fatty acid biosynthesis	bbr	ssp	mxa	lil	hpa	lin	eco	son		bba	bpa	bbr	gka	lpf	ngo	sme	cte	cli	tdn	aae	hth	nam
		x	C05756	3-Oxododecanoyl-[acp];	C05757	(R)-3-Hydroxydodecanoyl-[acp];	2.3.1.-	<Transferases; Acyltransferases; Transferring groups other than amino-acyl groups>	map00061	Fatty acid biosynthesis	bbr	ssp	mxa	lil	hpa	lin	eco	son		bba	bpa	bbr	gka	lpf	ngo	sme	cte	cli	tdn	aae	hth	nam
		x	C05757	(R)-3-Hydroxydodecanoyl-[acp];	C05758	trans-Dodec-2-enoyl-[acp];	2.3.1.-	<Transferases; Acyltransferases; Transferring groups other than amino-acyl groups>	map00061	Fatty acid biosynthesis	bbr	ssp	mxa	lil	hpa	lin	eco	son		bba	bpa	bbr	gka	lpf	ngo	sme	cte	cli	tdn	aae	hth	nam
		x	C05749	Hexanoyl-[acp];	C05750	3-Oxooctanoyl-[acp];	2.3.1.-	<Transferases; Acyltransferases; Transferring groups other than amino-acyl groups>	map00061	Fatty acid biosynthesis	bbr	ssp	mxa	lil	hpa	lin	eco	son		bba	bpa	bbr	gka	lpf	ngo	sme	cte	cli	tdn	aae	hth	nam
		x	C00083	Malonyl-CoA;	C01209	Malonyl-[acyl-carrier protein]	2.3.1.39	[acyl-carrier-protein] S-malonyltransferase;	map00061	Fatty acid biosynthesis	bbr	ssp	mxa		hpa	lin	eco	son	ama	bba	bpa	bbr	gka	lpf	ngo	sme	cte	cli	tdn	aae	hth	nam
		x	C01209	Malonyl-[acyl-carrier protein]	C05746	3-Oxohexanoyl-[acp];	2.3.1.-	<Transferases; Acyltransferases; Transferring groups other than amino-acyl groups>	map00061	Fatty acid biosynthesis	bbr	ssp	mxa	lil	hpa	lin	eco	son		bba	bpa	bbr	gka	lpf	ngo	sme	cte	cli	tdn	aae	hth	nam
		x	C05746	3-Oxohexanoyl-[acp];	C05747	(R)-3-Hydroxyhexanoyl-[acp];	1.1.1.100	3-oxoacyl-[acyl-carrier-protein] reductase;	map00061	Fatty acid biosynthesis	bbr	ssp	mxa	lil	hpa	lin	eco	son	ama	bba	bpa	bbr	gka	lpf	ngo	sme	cte	cli	tdn	aae	hth	nam
		x	C05755	Decanoyl-[acp];	C05756	3-Oxododecanoyl-[acp];	2.3.1.-	<Transferases; Acyltransferases; Transferring groups other than amino-acyl groups>	map00061	Fatty acid biosynthesis	bbr	ssp	mxa	lil	hpa	lin	eco	son		bba	bpa	bbr	gka	lpf	ngo	sme	cte	cli	tdn	aae	hth	nam
		x	C00024	Acetyl-CoA;	C00332	Acetoacetyl-CoA;	2.3.1.9	acetyl-CoA C-acetyltransferase;	map00071; map00072; map00280; map00310; map00380; map00620; map00632; map00640; map00650; map00900	Fatty acid metabolism; Synthesis and degradation of ketone bodies; Valine, leucine and isoleucine degradation; Lysine degradation; Tryptophan metabolism; Pyruvate metabolism; Benzoate degradation via CoA ligation; Propanoate metabolism; Butanoate metabolism; Terpenoid backbone biosynthesis	bbr	ssp	mxa	lil	hpa	lin	eco	son		bba	bpa	bbr	gka	lpf		sme
		x	C05747	(R)-3-Hydroxyhexanoyl-[acp];	C05748	trans-Hex-2-enoyl-[acp];	2.3.1.-	<Transferases; Acyltransferases; Transferring groups other than amino-acyl groups>	map00061	Fatty acid biosynthesis	bbr	ssp	mxa	lil	hpa	lin	eco	son		bba	bpa	bbr	gka	lpf	ngo	sme	cte	cli	tdn	aae	hth	nam
		x	C00022	Pyruvate;	C00024	Acetyl-CoA;	2.3.1.12	dihydrolipoyllysine-residue acetyltransferase;	map00010; map00020; map00620	Glycolysis / Gluconeogenesis; Citrate cycle (TCA cycle); Pyruvate metabolism	bbr	ssp	mxa	lil		lin	eco	son	ama	bba	bpa	bbr	gka	lpf	ngo	sme					hth	nam
		x	C01209	Malonyl-[acyl-carrier protein]	C05746	3-Oxohexanoyl-[acp];	2.3.1.179	beta-ketoacyl-acyl-carrier-protein synthase II;	map00061	Fatty acid biosynthesis	bbr	ssp	mxa	lil	hpa	lin	eco	son	ama	bba	bpa	bbr	gka	lpf	ngo	sme	cte	cli	tdn	aae	hth	nam
		x	C04688	(3R)-3-Hydroxytetradecanoyl-[acyl-carrier protein];	C05760	trans-Tetradec-2-enoyl-[acp];	2.3.1.-	<Transferases; Acyltransferases; Transferring groups other than amino-acyl groups>	map00061	Fatty acid biosynthesis	bbr	ssp	mxa	lil	hpa	lin	eco	son		bba	bpa	bbr	gka	lpf	ngo	sme	cte	cli	tdn	aae	hth	nam
		x	C05760	trans-Tetradec-2-enoyl-[acp];	C05761	Tetradecanoyl-[acp];	2.3.1.-	<Transferases; Acyltransferases; Transferring groups other than amino-acyl groups>	map00061	Fatty acid biosynthesis	bbr	ssp	mxa	lil	hpa	lin	eco	son		bba	bpa	bbr	gka	lpf	ngo	sme	cte	cli	tdn	aae	hth	nam
		x	C05751	trans-Oct-2-enoyl-[acp];	C05752	Octanoyl-[acp];	2.3.1.-	<Transferases; Acyltransferases; Transferring groups other than amino-acyl groups>	map00061	Fatty acid biosynthesis	bbr	ssp	mxa	lil	hpa	lin	eco	son		bba	bpa	bbr	gka	lpf	ngo	sme	cte	cli	tdn	aae	hth	nam
		x	C00022	Pyruvate;	C05125	2-(alpha-Hydroxyethyl)thiamine diphosphate;	1.2.4.1	pyruvate dehydrogenase (acetyl-transferring);	map00010; map00020; map00290; map00620; map00650	Glycolysis / Gluconeogenesis; Citrate cycle (TCA cycle); Valine, leucine and isoleucine biosynthesis; Pyruvate metabolism; Butanoate metabolism	bbr	ssp	mxa	lil		lin	eco	son	ama	bba	bpa	bbr	gka	lpf	ngo	sme					hth	nam
		x	C01209	Malonyl-[acyl-carrier protein]	C05744	Acetoacetyl-[acp];	2.3.1.179	beta-ketoacyl-acyl-carrier-protein synthase II;	map00061	Fatty acid biosynthesis	bbr	ssp	mxa	lil	hpa	lin	eco	son	ama	bba	bpa	bbr	gka	lpf	ngo	sme	cte	cli	tdn	aae	hth	nam
		x	C00022	Pyruvate;	C00074	Phosphoenolpyruvate;	2.7.1.40	pyruvate kinase;	map00010; map00620; map00710	Glycolysis / Gluconeogenesis; Pyruvate metabolism; Carbon fixation in photosynthetic organisms	bbr	ssp	mxa	lil		lin	eco	son		bba	bpa	bbr	gka	lpf	ngo	sme						nam
		x	C01209	Malonyl-[acyl-carrier protein]	C05756	3-Oxododecanoyl-[acp];	2.3.1.-	<Transferases; Acyltransferases; Transferring groups other than amino-acyl groups>	map00061	Fatty acid biosynthesis	bbr	ssp	mxa	lil	hpa	lin	eco	son		bba	bpa	bbr	gka	lpf	ngo	sme	cte	cli	tdn	aae	hth	nam
		x	C01209	Malonyl-[acyl-carrier protein]	C05750	3-Oxooctanoyl-[acp];	2.3.1.179	beta-ketoacyl-acyl-carrier-protein synthase II;	map00061	Fatty acid biosynthesis	bbr	ssp	mxa	lil	hpa	lin	eco	son	ama	bba	bpa	bbr	gka	lpf	ngo	sme	cte	cli	tdn	aae	hth	nam
		x	C00024	Acetyl-CoA;	C00158	Citrate;	2.3.3.1	citrate (Si)-synthase;	map00020; map00630	Citrate cycle (TCA cycle); Glyoxylate and dicarboxylate metabolism	bbr	ssp	mxa	lil	hpa	lin	eco	son	ama	bba	bpa	bbr	gka	lpf	ngo	sme	cte	cli	tdn	aae	hth
		x	C00158	Citrate;	C00417	cis-Aconitate;	4.2.1.3	aconitate hydratase;	map00020; map00630; map00720	Citrate cycle (TCA cycle); Glyoxylate and dicarboxylate metabolism; Reductive carboxylate cycle (CO2 fixation)	bbr	ssp	mxa	lil	hpa	lin	eco	son	ama	bba	bpa	bbr	gka	lpf	ngo	sme	cte	cli	tdn	aae	hth	nam
		x	C00022	Pyruvate;	C00024	Acetyl-CoA;	1.8.1.4	dihydrolipoyl dehydrogenase;	map00010; map00020; map00620	Glycolysis / Gluconeogenesis; Citrate cycle (TCA cycle); Pyruvate metabolism	bbr	ssp	mxa	lil		lin	eco	son	ama	bba	bpa	bbr	gka	lpf	ngo	sme	cte	cli		aae	hth	nam
		x	C00036	Oxaloacetate;	C00158	Citrate;	2.3.3.1	citrate (Si)-synthase;	map00020; map00630	Citrate cycle (TCA cycle); Glyoxylate and dicarboxylate metabolism	bbr	ssp	mxa	lil	hpa	lin	eco	son	ama	bba	bpa	bbr	gka	lpf	ngo	sme	cte	cli	tdn	aae	hth
		x	C00036	Oxaloacetate;	C00149	(S)-Malate;	1.1.1.37	malate dehydrogenase;	map00020; map00620; map00630; map00710; map00720	Citrate cycle (TCA cycle); Pyruvate metabolism; Glyoxylate and dicarboxylate metabolism; Carbon fixation in photosynthetic organisms; Reductive carboxylate cycle (CO2 fixation)	bbr	ssp	mxa	lil			eco	son	ama	bba	bpa	bbr	gka	lpf		sme	cte	cli	tdn	aae	hth	nam
		x	C00122	Fumarate;	C00149	(S)-Malate;	4.2.1.2	fumarate hydratase;	map00020; map00720	Citrate cycle (TCA cycle); Reductive carboxylate cycle (CO2 fixation)	bbr	ssp	mxa	lil	hpa	lin	eco	son	ama	bba	bpa	bbr	gka	lpf	ngo	sme	cte	cli	tdn	aae	hth	nam
		x	C00042	Succinate;	C00122	Fumarate;	1.3.99.1	succinate dehydrogenase;	map00020; map00190; map00632; map00650; map00720	Citrate cycle (TCA cycle); Oxidative phosphorylation; Benzoate degradation via CoA ligation; Butanoate metabolism; Reductive carboxylate cycle (CO2 fixation)	bbr	ssp	mxa	lil	hpa	lin	eco	son	ama	bba	bpa	bbr	gka	lpf	ngo	sme	cte	cli	tdn	aae	hth	nam
		x	C00042	Succinate;	C00091	Succinyl-CoA;	6.2.1.5	succinate---CoA ligase (ADP-forming);	map00020; map00640; map00720	Citrate cycle (TCA cycle); Propanoate metabolism; Reductive carboxylate cycle (CO2 fixation)	bbr	ssp	mxa	lil			eco	son	ama	bba	bpa	bbr	gka	lpf	ngo	sme	cte	cli	tdn	aae	hth	nam
		x	C01209	Malonyl-[acyl-carrier protein]	C05744	Acetoacetyl-[acp];	2.3.1.180	beta-ketoacyl-acyl-carrier-protein synthase III;	map00061	Fatty acid biosynthesis	bbr	ssp	mxa	lil	hpa	lin	eco	son	ama	bba	bpa	bbr	gka	lpf	ngo	sme	cte	cli	tdn	aae	hth	nam
		x	C05746	3-Oxohexanoyl-[acp];	C05747	(R)-3-Hydroxyhexanoyl-[acp];	2.3.1.-	<Transferases; Acyltransferases; Transferring groups other than amino-acyl groups>	map00061	Fatty acid biosynthesis	bbr	ssp	mxa	lil	hpa	lin	eco	son		bba	bpa	bbr	gka	lpf	ngo	sme	cte	cli	tdn	aae	hth	nam
		x	C00022	Pyruvate;	C00024	Acetyl-CoA;	1.2.4.1	pyruvate dehydrogenase (acetyl-transferring);	map00010; map00020; map00290; map00620; map00650	Glycolysis / Gluconeogenesis; Citrate cycle (TCA cycle); Valine, leucine and isoleucine biosynthesis; Pyruvate metabolism; Butanoate metabolism	bbr	ssp	mxa	lil		lin	eco	son	ama	bba	bpa	bbr	gka	lpf	ngo	sme					hth	nam
		x	C04619	(3R)-3-Hydroxydecanoyl-[acyl-carrier protein];	C05753	3-Oxodecanoyl-[acp];	1.1.1.100	3-oxoacyl-[acyl-carrier-protein] reductase;	map00061	Fatty acid biosynthesis	bbr	ssp	mxa	lil	hpa	lin	eco	son	ama	bba	bpa	bbr	gka	lpf	ngo	sme	cte	cli	tdn	aae	hth	nam
		x	C00074	Phosphoenolpyruvate;	C04691	2-Dehydro-3-deoxy-D-arabino-heptonate 7-phosphate;	2.5.1.54	3-deoxy-7-phosphoheptulonate synthase;	map00400	Phenylalanine, tyrosine and tryptophan biosynthesis	bbr	ssp	mxa	lil	hpa	lin	eco	son		bba	bpa	bbr	gka	lpf	ngo	sme	cte	cli	tdn			nam
		x	C00944	3-Dehydroquinate;	C04691	2-Dehydro-3-deoxy-D-arabino-heptonate 7-phosphate;	4.2.3.4	3-dehydroquinate synthase;	map00400	Phenylalanine, tyrosine and tryptophan biosynthesis	bbr	ssp	mxa	lil	hpa	lin	eco	son		bba	bpa	bbr	gka	lpf	ngo	sme	cte	cli	tdn			nam
		x	C00279	D-Erythrose 4-phosphate	C04691	2-Dehydro-3-deoxy-D-arabino-heptonate 7-phosphate;	2.5.1.54	3-deoxy-7-phosphoheptulonate synthase;	map00400	Phenylalanine, tyrosine and tryptophan biosynthesis	bbr	ssp	mxa	lil	hpa	lin	eco	son		bba	bpa	bbr	gka	lpf	ngo	sme	cte	cli	tdn			nam
		x	C00118	D-Glyceraldehyde 3-phosphate;	C00279	D-Erythrose 4-phosphate	2.2.1.1	transketolase;	map00030; map00710	Pentose phosphate pathway; Carbon fixation in photosynthetic organisms	bbr	ssp	mxa	lil	hpa	lin	eco	son	ama	bba	bpa	bbr	gka	lpf	ngo	sme	cte	cli	tdn	aae	hth	nam
		x	C00118	D-Glyceraldehyde 3-phosphate;	C00231	D-Xylulose 5-phosphate	2.2.1.1	transketolase;	map00030; map00710	Pentose phosphate pathway; Carbon fixation in photosynthetic organisms	bbr	ssp	mxa	lil	hpa	lin	eco	son	ama	bba	bpa	bbr	gka	lpf	ngo	sme	cte	cli	tdn	aae	hth	nam
		x	C00199	D-Ribulose 5-phosphate	C00231	D-Xylulose 5-phosphate	5.1.3.1	ribulose-phosphate 3-epimerase;	map00030; map00040; map00710	Pentose phosphate pathway; Pentose and glucuronate interconversions; Carbon fixation in photosynthetic organisms	bbr	ssp	mxa	lil	hpa	lin	eco	son	ama	bba	bpa	bbr	gka	lpf	ngo	sme	cte	cli	tdn	aae	hth	nam
		x	C00231	D-Xylulose 5-phosphate	C05345	beta-D-Fructose 6-phosphate	2.2.1.1	transketolase;	map00030	Pentose phosphate pathway	bbr	ssp	mxa	lil	hpa	lin	eco	son	ama	bba	bpa	bbr	gka	lpf	ngo	sme	cte	cli	tdn	aae	hth	nam
		x	C00668	alpha-D-Glucose 6-phosphate	C05345	beta-D-Fructose 6-phosphate	5.3.1.9	glucose-6-phosphate isomerase;	map00010; map00030; map00500; map00520	Glycolysis / Gluconeogenesis; Pentose phosphate pathway; Starch and sucrose metabolism; Amino sugar and nucleotide sugar metabolism	bbr	ssp	mxa	lil	hpa	lin	eco	son		bba	bpa	bbr	gka	lpf	ngo	sme	cte	cli	tdn	aae	hth	nam
		x	C00118	D-Glyceraldehyde 3-phosphate;	C00236	3-Phospho-D-glyceroyl phosphate;	1.2.1.12	glyceraldehyde-3-phosphate dehydrogenase (phosphorylating);	map00010	Glycolysis / Gluconeogenesis	bbr	ssp	mxa	lil	hpa	lin	eco	son	ama	bba	bpa	bbr	gka	lpf	ngo	sme	cte	cli	tdn	aae	hth	nam
		x	C00231	D-Xylulose 5-phosphate	C05382	Sedoheptulose 7-phosphate;	2.2.1.1	transketolase;	map00030; map00710	Pentose phosphate pathway; Carbon fixation in photosynthetic organisms	bbr	ssp	mxa	lil	hpa	lin	eco	son	ama	bba	bpa	bbr	gka	lpf	ngo	sme	cte	cli	tdn	aae	hth	nam
		x	C00668	alpha-D-Glucose 6-phosphate	C01172	beta-D-Glucose 6-phosphate	5.3.1.9	glucose-6-phosphate isomerase;	map00010; map00030; map00500	Glycolysis / Gluconeogenesis; Pentose phosphate pathway; Starch and sucrose metabolism	bbr	ssp	mxa	lil	hpa	lin	eco	son		bba	bpa	bbr	gka	lpf	ngo	sme	cte	cli	tdn	aae	hth	nam
		x	C00197	3-Phospho-D-glycerate;	C00236	3-Phospho-D-glyceroyl phosphate;	2.7.2.3	phosphoglycerate kinase;	map00010; map00710	Glycolysis / Gluconeogenesis; Carbon fixation in photosynthetic organisms	bbr	ssp	mxa	lil	hpa	lin	eco	son	ama	bba	bpa	bbr	gka	lpf	ngo	sme	cte	cli	tdn	aae	hth	nam
		x	C00197	3-Phospho-D-glycerate;	C00631	2-Phospho-D-glycerate;	5.4.2.1	phosphoglycerate mutase;	map00010	Glycolysis / Gluconeogenesis	bbr	ssp	mxa	lil	hpa	lin	eco	son	ama	bba	bpa	bbr	gka	lpf	ngo	sme	cte	cli	tdn	aae	hth	nam
		x	C00197	3-Phospho-D-glycerate;	C03232	3-Phosphonooxypyruvate;	1.1.1.95	phosphoglycerate dehydrogenase;	map00260	Glycine, serine and threonine metabolism	bbr	ssp	mxa	lil	hpa	lin	eco	son		bba	bpa	bbr	gka	lpf		sme		cli	tdn	aae	hth	nam
		x	C01172	beta-D-Glucose 6-phosphate	C05345	beta-D-Fructose 6-phosphate	5.3.1.9	glucose-6-phosphate isomerase;	map00010; map00030; map00500	Glycolysis / Gluconeogenesis; Pentose phosphate pathway; Starch and sucrose metabolism	bbr	ssp	mxa	lil	hpa	lin	eco	son		bba	bpa	bbr	gka	lpf	ngo	sme	cte	cli	tdn	aae	hth	nam
		x	C00118	D-Glyceraldehyde 3-phosphate;	C05378	beta-D-Fructose 1,6-bisphosphate	4.1.2.13	fructose-bisphosphate aldolase;	map00010; map00030; map00051	Glycolysis / Gluconeogenesis; Pentose phosphate pathway; Fructose and mannose metabolism	bbr	ssp	mxa	lil	hpa	lin	eco	son	ama	bba	bpa	bbr	gka	lpf	ngo	sme	cte	cli	tdn	aae	hth	nam
		x	C00117	D-Ribose 5-phosphate;	C00118	D-Glyceraldehyde 3-phosphate;	2.2.1.1	transketolase;	map00030; map00710	Pentose phosphate pathway; Carbon fixation in photosynthetic organisms	bbr	ssp	mxa	lil	hpa	lin	eco	son	ama	bba	bpa	bbr	gka	lpf	ngo	sme	cte	cli	tdn	aae	hth	nam
		x	C00117	D-Ribose 5-phosphate;	C00119	5-Phospho-alpha-D-ribose 1-diphosphate;	2.7.6.1	ribose-phosphate diphosphokinase;	map00030; map00230	Pentose phosphate pathway; Purine metabolism	bbr	ssp	mxa	lil	hpa	lin	eco	son	ama	bba	bpa	bbr	gka	lpf	ngo	sme	cte	cli	tdn	aae	hth	nam
		x	C00119	5-Phospho-alpha-D-ribose 1-diphosphate;	C03090	5-Phosphoribosylamine;	2.4.2.14	amidophosphoribosyltransferase;	map00230	Purine metabolism	bbr	ssp	mxa	lil		lin	eco	son	ama	bba	bpa	bbr	gka	lpf	ngo	sme	cte	cli	tdn	aae	hth	nam
		x	C03090	5-Phosphoribosylamine;	C03838	5'-Phosphoribosylglycinamide;	6.3.4.13	phosphoribosylamine---glycine ligase;	map00230	Purine metabolism	bbr	ssp	mxa	lil	hpa	lin	eco	son	ama	bba	bpa	bbr	gka	lpf	ngo	sme	cte	cli	tdn	aae	hth	nam
		x	C01209	Malonyl-[acyl-carrier protein]	C05762	3-Oxohexadecanoyl-[acp];	2.3.1.179	beta-ketoacyl-acyl-carrier-protein synthase II;	map00061	Fatty acid biosynthesis	bbr	ssp	mxa	lil	hpa	lin	eco	son	ama	bba	bpa	bbr	gka	lpf	ngo	sme	cte	cli	tdn	aae	hth	nam
		x	C04619	(3R)-3-Hydroxydecanoyl-[acyl-carrier protein];	C05754	trans-Dec-2-enoyl-[acp];	2.3.1.-	<Transferases; Acyltransferases; Transferring groups other than amino-acyl groups>	map00061	Fatty acid biosynthesis	bbr	ssp	mxa	lil	hpa	lin	eco	son		bba	bpa	bbr	gka	lpf	ngo	sme	cte	cli	tdn	aae	hth	nam
		x	C00119	5-Phospho-alpha-D-ribose 1-diphosphate;	C01103	Orotidine 5'-phosphate;	2.4.2.10	orotate phosphoribosyltransferase;	map00240	Pyrimidine metabolism	bbr	ssp	mxa	lil	hpa	lin	eco	son	ama	bba	bpa	bbr	gka	lpf	ngo	sme	cte	cli	tdn	aae	hth	nam
		x	C00105	UMP;	C01103	Orotidine 5'-phosphate;	4.1.1.23	orotidine-5'-phosphate decarboxylase;	map00240	Pyrimidine metabolism	bbr	ssp	mxa	lil	hpa	lin	eco	son	ama	bba	bpa	bbr	gka	lpf	ngo	sme	cte	cli	tdn	aae	hth	nam
		x	C00105	UMP;	C00106	Uracil	2.4.2.9	uracil phosphoribosyltransferase;	map00240	Pyrimidine metabolism	bbr	ssp	mxa			lin	eco	son		bba	bpa	bbr	gka	lpf	ngo	sme				aae
		x	C00015	UDP;	C00105	UMP;	2.7.4.14	cytidylate kinase;	map00240	Pyrimidine metabolism	bbr	ssp	mxa	lil		lin	eco	son	ama	bba	bpa	bbr	gka	lpf	ngo	sme	cte	cli		aae	hth
		x	C00015	UDP;	C00075	UTP;	2.7.4.6	nucleoside-diphosphate kinase;	map00240	Pyrimidine metabolism	bbr	ssp	mxa	lil	hpa	lin	eco	son	ama	bba	bpa	bbr	gka	lpf	ngo	sme	cte	cli	tdn	aae	hth	nam
		x	C00063	CTP;	C00075	UTP;	6.3.4.2	CTP synthase;	map00240	Pyrimidine metabolism	bbr	ssp	mxa	lil	hpa	lin	eco	son	ama	bba	bpa	bbr	gka	lpf	ngo	sme	cte	cli	tdn	aae	hth	nam
		x	C00063	CTP;	C00112	CDP;	2.7.4.6	nucleoside-diphosphate kinase;	map00240	Pyrimidine metabolism	bbr	ssp	mxa	lil	hpa	lin	eco	son	ama	bba	bpa	bbr	gka	lpf	ngo	sme	cte	cli	tdn	aae	hth	nam
		x	C00055	CMP;	C00112	CDP;	2.7.4.14	cytidylate kinase;	map00240	Pyrimidine metabolism	bbr	ssp	mxa	lil		lin	eco	son	ama	bba	bpa	bbr	gka	lpf	ngo	sme	cte	cli		aae	hth
		x	C00046	RNA;	C00063	CTP;	2.7.7.6	DNA-directed RNA polymerase;	map00240	Pyrimidine metabolism	bbr	ssp	mxa	lil	hpa	lin	eco	son	ama	bba	bpa	bbr	gka	lpf	ngo	sme	cte	cli	tdn	aae	hth	nam
		x	C00002	ATP;	C00046	RNA;	2.7.7.6	DNA-directed RNA polymerase;	map00230	Purine metabolism	bbr	ssp	mxa	lil	hpa	lin	eco	son	ama	bba	bpa	bbr	gka	lpf	ngo	sme	cte	cli	tdn	aae	hth	nam
		x	C00044	GTP;	C00046	RNA;	2.7.7.6	DNA-directed RNA polymerase;	map00230	Purine metabolism	bbr	ssp	mxa	lil	hpa	lin	eco	son	ama	bba	bpa	bbr	gka	lpf	ngo	sme	cte	cli	tdn	aae	hth	nam
		x	C00044	GTP;	C01304	2,5-Diamino-6-(5'-phosphoribosylamino)-4-pyrimidineone	3.5.4.25	GTP cyclohydrolase II;	map00740	Riboflavin metabolism	bbr	ssp	mxa	lil	hpa		eco	son	ama	bba	bpa	bbr	gka	lpf	ngo	sme	cte	cli	tdn	aae	hth	nam
		x	C00035	GDP;	C00044	GTP;	2.7.4.6	nucleoside-diphosphate kinase;	map00230	Purine metabolism	bbr	ssp	mxa	lil	hpa	lin	eco	son	ama	bba	bpa	bbr	gka	lpf	ngo	sme	cte	cli	tdn	aae	hth	nam
		x	C00035	GDP;	C00361	dGDP;	1.17.4.1	ribonucleoside-diphosphate reductase;	map00230	Purine metabolism	bbr	ssp	mxa	lil	hpa	lin	eco	son	ama	bba	bpa	bbr	gka	lpf	ngo	sme	cte	cli	tdn	aae	hth	nam
		x	C00286	dGTP;	C00361	dGDP;	2.7.1.40	pyruvate kinase;	map00230	Purine metabolism	bbr	ssp	mxa	lil		lin	eco	son		bba	bpa	bbr	gka	lpf	ngo	sme						nam
		x	C00039	DNA;	C00286	dGTP;	2.7.7.7	DNA-directed DNA polymerase;	map00230	Purine metabolism	bbr	ssp	mxa	lil	hpa	lin	eco	son	ama	bba	bpa	bbr	gka	lpf	ngo	sme	cte	cli	tdn	aae	hth	nam
		x	C00039	DNA;	C00458	dCTP;	2.7.7.7	DNA-directed DNA polymerase;	map00240	Pyrimidine metabolism	bbr	ssp	mxa	lil	hpa	lin	eco	son	ama	bba	bpa	bbr	gka	lpf	ngo	sme	cte	cli	tdn	aae	hth	nam
		x	C00458	dCTP;	C00705	dCDP;	2.7.4.6	nucleoside-diphosphate kinase;	map00240	Pyrimidine metabolism	bbr	ssp	mxa	lil	hpa	lin	eco	son	ama	bba	bpa	bbr	gka	lpf	ngo	sme	cte	cli	tdn	aae	hth	nam
		x	C00239	dCMP;	C00705	dCDP;	2.7.4.14	cytidylate kinase;	map00240	Pyrimidine metabolism	bbr	ssp	mxa	lil		lin	eco	son	ama	bba	bpa	bbr	gka	lpf	ngo	sme	cte	cli		aae	hth
		x	C00039	DNA;	C00459	dTTP;	2.7.7.7	DNA-directed DNA polymerase;	map00240	Pyrimidine metabolism	bbr	ssp	mxa	lil	hpa	lin	eco	son	ama	bba	bpa	bbr	gka	lpf	ngo	sme	cte	cli	tdn	aae	hth	nam
		x	C00363	dTDP;	C00459	dTTP;	2.7.4.6	nucleoside-diphosphate kinase;	map00240	Pyrimidine metabolism	bbr	ssp	mxa	lil	hpa	lin	eco	son	ama	bba	bpa	bbr	gka	lpf	ngo	sme	cte	cli	tdn	aae	hth	nam
		x	C00363	dTDP;	C00364	dTMP;	2.7.4.9	dTMP kinase;	map00240	Pyrimidine metabolism	bbr	ssp	mxa	lil	hpa	lin	eco	son	ama	bba	bpa	bbr	gka	lpf	ngo	sme	cte	cli	tdn	aae	hth	nam
		x	C00035	GDP;	C00144	GMP;	2.7.4.8	guanylate kinase;	map00230	Purine metabolism	bbr	ssp	mxa	lil	hpa	lin	eco	son	ama	bba	bpa	bbr	gka	lpf	ngo	sme	cte	cli	tdn	aae	hth	nam
		x	C00286	dGTP;	C00361	dGDP;	2.7.4.6	nucleoside-diphosphate kinase;	map00230	Purine metabolism	bbr	ssp	mxa	lil	hpa	lin	eco	son	ama	bba	bpa	bbr	gka	lpf	ngo	sme	cte	cli	tdn	aae	hth	nam
		x	C00364	dTMP;	C00365	dUMP;	2.1.1.45	thymidylate synthase;	map00240	Pyrimidine metabolism	bbr	ssp	mxa	lil		lin	eco	son		bba	bpa	bbr	gka	lpf	ngo	sme
		x	C00365	dUMP;	C01346	dUDP;	2.7.4.9	dTMP kinase;	map00240	Pyrimidine metabolism	bbr	ssp	mxa	lil	hpa	lin	eco	son	ama	bba	bpa	bbr	gka	lpf	ngo	sme	cte	cli	tdn	aae	hth	nam
		x	C00460	dUTP;	C01346	dUDP;	2.7.4.6	nucleoside-diphosphate kinase;	map00240	Pyrimidine metabolism	bbr	ssp	mxa	lil	hpa	lin	eco	son	ama	bba	bpa	bbr	gka	lpf	ngo	sme	cte	cli	tdn	aae	hth	nam
		x	C00039	DNA;	C00131	dATP;	2.7.7.7	DNA-directed DNA polymerase;	map00230	Purine metabolism	bbr	ssp	mxa	lil	hpa	lin	eco	son	ama	bba	bpa	bbr	gka	lpf	ngo	sme	cte	cli	tdn	aae	hth	nam
		x	C00131	dATP;	C00206	dADP;	2.7.1.40	pyruvate kinase;	map00230	Purine metabolism	bbr	ssp	mxa	lil		lin	eco	son		bba	bpa	bbr	gka	lpf	ngo	sme						nam
		x	C00206	dADP;	C00360	dAMP;	2.7.4.3	adenylate kinase;	map00230	Purine metabolism	bbr	ssp	mxa	lil	hpa	lin	eco	son	ama	bba	bpa	bbr	gka	lpf	ngo	sme	cte	cli	tdn	aae	hth	nam
		x	C00008	ADP;	C00206	dADP;	1.17.4.1	ribonucleoside-diphosphate reductase;	map00230	Purine metabolism	bbr	ssp	mxa	lil	hpa	lin	eco	son	ama	bba	bpa	bbr	gka	lpf	ngo	sme	cte	cli	tdn	aae	hth	nam
		x	C04633	(3R)-3-Hydroxypalmitoyl-[acyl-carrier protein];	C05762	3-Oxohexadecanoyl-[acp];	1.1.1.100	3-oxoacyl-[acyl-carrier-protein] reductase;	map00061	Fatty acid biosynthesis	bbr	ssp	mxa	lil	hpa	lin	eco	son	ama	bba	bpa	bbr	gka	lpf	ngo	sme	cte	cli	tdn	aae	hth	nam
		x	C00361	dGDP;	C00362	dGMP;	2.7.4.8	guanylate kinase;	map00230	Purine metabolism	bbr	ssp	mxa	lil	hpa	lin	eco	son	ama	bba	bpa	bbr	gka	lpf	ngo	sme	cte	cli	tdn	aae	hth	nam
		x	C05756	3-Oxododecanoyl-[acp];	C05757	(R)-3-Hydroxydodecanoyl-[acp];	1.1.1.100	3-oxoacyl-[acyl-carrier-protein] reductase;	map00061	Fatty acid biosynthesis	bbr	ssp	mxa	lil	hpa	lin	eco	son	ama	bba	bpa	bbr	gka	lpf	ngo	sme	cte	cli	tdn	aae	hth	nam
		x	C04618	(3R)-3-Hydroxybutanoyl-[acyl-carrier protein];	C05744	Acetoacetyl-[acp];	2.3.1.-	<Transferases; Acyltransferases; Transferring groups other than amino-acyl groups>	map00061	Fatty acid biosynthesis	bbr	ssp	mxa	lil	hpa	lin	eco	son		bba	bpa	bbr	gka	lpf	ngo	sme	cte	cli	tdn	aae	hth	nam
		x	C04246	But-2-enoyl-[acyl-carrier protein]	C04618	(3R)-3-Hydroxybutanoyl-[acyl-carrier protein];	2.3.1.-	<Transferases; Acyltransferases; Transferring groups other than amino-acyl groups>	map00061	Fatty acid biosynthesis	bbr	ssp	mxa	lil	hpa	lin	eco	son		bba	bpa	bbr	gka	lpf	ngo	sme	cte	cli	tdn	aae	hth	nam
		x	C04246	But-2-enoyl-[acyl-carrier protein]	C05745	Butyryl-[acp];	2.3.1.-	<Transferases; Acyltransferases; Transferring groups other than amino-acyl groups>	map00061	Fatty acid biosynthesis	bbr	ssp	mxa	lil	hpa	lin	eco	son		bba	bpa	bbr	gka	lpf	ngo	sme	cte	cli	tdn	aae	hth	nam
		x	C00332	Acetoacetyl-CoA;	C01144	(S)-3-Hydroxybutanoyl-CoA;	1.1.1.35	3-hydroxyacyl-CoA dehydrogenase;	map00071; map00310; map00380; map00632; map00650	Fatty acid metabolism; Lysine degradation; Tryptophan metabolism; Benzoate degradation via CoA ligation; Butanoate metabolism	bbr	ssp	mxa				eco	son		bba	bpa	bbr	gka	lpf		sme
		x	C00877	Crotonoyl-CoA;	C01144	(S)-3-Hydroxybutanoyl-CoA;	4.2.1.17	enoyl-CoA hydratase;	map00071; map00310; map00380; map00632; map00650	Fatty acid metabolism; Lysine degradation; Tryptophan metabolism; Benzoate degradation via CoA ligation; Butanoate metabolism	bbr	ssp	mxa	lil			eco	son		bba	bpa	bbr	gka	lpf		sme
		x	C00136	Butanoyl-CoA;	C00877	Crotonoyl-CoA;	1.3.99.-	<Oxidoreductases; Acting on the CH-CH group of donors; With other acceptors>	map00071	Fatty acid metabolism	bbr	ssp	mxa				eco	son		bba	bpa	bbr	gka	lpf	ngo	sme
		x	C00131	dATP;	C00206	dADP;	2.7.4.6	nucleoside-diphosphate kinase;	map00230	Purine metabolism	bbr	ssp	mxa	lil	hpa	lin	eco	son	ama	bba	bpa	bbr	gka	lpf	ngo	sme	cte	cli	tdn	aae	hth	nam
		x	C00352	D-Glucosamine 6-phosphate;	C05345	beta-D-Fructose 6-phosphate	3.5.1.-	<Hydrolases; Acting on carbon-nitrogen bonds, other than peptide bonds; In linear amides>	map00520	Amino sugar and nucleotide sugar metabolism	bbr	ssp	mxa	lil	hpa	lin	eco	son		bba	bpa	bbr	gka	lpf	ngo	sme	cte	cli	tdn	aae	hth	nam
		x	C00352	D-Glucosamine 6-phosphate;	C06156	alpha-D-Glucosamine 1-phosphate;	5.4.2.10	phosphoglucosamine mutase	map00520	Amino sugar and nucleotide sugar metabolism	bbr	ssp	mxa		hpa	lin	eco	son	ama	bba	bpa	bbr	gka	lpf	ngo	sme			tdn			nam
		x	C05745	Butyryl-[acp];	C05746	3-Oxohexanoyl-[acp];	2.3.1.179	beta-ketoacyl-acyl-carrier-protein synthase II;	map00061	Fatty acid biosynthesis	bbr	ssp	mxa	lil	hpa	lin	eco	son	ama	bba	bpa	bbr	gka	lpf	ngo	sme	cte	cli	tdn	aae	hth	nam
		x	C01268	5-Amino-6-(5'-phosphoribosylamino)uracil;	C01304	2,5-Diamino-6-(5'-phosphoribosylamino)-4-pyrimidineone	3.5.4.26	diaminohydroxyphosphoribosylaminopyrimidine deaminase	map00740	Riboflavin metabolism	bbr	ssp	mxa	lil	hpa		eco	son	ama	bba	bpa	bbr	gka	lpf	ngo	sme	cte	cli	tdn	aae	hth	nam
		x	C01268	5-Amino-6-(5'-phosphoribosylamino)uracil;	C04454	5-Amino-6-(5'-phosphoribitylamino)uracil;	1.1.1.193	5-amino-6-(5-phosphoribosylamino)uracil reductase;	map00740	Riboflavin metabolism	bbr	ssp	mxa	lil	hpa		eco	son	ama	bba	bpa	bbr	gka	lpf	ngo	sme	cte	cli	tdn	aae	hth	nam
		x	C00091	Succinyl-CoA;	C16254	[Dihydrolipoyllysine-residue succinyltransferase]	2.3.1.61	dihydrolipoyllysine-residue succinyltransferase;	map00020	Citrate cycle (TCA cycle)	bbr	ssp	mxa	lil			eco	son	ama	bba	bpa	bbr	gka	lpf	ngo	sme		cli
		x	C15973	Enzyme N6-(dihydrolipoyl)lysine;	C16254	[Dihydrolipoyllysine-residue succinyltransferase]	2.3.1.61	dihydrolipoyllysine-residue succinyltransferase;	map00020	Citrate cycle (TCA cycle)	bbr	ssp	mxa	lil			eco	son	ama	bba	bpa	bbr	gka	lpf	ngo	sme		cli
		x	C15972	Enzyme N6-(lipoyl)lysine;	C15973	Enzyme N6-(dihydrolipoyl)lysine;	1.8.1.4	dihydrolipoyl dehydrogenase;	map00010; map00020; map00280; map00620	Glycolysis / Gluconeogenesis; Citrate cycle (TCA cycle); Valine, leucine and isoleucine degradation; Pyruvate metabolism	bbr	ssp	mxa	lil		lin	eco	son	ama	bba	bpa	bbr	gka	lpf	ngo	sme	cte	cli		aae	hth	nam
		x	C15972	Enzyme N6-(lipoyl)lysine;	C16254	[Dihydrolipoyllysine-residue succinyltransferase]	1.2.4.2	oxoglutarate dehydrogenase (succinyl-transferring);	map00020	Citrate cycle (TCA cycle)	bbr	ssp	mxa	lil			eco	son	ama	bba	bpa	bbr	gka	lpf	ngo	sme		cli
		x	C05752	Octanoyl-[acp];	C05753	3-Oxodecanoyl-[acp];	2.3.1.-	<Transferases; Acyltransferases; Transferring groups other than amino-acyl groups>	map00061	Fatty acid biosynthesis	bbr	ssp	mxa	lil	hpa	lin	eco	son		bba	bpa	bbr	gka	lpf	ngo	sme	cte	cli	tdn	aae	hth	nam
		x	C00144	GMP;	C00655	Xanthosine 5'-phosphate;	6.3.5.2	GMP synthase (glutamine-hydrolysing);	map00230	Purine metabolism	bbr	ssp	mxa	lil	hpa	lin	eco	son	ama	bba	bpa	bbr	gka	lpf	ngo	sme	cte	cli	tdn	aae	hth	nam
		x	C00130	IMP;	C00655	Xanthosine 5'-phosphate;	1.1.1.205	IMP dehydrogenase;	map00230	Purine metabolism	bbr	ssp	mxa	lil	hpa	lin	eco	son	ama	bba	bpa	bbr	gka	lpf	ngo	sme	cte	cli	tdn	aae	hth	nam
		x	C00130	IMP;	C04734	1-(5'-Phosphoribosyl)-5-formamido-4-imidazolecarboxamide;	3.5.4.10	IMP cyclohydrolase;	map00230	Purine metabolism	bbr	ssp	mxa	lil		lin	eco	son	ama	bba	bpa	bbr	gka	lpf	ngo	sme	cte	cli	tdn	aae	hth	nam
		x	C04677	1-(5'-Phosphoribosyl)-5-amino-4-imidazolecarboxamide;	C04734	1-(5'-Phosphoribosyl)-5-formamido-4-imidazolecarboxamide;	6.3.4.-	<Ligases; Forming carbon-nitrogen bonds; Other carbon--nitrogen ligases>	map00230	Purine metabolism	bbr	ssp	mxa	lil	hpa	lin	eco	son	ama	bba	bpa	bbr	gka	lpf	ngo	sme	cte	cli	tdn	aae	hth	nam
		x	C04677	1-(5'-Phosphoribosyl)-5-amino-4-imidazolecarboxamide;	C04823	1-(5'-Phosphoribosyl)-5-amino-4-(N-succinocarboxamide)-imidazole;	4.3.2.2	adenylosuccinate lyase;	map00230	Purine metabolism	bbr	ssp	mxa	lil	hpa	lin	eco	son	ama	bba	bpa	bbr	gka	lpf	ngo	sme	cte	cli	tdn	aae	hth	nam
		x	C04751	1-(5-Phospho-D-ribosyl)-5-amino-4-imidazolecarboxylate;	C04823	1-(5'-Phosphoribosyl)-5-amino-4-(N-succinocarboxamide)-imidazole;	6.3.2.6	phosphoribosylaminoimidazolesuccinocarboxamide synthase;	map00230	Purine metabolism	bbr	ssp	mxa	lil		lin	eco	son	ama	bba	bpa	bbr	gka	lpf	ngo	sme	cte	cli	tdn	aae	hth	nam
		x	C04751	1-(5-Phospho-D-ribosyl)-5-amino-4-imidazolecarboxylate;	C15667	5-Carboxyamino-1-(5-phospho-D-ribosyl)imidazole	5.4.99.18	5-(carboxyamino)imidazole ribonucleotide mutase;	map00230	Purine metabolism	bbr	ssp	mxa	lil		lin	eco	son	ama	bba	bpa	bbr	gka	lpf	ngo	sme	cte	cli	tdn	aae	hth	nam
		x	C00130	IMP;	C04734	1-(5'-Phosphoribosyl)-5-formamido-4-imidazolecarboxamide;	2.1.2.3	phosphoribosylaminoimidazolecarboxamide formyltransferase;	map00230	Purine metabolism	bbr	ssp	mxa	lil		lin	eco	son	ama	bba	bpa	bbr	gka	lpf	ngo	sme	cte	cli	tdn	aae	hth	nam
		x	C00130	IMP;	C03794	N6-(1,2-Dicarboxyethyl)-AMP;	6.3.4.4	adenylosuccinate synthase;	map00230	Purine metabolism	bbr	ssp	mxa	lil	hpa	lin	eco	son	ama	bba	bpa	bbr	gka	lpf	ngo	sme	cte	cli	tdn	aae	hth	nam
		x	C00020	AMP;	C03794	N6-(1,2-Dicarboxyethyl)-AMP;	4.3.2.2	adenylosuccinate lyase;	map00230	Purine metabolism	bbr	ssp	mxa	lil	hpa	lin	eco	son	ama	bba	bpa	bbr	gka	lpf	ngo	sme	cte	cli	tdn	aae	hth	nam
		x	C04677	1-(5'-Phosphoribosyl)-5-amino-4-imidazolecarboxamide;	C04734	1-(5'-Phosphoribosyl)-5-formamido-4-imidazolecarboxamide;	2.1.2.3	phosphoribosylaminoimidazolecarboxamide formyltransferase;	map00230	Purine metabolism	bbr	ssp	mxa	lil		lin	eco	son	ama	bba	bpa	bbr	gka	lpf	ngo	sme	cte	cli	tdn	aae	hth	nam
		x	C00046	RNA;	C00075	UTP;	2.7.7.6	DNA-directed RNA polymerase;	map00240	Pyrimidine metabolism	bbr	ssp	mxa	lil	hpa	lin	eco	son	ama	bba	bpa	bbr	gka	lpf	ngo	sme	cte	cli	tdn	aae	hth	nam
		x	C00279	D-Erythrose 4-phosphate	C05345	beta-D-Fructose 6-phosphate	2.2.1.1	transketolase;	map00030	Pentose phosphate pathway	bbr	ssp	mxa	lil	hpa	lin	eco	son	ama	bba	bpa	bbr	gka	lpf	ngo	sme	cte	cli	tdn	aae	hth	nam
		x	C05223	Dodecanoyl-[acyl-carrier protein];	C05758	trans-Dodec-2-enoyl-[acp];	2.3.1.-	<Transferases; Acyltransferases; Transferring groups other than amino-acyl groups>	map00061	Fatty acid biosynthesis	bbr	ssp	mxa	lil	hpa	lin	eco	son		bba	bpa	bbr	gka	lpf	ngo	sme	cte	cli	tdn	aae	hth	nam
		x	C00074	Phosphoenolpyruvate;	C00631	2-Phospho-D-glycerate;	4.2.1.11	phosphopyruvate hydratase;	map00010	Glycolysis / Gluconeogenesis	bbr	ssp	mxa	lil	hpa	lin	eco	son	ama	bba	bpa	bbr	gka	lpf	ngo	sme	cte	cli	tdn	aae	hth	nam
		x	C00002	ATP;	C00008	ADP;	2.7.4.6	nucleoside-diphosphate kinase;	map00230	Purine metabolism	bbr	ssp	mxa	lil	hpa	lin	eco	son	ama	bba	bpa	bbr	gka	lpf	ngo	sme	cte	cli	tdn	aae	hth	nam
		x	C00002	ATP;	C00008	ADP;	2.7.1.40	pyruvate kinase;	map00230	Purine metabolism	bbr	ssp	mxa	lil		lin	eco	son		bba	bpa	bbr	gka	lpf	ngo	sme						nam
		x	C00311	Isocitrate;	C00417	cis-Aconitate;	4.2.1.3	aconitate hydratase;	map00020; map00630; map00720	Citrate cycle (TCA cycle); Glyoxylate and dicarboxylate metabolism; Reductive carboxylate cycle (CO2 fixation)	bbr	ssp	mxa	lil	hpa	lin	eco	son	ama	bba	bpa	bbr	gka	lpf	ngo	sme	cte	cli	tdn	aae	hth	nam
		x	C00117	D-Ribose 5-phosphate;	C05382	Sedoheptulose 7-phosphate;	2.2.1.1	transketolase;	map00030; map00710	Pentose phosphate pathway; Carbon fixation in photosynthetic organisms	bbr	ssp	mxa	lil	hpa	lin	eco	son	ama	bba	bpa	bbr	gka	lpf	ngo	sme	cte	cli	tdn	aae	hth	nam
		x	C00111	Glycerone phosphate;	C00118	D-Glyceraldehyde 3-phosphate;	5.3.1.1	triose-phosphate isomerase;	map00010; map00051; map00562; map00710	Glycolysis / Gluconeogenesis; Fructose and mannose metabolism; Inositol phosphate metabolism; Carbon fixation in photosynthetic organisms	bbr	ssp	mxa	lil	hpa	lin	eco	son	ama	bba	bpa	bbr	gka	lpf	ngo	sme	cte	cli	tdn	aae	hth	nam
		x	C00111	Glycerone phosphate;	C01094	D-Fructose 1-phosphate	4.1.2.13	fructose-bisphosphate aldolase;	map00051	Fructose and mannose metabolism	bbr	ssp	mxa	lil	hpa	lin	eco	son	ama	bba	bpa	bbr	gka	lpf	ngo	sme	cte	cli	tdn	aae	hth	nam
		x	C05761	Tetradecanoyl-[acp];	C05762	3-Oxohexadecanoyl-[acp];	2.3.1.-	<Transferases; Acyltransferases; Transferring groups other than amino-acyl groups>	map00061	Fatty acid biosynthesis	bbr	ssp	mxa	lil	hpa	lin	eco	son		bba	bpa	bbr	gka	lpf	ngo	sme	cte	cli	tdn	aae	hth	nam
		x	C00008	ADP;	C00020	AMP;	2.7.4.3	adenylate kinase;	map00230	Purine metabolism	bbr	ssp	mxa	lil	hpa	lin	eco	son	ama	bba	bpa	bbr	gka	lpf	ngo	sme	cte	cli	tdn	aae	hth	nam
		x	C00111	Glycerone phosphate;	C05378	beta-D-Fructose 1,6-bisphosphate	4.1.2.13	fructose-bisphosphate aldolase;	map00010; map00051	Glycolysis / Gluconeogenesis; Fructose and mannose metabolism	bbr	ssp	mxa	lil	hpa	lin	eco	son	ama	bba	bpa	bbr	gka	lpf	ngo	sme	cte	cli	tdn	aae	hth	nam
		x	C04619	(3R)-3-Hydroxydecanoyl-[acyl-carrier protein];	C05753	3-Oxodecanoyl-[acp];	2.3.1.-	<Transferases; Acyltransferases; Transferring groups other than amino-acyl groups>	map00061	Fatty acid biosynthesis	bbr	ssp	mxa	lil	hpa	lin	eco	son		bba	bpa	bbr	gka	lpf	ngo	sme	cte	cli	tdn	aae	hth	nam
		x	C00026	2-Oxoglutarate;	C16254	[Dihydrolipoyllysine-residue succinyltransferase]	1.2.4.2	oxoglutarate dehydrogenase (succinyl-transferring);	map00020	Citrate cycle (TCA cycle)	bbr	ssp	mxa	lil			eco	son	ama	bba	bpa	bbr	gka	lpf	ngo	sme		cli
		x	C00112	CDP;	C00705	dCDP;	1.17.4.1	ribonucleoside-diphosphate reductase;	map00240	Pyrimidine metabolism	bbr	ssp	mxa	lil	hpa	lin	eco	son	ama	bba	bpa	bbr	gka	lpf	ngo	sme	cte	cli	tdn	aae	hth	nam
		x	C00352	D-Glucosamine 6-phosphate;	C05345	beta-D-Fructose 6-phosphate	2.6.1.16	glutamine---fructose-6-phosphate transaminase (isomerizing);	map00520	Amino sugar and nucleotide sugar metabolism	bbr	ssp	mxa	lil	hpa	lin	eco	son	ama	bba	bpa	bbr	gka	lpf	ngo	sme	cte	cli	tdn	aae	hth	nam
		x	C04620	(3R)-3-Hydroxyoctanoyl-[acyl-carrier protein];	C05750	3-Oxooctanoyl-[acp];	1.1.1.100	3-oxoacyl-[acyl-carrier-protein] reductase;	map00061	Fatty acid biosynthesis	bbr	ssp	mxa	lil	hpa	lin	eco	son	ama	bba	bpa	bbr	gka	lpf	ngo	sme	cte	cli	tdn	aae	hth	nam
		x	C05223	Dodecanoyl-[acyl-carrier protein];	C05759	3-Oxotetradecanoyl-[acp];	2.3.1.-	<Transferases; Acyltransferases; Transferring groups other than amino-acyl groups>	map00061	Fatty acid biosynthesis	bbr	ssp	mxa	lil	hpa	lin	eco	son		bba	bpa	bbr	gka	lpf	ngo	sme	cte	cli	tdn	aae	hth	nam
		x	C04501	N-Acetyl-alpha-D-glucosamine 1-phosphate	C06156	alpha-D-Glucosamine 1-phosphate;	2.3.1.157	glucosamine-1-phosphate N-acetyltransferase	map00520	Amino sugar and nucleotide sugar metabolism	bbr	ssp	mxa		hpa	lin	eco	son	ama	bba	bpa	bbr	gka	lpf	ngo	sme			tdn	aae	hth	nam
		x	C00043	UDP-N-acetyl-D-glucosamine;	C04501	N-Acetyl-alpha-D-glucosamine 1-phosphate	2.7.7.23	UDP-N-acetylglucosamine diphosphorylase;	map00520	Amino sugar and nucleotide sugar metabolism	bbr	ssp	mxa	lil	hpa	lin	eco	son	ama	bba	bpa	bbr	gka	lpf	ngo	sme	cte	cli	tdn	aae	hth	nam
		x	C00043	UDP-N-acetyl-D-glucosamine;	C04631	UDP-N-acetyl-3-(1-carboxyvinyl)-D-glucosamine;	2.5.1.7	UDP-N-acetylglucosamine 1-carboxyvinyltransferase;	map00520; map00550	Amino sugar and nucleotide sugar metabolism; Peptidoglycan biosynthesis	bbr	ssp	mxa	lil	hpa	lin	eco	son	ama	bba	bpa	bbr	gka	lpf	ngo	sme	cte	cli	tdn	aae	hth	nam
		x	C01050	UDP-N-acetylmuramate;	C04631	UDP-N-acetyl-3-(1-carboxyvinyl)-D-glucosamine;	1.1.1.158	UDP-N-acetylmuramate dehydrogenase;	map00520; map00550	Amino sugar and nucleotide sugar metabolism; Peptidoglycan biosynthesis	bbr	ssp	mxa	lil	hpa	lin	eco	son	ama	bba	bpa	bbr	gka	lpf	ngo	sme	cte	cli	tdn	aae	hth	nam
		x	C01050	UDP-N-acetylmuramate;	C01212	UDP-N-acetylmuramoyl-L-alanine	6.3.2.8	UDP-N-acetylmuramate---L-alanine ligase;	map00471; map00550	D-Glutamine and D-glutamate metabolism; Peptidoglycan biosynthesis	bbr	ssp	mxa	lil	hpa	lin	eco	son	ama	bba	bpa	bbr	gka	lpf	ngo	sme	cte	cli	tdn	aae	hth	nam
		x	C00692	UDP-N-acetylmuramoyl-L-alanyl-D-glutamate	C01212	UDP-N-acetylmuramoyl-L-alanine	6.3.2.9	UDP-N-acetylmuramoyl-L-alanine---D-glutamate ligase;	map00471; map00550	D-Glutamine and D-glutamate metabolism; Peptidoglycan biosynthesis	bbr	ssp	mxa	lil	hpa	lin	eco	son	ama	bba	bpa	bbr	gka	lpf	ngo	sme	cte	cli	tdn	aae	hth	nam
		x	C00117	D-Ribose 5-phosphate;	C00199	D-Ribulose 5-phosphate	5.3.1.6	ribose-5-phosphate isomerase;	map00030; map00710	Pentose phosphate pathway; Carbon fixation in photosynthetic organisms	bbr	ssp	mxa	lil	hpa	lin	eco	son	ama	bba	bpa	bbr	gka	lpf	ngo	sme	cte	cli	tdn	aae	hth	nam
		x	C00295	Orotate;	C01103	Orotidine 5'-phosphate;	2.4.2.10	orotate phosphoribosyltransferase;	map00240	Pyrimidine metabolism	bbr	ssp	mxa	lil	hpa	lin	eco	son	ama	bba	bpa	bbr	gka	lpf	ngo	sme	cte	cli	tdn	aae	hth	nam
		x	C03838	5'-Phosphoribosylglycinamide;	C04376	5'-Phosphoribosyl-N-formylglycinamide;	2.1.2.2	phosphoribosylglycinamide formyltransferase;	map00230	Purine metabolism	bbr	ssp	mxa	lil		lin	eco	son	ama	bba	bpa	bbr	gka	lpf	ngo	sme	cte	cli	tdn	aae	hth	nam
		x	C04376	5'-Phosphoribosyl-N-formylglycinamide;	C04640	2-(Formamido)-N1-(5'-phosphoribosyl)acetamidine;	6.3.5.3	phosphoribosylformylglycinamidine synthase;	map00230	Purine metabolism	bbr	ssp	mxa	lil		lin	eco	son	ama	bba	bpa	bbr	gka	lpf	ngo	sme	cte	cli	tdn	aae	hth	nam
		x	C03373	Aminoimidazole ribotide;	C04640	2-(Formamido)-N1-(5'-phosphoribosyl)acetamidine;	6.3.3.1	phosphoribosylformylglycinamidine cyclo-ligase;	map00230	Purine metabolism	bbr	ssp	mxa	lil		lin	eco	son	ama	bba	bpa	bbr	gka	lpf	ngo	sme	cte	cli	tdn	aae	hth	nam
		x	C05745	Butyryl-[acp];	C05746	3-Oxohexanoyl-[acp];	2.3.1.-	<Transferases; Acyltransferases; Transferring groups other than amino-acyl groups>	map00061	Fatty acid biosynthesis	bbr	ssp	mxa	lil	hpa	lin	eco	son		bba	bpa	bbr	gka	lpf	ngo	sme	cte	cli	tdn	aae	hth	nam
		x	C00024	Acetyl-CoA;	C00033	Acetate;	6.2.1.1	acetate---CoA ligase;	map00010; map00620; map00720	Glycolysis / Gluconeogenesis; Pyruvate metabolism; Reductive carboxylate cycle (CO2 fixation)	bbr	ssp	mxa	lil	hpa	lin	eco	son		bba	bpa	bbr	gka	lpf		sme	cte	cli	tdn	aae	hth	nam
		x	C00154	Palmitoyl-CoA;	C05272	trans-Hexadec-2-enoyl-CoA;	1.3.99.-	<Oxidoreductases; Acting on the CH-CH group of donors; With other acceptors>	map00071	Fatty acid metabolism	bbr	ssp	mxa				eco	son		bba	bpa	bbr	gka	lpf	ngo	sme
		x	C05258	(S)-3-Hydroxyhexadecanoyl-CoA	C05272	trans-Hexadec-2-enoyl-CoA;	4.2.1.17	enoyl-CoA hydratase;	map00062; map00071	Fatty acid elongation in mitochondria; Fatty acid metabolism	bbr	ssp	mxa	lil			eco	son		bba	bpa	bbr	gka	lpf		sme
		x	C05258	(S)-3-Hydroxyhexadecanoyl-CoA	C05259	3-Oxopalmitoyl-CoA;	1.1.1.35	3-hydroxyacyl-CoA dehydrogenase;	map00062; map00071	Fatty acid elongation in mitochondria; Fatty acid metabolism	bbr	ssp	mxa				eco	son		bba	bpa	bbr	gka	lpf		sme
		x	C05761	Tetradecanoyl-[acp];	C05762	3-Oxohexadecanoyl-[acp];	2.3.1.179	beta-ketoacyl-acyl-carrier-protein synthase II;	map00061	Fatty acid biosynthesis	bbr	ssp	mxa	lil	hpa	lin	eco	son	ama	bba	bpa	bbr	gka	lpf	ngo	sme	cte	cli	tdn	aae	hth	nam
		x	C04618	(3R)-3-Hydroxybutanoyl-[acyl-carrier protein];	C05744	Acetoacetyl-[acp];	1.1.1.100	3-oxoacyl-[acyl-carrier-protein] reductase;	map00061	Fatty acid biosynthesis	bbr	ssp	mxa	lil	hpa	lin	eco	son	ama	bba	bpa	bbr	gka	lpf	ngo	sme	cte	cli	tdn	aae	hth	nam
Subsystem 48	0.006191950464396287										bbr	ssp	mxa				eco	son		bba	bpa	bbr	gka	lpf		sme
		i	C05264	(S)-Hydroxydecanoyl-CoA;	C05265	3-Oxodecanoyl-CoA	1.1.1.35	3-hydroxyacyl-CoA dehydrogenase;	map00062; map00071	Fatty acid elongation in mitochondria; Fatty acid metabolism	bbr	ssp	mxa				eco	son		bba	bpa	bbr	gka	lpf		sme
		x	C05264	(S)-Hydroxydecanoyl-CoA;	C05275	trans-Dec-2-enoyl-CoA;	4.2.1.17	enoyl-CoA hydratase;	map00062; map00071	Fatty acid elongation in mitochondria; Fatty acid metabolism	bbr	ssp	mxa	lil			eco	son		bba	bpa	bbr	gka	lpf		sme
		x	C05274	Decanoyl-CoA	C05275	trans-Dec-2-enoyl-CoA;	1.3.99.-	<Oxidoreductases; Acting on the CH-CH group of donors; With other acceptors>	map00071	Fatty acid metabolism	bbr	ssp	mxa				eco	son		bba	bpa	bbr	gka	lpf	ngo	sme
Subsystem 49	0.006191950464396287										bbr	ssp	mxa				eco	son		bba	bpa	bbr	gka	lpf		sme
		i	C03344	2-Methylacetoacetyl-CoA;	C04405	(2S,3S)-3-Hydroxy-2-methylbutanoyl-CoA;	1.1.1.35	3-hydroxyacyl-CoA dehydrogenase;	map00280	Valine, leucine and isoleucine degradation	bbr	ssp	mxa				eco	son		bba	bpa	bbr	gka	lpf		sme
		x	C03345	2-Methylbut-2-enoyl-CoA;	C04405	(2S,3S)-3-Hydroxy-2-methylbutanoyl-CoA;	4.2.1.17	enoyl-CoA hydratase;	map00280	Valine, leucine and isoleucine degradation	bbr	ssp	mxa	lil			eco	son		bba	bpa	bbr	gka	lpf		sme
Subsystem 50	0.006191950464396287										bbr	ssp	mxa				eco	son	ama	bba	bpa	bbr		lpf		sme
		i	C17561	2-Polyprenyl-3-methyl-6-methoxy-1,4-benzoquinone	C17562	2-Polyprenyl-3-methyl-5-hydroxy-6-methoxy-1,4-benzoquinone	1.14.13.-	<Oxidoreductases; Acting on paired donors with incorporation of molecular oxygen; With NADH or NADPH as one donor, and incorporation of one atom of oxygen>	map00130	Ubiquinone and other terpenoid-quinone biosynthesis	bbr	ssp	mxa				eco	son	ama	bba	bpa	bbr		lpf		sme
		x	C17560	2-Polyprenyl-6-methoxy-1,4-benzoquinone	C17561	2-Polyprenyl-3-methyl-6-methoxy-1,4-benzoquinone	2.1.1.-	<Transferases; Transferring one-carbon groups; Methyltransferases>	map00130	Ubiquinone and other terpenoid-quinone biosynthesis	bbr	ssp	mxa	lil	hpa	lin	eco	son	ama	bba	bpa	bbr	gka	lpf	ngo	sme	cte	cli	tdn	aae	hth	nam
		x	C17552	2-Polyprenyl-6-methoxyphenol	C17560	2-Polyprenyl-6-methoxy-1,4-benzoquinone	1.14.13.-	<Oxidoreductases; Acting on paired donors with incorporation of molecular oxygen; With NADH or NADPH as one donor, and incorporation of one atom of oxygen>	map00130	Ubiquinone and other terpenoid-quinone biosynthesis	bbr	ssp	mxa				eco	son	ama	bba	bpa	bbr		lpf		sme
Subsystem 51	0.006191950464396287										bbr	ssp	mxa	lil			eco	son		bba	bpa	bbr	gka			sme
		i	C16330	3-Oxo-OPC8-CoA	C16331	OPC6-CoA	2.3.1.16	acetyl-CoA C-acyltransferase;	map00592	alpha-Linolenic acid metabolism	bbr	ssp	mxa	lil			eco	son		bba	bpa	bbr	gka			sme
		x	C16328	trans-2-Enoyl-OPC8-CoA	C16330	3-Oxo-OPC8-CoA	4.2.1.17	enoyl-CoA hydratase;	map00592	alpha-Linolenic acid metabolism	bbr	ssp	mxa	lil			eco	son		bba	bpa	bbr	gka	lpf		sme
Subsystem 52	0.006191950464396287										bbr	ssp	mxa	lil			eco	son		bba	bpa	bbr	gka			sme
		i	C01832	Lauroyl-CoA;	C05261	3-Oxotetradecanoyl-CoA	2.3.1.16	acetyl-CoA C-acyltransferase;	map00062; map00071	Fatty acid elongation in mitochondria; Fatty acid metabolism	bbr	ssp	mxa	lil			eco	son		bba	bpa	bbr	gka			sme
		x	C00024	Acetyl-CoA;	C05261	3-Oxotetradecanoyl-CoA	2.3.1.16	acetyl-CoA C-acyltransferase;	map00062; map00071	Fatty acid elongation in mitochondria; Fatty acid metabolism	bbr	ssp	mxa	lil			eco	son		bba	bpa	bbr	gka			sme
		x	C00024	Acetyl-CoA;	C00158	Citrate;	2.3.3.1	citrate (Si)-synthase;	map00020; map00630	Citrate cycle (TCA cycle); Glyoxylate and dicarboxylate metabolism	bbr	ssp	mxa	lil	hpa	lin	eco	son	ama	bba	bpa	bbr	gka	lpf	ngo	sme	cte	cli	tdn	aae	hth
		x	C00158	Citrate;	C00417	cis-Aconitate;	4.2.1.3	aconitate hydratase;	map00020; map00630; map00720	Citrate cycle (TCA cycle); Glyoxylate and dicarboxylate metabolism; Reductive carboxylate cycle (CO2 fixation)	bbr	ssp	mxa	lil	hpa	lin	eco	son	ama	bba	bpa	bbr	gka	lpf	ngo	sme	cte	cli	tdn	aae	hth	nam
		x	C00024	Acetyl-CoA;	C03939	Acetyl-[acyl-carrier protein]	2.3.1.-	<Transferases; Acyltransferases; Transferring groups other than amino-acyl groups>	map00061	Fatty acid biosynthesis	bbr	ssp	mxa	lil	hpa	lin	eco	son		bba	bpa	bbr	gka	lpf	ngo	sme	cte	cli	tdn	aae	hth	nam
		x	C03939	Acetyl-[acyl-carrier protein]	C05744	Acetoacetyl-[acp];	2.3.1.-	<Transferases; Acyltransferases; Transferring groups other than amino-acyl groups>	map00061	Fatty acid biosynthesis	bbr	ssp	mxa	lil	hpa	lin	eco	son		bba	bpa	bbr	gka	lpf	ngo	sme	cte	cli	tdn	aae	hth	nam
		x	C00022	Pyruvate;	C00024	Acetyl-CoA;	1.8.1.4	dihydrolipoyl dehydrogenase;	map00010; map00020; map00620	Glycolysis / Gluconeogenesis; Citrate cycle (TCA cycle); Pyruvate metabolism	bbr	ssp	mxa	lil		lin	eco	son	ama	bba	bpa	bbr	gka	lpf	ngo	sme	cte	cli		aae	hth	nam
		x	C00024	Acetyl-CoA;	C03939	Acetyl-[acyl-carrier protein]	2.3.1.180	beta-ketoacyl-acyl-carrier-protein synthase III;	map00061	Fatty acid biosynthesis	bbr	ssp	mxa	lil	hpa	lin	eco	son	ama	bba	bpa	bbr	gka	lpf	ngo	sme	cte	cli	tdn	aae	hth	nam
		x	C01209	Malonyl-[acyl-carrier protein]	C05744	Acetoacetyl-[acp];	2.3.1.-	<Transferases; Acyltransferases; Transferring groups other than amino-acyl groups>	map00061	Fatty acid biosynthesis	bbr	ssp	mxa	lil	hpa	lin	eco	son		bba	bpa	bbr	gka	lpf	ngo	sme	cte	cli	tdn	aae	hth	nam
		x	C01209	Malonyl-[acyl-carrier protein]	C05750	3-Oxooctanoyl-[acp];	2.3.1.-	<Transferases; Acyltransferases; Transferring groups other than amino-acyl groups>	map00061	Fatty acid biosynthesis	bbr	ssp	mxa	lil	hpa	lin	eco	son		bba	bpa	bbr	gka	lpf	ngo	sme	cte	cli	tdn	aae	hth	nam
		x	C01209	Malonyl-[acyl-carrier protein]	C05762	3-Oxohexadecanoyl-[acp];	2.3.1.-	<Transferases; Acyltransferases; Transferring groups other than amino-acyl groups>	map00061	Fatty acid biosynthesis	bbr	ssp	mxa	lil	hpa	lin	eco	son		bba	bpa	bbr	gka	lpf	ngo	sme	cte	cli	tdn	aae	hth	nam
		x	C04633	(3R)-3-Hydroxypalmitoyl-[acyl-carrier protein];	C05762	3-Oxohexadecanoyl-[acp];	2.3.1.-	<Transferases; Acyltransferases; Transferring groups other than amino-acyl groups>	map00061	Fatty acid biosynthesis	bbr	ssp	mxa	lil	hpa	lin	eco	son		bba	bpa	bbr	gka	lpf	ngo	sme	cte	cli	tdn	aae	hth	nam
		x	C01209	Malonyl-[acyl-carrier protein]	C05753	3-Oxodecanoyl-[acp];	2.3.1.-	<Transferases; Acyltransferases; Transferring groups other than amino-acyl groups>	map00061	Fatty acid biosynthesis	bbr	ssp	mxa	lil	hpa	lin	eco	son		bba	bpa	bbr	gka	lpf	ngo	sme	cte	cli	tdn	aae	hth	nam
		x	C05752	Octanoyl-[acp];	C05753	3-Oxodecanoyl-[acp];	2.3.1.179	beta-ketoacyl-acyl-carrier-protein synthase II;	map00061	Fatty acid biosynthesis	bbr	ssp	mxa	lil	hpa	lin	eco	son	ama	bba	bpa	bbr	gka	lpf	ngo	sme	cte	cli	tdn	aae	hth	nam
		x	C01209	Malonyl-[acyl-carrier protein]	C05753	3-Oxodecanoyl-[acp];	2.3.1.179	beta-ketoacyl-acyl-carrier-protein synthase II;	map00061	Fatty acid biosynthesis	bbr	ssp	mxa	lil	hpa	lin	eco	son	ama	bba	bpa	bbr	gka	lpf	ngo	sme	cte	cli	tdn	aae	hth	nam
		x	C04620	(3R)-3-Hydroxyoctanoyl-[acyl-carrier protein];	C05750	3-Oxooctanoyl-[acp];	2.3.1.-	<Transferases; Acyltransferases; Transferring groups other than amino-acyl groups>	map00061	Fatty acid biosynthesis	bbr	ssp	mxa	lil	hpa	lin	eco	son		bba	bpa	bbr	gka	lpf	ngo	sme	cte	cli	tdn	aae	hth	nam
		x	C04620	(3R)-3-Hydroxyoctanoyl-[acyl-carrier protein];	C05751	trans-Oct-2-enoyl-[acp];	2.3.1.-	<Transferases; Acyltransferases; Transferring groups other than amino-acyl groups>	map00061	Fatty acid biosynthesis	bbr	ssp	mxa	lil	hpa	lin	eco	son		bba	bpa	bbr	gka	lpf	ngo	sme	cte	cli	tdn	aae	hth	nam
		x	C01209	Malonyl-[acyl-carrier protein]	C05759	3-Oxotetradecanoyl-[acp];	2.3.1.179	beta-ketoacyl-acyl-carrier-protein synthase II;	map00061	Fatty acid biosynthesis	bbr	ssp	mxa	lil	hpa	lin	eco	son	ama	bba	bpa	bbr	gka	lpf	ngo	sme	cte	cli	tdn	aae	hth	nam
		x	C04688	(3R)-3-Hydroxytetradecanoyl-[acyl-carrier protein];	C05759	3-Oxotetradecanoyl-[acp];	2.3.1.-	<Transferases; Acyltransferases; Transferring groups other than amino-acyl groups>	map00061	Fatty acid biosynthesis	bbr	ssp	mxa	lil	hpa	lin	eco	son		bba	bpa	bbr	gka	lpf	ngo	sme	cte	cli	tdn	aae	hth	nam
		x	C00024	Acetyl-CoA;	C05265	3-Oxodecanoyl-CoA	2.3.1.16	acetyl-CoA C-acyltransferase;	map00062; map00071	Fatty acid elongation in mitochondria; Fatty acid metabolism	bbr	ssp	mxa	lil			eco	son		bba	bpa	bbr	gka			sme
		x	C05223	Dodecanoyl-[acyl-carrier protein];	C05759	3-Oxotetradecanoyl-[acp];	2.3.1.179	beta-ketoacyl-acyl-carrier-protein synthase II;	map00061	Fatty acid biosynthesis	bbr	ssp	mxa	lil	hpa	lin	eco	son	ama	bba	bpa	bbr	gka	lpf	ngo	sme	cte	cli	tdn	aae	hth	nam
		x	C05749	Hexanoyl-[acp];	C05750	3-Oxooctanoyl-[acp];	2.3.1.179	beta-ketoacyl-acyl-carrier-protein synthase II;	map00061	Fatty acid biosynthesis	bbr	ssp	mxa	lil	hpa	lin	eco	son	ama	bba	bpa	bbr	gka	lpf	ngo	sme	cte	cli	tdn	aae	hth	nam
		x	C05748	trans-Hex-2-enoyl-[acp];	C05749	Hexanoyl-[acp];	2.3.1.-	<Transferases; Acyltransferases; Transferring groups other than amino-acyl groups>	map00061	Fatty acid biosynthesis	bbr	ssp	mxa	lil	hpa	lin	eco	son		bba	bpa	bbr	gka	lpf	ngo	sme	cte	cli	tdn	aae	hth	nam
		x	C01209	Malonyl-[acyl-carrier protein]	C05759	3-Oxotetradecanoyl-[acp];	2.3.1.-	<Transferases; Acyltransferases; Transferring groups other than amino-acyl groups>	map00061	Fatty acid biosynthesis	bbr	ssp	mxa	lil	hpa	lin	eco	son		bba	bpa	bbr	gka	lpf	ngo	sme	cte	cli	tdn	aae	hth	nam
		x	C03939	Acetyl-[acyl-carrier protein]	C05744	Acetoacetyl-[acp];	2.3.1.179	beta-ketoacyl-acyl-carrier-protein synthase II;	map00061	Fatty acid biosynthesis	bbr	ssp	mxa	lil	hpa	lin	eco	son	ama	bba	bpa	bbr	gka	lpf	ngo	sme	cte	cli	tdn	aae	hth	nam
		x	C03939	Acetyl-[acyl-carrier protein]	C05744	Acetoacetyl-[acp];	2.3.1.180	beta-ketoacyl-acyl-carrier-protein synthase III;	map00061	Fatty acid biosynthesis	bbr	ssp	mxa	lil	hpa	lin	eco	son	ama	bba	bpa	bbr	gka	lpf	ngo	sme	cte	cli	tdn	aae	hth	nam
		x	C00024	Acetyl-CoA;	C05259	3-Oxopalmitoyl-CoA;	2.3.1.16	acetyl-CoA C-acyltransferase;	map00062; map00071	Fatty acid elongation in mitochondria; Fatty acid metabolism	bbr	ssp	mxa	lil			eco	son		bba	bpa	bbr	gka			sme
		x	C02593	Tetradecanoyl-CoA;	C05259	3-Oxopalmitoyl-CoA;	2.3.1.16	acetyl-CoA C-acyltransferase;	map00062; map00071	Fatty acid elongation in mitochondria; Fatty acid metabolism	bbr	ssp	mxa	lil			eco	son		bba	bpa	bbr	gka			sme
		x	C01209	Malonyl-[acyl-carrier protein]	C05756	3-Oxododecanoyl-[acp];	2.3.1.179	beta-ketoacyl-acyl-carrier-protein synthase II;	map00061	Fatty acid biosynthesis	bbr	ssp	mxa	lil	hpa	lin	eco	son	ama	bba	bpa	bbr	gka	lpf	ngo	sme	cte	cli	tdn	aae	hth	nam
		x	C05755	Decanoyl-[acp];	C05756	3-Oxododecanoyl-[acp];	2.3.1.179	beta-ketoacyl-acyl-carrier-protein synthase II;	map00061	Fatty acid biosynthesis	bbr	ssp	mxa	lil	hpa	lin	eco	son	ama	bba	bpa	bbr	gka	lpf	ngo	sme	cte	cli	tdn	aae	hth	nam
		x	C05754	trans-Dec-2-enoyl-[acp];	C05755	Decanoyl-[acp];	2.3.1.-	<Transferases; Acyltransferases; Transferring groups other than amino-acyl groups>	map00061	Fatty acid biosynthesis	bbr	ssp	mxa	lil	hpa	lin	eco	son		bba	bpa	bbr	gka	lpf	ngo	sme	cte	cli	tdn	aae	hth	nam
		x	C05756	3-Oxododecanoyl-[acp];	C05757	(R)-3-Hydroxydodecanoyl-[acp];	2.3.1.-	<Transferases; Acyltransferases; Transferring groups other than amino-acyl groups>	map00061	Fatty acid biosynthesis	bbr	ssp	mxa	lil	hpa	lin	eco	son		bba	bpa	bbr	gka	lpf	ngo	sme	cte	cli	tdn	aae	hth	nam
		x	C05757	(R)-3-Hydroxydodecanoyl-[acp];	C05758	trans-Dodec-2-enoyl-[acp];	2.3.1.-	<Transferases; Acyltransferases; Transferring groups other than amino-acyl groups>	map00061	Fatty acid biosynthesis	bbr	ssp	mxa	lil	hpa	lin	eco	son		bba	bpa	bbr	gka	lpf	ngo	sme	cte	cli	tdn	aae	hth	nam
		x	C04633	(3R)-3-Hydroxypalmitoyl-[acyl-carrier protein];	C05763	trans-Hexadec-2-enoyl-[acp];	2.3.1.-	<Transferases; Acyltransferases; Transferring groups other than amino-acyl groups>	map00061	Fatty acid biosynthesis	bbr	ssp	mxa	lil	hpa	lin	eco	son		bba	bpa	bbr	gka	lpf	ngo	sme	cte	cli	tdn	aae	hth	nam
		x	C05749	Hexanoyl-[acp];	C05750	3-Oxooctanoyl-[acp];	2.3.1.-	<Transferases; Acyltransferases; Transferring groups other than amino-acyl groups>	map00061	Fatty acid biosynthesis	bbr	ssp	mxa	lil	hpa	lin	eco	son		bba	bpa	bbr	gka	lpf	ngo	sme	cte	cli	tdn	aae	hth	nam
		x	C01209	Malonyl-[acyl-carrier protein]	C05746	3-Oxohexanoyl-[acp];	2.3.1.-	<Transferases; Acyltransferases; Transferring groups other than amino-acyl groups>	map00061	Fatty acid biosynthesis	bbr	ssp	mxa	lil	hpa	lin	eco	son		bba	bpa	bbr	gka	lpf	ngo	sme	cte	cli	tdn	aae	hth	nam
		x	C05746	3-Oxohexanoyl-[acp];	C05747	(R)-3-Hydroxyhexanoyl-[acp];	1.1.1.100	3-oxoacyl-[acyl-carrier-protein] reductase;	map00061	Fatty acid biosynthesis	bbr	ssp	mxa	lil	hpa	lin	eco	son	ama	bba	bpa	bbr	gka	lpf	ngo	sme	cte	cli	tdn	aae	hth	nam
		x	C00024	Acetyl-CoA;	C05269	3-Oxohexanoyl-CoA;	2.3.1.16	acetyl-CoA C-acyltransferase;	map00062; map00071	Fatty acid elongation in mitochondria; Fatty acid metabolism	bbr	ssp	mxa	lil			eco	son		bba	bpa	bbr	gka			sme
		x	C05755	Decanoyl-[acp];	C05756	3-Oxododecanoyl-[acp];	2.3.1.-	<Transferases; Acyltransferases; Transferring groups other than amino-acyl groups>	map00061	Fatty acid biosynthesis	bbr	ssp	mxa	lil	hpa	lin	eco	son		bba	bpa	bbr	gka	lpf	ngo	sme	cte	cli	tdn	aae	hth	nam
		x	C00024	Acetyl-CoA;	C00332	Acetoacetyl-CoA;	2.3.1.9	acetyl-CoA C-acetyltransferase;	map00071; map00072; map00280; map00310; map00380; map00620; map00632; map00640; map00650; map00900	Fatty acid metabolism; Synthesis and degradation of ketone bodies; Valine, leucine and isoleucine degradation; Lysine degradation; Tryptophan metabolism; Pyruvate metabolism; Benzoate degradation via CoA ligation; Propanoate metabolism; Butanoate metabolism; Terpenoid backbone biosynthesis	bbr	ssp	mxa	lil	hpa	lin	eco	son		bba	bpa	bbr	gka	lpf		sme
		x	C05747	(R)-3-Hydroxyhexanoyl-[acp];	C05748	trans-Hex-2-enoyl-[acp];	2.3.1.-	<Transferases; Acyltransferases; Transferring groups other than amino-acyl groups>	map00061	Fatty acid biosynthesis	bbr	ssp	mxa	lil	hpa	lin	eco	son		bba	bpa	bbr	gka	lpf	ngo	sme	cte	cli	tdn	aae	hth	nam
		x	C00022	Pyruvate;	C00024	Acetyl-CoA;	2.3.1.12	dihydrolipoyllysine-residue acetyltransferase;	map00010; map00020; map00620	Glycolysis / Gluconeogenesis; Citrate cycle (TCA cycle); Pyruvate metabolism	bbr	ssp	mxa	lil		lin	eco	son	ama	bba	bpa	bbr	gka	lpf	ngo	sme					hth	nam
		x	C01209	Malonyl-[acyl-carrier protein]	C05746	3-Oxohexanoyl-[acp];	2.3.1.179	beta-ketoacyl-acyl-carrier-protein synthase II;	map00061	Fatty acid biosynthesis	bbr	ssp	mxa	lil	hpa	lin	eco	son	ama	bba	bpa	bbr	gka	lpf	ngo	sme	cte	cli	tdn	aae	hth	nam
		x	C04688	(3R)-3-Hydroxytetradecanoyl-[acyl-carrier protein];	C05760	trans-Tetradec-2-enoyl-[acp];	2.3.1.-	<Transferases; Acyltransferases; Transferring groups other than amino-acyl groups>	map00061	Fatty acid biosynthesis	bbr	ssp	mxa	lil	hpa	lin	eco	son		bba	bpa	bbr	gka	lpf	ngo	sme	cte	cli	tdn	aae	hth	nam
		x	C05760	trans-Tetradec-2-enoyl-[acp];	C05761	Tetradecanoyl-[acp];	2.3.1.-	<Transferases; Acyltransferases; Transferring groups other than amino-acyl groups>	map00061	Fatty acid biosynthesis	bbr	ssp	mxa	lil	hpa	lin	eco	son		bba	bpa	bbr	gka	lpf	ngo	sme	cte	cli	tdn	aae	hth	nam
		x	C05751	trans-Oct-2-enoyl-[acp];	C05752	Octanoyl-[acp];	2.3.1.-	<Transferases; Acyltransferases; Transferring groups other than amino-acyl groups>	map00061	Fatty acid biosynthesis	bbr	ssp	mxa	lil	hpa	lin	eco	son		bba	bpa	bbr	gka	lpf	ngo	sme	cte	cli	tdn	aae	hth	nam
		x	C00022	Pyruvate;	C05125	2-(alpha-Hydroxyethyl)thiamine diphosphate;	1.2.4.1	pyruvate dehydrogenase (acetyl-transferring);	map00010; map00020; map00290; map00620; map00650	Glycolysis / Gluconeogenesis; Citrate cycle (TCA cycle); Valine, leucine and isoleucine biosynthesis; Pyruvate metabolism; Butanoate metabolism	bbr	ssp	mxa	lil		lin	eco	son	ama	bba	bpa	bbr	gka	lpf	ngo	sme					hth	nam
		x	C01209	Malonyl-[acyl-carrier protein]	C05744	Acetoacetyl-[acp];	2.3.1.179	beta-ketoacyl-acyl-carrier-protein synthase II;	map00061	Fatty acid biosynthesis	bbr	ssp	mxa	lil	hpa	lin	eco	son	ama	bba	bpa	bbr	gka	lpf	ngo	sme	cte	cli	tdn	aae	hth	nam
		x	C00022	Pyruvate;	C00074	Phosphoenolpyruvate;	2.7.1.40	pyruvate kinase;	map00010; map00620; map00710	Glycolysis / Gluconeogenesis; Pyruvate metabolism; Carbon fixation in photosynthetic organisms	bbr	ssp	mxa	lil		lin	eco	son		bba	bpa	bbr	gka	lpf	ngo	sme						nam
		x	C01209	Malonyl-[acyl-carrier protein]	C05756	3-Oxododecanoyl-[acp];	2.3.1.-	<Transferases; Acyltransferases; Transferring groups other than amino-acyl groups>	map00061	Fatty acid biosynthesis	bbr	ssp	mxa	lil	hpa	lin	eco	son		bba	bpa	bbr	gka	lpf	ngo	sme	cte	cli	tdn	aae	hth	nam
		x	C01209	Malonyl-[acyl-carrier protein]	C05750	3-Oxooctanoyl-[acp];	2.3.1.179	beta-ketoacyl-acyl-carrier-protein synthase II;	map00061	Fatty acid biosynthesis	bbr	ssp	mxa	lil	hpa	lin	eco	son	ama	bba	bpa	bbr	gka	lpf	ngo	sme	cte	cli	tdn	aae	hth	nam
		x	C00036	Oxaloacetate;	C00158	Citrate;	2.3.3.1	citrate (Si)-synthase;	map00020; map00630	Citrate cycle (TCA cycle); Glyoxylate and dicarboxylate metabolism	bbr	ssp	mxa	lil	hpa	lin	eco	son	ama	bba	bpa	bbr	gka	lpf	ngo	sme	cte	cli	tdn	aae	hth
		x	C00036	Oxaloacetate;	C00149	(S)-Malate;	1.1.1.37	malate dehydrogenase;	map00020; map00620; map00630; map00710; map00720	Citrate cycle (TCA cycle); Pyruvate metabolism; Glyoxylate and dicarboxylate metabolism; Carbon fixation in photosynthetic organisms; Reductive carboxylate cycle (CO2 fixation)	bbr	ssp	mxa	lil			eco	son	ama	bba	bpa	bbr	gka	lpf		sme	cte	cli	tdn	aae	hth	nam
		x	C00122	Fumarate;	C00149	(S)-Malate;	4.2.1.2	fumarate hydratase;	map00020; map00720	Citrate cycle (TCA cycle); Reductive carboxylate cycle (CO2 fixation)	bbr	ssp	mxa	lil	hpa	lin	eco	son	ama	bba	bpa	bbr	gka	lpf	ngo	sme	cte	cli	tdn	aae	hth	nam
		x	C00042	Succinate;	C00122	Fumarate;	1.3.99.1	succinate dehydrogenase;	map00020; map00190; map00632; map00650; map00720	Citrate cycle (TCA cycle); Oxidative phosphorylation; Benzoate degradation via CoA ligation; Butanoate metabolism; Reductive carboxylate cycle (CO2 fixation)	bbr	ssp	mxa	lil	hpa	lin	eco	son	ama	bba	bpa	bbr	gka	lpf	ngo	sme	cte	cli	tdn	aae	hth	nam
		x	C00042	Succinate;	C00091	Succinyl-CoA;	6.2.1.5	succinate---CoA ligase (ADP-forming);	map00020; map00640; map00720	Citrate cycle (TCA cycle); Propanoate metabolism; Reductive carboxylate cycle (CO2 fixation)	bbr	ssp	mxa	lil			eco	son	ama	bba	bpa	bbr	gka	lpf	ngo	sme	cte	cli	tdn	aae	hth	nam
		x	C01209	Malonyl-[acyl-carrier protein]	C05744	Acetoacetyl-[acp];	2.3.1.180	beta-ketoacyl-acyl-carrier-protein synthase III;	map00061	Fatty acid biosynthesis	bbr	ssp	mxa	lil	hpa	lin	eco	son	ama	bba	bpa	bbr	gka	lpf	ngo	sme	cte	cli	tdn	aae	hth	nam
		x	C05746	3-Oxohexanoyl-[acp];	C05747	(R)-3-Hydroxyhexanoyl-[acp];	2.3.1.-	<Transferases; Acyltransferases; Transferring groups other than amino-acyl groups>	map00061	Fatty acid biosynthesis	bbr	ssp	mxa	lil	hpa	lin	eco	son		bba	bpa	bbr	gka	lpf	ngo	sme	cte	cli	tdn	aae	hth	nam
		x	C00024	Acetyl-CoA;	C05263	3-Oxododecanoyl-CoA	2.3.1.16	acetyl-CoA C-acyltransferase;	map00062; map00071	Fatty acid elongation in mitochondria; Fatty acid metabolism	bbr	ssp	mxa	lil			eco	son		bba	bpa	bbr	gka			sme
		x	C05263	3-Oxododecanoyl-CoA	C05274	Decanoyl-CoA	2.3.1.16	acetyl-CoA C-acyltransferase;	map00062; map00071	Fatty acid elongation in mitochondria; Fatty acid metabolism	bbr	ssp	mxa	lil			eco	son		bba	bpa	bbr	gka			sme
		x	C04619	(3R)-3-Hydroxydecanoyl-[acyl-carrier protein];	C05753	3-Oxodecanoyl-[acp];	1.1.1.100	3-oxoacyl-[acyl-carrier-protein] reductase;	map00061	Fatty acid biosynthesis	bbr	ssp	mxa	lil	hpa	lin	eco	son	ama	bba	bpa	bbr	gka	lpf	ngo	sme	cte	cli	tdn	aae	hth	nam
		x	C00022	Pyruvate;	C00024	Acetyl-CoA;	1.2.4.1	pyruvate dehydrogenase (acetyl-transferring);	map00010; map00020; map00290; map00620; map00650	Glycolysis / Gluconeogenesis; Citrate cycle (TCA cycle); Valine, leucine and isoleucine biosynthesis; Pyruvate metabolism; Butanoate metabolism	bbr	ssp	mxa	lil		lin	eco	son	ama	bba	bpa	bbr	gka	lpf	ngo	sme					hth	nam
		x	C00074	Phosphoenolpyruvate;	C04691	2-Dehydro-3-deoxy-D-arabino-heptonate 7-phosphate;	2.5.1.54	3-deoxy-7-phosphoheptulonate synthase;	map00400	Phenylalanine, tyrosine and tryptophan biosynthesis	bbr	ssp	mxa	lil	hpa	lin	eco	son		bba	bpa	bbr	gka	lpf	ngo	sme	cte	cli	tdn			nam
		x	C00944	3-Dehydroquinate;	C04691	2-Dehydro-3-deoxy-D-arabino-heptonate 7-phosphate;	4.2.3.4	3-dehydroquinate synthase;	map00400	Phenylalanine, tyrosine and tryptophan biosynthesis	bbr	ssp	mxa	lil	hpa	lin	eco	son		bba	bpa	bbr	gka	lpf	ngo	sme	cte	cli	tdn			nam
		x	C00279	D-Erythrose 4-phosphate	C04691	2-Dehydro-3-deoxy-D-arabino-heptonate 7-phosphate;	2.5.1.54	3-deoxy-7-phosphoheptulonate synthase;	map00400	Phenylalanine, tyrosine and tryptophan biosynthesis	bbr	ssp	mxa	lil	hpa	lin	eco	son		bba	bpa	bbr	gka	lpf	ngo	sme	cte	cli	tdn			nam
		x	C00279	D-Erythrose 4-phosphate	C05382	Sedoheptulose 7-phosphate;	2.2.1.2	transaldolase;	map00030	Pentose phosphate pathway	bbr	ssp	mxa	lil	hpa	lin	eco	son	ama	bba	bpa	bbr	gka		ngo	sme	cte	cli	tdn	aae	hth	nam
		x	C00231	D-Xylulose 5-phosphate	C05382	Sedoheptulose 7-phosphate;	2.2.1.1	transketolase;	map00030; map00710	Pentose phosphate pathway; Carbon fixation in photosynthetic organisms	bbr	ssp	mxa	lil	hpa	lin	eco	son	ama	bba	bpa	bbr	gka	lpf	ngo	sme	cte	cli	tdn	aae	hth	nam
		x	C00199	D-Ribulose 5-phosphate	C00231	D-Xylulose 5-phosphate	5.1.3.1	ribulose-phosphate 3-epimerase;	map00030; map00040; map00710	Pentose phosphate pathway; Pentose and glucuronate interconversions; Carbon fixation in photosynthetic organisms	bbr	ssp	mxa	lil	hpa	lin	eco	son	ama	bba	bpa	bbr	gka	lpf	ngo	sme	cte	cli	tdn	aae	hth	nam
		x	C00118	D-Glyceraldehyde 3-phosphate;	C00231	D-Xylulose 5-phosphate	2.2.1.1	transketolase;	map00030; map00710	Pentose phosphate pathway; Carbon fixation in photosynthetic organisms	bbr	ssp	mxa	lil	hpa	lin	eco	son	ama	bba	bpa	bbr	gka	lpf	ngo	sme	cte	cli	tdn	aae	hth	nam
		x	C00118	D-Glyceraldehyde 3-phosphate;	C05345	beta-D-Fructose 6-phosphate	2.2.1.2	transaldolase;	map00030	Pentose phosphate pathway	bbr	ssp	mxa	lil	hpa	lin	eco	son	ama	bba	bpa	bbr	gka		ngo	sme	cte	cli	tdn	aae	hth	nam
		x	C00668	alpha-D-Glucose 6-phosphate	C05345	beta-D-Fructose 6-phosphate	5.3.1.9	glucose-6-phosphate isomerase;	map00010; map00030; map00500; map00520	Glycolysis / Gluconeogenesis; Pentose phosphate pathway; Starch and sucrose metabolism; Amino sugar and nucleotide sugar metabolism	bbr	ssp	mxa	lil	hpa	lin	eco	son		bba	bpa	bbr	gka	lpf	ngo	sme	cte	cli	tdn	aae	hth	nam
		x	C00231	D-Xylulose 5-phosphate	C05345	beta-D-Fructose 6-phosphate	2.2.1.1	transketolase;	map00030	Pentose phosphate pathway	bbr	ssp	mxa	lil	hpa	lin	eco	son	ama	bba	bpa	bbr	gka	lpf	ngo	sme	cte	cli	tdn	aae	hth	nam
		x	C00118	D-Glyceraldehyde 3-phosphate;	C00236	3-Phospho-D-glyceroyl phosphate;	1.2.1.12	glyceraldehyde-3-phosphate dehydrogenase (phosphorylating);	map00010	Glycolysis / Gluconeogenesis	bbr	ssp	mxa	lil	hpa	lin	eco	son	ama	bba	bpa	bbr	gka	lpf	ngo	sme	cte	cli	tdn	aae	hth	nam
		x	C00118	D-Glyceraldehyde 3-phosphate;	C00279	D-Erythrose 4-phosphate	2.2.1.1	transketolase;	map00030; map00710	Pentose phosphate pathway; Carbon fixation in photosynthetic organisms	bbr	ssp	mxa	lil	hpa	lin	eco	son	ama	bba	bpa	bbr	gka	lpf	ngo	sme	cte	cli	tdn	aae	hth	nam
		x	C00668	alpha-D-Glucose 6-phosphate	C01172	beta-D-Glucose 6-phosphate	5.3.1.9	glucose-6-phosphate isomerase;	map00010; map00030; map00500	Glycolysis / Gluconeogenesis; Pentose phosphate pathway; Starch and sucrose metabolism	bbr	ssp	mxa	lil	hpa	lin	eco	son		bba	bpa	bbr	gka	lpf	ngo	sme	cte	cli	tdn	aae	hth	nam
		x	C00118	D-Glyceraldehyde 3-phosphate;	C00279	D-Erythrose 4-phosphate	2.2.1.2	transaldolase;	map00030	Pentose phosphate pathway	bbr	ssp	mxa	lil	hpa	lin	eco	son	ama	bba	bpa	bbr	gka		ngo	sme	cte	cli	tdn	aae	hth	nam
		x	C00197	3-Phospho-D-glycerate;	C00236	3-Phospho-D-glyceroyl phosphate;	2.7.2.3	phosphoglycerate kinase;	map00010; map00710	Glycolysis / Gluconeogenesis; Carbon fixation in photosynthetic organisms	bbr	ssp	mxa	lil	hpa	lin	eco	son	ama	bba	bpa	bbr	gka	lpf	ngo	sme	cte	cli	tdn	aae	hth	nam
		x	C00197	3-Phospho-D-glycerate;	C00631	2-Phospho-D-glycerate;	5.4.2.1	phosphoglycerate mutase;	map00010	Glycolysis / Gluconeogenesis	bbr	ssp	mxa	lil	hpa	lin	eco	son	ama	bba	bpa	bbr	gka	lpf	ngo	sme	cte	cli	tdn	aae	hth	nam
		x	C00197	3-Phospho-D-glycerate;	C03232	3-Phosphonooxypyruvate;	1.1.1.95	phosphoglycerate dehydrogenase;	map00260	Glycine, serine and threonine metabolism	bbr	ssp	mxa	lil	hpa	lin	eco	son		bba	bpa	bbr	gka	lpf		sme		cli	tdn	aae	hth	nam
		x	C01172	beta-D-Glucose 6-phosphate	C05345	beta-D-Fructose 6-phosphate	5.3.1.9	glucose-6-phosphate isomerase;	map00010; map00030; map00500	Glycolysis / Gluconeogenesis; Pentose phosphate pathway; Starch and sucrose metabolism	bbr	ssp	mxa	lil	hpa	lin	eco	son		bba	bpa	bbr	gka	lpf	ngo	sme	cte	cli	tdn	aae	hth	nam
		x	C00118	D-Glyceraldehyde 3-phosphate;	C05378	beta-D-Fructose 1,6-bisphosphate	4.1.2.13	fructose-bisphosphate aldolase;	map00010; map00030; map00051	Glycolysis / Gluconeogenesis; Pentose phosphate pathway; Fructose and mannose metabolism	bbr	ssp	mxa	lil	hpa	lin	eco	son	ama	bba	bpa	bbr	gka	lpf	ngo	sme	cte	cli	tdn	aae	hth	nam
		x	C00117	D-Ribose 5-phosphate;	C00118	D-Glyceraldehyde 3-phosphate;	2.2.1.1	transketolase;	map00030; map00710	Pentose phosphate pathway; Carbon fixation in photosynthetic organisms	bbr	ssp	mxa	lil	hpa	lin	eco	son	ama	bba	bpa	bbr	gka	lpf	ngo	sme	cte	cli	tdn	aae	hth	nam
		x	C00117	D-Ribose 5-phosphate;	C00119	5-Phospho-alpha-D-ribose 1-diphosphate;	2.7.6.1	ribose-phosphate diphosphokinase;	map00030; map00230	Pentose phosphate pathway; Purine metabolism	bbr	ssp	mxa	lil	hpa	lin	eco	son	ama	bba	bpa	bbr	gka	lpf	ngo	sme	cte	cli	tdn	aae	hth	nam
		x	C00119	5-Phospho-alpha-D-ribose 1-diphosphate;	C03090	5-Phosphoribosylamine;	2.4.2.14	amidophosphoribosyltransferase;	map00230	Purine metabolism	bbr	ssp	mxa	lil		lin	eco	son	ama	bba	bpa	bbr	gka	lpf	ngo	sme	cte	cli	tdn	aae	hth	nam
		x	C03090	5-Phosphoribosylamine;	C03838	5'-Phosphoribosylglycinamide;	6.3.4.13	phosphoribosylamine---glycine ligase;	map00230	Purine metabolism	bbr	ssp	mxa	lil	hpa	lin	eco	son	ama	bba	bpa	bbr	gka	lpf	ngo	sme	cte	cli	tdn	aae	hth	nam
		x	C05345	beta-D-Fructose 6-phosphate	C05378	beta-D-Fructose 1,6-bisphosphate	3.1.3.11	fructose-bisphosphatase;	map00010; map00030; map00051	Glycolysis / Gluconeogenesis; Pentose phosphate pathway; Fructose and mannose metabolism	bbr	ssp	mxa	lil	hpa	lin	eco	son	ama	bba	bpa	bbr	gka		ngo	sme	cte	cli	tdn			nam
		x	C01209	Malonyl-[acyl-carrier protein]	C05762	3-Oxohexadecanoyl-[acp];	2.3.1.179	beta-ketoacyl-acyl-carrier-protein synthase II;	map00061	Fatty acid biosynthesis	bbr	ssp	mxa	lil	hpa	lin	eco	son	ama	bba	bpa	bbr	gka	lpf	ngo	sme	cte	cli	tdn	aae	hth	nam
		x	C04619	(3R)-3-Hydroxydecanoyl-[acyl-carrier protein];	C05754	trans-Dec-2-enoyl-[acp];	2.3.1.-	<Transferases; Acyltransferases; Transferring groups other than amino-acyl groups>	map00061	Fatty acid biosynthesis	bbr	ssp	mxa	lil	hpa	lin	eco	son		bba	bpa	bbr	gka	lpf	ngo	sme	cte	cli	tdn	aae	hth	nam
		x	C00119	5-Phospho-alpha-D-ribose 1-diphosphate;	C01103	Orotidine 5'-phosphate;	2.4.2.10	orotate phosphoribosyltransferase;	map00240	Pyrimidine metabolism	bbr	ssp	mxa	lil	hpa	lin	eco	son	ama	bba	bpa	bbr	gka	lpf	ngo	sme	cte	cli	tdn	aae	hth	nam
		x	C00105	UMP;	C01103	Orotidine 5'-phosphate;	4.1.1.23	orotidine-5'-phosphate decarboxylase;	map00240	Pyrimidine metabolism	bbr	ssp	mxa	lil	hpa	lin	eco	son	ama	bba	bpa	bbr	gka	lpf	ngo	sme	cte	cli	tdn	aae	hth	nam
		x	C00015	UDP;	C00105	UMP;	2.7.4.14	cytidylate kinase;	map00240	Pyrimidine metabolism	bbr	ssp	mxa	lil		lin	eco	son	ama	bba	bpa	bbr	gka	lpf	ngo	sme	cte	cli		aae	hth
		x	C00015	UDP;	C00075	UTP;	2.7.4.6	nucleoside-diphosphate kinase;	map00240	Pyrimidine metabolism	bbr	ssp	mxa	lil	hpa	lin	eco	son	ama	bba	bpa	bbr	gka	lpf	ngo	sme	cte	cli	tdn	aae	hth	nam
		x	C00063	CTP;	C00075	UTP;	6.3.4.2	CTP synthase;	map00240	Pyrimidine metabolism	bbr	ssp	mxa	lil	hpa	lin	eco	son	ama	bba	bpa	bbr	gka	lpf	ngo	sme	cte	cli	tdn	aae	hth	nam
		x	C00063	CTP;	C00112	CDP;	2.7.4.6	nucleoside-diphosphate kinase;	map00240	Pyrimidine metabolism	bbr	ssp	mxa	lil	hpa	lin	eco	son	ama	bba	bpa	bbr	gka	lpf	ngo	sme	cte	cli	tdn	aae	hth	nam
		x	C00055	CMP;	C00112	CDP;	2.7.4.14	cytidylate kinase;	map00240	Pyrimidine metabolism	bbr	ssp	mxa	lil		lin	eco	son	ama	bba	bpa	bbr	gka	lpf	ngo	sme	cte	cli		aae	hth
		x	C00046	RNA;	C00063	CTP;	2.7.7.6	DNA-directed RNA polymerase;	map00240	Pyrimidine metabolism	bbr	ssp	mxa	lil	hpa	lin	eco	son	ama	bba	bpa	bbr	gka	lpf	ngo	sme	cte	cli	tdn	aae	hth	nam
		x	C00002	ATP;	C00046	RNA;	2.7.7.6	DNA-directed RNA polymerase;	map00230	Purine metabolism	bbr	ssp	mxa	lil	hpa	lin	eco	son	ama	bba	bpa	bbr	gka	lpf	ngo	sme	cte	cli	tdn	aae	hth	nam
		x	C00044	GTP;	C00046	RNA;	2.7.7.6	DNA-directed RNA polymerase;	map00230	Purine metabolism	bbr	ssp	mxa	lil	hpa	lin	eco	son	ama	bba	bpa	bbr	gka	lpf	ngo	sme	cte	cli	tdn	aae	hth	nam
		x	C00044	GTP;	C01304	2,5-Diamino-6-(5'-phosphoribosylamino)-4-pyrimidineone	3.5.4.25	GTP cyclohydrolase II;	map00740	Riboflavin metabolism	bbr	ssp	mxa	lil	hpa		eco	son	ama	bba	bpa	bbr	gka	lpf	ngo	sme	cte	cli	tdn	aae	hth	nam
		x	C00035	GDP;	C00044	GTP;	2.7.4.6	nucleoside-diphosphate kinase;	map00230	Purine metabolism	bbr	ssp	mxa	lil	hpa	lin	eco	son	ama	bba	bpa	bbr	gka	lpf	ngo	sme	cte	cli	tdn	aae	hth	nam
		x	C00035	GDP;	C00361	dGDP;	1.17.4.1	ribonucleoside-diphosphate reductase;	map00230	Purine metabolism	bbr	ssp	mxa	lil	hpa	lin	eco	son	ama	bba	bpa	bbr	gka	lpf	ngo	sme	cte	cli	tdn	aae	hth	nam
		x	C00286	dGTP;	C00361	dGDP;	2.7.1.40	pyruvate kinase;	map00230	Purine metabolism	bbr	ssp	mxa	lil		lin	eco	son		bba	bpa	bbr	gka	lpf	ngo	sme						nam
		x	C00039	DNA;	C00286	dGTP;	2.7.7.7	DNA-directed DNA polymerase;	map00230	Purine metabolism	bbr	ssp	mxa	lil	hpa	lin	eco	son	ama	bba	bpa	bbr	gka	lpf	ngo	sme	cte	cli	tdn	aae	hth	nam
		x	C00039	DNA;	C00458	dCTP;	2.7.7.7	DNA-directed DNA polymerase;	map00240	Pyrimidine metabolism	bbr	ssp	mxa	lil	hpa	lin	eco	son	ama	bba	bpa	bbr	gka	lpf	ngo	sme	cte	cli	tdn	aae	hth	nam
		x	C00458	dCTP;	C00705	dCDP;	2.7.4.6	nucleoside-diphosphate kinase;	map00240	Pyrimidine metabolism	bbr	ssp	mxa	lil	hpa	lin	eco	son	ama	bba	bpa	bbr	gka	lpf	ngo	sme	cte	cli	tdn	aae	hth	nam
		x	C00239	dCMP;	C00705	dCDP;	2.7.4.14	cytidylate kinase;	map00240	Pyrimidine metabolism	bbr	ssp	mxa	lil		lin	eco	son	ama	bba	bpa	bbr	gka	lpf	ngo	sme	cte	cli		aae	hth
		x	C00039	DNA;	C00459	dTTP;	2.7.7.7	DNA-directed DNA polymerase;	map00240	Pyrimidine metabolism	bbr	ssp	mxa	lil	hpa	lin	eco	son	ama	bba	bpa	bbr	gka	lpf	ngo	sme	cte	cli	tdn	aae	hth	nam
		x	C00363	dTDP;	C00459	dTTP;	2.7.4.6	nucleoside-diphosphate kinase;	map00240	Pyrimidine metabolism	bbr	ssp	mxa	lil	hpa	lin	eco	son	ama	bba	bpa	bbr	gka	lpf	ngo	sme	cte	cli	tdn	aae	hth	nam
		x	C00363	dTDP;	C00364	dTMP;	2.7.4.9	dTMP kinase;	map00240	Pyrimidine metabolism	bbr	ssp	mxa	lil	hpa	lin	eco	son	ama	bba	bpa	bbr	gka	lpf	ngo	sme	cte	cli	tdn	aae	hth	nam
		x	C00035	GDP;	C00144	GMP;	2.7.4.8	guanylate kinase;	map00230	Purine metabolism	bbr	ssp	mxa	lil	hpa	lin	eco	son	ama	bba	bpa	bbr	gka	lpf	ngo	sme	cte	cli	tdn	aae	hth	nam
		x	C00144	GMP;	C00242	Guanine;	2.4.2.7	adenine phosphoribosyltransferase;	map00230	Purine metabolism	bbr	ssp	mxa	lil	hpa	lin	eco	son		bba	bpa	bbr	gka		ngo	sme	cte	cli	tdn			nam
		x	C00286	dGTP;	C00361	dGDP;	2.7.4.6	nucleoside-diphosphate kinase;	map00230	Purine metabolism	bbr	ssp	mxa	lil	hpa	lin	eco	son	ama	bba	bpa	bbr	gka	lpf	ngo	sme	cte	cli	tdn	aae	hth	nam
		x	C00364	dTMP;	C00365	dUMP;	2.1.1.45	thymidylate synthase;	map00240	Pyrimidine metabolism	bbr	ssp	mxa	lil		lin	eco	son		bba	bpa	bbr	gka	lpf	ngo	sme
		x	C00365	dUMP;	C01346	dUDP;	2.7.4.9	dTMP kinase;	map00240	Pyrimidine metabolism	bbr	ssp	mxa	lil	hpa	lin	eco	son	ama	bba	bpa	bbr	gka	lpf	ngo	sme	cte	cli	tdn	aae	hth	nam
		x	C00460	dUTP;	C01346	dUDP;	2.7.4.6	nucleoside-diphosphate kinase;	map00240	Pyrimidine metabolism	bbr	ssp	mxa	lil	hpa	lin	eco	son	ama	bba	bpa	bbr	gka	lpf	ngo	sme	cte	cli	tdn	aae	hth	nam
		x	C00039	DNA;	C00131	dATP;	2.7.7.7	DNA-directed DNA polymerase;	map00230	Purine metabolism	bbr	ssp	mxa	lil	hpa	lin	eco	son	ama	bba	bpa	bbr	gka	lpf	ngo	sme	cte	cli	tdn	aae	hth	nam
		x	C00131	dATP;	C00206	dADP;	2.7.1.40	pyruvate kinase;	map00230	Purine metabolism	bbr	ssp	mxa	lil		lin	eco	son		bba	bpa	bbr	gka	lpf	ngo	sme						nam
		x	C00206	dADP;	C00360	dAMP;	2.7.4.3	adenylate kinase;	map00230	Purine metabolism	bbr	ssp	mxa	lil	hpa	lin	eco	son	ama	bba	bpa	bbr	gka	lpf	ngo	sme	cte	cli	tdn	aae	hth	nam
		x	C00008	ADP;	C00206	dADP;	1.17.4.1	ribonucleoside-diphosphate reductase;	map00230	Purine metabolism	bbr	ssp	mxa	lil	hpa	lin	eco	son	ama	bba	bpa	bbr	gka	lpf	ngo	sme	cte	cli	tdn	aae	hth	nam
		x	C04633	(3R)-3-Hydroxypalmitoyl-[acyl-carrier protein];	C05762	3-Oxohexadecanoyl-[acp];	1.1.1.100	3-oxoacyl-[acyl-carrier-protein] reductase;	map00061	Fatty acid biosynthesis	bbr	ssp	mxa	lil	hpa	lin	eco	son	ama	bba	bpa	bbr	gka	lpf	ngo	sme	cte	cli	tdn	aae	hth	nam
		x	C00361	dGDP;	C00362	dGMP;	2.7.4.8	guanylate kinase;	map00230	Purine metabolism	bbr	ssp	mxa	lil	hpa	lin	eco	son	ama	bba	bpa	bbr	gka	lpf	ngo	sme	cte	cli	tdn	aae	hth	nam
		x	C05756	3-Oxododecanoyl-[acp];	C05757	(R)-3-Hydroxydodecanoyl-[acp];	1.1.1.100	3-oxoacyl-[acyl-carrier-protein] reductase;	map00061	Fatty acid biosynthesis	bbr	ssp	mxa	lil	hpa	lin	eco	son	ama	bba	bpa	bbr	gka	lpf	ngo	sme	cte	cli	tdn	aae	hth	nam
		x	C04618	(3R)-3-Hydroxybutanoyl-[acyl-carrier protein];	C05744	Acetoacetyl-[acp];	2.3.1.-	<Transferases; Acyltransferases; Transferring groups other than amino-acyl groups>	map00061	Fatty acid biosynthesis	bbr	ssp	mxa	lil	hpa	lin	eco	son		bba	bpa	bbr	gka	lpf	ngo	sme	cte	cli	tdn	aae	hth	nam
		x	C04246	But-2-enoyl-[acyl-carrier protein]	C04618	(3R)-3-Hydroxybutanoyl-[acyl-carrier protein];	2.3.1.-	<Transferases; Acyltransferases; Transferring groups other than amino-acyl groups>	map00061	Fatty acid biosynthesis	bbr	ssp	mxa	lil	hpa	lin	eco	son		bba	bpa	bbr	gka	lpf	ngo	sme	cte	cli	tdn	aae	hth	nam
		x	C04246	But-2-enoyl-[acyl-carrier protein]	C05745	Butyryl-[acp];	2.3.1.-	<Transferases; Acyltransferases; Transferring groups other than amino-acyl groups>	map00061	Fatty acid biosynthesis	bbr	ssp	mxa	lil	hpa	lin	eco	son		bba	bpa	bbr	gka	lpf	ngo	sme	cte	cli	tdn	aae	hth	nam
		x	C00131	dATP;	C00206	dADP;	2.7.4.6	nucleoside-diphosphate kinase;	map00230	Purine metabolism	bbr	ssp	mxa	lil	hpa	lin	eco	son	ama	bba	bpa	bbr	gka	lpf	ngo	sme	cte	cli	tdn	aae	hth	nam
		x	C00352	D-Glucosamine 6-phosphate;	C05345	beta-D-Fructose 6-phosphate	3.5.1.-	<Hydrolases; Acting on carbon-nitrogen bonds, other than peptide bonds; In linear amides>	map00520	Amino sugar and nucleotide sugar metabolism	bbr	ssp	mxa	lil	hpa	lin	eco	son		bba	bpa	bbr	gka	lpf	ngo	sme	cte	cli	tdn	aae	hth	nam
		x	C05745	Butyryl-[acp];	C05746	3-Oxohexanoyl-[acp];	2.3.1.179	beta-ketoacyl-acyl-carrier-protein synthase II;	map00061	Fatty acid biosynthesis	bbr	ssp	mxa	lil	hpa	lin	eco	son	ama	bba	bpa	bbr	gka	lpf	ngo	sme	cte	cli	tdn	aae	hth	nam
		x	C01268	5-Amino-6-(5'-phosphoribosylamino)uracil;	C01304	2,5-Diamino-6-(5'-phosphoribosylamino)-4-pyrimidineone	3.5.4.26	diaminohydroxyphosphoribosylaminopyrimidine deaminase	map00740	Riboflavin metabolism	bbr	ssp	mxa	lil	hpa		eco	son	ama	bba	bpa	bbr	gka	lpf	ngo	sme	cte	cli	tdn	aae	hth	nam
		x	C01268	5-Amino-6-(5'-phosphoribosylamino)uracil;	C04454	5-Amino-6-(5'-phosphoribitylamino)uracil;	1.1.1.193	5-amino-6-(5-phosphoribosylamino)uracil reductase;	map00740	Riboflavin metabolism	bbr	ssp	mxa	lil	hpa		eco	son	ama	bba	bpa	bbr	gka	lpf	ngo	sme	cte	cli	tdn	aae	hth	nam
		x	C00091	Succinyl-CoA;	C16254	[Dihydrolipoyllysine-residue succinyltransferase]	2.3.1.61	dihydrolipoyllysine-residue succinyltransferase;	map00020	Citrate cycle (TCA cycle)	bbr	ssp	mxa	lil			eco	son	ama	bba	bpa	bbr	gka	lpf	ngo	sme		cli
		x	C15973	Enzyme N6-(dihydrolipoyl)lysine;	C16254	[Dihydrolipoyllysine-residue succinyltransferase]	2.3.1.61	dihydrolipoyllysine-residue succinyltransferase;	map00020	Citrate cycle (TCA cycle)	bbr	ssp	mxa	lil			eco	son	ama	bba	bpa	bbr	gka	lpf	ngo	sme		cli
		x	C15972	Enzyme N6-(lipoyl)lysine;	C15973	Enzyme N6-(dihydrolipoyl)lysine;	1.8.1.4	dihydrolipoyl dehydrogenase;	map00010; map00020; map00280; map00620	Glycolysis / Gluconeogenesis; Citrate cycle (TCA cycle); Valine, leucine and isoleucine degradation; Pyruvate metabolism	bbr	ssp	mxa	lil		lin	eco	son	ama	bba	bpa	bbr	gka	lpf	ngo	sme	cte	cli		aae	hth	nam
		x	C15972	Enzyme N6-(lipoyl)lysine;	C16254	[Dihydrolipoyllysine-residue succinyltransferase]	1.2.4.2	oxoglutarate dehydrogenase (succinyl-transferring);	map00020	Citrate cycle (TCA cycle)	bbr	ssp	mxa	lil			eco	son	ama	bba	bpa	bbr	gka	lpf	ngo	sme		cli
		x	C05752	Octanoyl-[acp];	C05753	3-Oxodecanoyl-[acp];	2.3.1.-	<Transferases; Acyltransferases; Transferring groups other than amino-acyl groups>	map00061	Fatty acid biosynthesis	bbr	ssp	mxa	lil	hpa	lin	eco	son		bba	bpa	bbr	gka	lpf	ngo	sme	cte	cli	tdn	aae	hth	nam
		x	C00144	GMP;	C00655	Xanthosine 5'-phosphate;	6.3.5.2	GMP synthase (glutamine-hydrolysing);	map00230	Purine metabolism	bbr	ssp	mxa	lil	hpa	lin	eco	son	ama	bba	bpa	bbr	gka	lpf	ngo	sme	cte	cli	tdn	aae	hth	nam
		x	C00130	IMP;	C00655	Xanthosine 5'-phosphate;	1.1.1.205	IMP dehydrogenase;	map00230	Purine metabolism	bbr	ssp	mxa	lil	hpa	lin	eco	son	ama	bba	bpa	bbr	gka	lpf	ngo	sme	cte	cli	tdn	aae	hth	nam
		x	C00130	IMP;	C04734	1-(5'-Phosphoribosyl)-5-formamido-4-imidazolecarboxamide;	3.5.4.10	IMP cyclohydrolase;	map00230	Purine metabolism	bbr	ssp	mxa	lil		lin	eco	son	ama	bba	bpa	bbr	gka	lpf	ngo	sme	cte	cli	tdn	aae	hth	nam
		x	C04677	1-(5'-Phosphoribosyl)-5-amino-4-imidazolecarboxamide;	C04734	1-(5'-Phosphoribosyl)-5-formamido-4-imidazolecarboxamide;	6.3.4.-	<Ligases; Forming carbon-nitrogen bonds; Other carbon--nitrogen ligases>	map00230	Purine metabolism	bbr	ssp	mxa	lil	hpa	lin	eco	son	ama	bba	bpa	bbr	gka	lpf	ngo	sme	cte	cli	tdn	aae	hth	nam
		x	C04677	1-(5'-Phosphoribosyl)-5-amino-4-imidazolecarboxamide;	C04823	1-(5'-Phosphoribosyl)-5-amino-4-(N-succinocarboxamide)-imidazole;	4.3.2.2	adenylosuccinate lyase;	map00230	Purine metabolism	bbr	ssp	mxa	lil	hpa	lin	eco	son	ama	bba	bpa	bbr	gka	lpf	ngo	sme	cte	cli	tdn	aae	hth	nam
		x	C04751	1-(5-Phospho-D-ribosyl)-5-amino-4-imidazolecarboxylate;	C04823	1-(5'-Phosphoribosyl)-5-amino-4-(N-succinocarboxamide)-imidazole;	6.3.2.6	phosphoribosylaminoimidazolesuccinocarboxamide synthase;	map00230	Purine metabolism	bbr	ssp	mxa	lil		lin	eco	son	ama	bba	bpa	bbr	gka	lpf	ngo	sme	cte	cli	tdn	aae	hth	nam
		x	C04751	1-(5-Phospho-D-ribosyl)-5-amino-4-imidazolecarboxylate;	C15667	5-Carboxyamino-1-(5-phospho-D-ribosyl)imidazole	5.4.99.18	5-(carboxyamino)imidazole ribonucleotide mutase;	map00230	Purine metabolism	bbr	ssp	mxa	lil		lin	eco	son	ama	bba	bpa	bbr	gka	lpf	ngo	sme	cte	cli	tdn	aae	hth	nam
		x	C00130	IMP;	C04734	1-(5'-Phosphoribosyl)-5-formamido-4-imidazolecarboxamide;	2.1.2.3	phosphoribosylaminoimidazolecarboxamide formyltransferase;	map00230	Purine metabolism	bbr	ssp	mxa	lil		lin	eco	son	ama	bba	bpa	bbr	gka	lpf	ngo	sme	cte	cli	tdn	aae	hth	nam
		x	C00130	IMP;	C03794	N6-(1,2-Dicarboxyethyl)-AMP;	6.3.4.4	adenylosuccinate synthase;	map00230	Purine metabolism	bbr	ssp	mxa	lil	hpa	lin	eco	son	ama	bba	bpa	bbr	gka	lpf	ngo	sme	cte	cli	tdn	aae	hth	nam
		x	C00020	AMP;	C03794	N6-(1,2-Dicarboxyethyl)-AMP;	4.3.2.2	adenylosuccinate lyase;	map00230	Purine metabolism	bbr	ssp	mxa	lil	hpa	lin	eco	son	ama	bba	bpa	bbr	gka	lpf	ngo	sme	cte	cli	tdn	aae	hth	nam
		x	C00020	AMP;	C00147	Adenine;	2.4.2.7	adenine phosphoribosyltransferase;	map00230	Purine metabolism	bbr	ssp	mxa	lil	hpa	lin	eco	son		bba	bpa	bbr	gka		ngo	sme	cte	cli	tdn			nam
		x	C04677	1-(5'-Phosphoribosyl)-5-amino-4-imidazolecarboxamide;	C04734	1-(5'-Phosphoribosyl)-5-formamido-4-imidazolecarboxamide;	2.1.2.3	phosphoribosylaminoimidazolecarboxamide formyltransferase;	map00230	Purine metabolism	bbr	ssp	mxa	lil		lin	eco	son	ama	bba	bpa	bbr	gka	lpf	ngo	sme	cte	cli	tdn	aae	hth	nam
		x	C00046	RNA;	C00075	UTP;	2.7.7.6	DNA-directed RNA polymerase;	map00240	Pyrimidine metabolism	bbr	ssp	mxa	lil	hpa	lin	eco	son	ama	bba	bpa	bbr	gka	lpf	ngo	sme	cte	cli	tdn	aae	hth	nam
		x	C05345	beta-D-Fructose 6-phosphate	C05382	Sedoheptulose 7-phosphate;	2.2.1.2	transaldolase;	map00030	Pentose phosphate pathway	bbr	ssp	mxa	lil	hpa	lin	eco	son	ama	bba	bpa	bbr	gka		ngo	sme	cte	cli	tdn	aae	hth	nam
		x	C00279	D-Erythrose 4-phosphate	C05345	beta-D-Fructose 6-phosphate	2.2.1.1	transketolase;	map00030	Pentose phosphate pathway	bbr	ssp	mxa	lil	hpa	lin	eco	son	ama	bba	bpa	bbr	gka	lpf	ngo	sme	cte	cli	tdn	aae	hth	nam
		x	C05223	Dodecanoyl-[acyl-carrier protein];	C05758	trans-Dodec-2-enoyl-[acp];	2.3.1.-	<Transferases; Acyltransferases; Transferring groups other than amino-acyl groups>	map00061	Fatty acid biosynthesis	bbr	ssp	mxa	lil	hpa	lin	eco	son		bba	bpa	bbr	gka	lpf	ngo	sme	cte	cli	tdn	aae	hth	nam
		x	C00074	Phosphoenolpyruvate;	C00631	2-Phospho-D-glycerate;	4.2.1.11	phosphopyruvate hydratase;	map00010	Glycolysis / Gluconeogenesis	bbr	ssp	mxa	lil	hpa	lin	eco	son	ama	bba	bpa	bbr	gka	lpf	ngo	sme	cte	cli	tdn	aae	hth	nam
		x	C00024	Acetyl-CoA;	C05267	3-Oxooctanoyl-CoA	2.3.1.16	acetyl-CoA C-acyltransferase;	map00062; map00071	Fatty acid elongation in mitochondria; Fatty acid metabolism	bbr	ssp	mxa	lil			eco	son		bba	bpa	bbr	gka			sme
		x	C05267	3-Oxooctanoyl-CoA	C05270	Hexanoyl-CoA	2.3.1.16	acetyl-CoA C-acyltransferase;	map00062; map00071	Fatty acid elongation in mitochondria; Fatty acid metabolism	bbr	ssp	mxa	lil			eco	son		bba	bpa	bbr	gka			sme
		x	C00002	ATP;	C00008	ADP;	2.7.4.6	nucleoside-diphosphate kinase;	map00230	Purine metabolism	bbr	ssp	mxa	lil	hpa	lin	eco	son	ama	bba	bpa	bbr	gka	lpf	ngo	sme	cte	cli	tdn	aae	hth	nam
		x	C00002	ATP;	C00008	ADP;	2.7.1.40	pyruvate kinase;	map00230	Purine metabolism	bbr	ssp	mxa	lil		lin	eco	son		bba	bpa	bbr	gka	lpf	ngo	sme						nam
		x	C00311	Isocitrate;	C00417	cis-Aconitate;	4.2.1.3	aconitate hydratase;	map00020; map00630; map00720	Citrate cycle (TCA cycle); Glyoxylate and dicarboxylate metabolism; Reductive carboxylate cycle (CO2 fixation)	bbr	ssp	mxa	lil	hpa	lin	eco	son	ama	bba	bpa	bbr	gka	lpf	ngo	sme	cte	cli	tdn	aae	hth	nam
		x	C00111	Glycerone phosphate;	C00118	D-Glyceraldehyde 3-phosphate;	5.3.1.1	triose-phosphate isomerase;	map00010; map00051; map00562; map00710	Glycolysis / Gluconeogenesis; Fructose and mannose metabolism; Inositol phosphate metabolism; Carbon fixation in photosynthetic organisms	bbr	ssp	mxa	lil	hpa	lin	eco	son	ama	bba	bpa	bbr	gka	lpf	ngo	sme	cte	cli	tdn	aae	hth	nam
		x	C00111	Glycerone phosphate;	C01094	D-Fructose 1-phosphate	4.1.2.13	fructose-bisphosphate aldolase;	map00051	Fructose and mannose metabolism	bbr	ssp	mxa	lil	hpa	lin	eco	son	ama	bba	bpa	bbr	gka	lpf	ngo	sme	cte	cli	tdn	aae	hth	nam
		x	C00117	D-Ribose 5-phosphate;	C05382	Sedoheptulose 7-phosphate;	2.2.1.1	transketolase;	map00030; map00710	Pentose phosphate pathway; Carbon fixation in photosynthetic organisms	bbr	ssp	mxa	lil	hpa	lin	eco	son	ama	bba	bpa	bbr	gka	lpf	ngo	sme	cte	cli	tdn	aae	hth	nam
		x	C01944	Octanoyl-CoA	C05265	3-Oxodecanoyl-CoA	2.3.1.16	acetyl-CoA C-acyltransferase;	map00062; map00071	Fatty acid elongation in mitochondria; Fatty acid metabolism	bbr	ssp	mxa	lil			eco	son		bba	bpa	bbr	gka			sme
		x	C05761	Tetradecanoyl-[acp];	C05762	3-Oxohexadecanoyl-[acp];	2.3.1.-	<Transferases; Acyltransferases; Transferring groups other than amino-acyl groups>	map00061	Fatty acid biosynthesis	bbr	ssp	mxa	lil	hpa	lin	eco	son		bba	bpa	bbr	gka	lpf	ngo	sme	cte	cli	tdn	aae	hth	nam
		x	C00008	ADP;	C00020	AMP;	2.7.4.3	adenylate kinase;	map00230	Purine metabolism	bbr	ssp	mxa	lil	hpa	lin	eco	son	ama	bba	bpa	bbr	gka	lpf	ngo	sme	cte	cli	tdn	aae	hth	nam
		x	C00111	Glycerone phosphate;	C05378	beta-D-Fructose 1,6-bisphosphate	4.1.2.13	fructose-bisphosphate aldolase;	map00010; map00051	Glycolysis / Gluconeogenesis; Fructose and mannose metabolism	bbr	ssp	mxa	lil	hpa	lin	eco	son	ama	bba	bpa	bbr	gka	lpf	ngo	sme	cte	cli	tdn	aae	hth	nam
		x	C04619	(3R)-3-Hydroxydecanoyl-[acyl-carrier protein];	C05753	3-Oxodecanoyl-[acp];	2.3.1.-	<Transferases; Acyltransferases; Transferring groups other than amino-acyl groups>	map00061	Fatty acid biosynthesis	bbr	ssp	mxa	lil	hpa	lin	eco	son		bba	bpa	bbr	gka	lpf	ngo	sme	cte	cli	tdn	aae	hth	nam
		x	C00026	2-Oxoglutarate;	C16254	[Dihydrolipoyllysine-residue succinyltransferase]	1.2.4.2	oxoglutarate dehydrogenase (succinyl-transferring);	map00020	Citrate cycle (TCA cycle)	bbr	ssp	mxa	lil			eco	son	ama	bba	bpa	bbr	gka	lpf	ngo	sme		cli
		x	C00112	CDP;	C00705	dCDP;	1.17.4.1	ribonucleoside-diphosphate reductase;	map00240	Pyrimidine metabolism	bbr	ssp	mxa	lil	hpa	lin	eco	son	ama	bba	bpa	bbr	gka	lpf	ngo	sme	cte	cli	tdn	aae	hth	nam
		x	C00352	D-Glucosamine 6-phosphate;	C05345	beta-D-Fructose 6-phosphate	2.6.1.16	glutamine---fructose-6-phosphate transaminase (isomerizing);	map00520	Amino sugar and nucleotide sugar metabolism	bbr	ssp	mxa	lil	hpa	lin	eco	son	ama	bba	bpa	bbr	gka	lpf	ngo	sme	cte	cli	tdn	aae	hth	nam
		x	C04620	(3R)-3-Hydroxyoctanoyl-[acyl-carrier protein];	C05750	3-Oxooctanoyl-[acp];	1.1.1.100	3-oxoacyl-[acyl-carrier-protein] reductase;	map00061	Fatty acid biosynthesis	bbr	ssp	mxa	lil	hpa	lin	eco	son	ama	bba	bpa	bbr	gka	lpf	ngo	sme	cte	cli	tdn	aae	hth	nam
		x	C05223	Dodecanoyl-[acyl-carrier protein];	C05759	3-Oxotetradecanoyl-[acp];	2.3.1.-	<Transferases; Acyltransferases; Transferring groups other than amino-acyl groups>	map00061	Fatty acid biosynthesis	bbr	ssp	mxa	lil	hpa	lin	eco	son		bba	bpa	bbr	gka	lpf	ngo	sme	cte	cli	tdn	aae	hth	nam
		x	C00117	D-Ribose 5-phosphate;	C00199	D-Ribulose 5-phosphate	5.3.1.6	ribose-5-phosphate isomerase;	map00030; map00710	Pentose phosphate pathway; Carbon fixation in photosynthetic organisms	bbr	ssp	mxa	lil	hpa	lin	eco	son	ama	bba	bpa	bbr	gka	lpf	ngo	sme	cte	cli	tdn	aae	hth	nam
		x	C00295	Orotate;	C01103	Orotidine 5'-phosphate;	2.4.2.10	orotate phosphoribosyltransferase;	map00240	Pyrimidine metabolism	bbr	ssp	mxa	lil	hpa	lin	eco	son	ama	bba	bpa	bbr	gka	lpf	ngo	sme	cte	cli	tdn	aae	hth	nam
		x	C00295	Orotate;	C00337	(S)-Dihydroorotate;	1.3.3.1	dihydroorotate oxidase;	map00240	Pyrimidine metabolism	bbr	ssp	mxa	lil	hpa	lin	eco	son	ama	bba	bpa	bbr	gka	lpf	ngo	sme	cte	cli	tdn	aae	hth	nam
		x	C00337	(S)-Dihydroorotate;	C00438	N-Carbamoyl-L-aspartate	3.5.2.3	dihydroorotase;	map00240	Pyrimidine metabolism	bbr	ssp	mxa	lil	hpa	lin	eco	son	ama	bba	bpa	bbr	gka	lpf	ngo	sme	cte	cli	tdn	aae	hth	nam
		x	C00169	Carbamoyl phosphate	C00438	N-Carbamoyl-L-aspartate	2.1.3.2	aspartate carbamoyltransferase;	map00240; map00250	Pyrimidine metabolism; Alanine, aspartate and glutamate metabolism	bbr	ssp	mxa	lil	hpa	lin	eco	son	ama	bba	bpa	bbr	gka	lpf	ngo	sme	cte	cli	tdn	aae	hth	nam
		x	C00064	L-Glutamine;	C00169	Carbamoyl phosphate	6.3.5.5	carbamoyl-phosphate synthase (glutamine-hydrolysing);	map00240; map00250	Pyrimidine metabolism; Alanine, aspartate and glutamate metabolism	bbr	ssp	mxa	lil	hpa	lin	eco	son	ama	bba	bpa	bbr	gka	lpf	ngo	sme	cte	cli	tdn	aae	hth	nam
		x	C00025	L-Glutamate;	C00064	L-Glutamine;	6.3.1.2	glutamate---ammonia ligase;	map00250; map00330; map00910	Alanine, aspartate and glutamate metabolism; Arginine and proline metabolism; Nitrogen metabolism	bbr	ssp	mxa	lil	hpa	lin	eco	son	ama	bba	bpa	bbr	gka	lpf	ngo	sme	cte	cli	tdn	aae	hth	nam
		x	C05763	trans-Hexadec-2-enoyl-[acp];	C05764	Hexadecanoyl-[acp];	2.3.1.-	<Transferases; Acyltransferases; Transferring groups other than amino-acyl groups>	map00061	Fatty acid biosynthesis	bbr	ssp	mxa	lil	hpa	lin	eco	son		bba	bpa	bbr	gka	lpf	ngo	sme	cte	cli	tdn	aae	hth	nam
		x	C00249	Hexadecanoic acid;	C05764	Hexadecanoyl-[acp];	2.3.1.-	<Transferases; Acyltransferases; Transferring groups other than amino-acyl groups>	map00061; map01040	Fatty acid biosynthesis; Biosynthesis of unsaturated fatty acids	bbr	ssp	mxa	lil	hpa	lin	eco	son		bba	bpa	bbr	gka	lpf	ngo	sme	cte	cli	tdn	aae	hth	nam
		x	C00154	Palmitoyl-CoA;	C00249	Hexadecanoic acid;	6.2.1.3	long-chain-fatty-acid---CoA ligase;	map00071	Fatty acid metabolism	bbr	ssp	mxa	lil			eco	son		bba	bpa	bbr	gka	lpf	ngo	sme	cte	cli		aae		nam
		x	C00136	Butanoyl-CoA;	C05269	3-Oxohexanoyl-CoA;	2.3.1.16	acetyl-CoA C-acyltransferase;	map00062; map00071	Fatty acid elongation in mitochondria; Fatty acid metabolism	bbr	ssp	mxa	lil			eco	son		bba	bpa	bbr	gka			sme
		x	C03838	5'-Phosphoribosylglycinamide;	C04376	5'-Phosphoribosyl-N-formylglycinamide;	2.1.2.2	phosphoribosylglycinamide formyltransferase;	map00230	Purine metabolism	bbr	ssp	mxa	lil		lin	eco	son	ama	bba	bpa	bbr	gka	lpf	ngo	sme	cte	cli	tdn	aae	hth	nam
		x	C04376	5'-Phosphoribosyl-N-formylglycinamide;	C04640	2-(Formamido)-N1-(5'-phosphoribosyl)acetamidine;	6.3.5.3	phosphoribosylformylglycinamidine synthase;	map00230	Purine metabolism	bbr	ssp	mxa	lil		lin	eco	son	ama	bba	bpa	bbr	gka	lpf	ngo	sme	cte	cli	tdn	aae	hth	nam
		x	C03373	Aminoimidazole ribotide;	C04640	2-(Formamido)-N1-(5'-phosphoribosyl)acetamidine;	6.3.3.1	phosphoribosylformylglycinamidine cyclo-ligase;	map00230	Purine metabolism	bbr	ssp	mxa	lil		lin	eco	son	ama	bba	bpa	bbr	gka	lpf	ngo	sme	cte	cli	tdn	aae	hth	nam
		x	C05745	Butyryl-[acp];	C05746	3-Oxohexanoyl-[acp];	2.3.1.-	<Transferases; Acyltransferases; Transferring groups other than amino-acyl groups>	map00061	Fatty acid biosynthesis	bbr	ssp	mxa	lil	hpa	lin	eco	son		bba	bpa	bbr	gka	lpf	ngo	sme	cte	cli	tdn	aae	hth	nam
		x	C05761	Tetradecanoyl-[acp];	C05762	3-Oxohexadecanoyl-[acp];	2.3.1.179	beta-ketoacyl-acyl-carrier-protein synthase II;	map00061	Fatty acid biosynthesis	bbr	ssp	mxa	lil	hpa	lin	eco	son	ama	bba	bpa	bbr	gka	lpf	ngo	sme	cte	cli	tdn	aae	hth	nam
		x	C00024	Acetyl-CoA;	C00033	Acetate;	6.2.1.1	acetate---CoA ligase;	map00010; map00620; map00720	Glycolysis / Gluconeogenesis; Pyruvate metabolism; Reductive carboxylate cycle (CO2 fixation)	bbr	ssp	mxa	lil	hpa	lin	eco	son		bba	bpa	bbr	gka	lpf		sme	cte	cli	tdn	aae	hth	nam
		x	C04618	(3R)-3-Hydroxybutanoyl-[acyl-carrier protein];	C05744	Acetoacetyl-[acp];	1.1.1.100	3-oxoacyl-[acyl-carrier-protein] reductase;	map00061	Fatty acid biosynthesis	bbr	ssp	mxa	lil	hpa	lin	eco	son	ama	bba	bpa	bbr	gka	lpf	ngo	sme	cte	cli	tdn	aae	hth	nam
Subsystem 53	0.006191950464396287										bbr	ssp	mxa				eco	son	ama	bba	bpa	bbr		lpf		sme
		i	C02094	beta-Carotene	C06098	Zeaxanthin	1.14.13.-	<Oxidoreductases; Acting on paired donors with incorporation of molecular oxygen; With NADH or NADPH as one donor, and incorporation of one atom of oxygen>	map00906	Carotenoid biosynthesis	bbr	ssp	mxa				eco	son	ama	bba	bpa	bbr		lpf		sme
Subsystem 54	0.006191950464396287										bbr	ssp	mxa				eco	son	ama	bba	bpa	bbr		lpf		sme
		i	C00951	Estradiol;	C05141	Estriol;	1.14.13.-	<Oxidoreductases; Acting on paired donors with incorporation of molecular oxygen; With NADH or NADPH as one donor, and incorporation of one atom of oxygen>	map00140	Steroid hormone biosynthesis	bbr	ssp	mxa				eco	son	ama	bba	bpa	bbr		lpf		sme
Subsystem 55	0.006191950464396287										bbr	ssp	mxa				eco	son	ama	bba	bpa	bbr		lpf		sme
		i	C00726	Nitrile;	C05712	Cyanohydrin	1.14.13.-	<Oxidoreductases; Acting on paired donors with incorporation of molecular oxygen; With NADH or NADPH as one donor, and incorporation of one atom of oxygen>	map00460	Cyanoamino acid metabolism	bbr	ssp	mxa				eco	son	ama	bba	bpa	bbr		lpf		sme
Subsystem 56	0.006191950464396287										bbr	ssp	mxa				eco	son		bba	bpa	bbr	gka	lpf		sme
		i	C09819	(Hydroxymethylphenyl)succinyl-CoA	C09820	Benzoylsuccinyl-CoA;	1.1.1.35	3-hydroxyacyl-CoA dehydrogenase;	map00632	Benzoate degradation via CoA ligation	bbr	ssp	mxa				eco	son		bba	bpa	bbr	gka	lpf		sme
		x	C00512	S-Benzoate coenzyme A;	C09820	Benzoylsuccinyl-CoA;	2.3.1.-	<Transferases; Acyltransferases; Transferring groups other than amino-acyl groups>	map00632	Benzoate degradation via CoA ligation	bbr	ssp	mxa	lil	hpa	lin	eco	son		bba	bpa	bbr	gka	lpf	ngo	sme	cte	cli	tdn	aae	hth	nam
Subsystem 57	0.006191950464396287										bbr	ssp	mxa				eco	son		bba	bpa	bbr	gka	lpf		sme
		i	C06001	(S)-3-Hydroxyisobutyrate	C06002	(S)-Methylmalonate semialdehyde	1.1.1.35	3-hydroxyacyl-CoA dehydrogenase;	map00280	Valine, leucine and isoleucine degradation	bbr	ssp	mxa				eco	son		bba	bpa	bbr	gka	lpf		sme
Subsystem 58	0.006191950464396287										bbr	ssp	mxa				eco	son	ama	bba	bpa	bbr		lpf		sme
		i	C00544	Homogentisate;	C07086	Phenylacetic acid;	1.14.13.-	<Oxidoreductases; Acting on paired donors with incorporation of molecular oxygen; With NADH or NADPH as one donor, and incorporation of one atom of oxygen>	map00643	Styrene degradation	bbr	ssp	mxa				eco	son	ama	bba	bpa	bbr		lpf		sme
		x	C05852	2-Hydroxyphenylacetate	C07086	Phenylacetic acid;	1.14.13.-	<Oxidoreductases; Acting on paired donors with incorporation of molecular oxygen; With NADH or NADPH as one donor, and incorporation of one atom of oxygen>	map00360; map00643	Phenylalanine metabolism; Styrene degradation	bbr	ssp	mxa				eco	son	ama	bba	bpa	bbr		lpf		sme
Subsystem 59	0.006191950464396287										bbr	ssp	mxa				eco	son	ama	bba	bpa	bbr		lpf		sme
		i	C13624	Bisphenol A;	C13629	1,2-Bis(4-hydroxyphenyl)-2-propanol	1.14.13.-	<Oxidoreductases; Acting on paired donors with incorporation of molecular oxygen; With NADH or NADPH as one donor, and incorporation of one atom of oxygen>	map00363	Bisphenol A degradation	bbr	ssp	mxa				eco	son	ama	bba	bpa	bbr		lpf		sme
Subsystem 60	0.006191950464396287										bbr	ssp			hpa	lin	eco			bba	bpa	bbr	gka		ngo	sme
		i	C02501	2-Hydroxymuconate	C03453	(Z)-5-Oxohex-2-enedioate;	5.3.2.-	<Isomerases; Intramolecular oxidoreductases; Interconverting keto- and enol-groups>	map00362; map00628	Benzoate degradation via hydroxylation; Fluorene degradation	bbr	ssp			hpa	lin	eco			bba	bpa	bbr	gka		ngo	sme
Subsystem 61	0.006191950464396287										bbr	ssp	mxa				eco	son	ama	bba	bpa	bbr		lpf		sme
		i	C01468	4-Cresol;	C06677	Toluene-4-sulfonate;	1.14.13.-	<Oxidoreductases; Acting on paired donors with incorporation of molecular oxygen; With NADH or NADPH as one donor, and incorporation of one atom of oxygen>	map00622	Toluene and xylene degradation	bbr	ssp	mxa				eco	son	ama	bba	bpa	bbr		lpf		sme
Subsystem 62	0.006191950464396287										bbr	ssp	mxa				eco	son	ama	bba	bpa	bbr		lpf		sme
		i	C15789	6-Oxocampestanol	C15790	Cathasterone	1.14.13.-	<Oxidoreductases; Acting on paired donors with incorporation of molecular oxygen; With NADH or NADPH as one donor, and incorporation of one atom of oxygen>	map00905	Brassinosteroid biosynthesis	bbr	ssp	mxa				eco	son	ama	bba	bpa	bbr		lpf		sme
Subsystem 63	0.006191950464396287										bbr	ssp	mxa	lil			eco	son		bba	bpa	bbr	gka			sme
		i	C00100	Propanoyl-CoA;	C03344	2-Methylacetoacetyl-CoA;	2.3.1.16	acetyl-CoA C-acyltransferase;	map00280	Valine, leucine and isoleucine degradation	bbr	ssp	mxa	lil			eco	son		bba	bpa	bbr	gka			sme
		x	C00100	Propanoyl-CoA;	C00163	Propanoate;	6.2.1.1	acetate---CoA ligase;	map00640	Propanoate metabolism	bbr	ssp	mxa	lil	hpa	lin	eco	son		bba	bpa	bbr	gka	lpf		sme	cte	cli	tdn	aae	hth	nam
Subsystem 64	0.006191950464396287										bbr	ssp	mxa				eco	son		bba	bpa	bbr	gka	lpf		sme
		i	C05260	(S)-3-Hydroxytetradecanoyl-CoA	C05261	3-Oxotetradecanoyl-CoA	1.1.1.35	3-hydroxyacyl-CoA dehydrogenase;	map00062; map00071	Fatty acid elongation in mitochondria; Fatty acid metabolism	bbr	ssp	mxa				eco	son		bba	bpa	bbr	gka	lpf		sme
		x	C05260	(S)-3-Hydroxytetradecanoyl-CoA	C05273	trans-Tetradec-2-enoyl-CoA;	4.2.1.17	enoyl-CoA hydratase;	map00062; map00071	Fatty acid elongation in mitochondria; Fatty acid metabolism	bbr	ssp	mxa	lil			eco	son		bba	bpa	bbr	gka	lpf		sme
		x	C02593	Tetradecanoyl-CoA;	C05273	trans-Tetradec-2-enoyl-CoA;	1.3.99.-	<Oxidoreductases; Acting on the CH-CH group of donors; With other acceptors>	map00071	Fatty acid metabolism	bbr	ssp	mxa				eco	son		bba	bpa	bbr	gka	lpf	ngo	sme
Subsystem 65	0.006191950464396287										bbr			lil			eco	son	ama	bba	bpa	bbr		lpf	ngo	sme
		i	C00399	Ubiquinone;	C17562	2-Polyprenyl-3-methyl-5-hydroxy-6-methoxy-1,4-benzoquinone	2.1.1.64	3-demethylubiquinone-9 3-O-methyltransferase;	map00130	Ubiquinone and other terpenoid-quinone biosynthesis	bbr			lil			eco	son	ama	bba	bpa	bbr		lpf	ngo	sme
Subsystem 66	0.006191950464396287										bbr	ssp	mxa	lil			eco	son		bba	bpa	bbr		lpf		sme
		i	C00212	Adenosine	C00294	Inosine	3.5.4.4	adenosine deaminase;	map00230	Purine metabolism	bbr	ssp	mxa	lil			eco	son		bba	bpa	bbr		lpf		sme
Subsystem 67	0.006191950464396287										bbr	ssp	mxa				eco	son		bba	bpa	bbr	gka	lpf		sme
		i	C05448	3alpha,7alpha,24-Trihydroxy-5beta-cholestanoyl-CoA	C05449	3alpha,7alpha-Dihydroxy-5beta-24-oxocholestanoyl-CoA	1.1.1.35	3-hydroxyacyl-CoA dehydrogenase;	map00120	Primary bile acid biosynthesis	bbr	ssp	mxa				eco	son		bba	bpa	bbr	gka	lpf		sme
Subsystem 68	0.006191950464396287										bbr	ssp	mxa	lil			eco	son		bba	bpa	bbr		lpf		sme
		i	C00559	Deoxyadenosine;	C05512	Deoxyinosine	3.5.4.4	adenosine deaminase;	map00230	Purine metabolism	bbr	ssp	mxa	lil			eco	son		bba	bpa	bbr		lpf		sme
Subsystem 69	0.006191950464396287										bbr	ssp	mxa				eco	son		bba	bpa	bbr	gka	lpf		sme
		i	C05450	3alpha,7alpha,12alpha,24-Tetrahydroxy-5beta-cholestanoyl-CoA;	C05467	3alpha,7alpha,12alpha-Trihydroxy-5beta-24-oxocholestanoyl-CoA;	1.1.1.35	3-hydroxyacyl-CoA dehydrogenase;	map00120	Primary bile acid biosynthesis	bbr	ssp	mxa				eco	son		bba	bpa	bbr	gka	lpf		sme
Subsystem 70	0.006191950464396287										bbr	ssp	mxa				eco	son		bba	bpa	bbr	gka	lpf		sme
		i	C05268	(S)-Hydroxyhexanoyl-CoA;	C05269	3-Oxohexanoyl-CoA;	1.1.1.35	3-hydroxyacyl-CoA dehydrogenase;	map00062; map00071	Fatty acid elongation in mitochondria; Fatty acid metabolism	bbr	ssp	mxa				eco	son		bba	bpa	bbr	gka	lpf		sme
		x	C05268	(S)-Hydroxyhexanoyl-CoA;	C05271	trans-Hex-2-enoyl-CoA;	4.2.1.17	enoyl-CoA hydratase;	map00062; map00071	Fatty acid elongation in mitochondria; Fatty acid metabolism	bbr	ssp	mxa	lil			eco	son		bba	bpa	bbr	gka	lpf		sme
		x	C05270	Hexanoyl-CoA	C05271	trans-Hex-2-enoyl-CoA;	1.3.99.-	<Oxidoreductases; Acting on the CH-CH group of donors; With other acceptors>	map00071	Fatty acid metabolism	bbr	ssp	mxa				eco	son		bba	bpa	bbr	gka	lpf	ngo	sme
Subsystem 71	0.006191950464396287										bbr	ssp	mxa				eco	son	ama	bba	bpa	bbr		lpf		sme
		i	C00530	p-Benzenediol;	C02814	Benzene-1,2,4-triol;	1.14.13.-	<Oxidoreductases; Acting on paired donors with incorporation of molecular oxygen; With NADH or NADPH as one donor, and incorporation of one atom of oxygen>	map00361	gamma-Hexachlorocyclohexane degradation	bbr	ssp	mxa				eco	son	ama	bba	bpa	bbr		lpf		sme
Subsystem 72	0.006191950464396287										bbr	ssp	mxa	lil			eco	son		bba	bpa	bbr	gka			sme
		i	C16338	3-Oxo-OPC4-CoA	C16339	(+)-7-Isojasmonic acid CoA	2.3.1.16	acetyl-CoA C-acyltransferase;	map00592	alpha-Linolenic acid metabolism	bbr	ssp	mxa	lil			eco	son		bba	bpa	bbr	gka			sme
		x	C16336	trans-2-Enoyl-OPC4-CoA	C16338	3-Oxo-OPC4-CoA	4.2.1.17	enoyl-CoA hydratase;	map00592	alpha-Linolenic acid metabolism	bbr	ssp	mxa	lil			eco	son		bba	bpa	bbr	gka	lpf		sme
Subsystem 73	0.006191950464396287										bbr	ssp	mxa				eco	son	ama	bba	bpa	bbr		lpf		sme
		i	C00811	4-Coumarate;	C01197	Caffeate;	1.14.13.-	<Oxidoreductases; Acting on paired donors with incorporation of molecular oxygen; With NADH or NADPH as one donor, and incorporation of one atom of oxygen>	map00940	Phenylpropanoid biosynthesis	bbr	ssp	mxa				eco	son	ama	bba	bpa	bbr		lpf		sme
Subsystem 74	0.006191950464396287										bbr	ssp	mxa	lil			eco	son		bba	bpa	bbr	gka			sme
		i	C16334	3-Oxo-OPC6-CoA	C16335	OPC4-CoA	2.3.1.16	acetyl-CoA C-acyltransferase;	map00592	alpha-Linolenic acid metabolism	bbr	ssp	mxa	lil			eco	son		bba	bpa	bbr	gka			sme
[truncated: 23,320 more rows]
