# Supplementary material for: NIBBS-Search for Fast and Accurate Prediction of Phenotype-Biased Metabolic Systems
Source: PLoS Comput Biol. 2012 May 10;8(5):e1002490. doi: 10.1371/journal.pcbi.1002490 (PMC3349732; doi:10.1371/journal.pcbi.1002490)
Supplement: Table S20 — Runtime comparisons. This file consists of the results of runtime comparison between NIBBS-Search and other algorithms. (XLSX) [file pcbi.1002490.s020.xlsx]

## Sheet: MULE Runtimes
Threshold	Runtime (s)	Log(Runtime)	xy	x^2
50	0				31			0
49	0				31			0
48	0.01	-2	-96	2304	31	-2.70812	0.0019583	0.01
47	0.02	-1.69897	-79.8516	2209	31	-2.12589	0.00748364	0.03
46	0.02	-1.69897	-78.1526	2116	31	-1.54365	0.0285987	0.05
45	0.14	-0.853872	-38.4242	2025	31	-0.96142	0.10929	0.19
44	0.7	-0.154902	-6.81569	1936	31	-0.379186	0.417651	0.89
43	1.01	0.00432137	0.185819	1849	31	0.203048	1.59605	1.9
42	2.85	0.454845	19.1035	1764	31	0.785281	6.09932	4.75
41	3.82	0.582063	23.8646	1681	31	1.36751	23.3085	8.57
40	20.82	1.31848	52.7392	1600	31	1.94975	89.0735	29.39
39	77.23	1.88779	73.6237	1521	31	2.53198	340.394	106.62
38	575.39	2.75996	104.879	1444	31	3.11422	1300.82	682.01
37	3918.87	3.59316	132.947	1369	31	3.69645	4971.07	4600.88
36	15226.1	4.18259	150.573	1296	31	4.27868	18996.9	19827
35	4.93263e+06	6.69308	234.258	1225	31	4.86092	72596.7	4.95246e+06
34					31
33	57.0906				31
32			-0.582234	25.2391	31
31					31
30					31
29					31
28					31
27					31
26					31
25					31
24					31
23					31
22					31
21					31
20					31
19					31
18					31
17					31
16					31
15					31
14					31
13					31
12					31
11					31
10					31
9					31
8					31
7					31
6					31
5					31
4					31
3					31
2					31
1					31
