# Supplementary material for: NIBBS-Search for Fast and Accurate Prediction of Phenotype-Biased Metabolic Systems
Source: PLoS Comput Biol. 2012 May 10;8(5):e1002490. doi: 10.1371/journal.pcbi.1002490 (PMC3349732; doi:10.1371/journal.pcbi.1002490)
Supplement: Table S21 — Correspondence between outputs of NIBBS-Search and MBS-Enum. This file consists of the results of the experiment evaluating the corresspondence of subgraphs output by NIBBS to the set of complete set of maximally-biased subgraphs output by MBS-Enum. (XLSX) [file pcbi.1002490.s021.xlsx]

## Sheet: Sheet1
Pathway Name	Sample Type	Solution Score	# Samples with Score <= to Solution's	Total # of Samples	Empirical P-Value
map00232	Random	0	0	937446321	1.06673e-09	8.97195	4.93795
map00281	Random	0	0	25300609	3.95247e-08	7.40313	1.73239
map00565	Random	0	0	24553038	4.07282e-08	7.39011	1.36173
map00363	Random	0	2	40671331	7.3762e-08	7.13217	3.86951
map00945	Random	0	0	11707310	8.54167e-08	7.06846	0
map00621	Random	0	0	10095546	9.90536e-08	7.00413	1.14613
map00062	Random	0	0	4150239	2.4095e-07	6.61807	0
map00592	Random	0	0	787815	1.26933e-06	5.89642	0
map00400	Random	0	0	412128	2.42642e-06	5.61503	0
map00641	Random	0	336079	1300449581	0.000258434	3.58765	1.71449
map00680	Random	0.291606	0	367758	2.71917e-06	5.56556	0
map00030	Random	0.343637	0	3654140	2.73662e-07	6.56279	0
map00020	Random	0.359432	0	3896497	2.56641e-07	6.59067	0
map00640	Random	0.373753	0	346233	2.88822e-06	5.53937	0
map00562	Random	0.395285	0	383485	2.60766e-06	5.58375	0.477121
map00930	Random	0.400617	0	12556452	7.96403e-08	7.09887	4.19476
map00450	Random	0.415206	0	11515566	8.6839e-08	7.06129	1
map00410	Random	0.434613	0	9981080	1.0019e-07	6.99918	2.80754
map00620	Random	0.444239	0	39819900	2.51131e-08	7.6001	0
map00010	Random	0.460975	30	1223602	2.5335e-05	4.59628	0.207608
map00730	Random	0.468097	98	346106518	2.86039e-07	6.54357	1.25136
map00720	Random	0.475986	0	88130184	1.13469e-08	7.94512	4.72137
map00521	Random	0.485621	59838	14075657	0.00425124	2.37148	0.137512
map00791	Random	0.5	0	82951365	1.20553e-08	7.91882	5.33184
map00910	Random	0.510381	0	63577641	1.57288e-08	7.8033	1.34242
map00524	Random	0.514512	0	606452	1.64893e-06	5.7828	1.54407
map00600	Random	0.559017	0	48484698	2.06251e-08	7.6856	4.93437
map00630	Random	0.613842	0	377054	2.65213e-06	5.5764	0.30103
map00561	Random	0.65263	0	4642783	2.15388e-07	6.66678	2.75205
map00364	Random	0.654654	9	9687921	1.03221e-06	5.98623	4.47927
map00460	Random	0.654654	2449474	364526824	0.0067196	2.17266	1.09753
map00430	Random	0.699206	30	515885898	6.00908e-08	7.22119	5.571
map00750	Random	0.702728	0	1051090	9.51392e-07	6.02164	3.43249
ec00232	Same Sized	0	86686	937446321	9.24714e-05	4.03399
ec00281	Same Sized	0	53	25300609	2.13434e-06	5.67074
ec00565	Same Sized	0	22	24553038	9.36748e-07	6.02838
ec00363	Same Sized	0	22213	40671331	0.000546183	3.26266
ec00945	Same Sized	0	0	11707310	8.54167e-08	7.06846
ec00621	Same Sized	0	13	10095546	1.38675e-06	5.858
ec00062	Same Sized	0	0	4150239	2.4095e-07	6.61807
ec00592	Same Sized	0	0	787815	1.26933e-06	5.89642
ec00400	Same Sized	0	0	412128	2.42642e-06	5.61503
ec00641	Same Sized	0	17415220	1300449581	0.0133917	1.87316
ec00680	Same Sized	0.291606	0	367758	2.71917e-06	5.56556
ec00030	Same Sized	0.343637	0	3654140	2.73662e-07	6.56279
ec00020	Same Sized	0.359432	0	3896497	2.56641e-07	6.59067
ec00640	Same Sized	0.373753	0	346233	2.88822e-06	5.53937
ec00562	Same Sized	0.395285	2	383485	7.82297e-06	5.10663
ec00930	Same Sized	0.400617	15658	12556452	0.00124709	2.9041
ec00450	Same Sized	0.415206	9	11515566	8.6839e-07	6.06129
ec00410	Same Sized	0.434613	641	9981080	6.43217e-05	4.19164
ec00620	Same Sized	0.444239	0	39819900	2.51131e-08	7.6001
ec00010	Same Sized	0.460975	49	1223602	4.08629e-05	4.38867
ec00730	Same Sized	0.468097	1765	346106518	5.10248e-06	5.29222
ec00720	Same Sized	0.475986	52646	88130184	0.000597378	3.22375
ec00521	Same Sized	0.485621	82128	14075657	0.00583482	2.23397
ec00791	Same Sized	0.5	214704	82951365	0.00258832	2.58698
ec00910	Same Sized	0.510381	21	63577641	3.46034e-07	6.46088
ec00524	Same Sized	0.514512	34	606452	5.77126e-05	4.23873
ec00600	Same Sized	0.559017	85973	48484698	0.00177322	2.75124
ec00630	Same Sized	0.613842	1	377054	5.30427e-06	5.27537
ec00561	Same Sized	0.65263	564	4642783	0.000121694	3.91473
ec00364	Same Sized	0.654654	301487	9687921	0.03112	1.50696
ec00460	Same Sized	0.654654	30662039	364526824	0.0841146	1.07513
ec00430	Same Sized	0.699206	11544118	515885898	0.0223773	1.65019
ec00750	Same Sized	0.702728	2706	1051090	0.00257542	2.58915
ec00010	Same Sized	0.460975	49	1223602	4.08629e-05	4.38867
ec00020	Same Sized	0.359432	0	3896497	2.56641e-07	6.59067
ec00030	Same Sized	0.343637	0	3654140	2.73662e-07	6.56279
ec00062	Same Sized	0	0	4150239	2.4095e-07	6.61807
ec00232	Same Sized	0	86686	937446321	9.24714e-05	4.03399
ec00281	Same Sized	0	53	25300609	2.13434e-06	5.67074
ec00363	Same Sized	0	22213	40671331	0.000546183	3.26266
ec00364	Same Sized	0.654654	301487	9687921	0.03112	1.50696
ec00400	Same Sized	0	0	412128	2.42642e-06	5.61503
ec00410	Same Sized	0.434613	641	9981080	6.43217e-05	4.19164
ec00430	Same Sized	0.699206	11544118	515885898	0.0223773	1.65019
ec00450	Same Sized	0.415206	9	11515566	8.6839e-07	6.06129
ec00460	Same Sized	0.654654	30662039	364526824	0.0841146	1.07513
ec00521	Same Sized	0.485621	82128	14075657	0.00583482	2.23397
ec00524	Same Sized	0.514512	34	606452	5.77126e-05	4.23873
ec00561	Same Sized	0.65263	564	4642783	0.000121694	3.91473
ec00562	Same Sized	0.395285	2	383485	7.82297e-06	5.10663
ec00565	Same Sized	0	22	24553038	9.36748e-07	6.02838
ec00592	Same Sized	0	0	787815	1.26933e-06	5.89642
ec00600	Same Sized	0.559017	85973	48484698	0.00177322	2.75124
ec00620	Same Sized	0.444239	0	39819900	2.51131e-08	7.6001
ec00621	Same Sized	0	13	10095546	1.38675e-06	5.858
ec00630	Same Sized	0.613842	1	377054	5.30427e-06	5.27537
ec00640	Same Sized	0.373753	0	346233	2.88822e-06	5.53937
ec00641	Same Sized	0	17415220	1300449581	0.0133917	1.87316
ec00680	Same Sized	0.291606	0	367758	2.71917e-06	5.56556
ec00720	Same Sized	0.475986	52646	88130184	0.000597378	3.22375
ec00730	Same Sized	0.468097	1765	346106518	5.10248e-06	5.29222
ec00750	Same Sized	0.702728	2706	1051090	0.00257542	2.58915
ec00791	Same Sized	0.5	214704	82951365	0.00258832	2.58698
ec00910	Same Sized	0.510381	21	63577641	3.46034e-07	6.46088
ec00930	Same Sized	0.400617	15658	12556452	0.00124709	2.9041
ec00945	Same Sized	0	0	11707310	8.54167e-08	7.06846
ec00631	Random	0	649248643	-702431355	-0.924288	#NUM!
ec00402	Random	0	3348729	-1963525813	-0.00170547	#NUM!
ec00785	Random	0.447214	35903012	-1613086284	-0.0222573	#NUM!
ec00631	Same Sized	0	985952412	-702431355	-1.40363	#NUM!
ec00402	Same Sized	0	66612426	-1963525813	-0.0339249	#NUM!
ec00785	Same Sized	0.447214	129184838	-1613086284	-0.0800855	#NUM!
ec00072	Random	0.333333	3448872	18706596	0.184367	0.734318
ec00072	Same Sized	0.333333	42563690	18706596	2.27533	-0.357044
ec00072	Same Sized	0.333333	42563690	18706596	2.27533	-0.357044

## Sheet: Sheet2
Pathway ID	Random Sampling	NIBBS-Search Score	Randoms Better	Randoms Generated	Emperical P-Value	LOG(P-Value)
ec00232	Random	0	0	937446321	1.06673e-09	8.97195
ec00720	Random	0.475986	0	88130184	1.13469e-08	7.94512
ec00791	Random	0.5	0	82951365	1.20553e-08	7.91882
ec00910	Random	0.510381	0	63577641	1.57288e-08	7.8033
ec00600	Random	0.559017	0	48484698	2.06251e-08	7.6856
ec00620	Random	0.444239	0	39819900	2.51131e-08	7.6001
ec00281	Random	0	0	25300609	3.95247e-08	7.40313
ec00565	Random	0	0	24553038	4.07282e-08	7.39011
ec00430	Random	0.699206	30	515885898	6.00908e-08	7.22119
ec00363	Random	0	2	40671331	7.3762e-08	7.13217
ec00930	Random	0.400617	0	12556452	7.96403e-08	7.09887
ec00945	Random	0	0	11707310	8.54167e-08	7.06846
ec00450	Random	0.415206	0	11515566	8.6839e-08	7.06129
ec00621	Random	0	0	10095546	9.90536e-08	7.00413
ec00410	Random	0.434613	0	9981080	1.0019e-07	6.99918
ec00561	Random	0.65263	0	4642783	2.15388e-07	6.66678
ec00062	Random	0	0	4150239	2.4095e-07	6.61807
ec00020	Random	0.359432	0	3896497	2.56641e-07	6.59067
ec00030	Random	0.343637	0	3654140	2.73662e-07	6.56279
ec00730	Random	0.468097	98	346106518	2.86039e-07	6.54357
ec00750	Random	0.702728	0	1051090	9.51392e-07	6.02164
ec00364	Random	0.654654	9	9687921	1.03221e-06	5.98623
ec00592	Random	0	0	787815	1.26933e-06	5.89642
ec00524	Random	0.514512	0	606452	1.64893e-06	5.7828
ec00400	Random	0	0	412128	2.42642e-06	5.61503
ec00562	Random	0.395285	0	383485	2.60766e-06	5.58375
ec00630	Random	0.613842	0	377054	2.65213e-06	5.5764
ec00680	Random	0.291606	0	367758	2.71917e-06	5.56556
ec00640	Random	0.373753	0	346233	2.88822e-06	5.53937
ec00010	Random	0.460975	30	1223602	2.5335e-05	4.59628
ec00641	Random	0	336079	1300449581	0.000258434	3.58765
ec00521	Random	0.485621	59838	14075657	0.00425124	2.37148
ec00460	Random	0.654654	2449474	364526824	0.0067196	2.17266

## Sheet: Sheet3
Pathway ID	Random Sampling	NIBBS-Search Score	Randoms Better	Randoms Generated	Emperical P-Value	LOG(P-Value)
ec00620	Same Sized	0.444239	0	39819900	2.51131e-08	7.6001
ec00945	Same Sized	0	0	11707310	8.54167e-08	7.06846
ec00062	Same Sized	0	0	4150239	2.4095e-07	6.61807
ec00020	Same Sized	0.359432	0	3896497	2.56641e-07	6.59067
ec00030	Same Sized	0.343637	0	3654140	2.73662e-07	6.56279
ec00910	Same Sized	0.510381	21	63577641	3.46034e-07	6.46088
ec00450	Same Sized	0.415206	9	11515566	8.6839e-07	6.06129
ec00565	Same Sized	0	22	24553038	9.36748e-07	6.02838
ec00592	Same Sized	0	0	787815	1.26933e-06	5.89642
ec00621	Same Sized	0	13	10095546	1.38675e-06	5.858
ec00281	Same Sized	0	53	25300609	2.13434e-06	5.67074
ec00400	Same Sized	0	0	412128	2.42642e-06	5.61503
ec00680	Same Sized	0.291606	0	367758	2.71917e-06	5.56556
ec00640	Same Sized	0.373753	0	346233	2.88822e-06	5.53937
ec00730	Same Sized	0.468097	1765	346106518	5.10248e-06	5.29222
ec00630	Same Sized	0.613842	1	377054	5.30427e-06	5.27537
ec00562	Same Sized	0.395285	2	383485	7.82297e-06	5.10663
ec00010	Same Sized	0.460975	49	1223602	4.08629e-05	4.38867
ec00524	Same Sized	0.514512	34	606452	5.77126e-05	4.23873
ec00410	Same Sized	0.434613	641	9981080	6.43217e-05	4.19164
ec00232	Same Sized	0	86686	937446321	9.24714e-05	4.03399
ec00561	Same Sized	0.65263	564	4642783	0.000121694	3.91473
ec00363	Same Sized	0	22213	40671331	0.000546183	3.26266
ec00720	Same Sized	0.475986	52646	88130184	0.000597378	3.22375
ec00930	Same Sized	0.400617	15658	12556452	0.00124709	2.9041
ec00600	Same Sized	0.559017	85973	48484698	0.00177322	2.75124
ec00750	Same Sized	0.702728	2706	1051090	0.00257542	2.58915
ec00791	Same Sized	0.5	214704	82951365	0.00258832	2.58698
ec00521	Same Sized	0.485621	82128	14075657	0.00583482	2.23397
ec00641	Same Sized	0	17415220	1300449581	0.0133917	1.87316
ec00430	Same Sized	0.699206	11544118	515885898	0.0223773	1.65019
ec00364	Same Sized	0.654654	301487	9687921	0.03112	1.50696
ec00460	Same Sized	0.654654	30662039	364526824	0.0841146	1.07513		0.878788
					0.01
